# Supplementary material
Source: publisher figshare collection journal article supplement (https://sage.figshare.com/ndownloader/files/17298707)
Supplement: Supplementary file 1 [file 17298707]

## Sheet: SuppData3 E2K turquoise.results
TF	Target/Input	Targets/Database	Fraction/Input	Fraction/Database	Difference	P-value	Z-score	Combined Score	Genes
SUZ12-20075857	599	4356	0.345245	0.103559	0.241686	2.19314e-151	-0.896389	310.962	CRHBP;HTR6;UNC5A;CACNA2D1;CACNA2D3;UNC5C;ASPHD1;VOPP1;ASPHD2;JAG2;JAG1;L1CAM;FXYD5;KCNC1;KCNC3;KCNC4;CHST8;CHST7;GSTO1;TMEFF2;MMP14;MMP16;MMP15;MMP17;CHST1;CHST2;KCNA1;KCNA2;RIC3;LGR6;IL1RAP;FADS3;EFEMP1;KCNH2;KCNH3;DGAT2;KCNH5;DGAT1;KCNH7;APOO-PS;LY6H;GRIA4;KCNF1;HTR1F;HTR1A;BOC;GRID1;ADAMTS20;TNFRSF21;LRTM2;KCNJ4;KCNJ9;HTR5A;TM6SF1;HCRTR1;KCNK4;ICAM5;KCNQ5;SDC3;KCNN2;NTNG1;NTNG2;GRIK4;GRIK1;GRI…
MTF2-20144788	421	2981	0.242651	0.0708699	0.171781	4.1473e-104	-1.18682	282.519	CRHBP;HTR6;UNC5A;CACNA2D1;CACNA2D3;UNC5C;JAG1;D430041D05RIK;FXYD5;ACHE;KCNC1;KCNC4;PANX1;CHST8;CHST7;TMEFF2;MMP14;SLC7A8;MMP15;MMP17;CHST2;KCNA1;KCNA2;ADAM22;SLC7A1;WNT7B;DCBLD1;LGR6;CRLF1;FADS3;KCNH3;DGAT2;KCNH5;DGAT1;FST;LY6H;IGSF21;GRIA4;KCNF1;HTR1F;HTR1A;SPRN;ELFN1;BOC;ITGB8;GRID1;ITGA3;SEZ6L;ADAMTS20;TMBIM4;ITGA7;TNFRSF21;PCDH1;KCNJ4;NTRK2;PCDH7;NTRK3;PCDH8;SYT16;TM6SF1;SYT12;KCNK4;ICAM5;KCN…
SUZ12-18692474	282	1909	0.162536	0.0453843	0.117152	3.36378e-71	-1.61486	262.044	CRHBP;HTR6;UNC5A;CACNA2D1;CACNA2D3;UNC5C;D430041D05RIK;ACHE;KCNC1;KCNC4;CHST8;TMEFF2;MMP16;SLC7A8;MMP15;MMP17;CHST2;KCNA1;KCNA2;ADAM23;WNT7B;CRLF1;EFEMP1;KCNH3;KCNH5;KCNH7;FST;LY6H;IGSF21;GRIA3;KCNF1;HTR1F;HTR1A;TBXAS1;BOC;GRID1;SEZ6L;ADAMTS20;ADORA2B;ITGA7;TNFRSF21;PCDH1;KCNJ4;NTRK2;NTRK3;PCDH7;PCDH8;HCRTR1;SYT12;ST7;KCNK4;KCNK12;ISLR2;KCNQ5;ADCYAP1R1;UGT8A;KCNN1;NTNG1;NRP1;NRP2;GRIK4;GRIK1;GRIK…
SUZ12-18974828	287	1932	0.165418	0.0459311	0.119487	5.09518e-73	-1.52742	254.255	CRHBP;HTR6;CACNA2D1;CACNA2D3;UNC5C;D430041D05RIK;ACHE;KCNC1;KCNC4;CHST8;CHST7;SLC7A4;TMEFF2;SLC7A8;MMP16;MMP15;MMP17;CHST2;KCNA1;KCNA2;WNT7B;LGR6;CRLF1;PLOD2;KCNH3;DGAT2;FST;LY6H;GRIA3;KCNF1;HTR1F;HTR1A;BOC;ITGB8;GRID1;SEZ6L;ADAMTS20;TNFRSF1A;ADORA2B;ITGA7;TNFRSF21;PCDH1;KCNJ4;NTRK2;PCDH7;NTRK3;PCDH8;SYT16;TM6SF1;HCRTR1;SYT12;KCNK4;ICAM5;KCNK12;ISLR2;KCNQ5;ADCYAP1R1;NTNG1;NRP1;NRP2;GRIK1;GRIK2;MC…
REST-21632747	285	2339	0.164265	0.0556071	0.108658	5.89579e-56	-1.76433	224.37	HTR6;CXADR;UNC5A;6-MAR;JAG2;EIF2AK3;L1CAM;FXYD6;KCNC1;KCNC3;CHST8;MMP16;CHST1;ATL1;P4HTM;RIC3;WNT7B;LGR6;KCNH3;KCNH7;CASD1;LY6H;GRIA1;2510039O18RIK;IGSF21;HTR1F;HTR1A;IGSF11;TBXAS1;ECE1;NEO1;GRID1;HTR3A;NRG2;LRTM2;TSPAN33;PCDH1;KCNJ4;NTRK2;PCDH9;NTRK3;PCDH8;HTR5A;SST;KCNK12;OMG;ADCYAP1R1;TMEM63C;KCNN2;MRAP2;GRIK5;GRIK4;GRIK2;KCNT1;CRTAC1;SYP;FITM2;RELN;OS9;IL34;NEK11;PLAT;CAR4;CACNA1A;CACNA1H;CAC…
EGR1-20690147	592	6207	0.34121	0.147564	0.193646	1.96204e-85	-0.889716	173.535	UNC5A;FXYD6;HYOU1;KCNC1;KCNC3;KCNC4;GSTO1;TMEFF2;MMP15;MMP17;KCNA2;ADAM22;ADAM23;KCNB2;KCNG2;FADS3;MAP3K6;KCNH2;KCNH3;FBXO17;KCNF1;HTR3A;KCNJ9;HTR5A;SORL1;ST7;KCNK4;BSG;FBXO6;KCNQ5;SDC3;NEU1;KCNN1;NTNG1;NTNG2;FBXL4;FBXL6;KCNT1;SDF4;AGTRAP;TLCD1;IGF1R;ADAM11;ADAM17;PLD3;SDK1;SDK2;TAZ;GRM2;GRM8;RALB;PSMB10;SLIT3;SLIT2;HS3ST1;CD9;BCAM;ST3GAL5;ST3GAL3;GAS6;NFIB;FKBPL;INSIG1;SLC35A1;SLC35B2;SLC35B4;SL…
REST-18959480	286	2868	0.164841	0.0681834	0.0966581	1.13879e-40	-1.81258	166.709	HTR6;HEMK1;UNC5A;CACNA2D3;UNC5C;JAG2;L1CAM;TBL2;FXYD6;LGMN;KCNC1;CHST8;CHST1;ADAM23;RIC3;WNT7B;KCNH5;FBXW7;APOA1BP;LY6H;SLC27A4;2510039O18RIK;IGSF21;HTR1A;NEO1;GRID1;HTR3A;ADAMTS20;PCDH1;NTRK2;NTRK3;PCDH7;PCDH8;SYT13;HTR5A;SORL1;SST;ST7;KCNK12;ALG2;TMEM63C;B4GALNT4;FBXL6;GRIK5;GRIK4;B230118H07RIK;GRIK2;MC4R;KCNT1;CRTAC1;SYP;RELN;GRIN1;NEK11;PLAT;CAR4;ADAM11;PPIH;CACNA1B;CACNA1A;CACNA1H;CACNA1G;SN…
RNF2-18974828	185	1300	0.106628	0.030906	0.0757222	4.94545e-44	-1.52418	151.984	HTR6;FIBCD1;CACNA2D3;UNC5C;RETSAT;CADM3;JAG1;CADM2;ABCA3;D430041D05RIK;GRIN2B;KCNC4;CHST8;CHST7;ELOVL4;SLC7A8;MMP16;MMP15;DSCAML1;CHST2;KCNA1;KCNA2;SEZ6;FSTL4;EXTL1;CSMD1;WNT7B;DCBLD1;CRLF1;CXCL14;FADS3;DGAT2;FST;SLC9A2;OLFM2;SLC9A5;IGSF21;NPTX1;BDNF;HTR1A;CXCL12;CNTNAP1;RASGRF1;BOC;EDIL3;GRID1;SEZ6L;PPM1L;PCDH1;KCNJ4;NTRK2;PCDH7;NTRK3;PCDH8;HCRTR1;NELL2;NELL1;SYT12;KCNK4;SPON1;EPHB1;EPHA5;EPHA4;…
EZH2-18974828	185	1300	0.106628	0.030906	0.0757222	4.94545e-44	-1.52418	151.984	HTR6;FIBCD1;CACNA2D3;UNC5C;RETSAT;CADM3;JAG1;CADM2;ABCA3;D430041D05RIK;GRIN2B;KCNC4;CHST8;CHST7;ELOVL4;SLC7A8;MMP16;MMP15;DSCAML1;CHST2;KCNA1;KCNA2;SEZ6;FSTL4;EXTL1;CSMD1;WNT7B;DCBLD1;CRLF1;CXCL14;FADS3;DGAT2;FST;SLC9A2;OLFM2;SLC9A5;IGSF21;NPTX1;BDNF;HTR1A;CXCL12;CNTNAP1;RASGRF1;BOC;EDIL3;GRID1;SEZ6L;PPM1L;PCDH1;KCNJ4;NTRK2;PCDH7;NTRK3;PCDH8;HCRTR1;NELL2;NELL1;SYT12;KCNK4;SPON1;EPHB1;EPHA5;EPHA4;…
SUZ12-16625203	172	1270	0.0991354	0.0301928	0.0689426	1.90074e-38	-1.68168	146.064	CRHBP;HTR6;CACNA2D3;UNC5C;THY1;ABCA5;KCNC4;SMPD1;CHST8;ELOVL4;TMEFF2;MMP16;SLC7A8;MMP15;MMP17;CHST2;KCNA1;KCNA2;SEZ6;FSTL4;ABCB1A;CXCL14;DGAT2;FST;SLC9A9;LY6H;NPTX1;NPTX2;KCNF1;BDNF;HTR1F;HTR1A;CXCL12;CNTNAP1;RASGRF1;GRID1;SEZ6L;ADAMTS20;ITGA7;PPM1L;LRRC8C;PCDH1;NTRK2;NTRK3;PCDH7;PCDH8;TM6SF1;SPON1;EPHB1;EPHA5;EPHA7;EPHA8;KCNK12;SFRP2;ADCYAP1R1;PCDH10;SDC3;NRP1;PTPRU;NRP2;PTPRO;GRIK1;GRIK2;PCSK5;…
JARID2-20075857	183	1258	0.105476	0.0299075	0.075568	9.85963e-45	-1.35796	137.599	HTR6;XYLB;FIBCD1;CACNA2D3;VOPP1;CADM3;D430041D05RIK;KCNC1;KCNC4;PTH1R;CHST8;ELOVL4;MMP15;CHST1;DSCAML1;CHST2;KCNA1;KCNA2;SEZ6;FSTL4;CSMD1;WNT7B;LRG1;CRLF1;CXCL14;FST;SLC9A2;SLC9A5;NPTXR;IGSF21;NPTX1;TMEM120B;HTR1A;PTPRE;CXCL12;RASGRF1;ECE1;ELFN1;GRID1;HTR3A;SEZ6L;ST6GALNAC5;PPM1L;LRP3;LRRC8C;SLITRK5;PCDH1;LINGO2;KCNJ4;NTRK2;PCDH7;NTRK3;PCDH8;TM6SF1;NELL2;NELL1;SYT12;MDGA2;KCNK4;SPON1;EPHB1;MFSD2A…
TRIM28-19339689	319	3072	0.183862	0.0730333	0.110828	4.50984e-49	-1.15884	129.002	SPINT2;HTR6;UNC5C;SAR1B;JAG2;PRPF38B;JAG1;KCNC3;KCNC4;CHST8;MMP14;MMP15;CHST2;ADAM22;IL1RAP;MAP3K6;DGAT1;FBXW2;BLM;2510039O18RIK;NEO1;TNFRSF21;KCNJ4;BSG;TRIM13;SYNGR2;KCNN1;KCNN2;NTNG2;FBXL2;FBXL4;FBXL6;SDF4;MRPS26;KIN;KIT;PCNX;NDUFAB1;CELSR2;SDK2;SYNGR3;SLC3A2;NT5C3;SLIT2;TPBG;NDFIP2;FANK1;GAS6;IL10RB;G0S2;OSTM1;PARK7;CPE;C1QL2;DNAJC1;SLC35A1;SLC35A3;VEZT;IFITM1;IFITM2;SLC35B4;SLC35A5;IFRD1;CPT1…
SUZ12-18555785	150	1058	0.0864553	0.0251527	0.0613026	1.55923e-35	-1.44687	115.961	HTR6;FIBCD1;UNC5C;CLDN5;CADM2;ACHE;KCNC4;GPR37;ELOVL4;SLC7A8;MMP15;DSCAML1;CHST2;KCNA1;KCNA2;SEZ6;EXTL1;CSMD1;CRLF1;CXCL14;KCNH5;DGAT2;FST;SLC9A2;FRMD3;LY6H;IL4RA;IGSF21;NPTX1;NPTX2;GRIA4;KCNF1;HTR1A;CXCL12;RASGRF1;BOC;EDIL3;GRID1;ADAMTS20;TNFRSF21;PPM1L;SLITRK5;KCNJ4;PCDH7;NTRK3;PCDH8;SYT13;NELL2;NELL1;SYT12;KCNK4;SPON1;EPHB1;SCN1B;EPHA7;KCNK12;KCNQ5;EPHA3;ADCYAP1R1;NTNG1;NRP1;NRP2;SLC7A14;PTPRM…
SOX2-21211035	342	3420	0.197118	0.0813066	0.115812	1.63136e-49	-1.03206	115.939	CXADR;UNC5A;CACNA2D1;CACNA2D3;UNC5C;JAG1;FXYD6;LGMN;TMEFF2;SNX25;RIC3;KCNB2;SNX14;LGR6;KCNG2;IL1RAP;EFEMP1;KCNH2;KCNH5;KCNH7;FBXW7;ATP11B;GRIA1;BLM;KCNF1;HTR1A;BOC;NEO1;GRID1;TM6SF1;ST7;OCIAD1;SLC23A2;FBXO8;KCNQ5;TRIM11;SDC3;NTNG1;GRIK2;KCNT2;KIT;PDCL3;KCNS3;ADAM17;CNTN6;SDK1;CNTN3;CNTN4;SDK2;GRM2;GRM7;GRM8;RALB;SLC3A2;SLIT3;HS3ST1;ERCC5;NCSTN;ST3GAL5;ST3GAL6;NDFIP2;NDFIP1;ADAMTSL1;ADCY2;NFIB;PAR…
YAP1-20516196	266	2329	0.153314	0.0553693	0.0979448	2.98867e-47	-1.0497	112.451	CXADR;CACNA2D1;UNC5C;FN1;SLC39A10;TMEFF2;SLC7A8;CHST1;CHST2;SLC7A1;SPP1;WNT7B;SNX19;AGRN;KCNH3;KCNH5;FBXW7;ATP11B;GRIA1;IGSF21;GRIA3;HTR1A;CLPTM1L;GRID1;SEZ6L;ADORA2B;NTRK2;PCDH9;NTRK3;SYT16;PTGFRN;MFSD11;KCNQ5;SLC45A4;SYNGR2;SLC10A7;CALR;FBXL4;SYP;CANX;KIT;EEF1E1;RELN;MGAT5;ORMDL3;MGAT2;VEGFC;KCNS3;NDUFAB1;2610524H06RIK;PLAT;IGF1R;CACNA1A;CACNA1C;CNTN6;SDK1;SDK2;GRM5;GRM7;GRM8;ATP6AP2;SLC3A2;SV2…
MITF-21258399	531	5578	0.306052	0.132611	0.173441	1.4163e-74	-0.6326	107.569	CXADR;DDIT4;ORAI3;ORAI2;PLBD2;JAG2;PRPF38B;JAG1;EIF2AK3;HYOU1;MMP14;MMP15;MMP17;CHST1;KCNA2;SNX25;ADAM23;SNX19;AGRN;LGR4;IL1RAP;FADS3;LAPTM4A;EFEMP1;KCNH3;DGAT2;FBXO17;BLM;GRIA4;G6PC3;CLPTM1L;ECE1;E2F1;KCNJ4;ST7;SLC23A2;BSG;BTD;KCNQ5;SYNGR1;NEU1;KCNN1;KCNN2;FBXL2;GRIK2;HERPUD1;BBS5;AGTRAP;KIN;KIT;TLCD1;FITM2;SORT1;PDCL3;RIT1;KCNS3;NDUFAB1;GRINA;PLAT;CELSR2;IGF1R;GNPTAB;PLAU;SPINK8;DNAJB12;ADAM11;…
E2F1-18555785	393	4172	0.226513	0.0991846	0.127328	1.31172e-51	-0.907561	106.33	SPINT2;CXADR;DDIT4;RDH11;RDH14;KCNC3;ADAM23;DCBLD2;SNX14;LAPTM4A;DGAT2;FBXW7;MINPP1;2510039O18RIK;MBIP;AP4S1;1600002H07RIK;ECE1;BOC;TNFRSF21;OCIAD1;BSG;BTD;TRIM11;TMEM63B;FBXL6;RAB9;MRPS11;HERPUD1;UIMC1;SDF4;AGTRAP;KIT;TLCD1;DNAJB12;TAZ;ATP6AP1;SLC3A2;TRDMT1;TPBG;CCS;CD9;NCSTN;NDFIP1;WDR44;SLC17A5;PCYOX1L;PLP2;PARK7;CLU;IFNAR2;INSIG1;FANCL;TPP1;LEPROT;DNAJB9;SLC35B3;SLC35B2;IFITM1;IFITM2;SLC35B4;…
AR-19668381	343	3519	0.197695	0.0836602	0.114034	2.14142e-47	-0.989401	106.321	HTR6;CACNA2D3;SAR1B;RDH14;PRPF38B;EIF2AK3;KCNC1;CHST8;TMEFF2;MMP16;CHST1;ADAM22;KCNB2;LGR6;FADS3;KCNH2;KCNH5;MINPP1;GRIA1;GRIA4;ECE1;PTER;BOC;NEO1;GRID1;ADAMTS20;TNFRSF1A;TNFRSF21;TM6SF1;SORL1;SST;ST7;SLC23A2;TMEM63C;NTNG1;NTNG2;PTK7;GRIK5;GRIK4;KCNT1;KCNT2;PDCL3;NEK11;PLAT;CELSR2;IGF1R;DNAJB12;ADAM15;IGF2R;SDK1;CNTN1;CNTN3;CNTN4;SDK2;TNFAIP6;GRM7;GRM8;SV2A;SLIT1;SLIT3;SLIT2;TRDMT1;CCK;CD9;ERCC5;…
JARID2-20064375	149	1117	0.085879	0.0265554	0.0593236	1.10366e-32	-1.17931	86.7788	HTR6;CACNA2D1;FIBCD1;CACNA2D3;UNC5C;JAG1;D430041D05RIK;GRIN2B;KCNC1;KCNC4;CHST7;TMEFF2;MMP15;CHST2;KCNA1;KCNA2;FSTL4;CSMD1;WNT7B;CRLF1;CXCL14;FST;SLC9A2;NPTXR;IGSF21;NPTX1;NPTX2;BDNF;PTPRD;CXCL12;RASGRF1;ELFN1;GRID1;SEZ6L;PPM1L;SLITRK5;PCDH1;KCNJ4;LINGO1;NTRK2;PCDH7;PCDH8;NELL2;NELL1;SYT12;MDGA2;SPON1;EPHA5;EPHA7;KCNK12;KCNQ5;ADCYAP1R1;UGT8A;PCDH10;PCDH19;NTNG1;NTNG2;MRAP2;NRP1;PTPRU;NRP2;PTPRM;C…
CREM-20920259	536	5776	0.308934	0.137318	0.171616	8.70025e-72	-0.504523	82.5515	NUP107;SPINT2;CXADR;ASPHD1;UNC50;JAG2;PRPF38B;EIF2AK3;HYOU1;KCNC1;KCNC3;ATAD1;SNX14;LGR6;LAPTM4A;MAP3K6;DGAT2;DGAT1;FBXO17;ATP11B;FBXW2;BLM;MBIP;G6PC3;CLPTM1L;NEO1;E2F1;KCNJ9;OCIAD1;BSG;FBXO6;FBXO8;TRIM11;SYNGR1;NEU1;KCNN2;B4GALNT4;BRI3BP;FBXL2;HERPUD1;BBS5;AGTRAP;KIT;ORMDL3;PCNX;SORT1;GRIN1;PDCL3;NEK11;ENPP5;DNAJB12;ADAM10;ADAM15;DNAJB11;SLC41A3;PLD3;SDK1;SDK2;ZMYND19;GRM7;ATP6AP2;SYNGR3;SLC3A2;…
RCOR3-21632747	292	2851	0.1683	0.0677793	0.10052	1.35578e-43	-0.835814	82.5005	UNC5A;DDIT4;TMEM126A;L1CAM;KCNC3;CHST8;CHST1;ATL1;ATL2;SLC7A1;SNX25;WNT7B;KCNH2;KCNH3;DGAT2;GRIA1;2510039O18RIK;IGSF21;TMEM120B;HTR1F;ECE1;ELFN1;HTR3A;NRG2;TNFRSF21;LRTM2;TSPAN33;PCDH1;NTRK2;PCDH8;HTR5A;SST;TBATA;SLC23A2;KCNK12;TMEM63B;KCNN1;B4GALNT4;NTNG1;SLC10A7;DDR1;GRIK5;CRTAC1;GAA;TLCD1;FITM2;RELN;PCNX;GABBR2;GABBR1;CELSR2;IGF1R;PLAU;FAM3C;CAR4;DNAJB12;SIDT1;CACNA1A;CACNA1H;CACNA1I;SYT3;SYT1…
ZFX-18555785	308	3249	0.177522	0.0772413	0.10028	4.88678e-40	-0.880101	79.664	SPINT2;UNC50;RDH14;GSTO1;MMP14;ATAD1;DCBLD2;SNX14;LGR4;LAPTM4A;DGAT1;ATP11B;FBXW2;BLM;AP4S1;G6PC3;PTER;BOC;OCIAD1;SLC23A2;FBXO6;FBXO8;SYNGR1;SYNGR2;B4GALNT4;BRI3BP;PTK7;FBXL4;UIMC1;BBS5;MRPS26;PDCL3;NDUFAB1;ADAM15;IGF2R;ZMYND19;SLC3A2;NT5C3;TRDMT1;CCS;ERCC5;NUP210;BCAM;NCSTN;ST3GAL5;NDFIP1;ADAMTSL1;G0S2;FKBPL;THOC7;FKBP9;IFNAR1;INSIG1;GLT8D1;OSBPL2;DNAJB9;SLC35A1;SLC35B2;SLC35B4;DAG1;IFRD1;ADCK2;…
WT1-20215353	183	1663	0.105476	0.0395359	0.0659396	2.12072e-30	-1.11057	75.8803	ISLR;CACNA2D1;UNC5C;JAG1;L1CAM;NR2F6;TBL2;FXYD6;FXYD5;SMPD1;GSTO1;MMP14;TMEFF2;KCNA1;DCBLD2;LGR6;FADS3;FBXW7;FST;LY6H;AP4S1;GRIA3;TXNDC5;G6PC3;ECE1;PTER;BOC;NEO1;ITGA3;TNFRSF1A;PCDH7;SYT12;ICAM5;FBXO6;PTK7;DDR1;FJX1;ORMDL3;GABBR1;KCNS3;GRINA;PLAT;IGF1R;ADAM11;DNAJB12;SLC41A3;CACNA1A;CACNA1H;GRM7;RALB;AGPAT3;SLIT3;FAHD1;TPBG;MRGPRE;BCAM;ST3GAL5;ST3GAL6;NDFIP1;1700021F05RIK;PPT2;GABRB3;SIAE;GABRA1;…
E2F4-21247883	302	2998	0.174063	0.071274	0.102789	7.05955e-44	-0.700239	69.5753	NUP107;TSKU;NDST2;ASPHD1;DDIT4;PRPF38B;MAGOHB;SFXN4;LGMN;KCNC4;PANX1;GSTO1;SLC7A5;SLC7A8;MMP15;KCNA1;ATL1;SLC7A1;ZSWIM7;SNX19;OLFML2B;PLOD1;FADS3;MAP3K6;DGAT2;CNPY2;APOA1BP;MINPP1;BLM;HSP90B1;TMEM120B;HPS1;ECE1;PTER;ACP2;GRID1;TMBIM4;ADORA2B;TMBIM6;TM6SF1;SORL1;TSPAN14;SYT11;ALG8;ALG9;ALG6;ALG5;ISLR2;TRIM13;TRIM11;BRI3BP;DHRS13;MRPS11;HERPUD1;SDF4;AGTRAP;KIN;TLCD1;FJX1;GBA;PNMA1;PCNX;MGAT2;SORT1;…
RAD21-21589869	224	2036	0.129107	0.0484036	0.080703	2.76205e-37	-0.815068	68.6122	POP4;1110051M20RIK;SFXN4;LGMN;ACHE;KCNC1;CHST8;CHST1;CHST2;SLC7A1;COL3A1;LGR6;FADS3;DGAT2;ATP11B;IL6ST;HTR1A;BOC;NEO1;ACP1;ITGA3;GRID1;TNFRSF21;PCDH8;MFSD2A;EIF1B;SLC45A4;TMEM63B;SLC45A1;SDC3;KCNN1;KCNN2;NRP1;NRP2;TLCD1;FJX1;XDH;SORT1;VEGFC;PCDHB13;PCDHB12;PCDHB11;PCDHB10;PCDHB19;PCDHB16;TCEA2;2610524H06RIK;RPP30;CELSR2;GNPTAB;ENPP5;SIDT1;SIDT2;CACNA1I;SYT4;UBE2S;MANSC1;CNTN3;QRFPR;TMEM201;TMEM20…
FLI1-21571218	537	5834	0.30951	0.138697	0.170813	8.44301e-71	-0.382632	61.7377	NUP107;UNC50;DDIT4;PRPF38B;GSTO1;MMP14;CHST1;ATAD1;SNX14;AGRN;MAP3K6;FBXW7;FBXW2;MINPP1;LY6H;BLM;KCNF1;CLPTM1L;ECE1;PTER;BOC;GRID1;TNFRSF1A;TNFRSF21;HTR5A;TM6SF1;ST7;OCIAD1;SLC23A2;ICAM5;FBXO8;TRIM13;GRIK1;SDF2;MRPS26;AGTRAP;SYP;KIN;FITM2;ORMDL3;GRIN1;NDUFAB1;PLAT;CELSR2;IGF1R;FAM198A;PLAU;DNAJB12;ADAM10;ADAM17;PLD3;TNFAIP6;GRM2;RALB;PSMB10;SLIT3;CCK;CD9;ERCC5;MRGPRE;GJA4;NUP210;WDR73;NCSTN;ST3GA…
NRF2-20460467	134	1055	0.0772334	0.0250814	0.052152	1.34373e-27	-0.984312	60.9037	PGAP1;TSKU;LACTB;CACNA2D1;CACNA2D3;ABCB9;MRPL13;PRRT3;JAG1;FN1;MAGOHB;SLC39A10;TMC6;TMEFF2;PIGK;ATL2;PTGS2;ADAM23;PLXDC2;TSEN2;CNTNAP5A;KCNH3;KCNH5;LRRC4C;TXNDC5;KCNF1;TBXAS1;MCFD2;GRID1;TNFRSF1A;PCDH9;PCDH7;ST7;EPHB3;SEC63;SFRP2;TSPAN3;BRI3BP;EXT1;ECM1;PTPRM;B230118H07RIK;PTPRK;BBS5;CD34;CTSB;SORCS1;SORCS3;RGMA;CRELD1;FJX1;VEGFC;BC017158;ENPP5;UBE4A;NPNT;SLC1A4;KCNV1;LAYN;BMP4;CNTN1;PHTF2;LAMC1;…
NFE2L2-20460467	134	1055	0.0772334	0.0250814	0.052152	1.34373e-27	-0.984312	60.9037	PGAP1;TSKU;LACTB;CACNA2D1;CACNA2D3;ABCB9;MRPL13;PRRT3;JAG1;FN1;MAGOHB;SLC39A10;TMC6;TMEFF2;PIGK;ATL2;PTGS2;ADAM23;PLXDC2;TSEN2;CNTNAP5A;KCNH3;KCNH5;LRRC4C;TXNDC5;KCNF1;TBXAS1;MCFD2;GRID1;TNFRSF1A;PCDH9;PCDH7;ST7;SEC63;EPHB3;SFRP2;TSPAN3;BRI3BP;EXT1;ECM1;PTPRM;B230118H07RIK;PTPRK;BBS5;CD34;CTSB;SORCS1;SORCS3;RGMA;CRELD1;FJX1;VEGFC;BC017158;ENPP5;UBE4A;NPNT;SLC1A4;KCNV1;LAYN;BMP4;CNTN1;PHTF2;LAMC1;…
RUNX1-21571218	469	5071	0.270317	0.120557	0.14976	6.83155e-61	-0.437421	60.5987	CRHBP;HEMK1;UNC5A;CACNA2D3;DDIT4;UNC50;ORAI2;PLBD2;JAG2;JAG1;FXYD5;LGMN;KCNC3;CHST8;CHST1;KCNA2;RIC3;DCBLD1;SNX14;AGRN;LGR6;LGR4;KCNH2;FBXO17;LY6H;BLM;KCNF1;CLPTM1L;ECE1;GRID1;TNFRSF1A;SORL1;ST7;OCIAD1;FBXO8;BTD;TRIM13;SDC3;KCNN1;B4GALNT4;BRI3BP;MRPS11;GRIK4;UIMC1;SDF4;SDF2;MRPS26;AGTRAP;ORMDL3;GRIN1;RIT1;KCNS1;PLAT;IGF1R;FAM198A;FAM3C;DNAJB12;ADAM15;PLD3;SDK1;ZMYND19;GRM8;ATP6AP2;RALB;SLC3A2;NT5…
MYC-19030024	343	3868	0.197695	0.0919573	0.105737	2.66169e-39	-0.66711	59.2539	NUP107;SPINT2;UNC50;SAR1B;RDH11;PRPF38B;JAG1;FXYD6;HYOU1;CHST8;GSTO1;CHST2;ADAM23;ATAD1;LAPTM4A;DGAT2;FBXW2;BLM;AP4S1;G6PC3;CLPTM1L;E2F1;OCIAD1;SLC23A2;ICAM5;FBXO8;SYNGR1;SYNGR2;KCNN2;B4GALNT4;SLC10A7;PTK7;RAB9;GRIK5;MRPS11;HERPUD1;BBS5;KIT;TLCD1;GRIN1;NDUFAB1;IGF1R;ADAM17;ZMYND19;ATP6AP1;SLC3A2;NT5C3;PSMB10;BC004004;ERCC5;ADCY8;SYVN1;WDR12;PLP2;PARK7;IFNAR2;INSIG1;FANCL;DAD1;DNAJB9;IFITM2;SLC35B…
CTCF-18555785	169	1568	0.0974063	0.0372774	0.0601289	3.63123e-27	-0.964052	58.6917	JAG2;FUCA1;CHST7;MMP15;MMP17;SNX19;LGR6;KCNF1;HPS1;IGSF11;TNFRSF21;NTRK2;ALG5;SYNGR1;NEU1;EXT2;DHRS13;GRIK4;SDF4;MRPS26;GAA;TLCD1;PCNX;PCDHB15;PCDHB14;PCDHB13;PCDHB10;PCDHB17;NDUFAB1;PCDHB16;RPP30;GNPTAB;SPOCK1;TPBG;BC004004;MRGPRE;FLRT3;H13;PCDHB5;PCDHB4;PCDHB3;ABCC10;CDC123;HIPK4;G0S2;ANKRD13D;CLU;TNR;PLXNA2;M6PR;LRFN2;CPE;RFC2;DNAJC1;RAB24;DNAJB9;POLR2H;SLC13A5;POLR2J;SLC35B2;SLC35B1;SLC35E4;D…
EED-16625203	106	830	0.0610951	0.0197323	0.0413628	3.4922e-22	-1.13892	56.2697	HTR6;UNC5C;ABCA5;KCNC4;CHST8;CHST7;ELOVL4;TMEFF2;CHST2;KCNA1;KCNA2;SEZ6;FSTL4;DGAT2;NPTX1;KCNF1;HTR1A;CXCL12;CNTNAP1;RASGRF1;BOC;GRID1;SEZ6L;ST6GALNAC5;PPM1L;SLITRK4;PCDH1;NTRK2;NTRK3;PCDH7;PCDH8;SPON1;EPHB1;EPHA5;ENTPD2;KCNK12;EPHA3;ADCYAP1R1;PCDH10;ST8SIA5;KCNN2;NRP1;PTPRU;NRP2;PTPRO;GRIK1;GRIK2;COL19A1;RELN;CAR4;KIRREL3;PDGFRA;SLC30A3;NPNT;SIDT1;CALCA;BMP7;BMP4;BMP3;SDK2;PODXL2;GRM7;SLIT2;HS3S…
HNF4A-19822575	543	6083	0.312968	0.144616	0.168352	2.04214e-67	-0.35985	55.2583	NUP107;CXADR;UNC5C;DDIT4;ORAI3;SAR1B;JAG1;EIF2AK3;KCNC1;KCNC3;GSTO1;TMEFF2;MMP15;MMP17;ADAM22;SNX25;ADAM23;ATAD1;DCBLD1;DCBLD2;SNX14;LGR6;AGRN;LGR4;IL1RAP;LAPTM4A;DGAT2;DGAT1;KCNH7;FBXW2;MINPP1;BLM;AP4S1;ECE1;NEO1;GRID1;TNFRSF1A;SORL1;ST7;SLC23A2;FBXO6;TMEM63B;SDC3;SYNGR1;SYNGR2;NEU1;B4GALNT4;FER1L5;PTK7;FBXL4;GRIK4;GRIK1;GRIK2;HERPUD1;KCNT2;UIMC1;AGTRAP;KIN;ORMDL3;PCNX;SORT1;NDUFAB1;CELSR2;IGF1R…
ERG-20887958	209	1969	0.120461	0.0468107	0.0736504	9.11299e-33	-0.748707	55.2363	ENDOG;ORAI3;EXD2;RDH12;RDH14;FUCA1;FUCA2;EIF2AK3;SMPD1;GSTO1;ATL1;FADS3;NUDT18;CASD1;MINPP1;IL6ST;2510039O18RIK;AP4S1;PTER;ITGA6;TMBIM6;WHAMM;PCDH7;TM6SF1;NAGK;OCIAD1;BSG;FBXO8;ALG8;ALG5;ALG1;EIF1B;TRIM11;NEU1;FBXL4;NRP2;HERPUD1;SDF4;BBS5;TLCD1;MGAT5;MGAT2;GABBR1;VEGFC;MMGT2;ADAM10;PPIB;ODF2L;DHRS7B;TAZ;PHTF1;SUN1;TAPBP;AGPAT5;AGPAT4;SV2A;TMEM208;BC004004;ERCC5;SEH1L;NDFIP2;NDFIP1;ICMT;H13;SQLE;P…
SOX2-18692474	286	3319	0.164841	0.0789055	0.085936	1.97683e-30	-0.779828	53.3372	CACNA2D1;DDIT4;JAG1;CHST8;GSTP2;ADAM23;LGR4;LAPTM4A;2510039O18RIK;KCNJ9;ST7;SLC23A2;FBXO6;BTD;TRIM13;SYNGR1;KCNN1;KCNN2;NTNG1;NTNG2;PTK7;GRIK4;B230118H07RIK;KCNT2;SDF2;AGTRAP;KIT;SORT1;SLC41A3;PLD3;SDK1;RALB;SLC3A2;NT5C3;MRGPRE;ADAMTSL1;NFIB;IFNAR2;FKBP7;IFNAR1;CPE;THBD;DAD1;IFITM1;IFITM2;SLC35B4;SLC35E3;SLC35F2;TMED1;TMED4;MATN2;PDPN;SUSD2;ATP1B1;CPSF4;FGFR1;LRRTM3;TMEM2;CDH10;CDH13;ATP1A1;PDSS1…
TBX5-21415370	213	2296	0.122767	0.0545848	0.0681818	3.42428e-26	-0.904461	53.0343	SPINT2;TSKU;CACNA2D3;TMEM126A;EIF2AK3;TSPO;GSTP2;DCBLD2;CENPP;LGR4;KCNH2;CASD1;TPST1;BLM;HSP90B1;TMEM120B;HPS1;MCFD2;ITGAV;TMBIM4;ITGA6;TSPAN33;HCRTR1;TSPAN13;NAGK;SLC23A2;ALG6;ALG5;CALR;FBXL2;DHRS13;NRP2;GAA;ORMDL3;PCNX;DNAJB12;UBE4A;SLC41A3;CACNA1I;SDK1;DYRK3;TAPBP;MAN1B1;PSMB10;TTC13;ERCC5;GJA4;WDR73;FLRT2;ST3GAL5;ICMT;H13;WDR54;ABCC10;CLDND1;SLC17A5;SIAE;SYVN1;CYP20A1;ANKRD13D;TM7SF2;SLC39A9;…
GATA1-19941827	190	1834	0.10951	0.0436013	0.0659088	1.41621e-28	-0.799932	51.2952	NDST2;HEMK1;ORAI3;1110051M20RIK;SFXN4;ACHE;PANX1;SLC7A5;MMP14;MMP15;CHST1;SLC7A1;LAPTM4A;MAP3K6;NUDT14;MINPP1;BLM;TMEM120B;1600002H07RIK;TBXAS1;ATRN;TSPAN33;PCDH7;NAGA;ICAM5;BSG;ALG2;EXT1;NRP1;ECM1;KIT;TLCD1;RELN;MGAT5;ORMDL3;GABBR2;TCEA2;IGF1R;SIDT1;SLC41A3;CACNA1C;ODF2L;IGF2R;SDK1;SDK2;DYRK3;GRM8;TAPBP;MAN1B1;RALB;NT5C3;AGPAT4;SV2A;TMEM205;FAHD1;TTC13;GALNS;GLA;ST3GAL5;ST3GAL6;ST3GAL3;CDC123;ER…
TCFCP2L1-18555785	196	1987	0.112968	0.0472387	0.0657296	4.8033e-27	-0.818812	49.6204	NUP107;CXADR;UNC50;SFXN4;FXYD5;KCNC4;PANX1;SMPD1;ADAM23;RIC3;SNX14;LGR6;DGAT2;HSP90B1;GRIA4;HPS1;ITGAV;ACP2;TSPAN33;E2F1;PCDH1;KCNJ4;TSPAN14;TSPAN13;KCNK4;FBXO6;MFSD11;TRIM13;B4GALNT4;BRI3BP;EXT1;FBXL4;KCNT2;GAA;KIN;KIT;CANX;GBA;MGAT2;TMEM176B;PDCL3;CELSR2;ADAM17;DNAJB11;CACNA1H;CACNA1G;SYT1;ZMYND19;MAN1B1;RALB;TTC13;BC004004;NUP210;BCAM;ANAPC10;ICMT;FANK1;ELMOD2;GRN;CLDND1;LDLR;NUCB2;IFNAR1;PLXN…
TCFAP2C-20176728	243	2667	0.140058	0.0634049	0.0766527	6.84764e-29	-0.750613	48.6781	ALKBH6;HEMK1;CXADR;CACNA2D3;DDIT4;ASPHD2;JAG2;FUCA1;EIF2AK3;FN1;LGMN;TSPO;SLC39A14;SLC7A8;MMP17;ERGIC2;CHST2;GSTP2;DCBLD1;CENPP;PLOD1;FADS3;MAP3K6;FBXO17;APOA1BP;FBXW2;TPST2;MINPP1;TPST1;IL6ST;ACP2;NEO1;GRID1;ITGA3;ITGA7;PCDH1;KCNJ4;SORL1;SYT11;SLC23A2;FBXO6;ISLR2;EIF1B;TRIM11;SLC45A4;KCNN1;EXT1;EXT2;DDR1;NRP2;KCNT1;KIN;CANX;GBA;PNMA1;MGAT5;ORMDL3;PLAT;ADAM10;CACNA1B;SHARPIN;PHTF1;RER1;SLC3A2;GAL…
POU5F1-18692474	347	4233	0.2	0.100635	0.0993652	2.14325e-33	-0.61816	46.4998	NUP107;CACNA2D1;DDIT4;JAG2;JAG1;LGMN;KCNC3;CHST8;ADAM23;ATAD1;LGR4;KCNH5;2510039O18RIK;GRIA3;KCNJ9;ST7;SLC23A2;TRIM13;SYNGR1;KCNN1;B4GALNT4;NTNG1;PTK7;FBXL6;GRIK4;KCNT2;SDF2;AGTRAP;KIT;ORMDL3;SORT1;DNAJB12;PLD3;GRM8;SYNGR3;RALB;SLC3A2;NT5C3;CD9;MRGPRE;WDR44;G0S2;NFIB;PLP2;FKBP7;IFNAR1;OSBPL2;THBD;GAL3ST3;THA1;SLC35A2;SLC35B2;IFITM1;IFITM2;NFU1;SLC35A5;LIAS;SLC35E3;SLC35F2;TMED9;PDPN;SUSD2;FGFR1;L…
RNF2-16625203	131	1219	0.0755043	0.0289803	0.046524	4.20543e-21	-0.957539	44.9257	HTR6;CACNA2D3;UNC5C;KCNC4;PANX1;CHST8;CHST7;ELOVL4;SLC39A10;SLC39A14;TMEFF2;MMP16;CHST2;KCNA1;SEZ6;DCBLD2;PLOD2;PLOD1;DGAT2;FST;NPTX1;KCNF1;BDNF;HTR1A;IGSF11;CXCL12;CNTNAP1;RASGRF1;BOC;EDIL3;GRID1;SEZ6L;ADORA2B;PPM1L;PCDH1;NTRK3;PCDH7;PCDH8;SPON1;EPHA5;EPHA7;ENTPD2;KCNK12;SFRP2;ADCYAP1R1;PCDH10;NRP1;PTPRU;NRP2;PTPRS;GRIK1;GRIK2;PCSK5;MC4R;COMMD3;COL19A1;RELN;KCNS3;IGF1R;CAR4;KIRREL3;PDGFRA;SLC30A…
MYC-18358816	290	3413	0.167147	0.0811402	0.0860068	6.18987e-30	-0.609288	40.9774	NUP107;SPINT2;HEMK1;UNC50;RDH11;JAG2;PRPF38B;HYOU1;GSTO1;GSTP2;ATAD1;LGR6;LAPTM4A;MAP3K6;DGAT2;FBXW2;BLM;G6PC3;TNFRSF21;OCIAD1;SLC23A2;ICAM5;FBXO8;KCNQ5;KCNN2;BRI3BP;FBXL6;GRIK5;HERPUD1;SDF4;KIN;KIT;GRIN1;DNAJB12;NDUFB11;ZMYND19;SYNGR3;SLC3A2;NT5C3;PSMB10;SLIT2;CCS;BC004004;WDR12;PARK7;DNAJC1;DNAJB9;IFITM2;SLC35B1;SLC35C2;IFRD1;CPT1C;LIAS;SLC35E4;SLC35E3;SLC35F2;SLC35F5;TMED3;TMED1;TMED5;TMED9;ZD…
CREB1-20920259	287	3057	0.165418	0.0726767	0.0927412	1.8752e-36	-0.47311	38.9201	POP4;UNC5A;ASPHD1;UNC50;DDIT4;ASPHD2;EXD2;PRPF38B;FN1;EIF2AK3;L1CAM;MAGOHB;HYOU1;SLC39A14;ATL2;ATAD1;DGAT1;CNPY3;FBXW2;TPST2;MBIP;KDSR;TXNDC5;TMEM120B;HPS1;CLPTM1L;ELFN1;SEZ6L;ADAMTS20;ATRN;TMBIM6;TNFRSF21;LRTM2;E2F1;NAGA;HTR5A;NAGK;SST;OCIAD1;BSG;OMG;KCNQ5;SYNGR2;NEU1;B4GALNT4;EXT1;CALR;FBXL6;CRTAC1;BBS5;GAA;CANX;RELN;ORMDL3;PDCL3;NEK11;RPP30;ENPP5;DNAJB12;UBE4A;DNAJB11;SIDT2;CACNA1A;CACNA1I;ODF…
PPARD-21283829	322	3447	0.185591	0.0819485	0.103642	8.29704e-41	-0.41377	38.1869	ALKBH6;DDIT4;ORAI3;ORAI2;RDH14;KCNC4;MMP16;CHST1;ADAM22;SNX19;IL1RAP;EFEMP1;KCNH2;FBXW7;FBXW2;MINPP1;CLPTM1L;NEO1;HTR3A;TNFRSF1A;ADAMTS20;TNFRSF21;TM6SF1;SORL1;BSG;MRPS11;KCNT1;KCNT2;BBS5;KIT;ORMDL3;KCNS3;NEK11;GRINA;FAM3A;CNTN6;SDK1;TAZ;GRM7;SUN1;SV2B;SLIT1;NDFIP1;SLC17A5;IL10RB;SYVN1;NFIB;CLU;IFNAR1;INSIG1;DNAJC1;VEZT;SLC35B4;SYNPR;IFRD1;WBSCR17;SLC22A5;STXBP2;ADCK2;TMED2;ZDHHC17;MATN2;AMIGO2;S…
PPARG-20887899	321	3565	0.185014	0.0847538	0.100261	9.07005e-38	-0.447546	38.1727	NUP107;DDIT4;RDH14;PRPF38B;JAG1;GSTO1;GSTP2;ADAM23;LGR4;FADS3;LAPTM4A;EFEMP1;DGAT2;FBXW2;MINPP1;1600002H07RIK;ECE1;BOC;TNFRSF1A;DRAM2;BTD;SYNGR1;KCNN1;ORMDL3;PDCL3;GNPTAB;DNAJB12;ADAM17;SLC3A2;PSMB10;SLIT3;CD9;ERCC5;FANK1;ADCY8;SLC17A5;SYVN1;G0S2;NFIB;JKAMP;FKBPL;IFNAR1;LYZ2;INSIG1;IFITM2;SLC35B1;SLC35A5;IFRD1;SLC22A5;TMEM184B;SLC35E4;ADCK2;TMED2;ZDHHC17;MATN2;MTX2;QPCT;BMPER;LPL;BAMBI;FGFR1;H2-T…
SCL-21571218	185	1784	0.106628	0.0424126	0.0642157	7.16996e-28	-0.584296	36.5199	DDIT4;JAG2;FXYD5;CHST8;ERGIC3;KCNB2;WNT7B;CENPP;LGR6;KCNG2;IL1RAP;MAP3K6;TPST2;MINPP1;IL6ST;HHATL;TBXAS1;ECE1;ELFN1;GRID1;ATRN;NTRK3;SORL1;TSPAN14;ST7;OCIAD1;ICAM5;BSG;ADCYAP1R1;EXT1;NRP2;GRIK4;WFDC1;GRIK1;UIMC1;MRPS26;KIT;IGF1R;FAM198A;DNAJB12;IGF2R;DYRK3;AGPAT5;RALB;AGPAT4;SLIT3;CD9;GJA4;ATG10;LRPAP1;NDFIP1;GABRB3;WDR44;TIMP2;ADCY2;LDLR;GABRA3;SMOC2;DHRS7;INSIG1;PLXNA4;TMEM132C;TMEM132B;DNAJB9;…
SOX17-20123909	185	1947	0.106628	0.0462877	0.0603405	7.9002e-24	-0.679608	36.1519	FUCA1;GSTO1;SLC39A10;SLC39A14;SLC7A5;LAPTM4A;CASD1;MINPP1;GRIA4;1600002H07RIK;IGSF11;TBXAS1;CLPTM1L;BOC;ACP2;ACP1;TNFRSF21;ST7;SLC23A2;ISLR2;KCNN2;NRP1;NRP2;SDF4;BBS5;PDCL3;PCDHB17;PCDHB16;PLAT;CAR4;SYT3;AGPAT4;SV2B;SPOCK1;TRDMT1;XYLT2;ATG10;LRPAP1;FLRT2;FLRT3;ST3GAL6;NDFIP1;H13;SQLE;ADCY8;FKBP7;IFNAR1;FANCL;P4HA1;LEPROT;RAB24;POLR2K;CCDC58;P2RX4;PPIL3;IFITM2;SLC35B4;SIL1;FUT10;UGCG;TRPM2;ROBO2;S…
ESRRB-18555785	148	1434	0.0853026	0.0340917	0.0512109	3.32187e-22	-0.729805	36.0935	NDST2;CRHBP;XYLB;ENDOG;ASPHD2;RETSAT;ABCB8;ABCB9;CYB5R1;RDH14;CADM2;MRPL34;PIGX;CHST8;SIRT3;MMP15;TMEM106B;TMEM70;RABAC1;ATAD1;PLXDC1;CTGF;DGAT1;ATP11B;TPST2;SLC27A4;AP4S1;HTR1A;CXCL12;TMEM11;MCFD2;COX4I1;EDIL3;NDUFB8;SYT13;TM6SF1;SLC23A2;ZDHHC5;TXNDC11;PTGFRN;SCN1B;PAQR7;ZFP1;SDC3;SYNGR1;CTSA;NTNG2;BRI3BP;DDR1;CTSZ;CTSB;GAA;CANX;TLCD1;GPC1;PCNX;NDUFAB1;CYP46A1;PLAU;NXPH3;FUT8;DHRS7B;CRTAP;MANSC1…
FOXA2-19822575	277	2968	0.159654	0.0705608	0.0890934	1.02861e-34	-0.451185	35.3096	TSKU;CXADR;CACNA2D3;DDIT4;JAG1;EIF2AK3;FN1;SFXN4;KCNC1;GSTO1;SLC39A14;SLC7A8;ERGIC3;ATL2;ADAM22;SNX25;GOLM1;KCNB2;DCBLD1;SNX14;LGR6;LGR4;IL1RAP;FADS3;NUDT18;DGAT2;KCNH7;FBXW7;FST;FBXO17;CNPY3;CASD1;FBXW2;TPST1;MINPP1;AP4S1;TXNDC5;G6PC3;TBXAS1;CLPTM1L;ECE1;ACP2;ACP1;ITGA3;SEZ6L;ATRN;ITGA6;SORL1;ST7;SLC23A2;ALG9;MFSD11;SLC45A4;FER1L5;EXT1;PTK7;FBXL4;DDR1;NRP1;NRP2;HERPUD1;KCNT2;CRTAC1;MRPS26;KIN;RE…
NANOG-18692474	260	3052	0.149856	0.0725578	0.0772981	7.16726e-27	-0.577517	34.7667	CACNA2D1;DDIT4;JAG1;EIF2AK3;FN1;SMPD1;CHST8;SLC39A14;GSTP2;KCNA2;SLC7A3;ADAM23;SPP1;WNT7B;CRLF1;LGR4;PLOD1;FBXO17;ATP11B;CASD1;IL6ST;LY6H;BLM;2510039O18RIK;TXNDC5;TBXAS1;ITGB8;ITGAV;ITGA6;NTRK2;KCNJ9;PTGFRN;ALG8;TRIM13;SLC45A4;SLC45A1;KCNN1;EXT1;FBXL6;DDR1;NRP2;CRTAC1;SDF2;AGTRAP;KIT;VEGFC;TCAP;ADAM17;PPIH;CACNA1I;DHRS7B;CRTAP;SYT3;UBE2S;PHTF2;DYRK3;RALB;SLC3A2;AGPAT4;SLIT2;CD9;MRGPRE;ATG10;LRPAP…
TAL1-20566737	186	1875	0.107205	0.044576	0.0626286	6.23209e-26	-0.577601	33.5225	NDST2;HTR6;DDIT4;ORAI3;UNC50;FUCA2;HYOU1;LGMN;SMPD1;SLC7A5;CHST1;ERGIC3;SNX14;AGRN;IL1RAP;FADS3;LAPTM4A;MAP3K6;FBXW7;MINPP1;BLM;HSP90B1;TMEM120B;1600002H07RIK;TBXAS1;SYT13;BSG;ALG2;ISLR2;SLC45A4;SYNGR1;SYNGR2;B4GALNT4;EXT1;NRP2;KIT;EEF1E1;RELN;PNMA1;ORMDL3;GABBR2;GRINA;IGF1R;FAM3C;DNAJB12;SHARPIN;NT5C3;AGPAT4;TMEM205;SPOCK1;FAHD1;CD9;IGTP;ST3GAL5;ST3GAL6;NDFIP1;ADAMTSL1;LDLR;TM7SF3;PLXNC1;IFNAR2;…
TP53-20018659	124	1123	0.0714697	0.026698	0.0447717	6.72348e-21	-0.719908	33.4388	TSKU;DDIT4;RETSAT;RHBDL1;TMEM43;CHST2;KCNA1;KCNA2;CSMD1;WNT7B;PLXDC2;CRLF1;PLOD2;LAPTM4A;NUDT18;FBXW7;FST;IGSF21;NPTX1;GRIA3;GRIA4;HTR1A;RASGRF1;GRID1;SEZ6L;PPM1L;SLITRK5;PCDH1;CNNM4;KCNJ4;NTRK2;PCDH7;NTRK3;PCDH8;NELL2;NELL1;OCIAD1;MDGA2;SPON1;EPHB1;SLC12A7;EPHA7;ISLR2;KCNQ5;TRIM11;TMEM63B;PCDH10;SLC45A1;SCN3B;NTNG1;NTNG2;PTK7;DDR1;PTPRU;PTPRS;COMMD3;SORCS3;CANX;RELN;GPC1;GRINA;PDGFRA;SLC30A3;SID…
CCND1-20090754	193	2137	0.111239	0.0508047	0.0604344	1.66963e-22	-0.666162	33.4042	ALKBH6;DDIT4;FN1;EIF2AK3;TBL2;HYOU1;LGMN;SLC39A10;ERGIC3;WNT7B;LAPTM4A;NUDT18;MAP3K6;BLM;ITGA3;PCDH7;ICAM5;FBXO8;ALG2;ISLR2;BTD;SYNGR1;KCNN2;DDR1;NRP1;GRIK5;HERPUD1;MC4R;SDF2;TLCD1;ORMDL3;PDCL3;IGF1R;DNAJB12;UBE4A;DNAJB11;SLC41A3;SHARPIN;SYT1;TAZ;MAN1B1;RALB;SLC3A2;NT5C3;PSMB10;AGPAT4;FAHD1;GLA;ANAPC10;PPT2;GRN;SYVN1;G0S2;WDR12;NUCB2;AUP1;INSIG1;PLXNA2;M6PR;LRFN4;TPP1;EMILIN1;GAL3ST3;PLA2G12A;BPG…
SOX2-20726797	226	2564	0.130259	0.0609562	0.0693032	4.58912e-25	-0.595561	33.3758	SPINT2;ALKBH6;ASPHD1;DDIT4;JAG1;FUCA1;FN1;L1CAM;FXYD6;PANX1;SLC39A14;SLC7A5;SLC7A8;SLC7A1;SNX25;DCBLD2;LGR6;AGRN;LGR4;PLOD2;LAPTM4A;DGAT1;FBXO17;TPST2;TPST1;IL6ST;MBIP;MCFD2;PTER;ITGB8;ITGAV;ITGA3;TMBIM4;TNFRSF21;TM6SF1;TSPAN14;BSG;SLC45A4;EXT1;FBXL2;NRP2;TLCD1;FJX1;GABBR1;TCEA2;IGF1R;PLAU;FAM3A;FAM3C;ADAM10;ADAM17;SYT1;MANSC1;DYRK3;ATP6AP1;ATP6AP2;TAPBP;AGPAT5;RALB;HS3ST1;GALNS;GNS;FLRT3;ST3GAL5…
NR0B1-18358816	167	1691	0.0962536	0.0402016	0.056052	3.93493e-23	-0.627893	32.3927	DDIT4;UNC50;FN1;SLC39A14;MMP14;GSTP2;SLC7A3;SPP1;LGR6;KCNH2;KCNH3;KCNH7;ATP11B;IL6ST;KCNF1;TBXAS1;ITGAV;PCDH1;PCDH8;SLC23A2;FBXO6;PTGFRN;ISLR2;KCNN1;CALR;FBXL6;NRP1;AGTRAP;KIN;KIT;GABBR1;VEGFC;PCDHB13;PCDHB12;PDCL3;KCNS3;IGF2R;PHTF2;DYRK3;SYNGR3;MAN1B1;SLC3A2;SLIT2;FAHD1;ATG10;BCAM;FLRT3;ICMT;GRN;G0S2;NFIB;PARK7;EMILIN1;THA1;IFITM1;IFITM2;SLC35F2;SPPL3;DNER;TLR3;PDPN;SUSD2;COMT;TMEM38A;ATP1B1;CDH…
CNOT3-19339689	153	1547	0.0881844	0.0367782	0.0514063	2.69049e-21	-0.655505	31.0477	CACNA2D3;UNC50;KCNC3;SMPD1;CHST8;MMP15;ERGIC2;CHST2;SLC7A1;PLOD1;MAP3K6;DGAT1;2510039O18RIK;IGSF21;ITGAV;ADAMTS20;TMBIM4;TNFRSF21;ICAM5;FBXO8;ALG5;KCNN2;NTNG2;FBXL4;SDF4;MRPS26;KIN;KIT;ORMDL3;PCDHB13;PCDHB12;PPIB;CRTAP;SDK2;ZMYND19;ATP6AP2;RER1;SPOCK2;SEH1L;1700021F05RIK;GNPTG;PAM;ADCY2;GABRA5;SLC39A6;PLXNC1;NSG1;CPE;EMILIN1;DNAJC1;POLR2H;PPIL3;VEZT;SLC35B1;SLC35A5;IFRD1;COL18A1;SLC35F5;DNER;TMED…
NANOG-18347094	177	1908	0.102017	0.0453605	0.0566568	8.61551e-22	-0.613467	29.7552	CACNA2D1;DDIT4;JAG1;EIF2AK3;KCNC4;SMPD1;CHST8;SLC39A10;SLC39A14;SLC7A8;SLC7A3;SPP1;LGR4;KCNH7;ATP11B;IL6ST;GRIA3;ITGB8;ITGAV;ADORA2B;NTRK2;PCDH8;NAGK;PTGFRN;SLC45A4;KCNN2;EXT1;PTK7;DDR1;CRTAC1;AGTRAP;KIT;VEGFC;ADAM17;PHTF2;DYRK3;GRM8;TAPBP;AGPAT5;SLIT2;FAHD1;ATG10;LRPAP1;ANAPC10;FLRT3;ICMT;PPT1;COQ10A;NFIB;FKBPL;THOC7;FCGR1;TMEM132D;CCDC58;IFITM1;IFITM2;DAG1;POR;CASZ1;ROBO2;COL18A1;SLC35F2;SPPL3;…
GATA1-21571218	243	2601	0.140058	0.0618358	0.0782218	2.30761e-30	-0.406328	27.7284	NDST3;HEMK1;UNC5A;CACNA2D3;DDIT4;VOPP1;JAG2;HYOU1;FXYD5;SLC7A5;ATL2;KCNA2;SLC7A1;ZSWIM7;DCBLD2;CENPP;IL1RAP;KCNH2;MINPP1;IL6ST;TXNDC5;TMEM120B;TBXAS1;MCFD2;ADORA2B;ITGA6;FYB;PCDH1;PCDH9;PCDH7;TSPAN14;ICAM5;BSG;TRIM13;KCNQ5;SLC45A4;SDC3;B4GALNT4;NTNG2;PTK7;GRIK1;AGTRAP;KIT;PCNX;PDCL3;IGF1R;GNPTAB;DNAJB12;ADAM11;PLD3;ODF2L;SHARPIN;CAV2;IGF2R;DEGS1;SDK2;PHTF2;DYRK3;AGPAT5;NT5C3;AGPAT3;SLIT3;NUP210;A…
PAX3-FKHR-20663909	120	1063	0.0691643	0.0252716	0.0438926	5.91506e-21	-0.573257	26.7005	SPINT2;MRPL13;CADM2;EDEM1;GRIN2B;CHST8;SUMF1;TMEFF2;ATAD1;KCNB2;PLXDC2;PLXDC1;GPR61;KCNH7;FST;ATP11B;DSEL;LRRC4C;NPTX2;GRIA3;PTPRD;POMT2;ITGB8;ATRN;MET;SLITRK5;NDUFA4;PCDH7;NELL1;MDGA2;PTGFRN;EPHB2;EPHA4;EPHA7;PCDH10;SLC45A1;SDC3;SLC10A7;LRRN2;PCSK2;NRP2;PTPRR;GRIK2;QSOX1;SORCS1;RGMA;RELN;CREG2;PCNX;CD55;PCDHB14;VEGFC;PLAT;IGF1R;KIRREL3;SEL1L;BMP7;LAMC1;ACVR2A;LNX1;CD9;MBTPS2;WSB1;NUP210;ASTN2;FL…
SFPI1-20887958	225	2369	0.129683	0.0563203	0.0733627	5.68019e-29	-0.376862	24.5103	WLS;ENDOG;UNC50;ORAI3;RDH14;EIF2AK3;HYOU1;KCNC3;SMPD1;ERGIC3;ATL1;NUDT18;TPST2;MINPP1;TMEM120B;G6PC3;ELFN1;PTER;ITGAV;TNFRSF1A;ATRN;TMBIM6;ITGA6;WHAMM;NAGK;BSG;ALG5;ALG1;TRIM11;FBXL4;KIN;TLCD1;MGAT2;GABBR1;VEGFC;PDCL3;TCEA2;SYS1;PLAT;DNAJB12;ADAM10;DNAJB11;PPIB;SLC41A3;CACNA1G;SUN1;TAPBP;TMEM214;AGPAT5;AGPAT4;TMEM203;SV2A;TMEM206;TMEM208;ERCC5;SEH1L;ANAPC10;ICMT;H13;CLDND1;SIAE;KIDINS220;OSTM1;CY…
PHC1-16625203	101	922	0.0582133	0.0219195	0.0362938	5.17097e-17	-0.635758	23.8415	HTR6;CACNA2D3;UNC5C;ABCB8;KCNC4;CHST8;CHST7;GSTO1;TMEFF2;MMP16;CHST2;KCNA1;DGAT2;FST;NPTX1;GRIA3;BDNF;HTR1A;CXCL12;CALR3;CNTNAP1;RASGRF1;BOC;EDIL3;GRID1;SEZ6L;TNFRSF1A;AU040320;PPM1L;PCDH1;NTRK2;NTRK3;PCDH7;PCDH8;MERTK;SPON1;EPHA5;EPHA7;KCNK12;SFRP2;PCDH10;NRP1;PTPRU;NRP2;PTPRM;GRIK2;PCSK5;SDF4;SORCS3;CD44;COL19A1;RELN;KCNS3;KIRREL3;PDGFRA;SLC30A3;ADAM10;NPNT;SIDT1;BMP7;BMP4;SLIT2;HS3ST1;COL12A1;…
PRDM14-21183938	187	1944	0.107781	0.0462164	0.0615646	1.20554e-24	-0.414755	22.8427	CACNA2D1;DDIT4;RDH14;FN1;FXYD6;NINL;CHST8;CHST7;SLC7A5;TMEFF2;ATL2;SPP1;DCBLD1;SNX14;GM14410;IL6ST;2510039O18RIK;IGSF21;MBIP;AP4S1;TMEM120B;ELFN1;BOC;ITGA6;TNFRSF21;TSPAN33;PCDH7;NTRK3;SYT13;TM6SF1;TSPAN14;SLC23A2;BTD;SYNGR1;NEU1;SLC10A7;EXT1;DDR1;NRP2;GRIK2;KCNT2;CRTAC1;BBS5;AGTRAP;KIT;FITM2;MGAT5;PCNX;IL34;KCNS3;CACNA1B;SYT5;SYT3;SDK1;DYRK3;ATP6AP2;AGPAT3;SPOCK1;TMEM208;CD9;BCAM;LRPAP1;ANAPC10;…
ZFP281-18757296	180	2004	0.103746	0.0476428	0.0561036	8.82839e-21	-0.480794	22.2013	HTR6;CXADR;DDIT4;FXYD6;KCNC3;MMP14;MMP15;MMP17;CHST2;CRLF1;KCNH2;FST;IGSF21;AP4S1;GRIA3;HPS1;HTR1A;SPRN;ECE1;PTER;NEO1;ITGA3;PCDH1;PCDH7;PCDH8;HTR5A;HCRTR1;ALG2;TMEM63B;PTK7;CALR;NRP1;GRIK5;HERPUD1;FJX1;RELN;ORMDL3;GABBR1;NDUFAB1;GRINA;DNAJB12;ADAM15;CACNA1H;CACNA1G;SYT3;TNFAIP6;ZMYND19;SYNGR3;SLC3A2;AGPAT4;TPBG;GALNS;BCAM;ASTN1;H13;ADCY8;GABRA3;G0S2;OSTM1;NFIB;TMEM39B;PLP2;PARK7;SLC39A1;LRFN1;TP…
TP53-18474530	99	827	0.0570605	0.019661	0.0373995	4.94689e-19	-0.480563	20.2559	DDIT4;JAG1;COL1A1;SLC39A14;TMEFF2;CSMD1;SNX19;CPA2;KCNH5;FST;GRIA1;DSE;ADAMTS20;ADORA2B;ITGA6;ST6GALNAC5;LINGO2;NTRK2;PCDH7;SYT16;TSPAN14;OCIAD1;OGFOD2;PTGFRN;EPHB2;SLC12A7;EPHA5;EPHA4;EPHA3;ZBED5;SLC10A7;CALR;SCN2A;CD200;PCSK2;NRP1;PTPRU;NRP2;PTPRM;GRIK2;SORCS3;RGMA;MGAT5;GPC3;PCNX;CD83;FAM3A;PSEN2;CACNA1C;BMP7;DYRK3;MMP2;MBTPS1;MRGPRE;SSR1;ST3GAL5;ADAMTSL1;PRSS12;DHRS7;DGKE;TM7SF3;CDH8;TNR;IGFB…
JARID1A-20064375	202	2171	0.116427	0.0516131	0.0648135	5.58845e-25	-0.357769	19.9792	NUP107;POP4;HEMK1;TMEM126A;SAR1B;MAGOHB;ERGIC2;ADAM23;CENPP;FBXW2;2510039O18RIK;MBIP;1600002H07RIK;CLPTM1L;ACP2;OCIAD1;ALG8;ALG1;MFSD11;TRIM11;CALR;MRPS11;SDF4;SDF2;KIN;GBA;OS9;PNPLA7;RPP30;UBE4A;DNAJB11;CACNA1A;PLD3;SHARPIN;PODXL2;TAZ;TMEM222;TAPBP;RER1;TMEM216;MAN1B1;TMEM208;FAHD1;TTC13;GALNS;BC004004;ANKLE2;ANAPC10;H13;GNPTG;PPT1;TCTN2;ELMOD2;GRN;CDC123;SYVN1;PARK7;AUP1;SLC39A6;CLCC1;FKBPL;TPP…
MYCN-18555785	198	2261	0.114121	0.0537527	0.0603683	1.16387e-21	-0.411356	19.8284	FN1;NR2F6;TBL2;HYOU1;SLC7A5;ERGIC3;ATAD1;CENPP;DGAT2;FBXW2;G6PC3;CLPTM1L;MCFD2;E2F1;SORL1;OCIAD1;BSG;FBXO8;ALG6;ALG5;ALG1;MFSD11;EIF1B;UGT8A;B4GALNT4;SLC10A7;EXT2;DHRS13;HERPUD1;SDF4;KIN;KIT;ORMDL3;MGAT2;PNPLA7;NDUFAB1;TCEA2;NEK11;GNPTAB;ADAM17;DNAJB11;NDUFB11;PLD3;SYT5;UBE2S;DYRK3;ZMYND19;MAN1B1;AGPAT5;TTC13;BC004004;NUP210;ANAPC10;PAM;ABCC10;GRN;CDC123;SLC17A5;GABRA5;OSTM1;PARK7;SLC39A6;IFNAR1;…
KLF4-18358816	158	1700	0.0910663	0.0404156	0.0506507	1.38758e-19	-0.39056	16.9587	CACNA2D3;FN1;L1CAM;PANX1;TSPO;SLC39A14;SLC7A5;MMP14;TMEFF2;GSTP2;SPP1;LAPTM4A;KCNH2;KCNH3;KCNH7;IL6ST;IGSF21;ITGA3;TMBIM4;PTGFRN;ALG9;ISLR2;TMEM63C;B4GALNT4;CALR;SDF4;AGTRAP;KIT;TLCD1;GABBR1;VEGFC;PDCL3;KCNS3;PPIB;CACNA1A;CRTAP;DYRK3;SYNGR3;TAPBP;MAN1B1;AGPAT5;RALB;SLC3A2;FAHD1;BC004004;CD9;FLRT2;CYP20A1;IFNAR2;EMILIN1;LEPROT;PPIL3;IFITM1;IFITM2;IFRD1;STXBP2;ZNHIT1;TRPM4;SLC35F2;SLC35F5;GFRA2;NFY…
SETDB1-19884255	180	2020	0.103746	0.0480232	0.0557232	1.90184e-20	-0.371912	16.8881	NUP107;ASPHD2;EIF2AK3;NR2F6;HYOU1;KCNC4;PANX1;CHST8;CHST7;GSTO1;SLC39A10;MMP15;ERGIC2;WNT7B;PLOD2;KCNH5;FBXW2;IGSF21;TNFRSF1A;ITGA7;ITGA6;KCNJ4;PCDH9;PCDH8;ICAM5;FBXO6;ALG2;KCNQ5;SYNGR1;SYNGR2;EXT2;FBXL4;WFDC1;SYP;GABBR1;TCEA2;2610524H06RIK;CELSR2;IGF1R;PODXL2;ATP6AP2;PSMB10;AGPAT4;TTC13;TPBG;CD9;NUP210;ASTN2;1700021F05RIK;H13;WDR54;ABCC10;COQ10A;GRN;GRP;ADCY8;LDLR;HIPK4;PLP2;TM7SF3;SLCO2B1;LRFN3…
EOMES-21245162	106	932	0.0610951	0.0221572	0.0389379	7.65975e-19	-0.386522	16.123	TMEM97;TSKU;NDST2;STARD3;EXD2;CYB5R1;RDH11;RHBDL1;B3GALNT1;FN1;NIPA1;SLC7A5;SEZ6;TMEM57;PLOD2;SAT2;HNMT;EFEMP1;DGAT2;CNPY3;IL6ST;IGSF21;GRIA3;BDNF;PTPRD;PTPRE;TMEM11;CNTNAP1;NEO1;NPC2;NTRK3;PCDH7;PCDH8;MBOAT2;NELL2;ST7;MDGA2;ZDHHC5;FBXO6;EPHB2;ZMPSTE24;ACER3;NRP1;DHRS13;NRP2;RGMA;CD47;TLCD1;ORMDL3;YIPF1;PLAU;PSEN1;FUT8;BMP4;DEGS1;SV2B;GLB1;GCSH;NHLRC3;GLCE;ASTN2;TMEM199;COQ10A;CLSTN1;CDH8;TM7SF2;…
POU3F2-20337985	157	1702	0.0904899	0.0404631	0.0500268	3.48546e-19	-0.363765	15.4602	NDST3;CXADR;CACNA2D1;FN1;TMEFF2;ADAM22;SLC7A1;SPP1;ATAD1;KCNB2;DCBLD2;COL3A1;SNX14;LGR4;KCNH7;FBXW7;ATP11B;IL6ST;MBIP;HTR1F;HTR1A;IGSF11;ITGB8;NEO1;ADAMTS20;PCDH9;SST;OCIAD1;FBXO8;OMD;OMG;KCNQ5;KCNN2;NRP1;GRIK2;MC4R;KIN;EEF1E1;RELN;PCDHB10;ENPP5;ADAM10;KCNV1;SYT4;SYT1;CNTN1;PHTF2;GRM8;NT5C3;AGPAT4;SLIT2;TRDMT1;PCDHB4;PCDHB3;GABRB1;ADAMTSL1;SLC17A8;GABRA2;GABRA1;NFIB;SLC39A9;FKBP7;FANCL;SLC4A10;P4…
GFI1B-20887958	179	1871	0.10317	0.0444809	0.0586891	2.30115e-23	-0.285976	14.9068	UNC50;ORAI3;DDIT4;SAR1B;RDH14;JAG2;TBL2;TSPO;CHST8;SLC7A8;MMP15;ATL1;CASD1;MINPP1;CLPTM1L;HTR3A;TMBIM4;TNFRSF21;PCDH7;NAGK;ST7;MOGS;EIF1B;TRIM11;CALR;DHRS13;SDF4;KIN;KIT;MGAT5;MGAT2;PDCL3;MMGT2;DNAJB12;ADAM10;PPIB;ODF2L;AGPAT5;RSPH9;TMEM206;FAHD1;ERCC5;ANKLE2;SEH1L;ANAPC10;NDFIP1;H13;CYP20A1;IFNAR1;INSIG1;FANCL;OSBPL2;DENND3;LMF1;POLR2F;POLR2H;POLR2J;P2RX4;SLC35B2;CPT1C;POR;FUT10;ATP6V0A1;ADCK2;S…
DNAJC2-21179169	101	899	0.0582133	0.0213727	0.0368406	1.11221e-17	-0.358043	13.9772	NUP107;ISLR;ASPHD2;GRIN2B;EVC2;TMEM62;LRG1;CRLF1;GPR68;PLOD2;CXCL14;FRMD3;MAG;OLFM2;GRIA4;TXNDC5;KCNF1;CNTNAP2;RASGRF1;BOC;ITGB8;ACP2;EDIL3;ATRN;SLITRK4;PCDH1;KCNJ4;NTRK2;SLC12A5;KDELR1;ALG8;PAQR7;SDC3;UBE2J2;SYNGR2;TSPAN7;SLC10A7;PTK7;PCSK2;DHRS13;GRIK5;SORCS3;CD47;FJX1;CCDC107;PNMA1;PCNX;PCDHB12;KCNS1;ZDHHC9;RAMP1;CD83;CYP46A1;ADAM15;SLC1A4;CNTN1;PODXL2;VGF;ATP2B3;GPR162;TMEM178;GAS6;GRAMD4;HIP…
NANOG-16518401	228	3520	0.131412	0.083684	0.0477281	4.20189e-11	-0.511526	12.2218	NUP107;CXADR;CACNA2D1;CACNA2D3;UNC5C;DDIT4;EIF2AK3;CHST7;MMP14;CHST1;ADAM23;ATAD1;DCBLD1;FBXO17;ATP11B;MBIP;GRIA3;GRIA4;BOC;KCNJ9;SLC23A2;BTD;SYNGR1;FBXL2;GRIK2;SDF2;PCNX;KCNS3;GRINA;CELSR2;IGF1R;SDK1;CNTN3;SDK2;TNFAIP6;SLIT3;CCS;CD9;GJA4;NDFIP1;ADCY8;WDR12;OSTM1;NFIB;IFNAR1;SLC4A10;CPE;DNAJC3;COCH;SLC35A2;IFITM1;IFITM2;SLC35B4;SLC35F2;SLC35F5;CYP7B1;BMPER;ATP1B1;FGFR1;H2-T23;LRRTM4;TMEM2;CDH12;N…
KLF1-20508144	120	1144	0.0691643	0.0271973	0.041967	1.15067e-18	-0.267071	11.0317	TSKU;VOPP1;SAR1B;CADM3;ABCA3;ACHE;TMEFF2;GSTP2;FSTL4;WNT7B;PLXDC2;PLXDC1;CXCL14;CNTNAP5A;KCNH7;ATP11B;SLC9A8;PTPRD;TBXAS1;CALR3;CNTNAP2;TNFRSF21;LRRC8C;SLITRK5;BEND5;NTRK2;NTRK3;TSPAN14;TBATA;ZDHHC6;EPHA4;SLC45A1;KCNN1;B4GALNT4;LRRN3;EXT1;ACER3;CALR;DDR1;CTSS;KCNT1;CTSB;SORCS1;CD47;DERL1;PNPLA7;DOHH;GRIN1;BC017158;GRINA;PDGFRA;DNAJB12;ADAM10;TMX1;SIDT1;SLC1A4;PLD3;SYT1;OSTC;SUN1;NT5C3;AGPAT4;FAM1…
SOX2-18358816	87	785	0.0501441	0.0186625	0.0314816	4.33064e-15	-0.332741	11.0048	CACNA2D1;JAG1;FN1;GPR19;MESDC2;SLC39A14;SEZ6;SLC7A3;SPP1;PLXDC1;TMEM57;CTGF;LAPTM4A;SLC9A2;IL6ST;PORCN;CXCL12;TBXAS1;TMBIM4;PPP1R15B;NTRK2;PCDH8;TXNDC12;PTGFRN;EPHB3;ARSA;EPHA4;ISLR2;KCNN2;LRRN2;NRP2;BBS5;AGTRAP;KIT;VEGFC;PDCL3;SCARB2;NXPH3;PSEN2;BMP4;PHTF2;DYRK3;LMBRD2;SLC3A2;HMGCR;SLIT2;MBTPS2;WSB1;DKK3;LRPAP1;FLRT3;ZFP131;SULF1;SULF2;PCYOX1L;SEMA6C;IGFBP2;SYPL2;ARMCX1;ZFP57;THA1;CCDC58;PPIL3;I…
SALL4-18804426_ESC	104	1065	0.0599424	0.0253192	0.0346232	1.79598e-14	-0.33512	10.6068	ENDOG;CACNA2D1;FN1;EIF2AK3;GPR19;KCNC1;SLC39A14;SEZ6;SLC7A3;GLRA2;SPP1;TMEM57;CTGF;KCNH2;IL6ST;NPTXR;PORCN;NPTX2;GRIA3;TXNDC5;BDNF;PTPRA;TBXAS1;COX4I1;NEO1;PPP1R15B;PPM1L;E2F1;DONSON;NELL2;SLC23A2;SLC12A7;EPHA4;ARSA;ISLR2;LRRN2;EXT1;GRIK5;COMMD3;AGTRAP;RGMA;KIT;PCNX;VEGFC;CALCA;NXPH3;WNT4;CRTAP;BMP4;PHTF2;DYRK3;LAMC1;HMGCR;GALNT1;ACVR2A;MBTPS2;CREB3L1;ASTN1;LRPAP1;ENDOD1;SSR1;SLC6A7;GABRB3;EMB;IF…
SMARCA4-20176728	110	1118	0.0634006	0.0265792	0.0368214	1.92836e-15	-0.309224	10.4772	TMEM97;HEMK1;CXADR;DDIT4;ABCB8;EDEM3;EIF2AK3;GPR19;PIGT;SLC7A8;MMP17;GSTP2;TMEM59;CSE1L;NOMO1;MAG;SLC9A8;IL4RA;PTPRE;ITGAV;TMBIM4;NPC2;ITGA7;SEC22C;LRRC8C;LRRC8D;TSPAN14;TXNDC11;TXNDC12;EPHA4;PAQR7;ZFP1;SLC45A4;EXT1;MIA2;HERPUD1;CD34;CTSB;COMMD3;CANX;EEF1E1;DERL1;PGRMC1;PNMA1;MGAT5;ORMDL3;PNPLA7;PDCL3;IGF1R;PLAU;SPINK8;ADAM10;ODF2L;CLK4;LMBRD2;SV2B;SV2A;SLIT3;ATP2B4;GALNS;WSB1;BCAM;ENDOD1;SLC19A2…
GATA4-21415370	169	2039	0.0974063	0.0484749	0.0489314	1.77874e-16	-0.278039	10.0832	POP4;CXADR;CACNA2D3;FUCA2;LGMN;SMPD1;SLC7A1;LAPTM4A;IL6ST;2510039O18RIK;AP4S1;TMEM120A;CLPTM1L;MCFD2;ITGAV;NEO1;ADORA2B;ITGA6;LRTM2;PCDH7;TSPAN13;NAGK;FBXO6;FBXO8;ALG2;BRI3BP;EXT2;FBXL4;FBXL6;DDR1;NRP2;HERPUD1;GAA;TMEM176B;DEGS1;AGPAT5;RALB;TTC13;BC004004;ERCC5;WDR73;NCSTN;FLRT2;ST3GAL5;ST3GAL6;NDFIP1;SQLE;PPT1;PAM;COQ10A;GAS6;NFIB;INSIG1;LRFN4;CPE;TPP1;SLC35A1;AMFR;SLC35B2;DAG1;CPT1C;CASZ1;LIAS;…
DACH1-20351289	157	1698	0.0904899	0.040368	0.0501219	2.84913e-19	-0.229447	9.79787	NDST2;DDIT4;UNC50;SAR1B;KCNC4;SMPD1;ATL2;ZSWIM7;DCBLD2;SNX14;LAPTM4A;DGAT2;DGAT1;ATP11B;FBXW2;HSP90B1;TMEM120B;TBXAS1;ACP2;ITGAV;ACP1;ITGA3;ICAM5;MFSD11;SYNGR2;EXT1;FBXL6;NRP2;GAA;CANX;PNMA1;PCNX;GNPTAB;ADAM17;ADAM15;SHARPIN;IGF2R;ZMYND19;PHTF1;NT5C3;TTC13;CCS;LRPAP1;WDR54;GNPTG;TCTN1;TIMP2;LDLR;G0S2;NUCB2;ANKRD13D;SLC39A3;CSGALNACT2;FKBP9;SLC38A10;CCDC47;THBD;DENND3;POLR2H;SLC35B1;UGCG;MLEC;ATP6…
TBX3-20139965	105	1068	0.0605187	0.0253905	0.0351282	8.98464e-15	-0.263407	8.51943	DDIT4;NR2F6;TMEM51;MRPL34;TMEM43;SLC39A14;PIGK;TMEM106B;KCNA2;FSTL5;RABAC1;PLXDC2;PLXDC1;SNX19;ZFP688;KCNH5;SLC9A9;IL6ST;HSP90B1;MBIP;TMEM19;EDIL3;SEZ6L;NCLN;NTRK2;SLC12A4;PCDH9;KCNJ9;PCDH7;FBXO8;EPHB1;SEC63;ARSK;EXT1;CHRDL1;RGMA;KIT;SFI1;RELN;ORMDL3;PNPLA7;DPY19L1;SCARB2;SCN8A;CACNA1C;SYT3;BMP4;CNTN1;MMP2;SPOCK1;FAHD1;CD9;TYRO3;ASTN2;RPN2;FLRT2;CHST10;CYB561D2;RSPO3;RPL11;RPL18;SULF1;SULF2;SMOC2…
GATA2-19941826	186	2410	0.107205	0.057295	0.0499096	2.96425e-15	-0.240862	8.05737	SPINT2;TSKU;DDIT4;ORAI3;ORAI2;FN1;L1CAM;TBL2;ACHE;SLC39A10;SLC7A5;SLC7A8;CHST2;RIC3;FADS3;KCNH2;ATP11B;FBXW2;MBIP;TXNDC5;TMEM120B;HTR1F;HPS1;TBXAS1;ECE1;TNFRSF1A;ADORA2B;TSPAN33;PCDH7;PCDH8;TM6SF1;TSPAN13;ST7;ICAM5;BSG;FBXO6;TMEM63B;SLC45A1;SDC3;MRAP2;DDR1;DHRS13;UIMC1;RELN;MGAT5;GABBR2;PDCL3;ADAM11;CACNA1A;CACNA1I;DHRS7B;CAV2;DEGS1;SDK2;PHTF2;SLC3A2;AGPAT3;AGPAT4;FAHD1;CD9;MRGPRE;ASTN2;GNS;SIAE;…
POU5F1-18347094	180	2109	0.103746	0.0501391	0.0536073	1.12523e-18	-0.17527	7.24365	CACNA2D1;DDIT4;JAG1;FN1;TSPO;SLC39A10;SLC39A14;SLC7A5;MMP14;SLC7A3;ADAM23;SPP1;LGR4;FST;IL6ST;IGSF21;GRIA3;GRIA4;ITGB8;ITGA3;ATRN;NTRK2;PCDH8;TSPAN13;SYT11;ST7;SLC23A2;ALG8;SLC45A4;UGT8A;SYNGR1;KCNN2;NTNG1;EXT1;PTK7;GRIK4;KCNT2;AGTRAP;CANX;KIT;FJX1;MGAT5;MGAT2;VEGFC;KCNS3;CRTAP;PHTF2;DYRK3;TNFAIP6;GRM8;AGPAT5;SLC3A2;NT5C3;TPBG;ATG10;ASTN1;LRPAP1;FLRT3;ICMT;PPT1;WDR44;COQ10A;CDC123;GABRA1;NFIB;PLP…
REST-19997604	158	2118	0.0910663	0.050353	0.0407132	5.26888e-12	-0.276982	7.193	HEMK1;DDIT4;1110051M20RIK;JAG1;PANX1;ERGIC3;ADAM23;SNX19;KCNH2;KCNH3;FBXW7;KCNH7;AP4S1;HTR1A;NEO1;HTR3A;SORL1;TSPAN13;ICAM5;PTGFRN;FBXO8;ALG5;TRIM13;UGT8A;SYNGR2;FBXL4;DHRS13;SDF4;BBS5;MRPS26;EEF1E1;PNMA1;MGAT2;PCDHB10;RIT1;PCDHB19;PCDHB16;IGF1R;DNAJB11;SIDT2;CRTAP;CNTN1;CNTN3;DYRK3;ZMYND19;TAZ;SEH1L;ANAPC10;SQLE;ABCC10;SYVN1;TNR;CLCC1;PLXNC1;DRD5;FANCL;P4HA1;TPP1;RFC2;DAD1;LEPROT;POLR2J;SLC35B4;…
CRX-20693478	78	668	0.0449568	0.0158809	0.0290758	9.70144e-15	-0.215008	6.93756	SAR1B;ENDOD1;GNS;CADM3;NDFIP1;CADM4;MRPL22;LPCAT1;PTH1R;CYB561D2;MESDC2;SSR4;SSR2;MMP16;ADCY2;FSTL4;FAM105A;CLPTM1;ANO10;P4HTM;TMCO1;PCYOX1L;DGKE;OLFML2B;NOMO1;SEMA6C;APOA1BP;FCGR1;TPST2;GRIA1;GPR89;PLXNA2;WFS1;TMEM17;CSPG5;CLPTM1L;ZFP112;SCPEP1;GM2A;SEZ6L;ANK;SEC22C;SEMA3F;RNFT1;PCDH1;SEC11A;SEMA4A;APP;DAG1;SIL1;IGSF8;GPM6A;CASZ1;MGST3;APH1A;SCAP;KCNN2;GPM6B;GRIK1;CTSS;SYP;SFI1;TOMM40;GBA;DERL2;…
TCF3-18467660	124	1388	0.0714697	0.0329981	0.0384716	2.01906e-14	-0.169336	5.33978	CACNA2D1;UNC5C;SLC5A6;EIF2AK3;TMEM9B;KCNC1;KCNC4;SLC39A10;ADAM22;SLC7A3;ADAM23;ATAD1;CSE1L;MAP3K6;KCNH2;CPA2;FST;CASD1;SLC9A2;IL6ST;NPTXR;IGSF21;GRIA4;TXNDC5;IGSF11;PTPRA;NEO1;ITGA6;PPM1L;E2F1;LRRC8C;SLITRK5;PCDH7;DONSON;HCRTR1;NELL2;TSPAN14;SLC23A2;PTGFRN;SEC63;KCNN2;LRRN2;EXT1;EXT2;NRP2;COMMD3;SORCS3;KIT;CD47;CRELD2;EXOSC8;GPC3;PCNX;KCNS1;PLAU;ADAM15;SLC1A4;CACNA1H;WNT6;FUT8;WNT4;CRTAP;BMP7;CLK…
GABP-19822575	229	2639	0.131988	0.0627392	0.0692492	1.42943e-24	-0.079966	4.39051	NUP107;POP4;ENDOG;SAR1B;RDH14;PRPF38B;JAG1;KCNC3;SLC39A10;MMP14;ERGIC3;ATAD1;SNX14;MAP3K6;CNPY3;FBXW2;MINPP1;TXNDC5;CLPTM1L;ACP2;ACP1;ATRN;TMBIM6;PCDH8;NAGK;C1GALT1C1;ALG8;ALG9;ALG5;KCNN1;EXT2;FBXL6;UIMC1;SDF4;MRPS26;KIN;GRIN1;PDCL3;NDUFAB1;TCEA2;SYS1;GNPTAB;DNAJB12;ADAM10;UBE4A;ADAM17;PPIH;PPIB;SHARPIN;DHRS7B;FAM151B;TMEM222;TAPBP;TMEM216;MAN1B1;AGPAT5;SLC3A2;TMEM203;TMEM206;TRDMT1;TTC13;ERCC5;W…
POU5F1-16518401	122	1550	0.070317	0.0368495	0.0334675	7.78904e-11	-0.133699	3.11194	UNC5C;DDIT4;JAG1;MMP16;SLC7A3;DCBLD1;CRLF1;IL1RAP;KCNH3;IL6ST;SLC27A4;MBIP;G6PC3;ACP1;ITGA7;FYB;SYT13;SST;SYT11;ST7;KCNK4;SLC23A2;KCNK12;EXT1;CRTAC1;SDF2;GABBR1;CELSR2;SDK1;TNFAIP6;RALB;SPOCK2;SLIT1;SLIT3;CCS;ASTN2;1700021F05RIK;PAM;LDLR;SMOC2;DHRS7;NFIB;TNR;PLXNA2;PLXNA4;LRFN5;LRFN1;C1QL2;SLC35B4;POR;COL18A1;SLC35F5;SLC35F4;TWISTNB;COMT;BMPER;THPO;FGFR1;H2-T23;HS2ST1;STOML1;NRXN1;NRXN2;ZFYVE27;P…
EOMES-20176728	150	1744	0.0864553	0.0414616	0.0449937	6.0658e-16	-0.0806374	2.82543	SPINT2;ALKBH6;CXADR;DDIT4;TMEM126A;ASPHD2;EIF2AK3;FXYD6;CHST1;GSTP2;SLC7A1;PLOD1;MINPP1;HSP90B1;HTR1A;ACP2;ITGAV;TMBIM4;PCDH1;KCNJ4;SORL1;TSPAN14;SLC23A2;TRIM11;EXT1;GRIK4;SDF2;CANX;EEF1E1;PNMA1;MGAT5;ORMDL3;PNPLA7;DNAJB12;ADAM15;CACNA1C;SYT3;IGF2R;GRM8;SLC3A2;SV2B;GALNS;GABRG2;NDFIP2;ELMOD1;LDLR;PCYOX1L;PLP2;DNAJC3;LEPROT;POLR2K;FKRP;SLC35A3;P2RX4;PPIL3;VEZT;SLC22A5;ATP6V0A1;TRPM4;COL18A1;SPPL3;…
NACC1-18358816	79	769	0.0455331	0.0182821	0.027251	2.72906e-12	-0.091422	2.4343	SPINT2;SLC5A6;MRPL23;GSTP2;TMEM70;ADAM23;SPP1;CEPT1;CTGF;KCNH3;IL6ST;PORCN;NPTX2;GRIA3;TBXAS1;PPP1R15B;ATP9A;ST7;FBXO6;PTGFRN;SLC12A7;ARSA;EPHA4;ISLR2;EPHA10;LRRN2;AGTRAP;KIT;TLCD1;VEGFC;LMTK3;NXPH3;PSEN2;BMP4;DYRK3;CREB3;AGPAT5;SLIT2;TAF12;GLB1;LRPAP1;SLC6A7;TRIM7;EMB;IFNGR2;WDR12;SULF2;SLCO4C1;DGKE;TM7SF3;SLC39A3;SEMA6C;IGFBP2;ZFP57;NSG2;MGAT4C;IFITM1;IFITM2;ARL6IP5;SIL1;SLC6A15;PTGES;IGSF8;TEX…
CHD1-19587682	85	843	0.0489914	0.0200414	0.02895	9.97085e-13	-0.0778427	2.1511	POP4;ALKBH6;NGDN;ABCB8;PRPF38B;EIF2AK3;TBL2;SFXN4;GPR19;TSPO;NIPA2;PSMA1;TMEM106B;ERGIC2;CLPTM1;SPP1;GPR89;BCDIN3D;G6PC3;TMEM19;ACP1;PPP1R15B;NDUFB8;HSD17B11;NDUFA4;ZDHHC5;TXNDC12;EPHA7;ALG8;TRIM13;APH1A;SYNGR1;CTSL;CRELD1;SFI1;PSEN1;0610037L13RIK;UBE2S;PEX3;SLC3A2;HMGCR;MBTPS1;TAF12;GLA;GCSH;PIH1D1;LRPAP1;GLG1;SERPINI1;CDC123;RPS3;LDLR;TM9SF2;CYP20A1;PARK7;RPS9;ARMCX1;GPR108;TPP1;CCDC47;GM2A;GPX…
CLOCK-20551151	54	407	0.0311239	0.00967596	0.021448	1.5921e-12	-0.0782559	2.1259	CLDN5;DDIT4;RPN2;RDH11;SSR1;ELN;MMP14;G0S2;CLU;SLC39A6;MAP3K6;DGAT2;DGAT1;FBXW7;ABHD6;HSP90B1;CXCL12;SERINC1;THBD;ITGA6;PPP1R15B;DNAJB9;SEMA4A;ARSA;ACSL5;SLC22A5;MGST3;PTDSS2;SGPL1;TSPAN6;TMEM86A;CALR;COL18A1;PTPRS;CX3CL1;HERPUD1;PGRMC1;XDH;TCAP;PLAT;COMT;TOMM20;CHCHD7;PDIA4;ADAM17;FUT8;DPP7;HSPA5;NFKBIA;STT3B;RBM3;MFSD1;ABCC5;NCAM1
NKX2-5-21415370	124	1507	0.0714697	0.0358272	0.0356425	3.75023e-12	-0.0569878	1.4993	UXS1;TMEM97;ALKBH6;CACNA2D3;ORAI3;DDIT4;ABCB8;ABCB9;CYB5R1;JAG1;ABCA3;FUCA2;LGMN;SMPD1;SIRT3;PIGC;SLC7A5;PIGG;EXTL3;EVC2;OLFML2B;CSE1L;LAPTM4A;SLC9A5;IL6ST;BLM;HSP90B1;PTPRE;CXCL12;TMEM11;RASGRF1;ITGAV;NEO1;DGCR2;ADORA2B;PPP1R15B;LRRC8C;LRRC8A;NDUFA4;SLC23A2;ZDHHC6;TXNDC11;TXNDC12;ICAM5;TXNDC15;EPHB3;EPHA4;OMD;SURF1;FBXL6;DHRS13;NRP1;UIMC1;QSOX1;VKORC1;TMEM176B;DPY19L1;NDUFAB1;OSTF1;SLC30A7;ADAM1…
MYB-21317192	95	923	0.054755	0.0219433	0.0328118	1.46246e-14	-0.0366537	1.16764	TMEM97;ZFYVE27;VOPP1;HSD11B1;TBL2;FXYD5;LMBR1;GSTO1;SLC7A5;ERGIC2;EXTL2;SNX25;FLNA;PLXDC1;CENPP;ZFP688;OLFML2B;IL1RAP;TSEN2;BLM;GRIA3;TMEM120A;SRD5A3;G6PC3;TBXAS1;PTER;ADORA2B;HSD17B11;LRRC8D;ST7;ZDHHC6;ZFP1;BTD;NEU1;CTSK;MGAT5;XDH;GABBR1;SORT1;RIT1;RAMP1;IGF1R;GNPTAB;FAM3C;OSTF1;CAR4;TMX4;PSEN2;FUT8;PRNP;DEGS1;VCAN;ACVR1B;WSB1;NUP210;MED7;SSR1;H13;LFNG;IFNGR1;SSR2;IFNGR2;BACE1;PCYOX1L;PLP2;GRB14…
TCF3-18347094	180	2221	0.103746	0.0528017	0.0509446	1.24866e-16	-0.00329972	0.120834	TSKU;CACNA2D1;DDIT4;JAG1;FN1;SLC39A14;CHST2;SLC7A3;SPP1;KCNH7;IL6ST;GRIA3;ITGB8;E2F1;PCDH8;SLC23A2;PTGFRN;ISLR2;SLC45A4;SYNGR1;EXT1;PTK7;GRIK4;CRTAC1;AGTRAP;KIT;ORMDL3;VEGFC;TCAP;UBE4A;ADAM17;PHTF2;DYRK3;TNFAIP6;GRM8;SLC3A2;TPBG;NUP210;ATG10;ASTN1;LRPAP1;FLRT3;ICMT;PPT1;PPT2;COQ10A;GAS6;ADCY2;SYVN1;NFIB;PCYOX1L;FKBP7;PLXNA2;M6PR;NSG2;DNAJC3;POLR2H;IFITM1;IFITM2;SLC35B4;DAG1;FUT10;ATP6V0A1;COL18A1…
KLF4-19030024	135	1502	0.0778098	0.0357083	0.0421015	8.50388e-16	-0.000704723	0.0244545	SPINT2;ZFP296;ABCB8;FN1;SFXN4;HYOU1;GPR19;KCNC3;KCNC4;CHST8;MESDC2;SLC39A10;TMC6;SUMF2;MMP16;MMP15;SEZ6;ADAM23;CLPTM1;SPP1;WNT7B;TMCO1;CENPP;CRLF1;LAPTM4A;FBXW2;IL6ST;NPTXR;IL4RA;NPTX1;GRIA3;BDNF;CXCL12;G6PC3;PPP1R15B;HSD17B11;CNNM4;PCDH7;PCDH8;NAGK;SPON1;ZDHHC5;ALG8;ISLR2;PCDH10;SURF1;EXT1;CALR;PCSK2;NRP2;PTPRJ;SORCS2;RGMA;CRELD1;TLCD1;FJX1;RELN;GPC1;CD55;NPM1;VEGFC;KCNS3;TCEA2;PDGFRA;KIRREL2;WN…
SIN3B-21632747	440	4302	0.253602	0.102275	0.151327	3.11915e-68	0	0	UNC5A;UNC50;DDIT4;ORAI3;JAG2;EIF2AK3;L1CAM;KCNC1;KCNC3;GSTO1;TMEFF2;CHST1;CHST2;RIC3;LAPTM4A;KCNH2;KCNH3;DGAT2;KCNH7;FBXW7;FBXW2;2510039O18RIK;MBIP;CLPTM1L;HTR3A;TNFRSF1A;LRTM2;E2F1;HTR5A;HCRTR1;SST;FBXO8;B4GALNT4;GRIK5;HERPUD1;KCNT1;BBS5;SYP;FITM2;ORMDL3;NEK11;CELSR2;IGF1R;DNAJB12;DNAJB11;SDK2;ZMYND19;SFSWAP;PSMB10;SLIT1;TTC13;BC004004;NUP210;BCAM;FANK1;ADAMTSL1;METTL21A;SLC17A5;SLC17A7;PARK7;TN…
JUN-21703547	164	1585	0.0945245	0.0376816	0.0568429	1.19882e-24	0	0	POP4;NDST3;EIF2AK3;KCNC4;SLC39A10;TMEFF2;MMP14;MMP16;ERGIC2;ADAM23;SNX14;CRLF1;FBXW7;AP4S1;KCNF1;TNFRSF1A;TNFRSF21;FYB;NTRK2;PCDH9;NTRK3;OCIAD1;SLC23A2;TRIM13;KCNQ5;ADCYAP1R1;NTNG1;NTNG2;EXT1;MRPS11;GRIK5;KIN;CANX;VEGFC;PLAU;SYT4;SYT1;CNTN3;DEGS1;SV2B;SLIT2;TTC13;CD9;ASTN2;FANK1;GABRB3;ABCC10;CDC123;CLDND1;ADCY2;ADCY8;SLC17A5;GABRA5;KIDINS220;SLC39A6;TMEM132D;TMEM132B;CPE;CSPG5;LEPROT;COCH;IL21R;…
SMAD4-21741376	223	2738	0.12853	0.0650928	0.0634374	9.38101e-21	0	0	SPINT2;TSKU;NDST2;HTR6;UNC5C;DDIT4;UNC50;ASPHD2;JAG2;JAG1;FN1;FXYD6;ACHE;KCNC4;SLC7A5;TMEFF2;CHST1;ATL2;P4HTM;KCNB2;DCBLD2;LGR6;KCNH3;DGAT2;FBXO17;FBXW2;MINPP1;GRIA1;MBIP;KCNF1;HTR1A;TBXAS1;ECE1;BOC;ADORA2B;ITGA6;TNFRSF21;PCDH1;NTRK2;TM6SF1;TSPAN13;SLC23A2;ALG2;EIF1B;SDC3;KCNN2;CD200;NRP1;NRP2;WFDC1;KIT;PCNX;XDH;KCNS3;TCEA2;IGF1R;ADAM11;DNAJB12;CACNA1B;CACNA1C;CACNA1G;SDK1;CNTN3;QRFPR;SLC3A2;AGPA…
FOXP3-21729870	138	1404	0.0795389	0.0333785	0.0461604	4.4834e-19	0	0	PGAP1;NUP107;NDST2;LACTB;HEMK1;RETSAT;SAR1B;ABCB9;PRRT3;MAGOHB;MRPL21;SUMF1;PSMA1;PIGG;KCNA2;ATL2;TMEM68;CLPTM1;TMCO1;CENPP;SLC9A1;NFE2L1;POMT1;PTER;ACP2;TNFRSF1A;RNFT2;LRRC8A;CNNM4;BEND5;PCDH9;NDUFA4;MCOLN1;ZDHHC6;ZDHHC8;SPATA24;OGFOD2;FBXO8;ZFP1;ALG2;NEU1;ARSK;NTNG2;SLC10A7;MRPS11;MIA3;PCSK5;SPTLC1;HYAL2;QSOX1;GBA;DERL1;FITM2;EXOSC8;YIPF1;YIPF4;DOHH;DPAGT1;BCCIP;DNAJB12;ADAM10;TMX4;ADAM15;SIDT2…
SPI1-20176806	147	1654	0.0847262	0.039322	0.0454043	9.76433e-17	0	0	SPINT2;TSKU;ENDOG;UNC5A;UNC5C;UNC50;VOPP1;EXD2;RDH11;MAGOHB;HYOU1;ERGIC3;SLC7A3;MPV17L2;CNPY3;HHATL;TBXAS1;TNFRSF1A;TMBIM6;DRAM2;PCDH1;SYT11;ISLR2;FBXL6;DHRS13;FITM2;GRINA;MMGT2;SHARPIN;DHRS7B;CAV2;DEGS1;SDK2;PODXL2;AGPAT5;SLC3A2;RSPH9;CD9;ANKLE2;XYLT2;ST3GAL5;H13;ELMOD2;HIPK4;IFNAR2;FKBPL;FCGR1;PLXNA1;M6PR;P4HA1;THA1;SEC11A;SLC35B4;FCF1;IL15RA;SLC35F4;TMED7;CD302;AMIGO1;C1RA;QPCT;GM561;TCTEX1D2;…
CEBPB-20176806	132	1588	0.0760807	0.0377529	0.0383278	3.73124e-13	0	0	UNC5A;CACNA2D3;VOPP1;RDH11;EIF2AK3;MAGOHB;ACHE;TSPO;DGAT1;CNPY2;TBXAS1;TNFRSF1A;ADORA2B;ITGA7;TMBIM6;FYB;SST;SYT11;ST7;ISLR2;FBXL6;DHRS13;OS9;MGAT5;GRINA;DHRS7B;DEGS1;SDK2;DYRK3;TMEM216;MAN1B1;AGPAT5;SLC3A2;NT5C3;CD9;FLRT3;H13;C1QTNF4;FCGR1;LYZ2;SLC38A10;PLXNA1;FANCL;P4HA1;THBD;IL15RA;MLEC;VASN;TMED7;GFRA1;CD302;C1RA;GM561;TATDN3;TCTEX1D2;TRPV2;EFNA2;CAPRIN2;KLHDC9;TMEM2;ATP13A3;RHBDL1;ABCA2;CADM…
FOXP2-21765815	102	1164	0.0587896	0.0276728	0.0311168	1.26587e-11	0	0	CACNA2D1;UNC50;SFXN4;HYOU1;GPR22;PANX1;SLC39A10;SUMF1;PIGC;GLRA2;CSMD1;COL3A1;0610007P14RIK;LAPTM4A;DGAT2;LY6H;HTR1A;RASGRF1;BOC;EDIL3;NDUFB8;CNNM4;NDUFA8;NTRK2;TSPAN13;PTGFRN;SLC12A9;PAQR7;ALG2;ISLR2;SLC45A1;UBE2J2;KCNN1;SCN3B;NTNG1;FBXL4;NRP2;SLC7A14;PTPRJ;PCDHB20;CREG2;PCDHB11;PCDHB16;CACNA1A;PSEN1;EBP;FUT8;BMP7;SDK1;MANSC1;RPGR;NPTN;PLA2G4A;SV2A;SCN7A;FAHD1;TPBG;CCK;ACVR2A;ASB2;VIP;GLA;GCSH;N…
SIN3A-21632747	103	1186	0.059366	0.0281958	0.0311702	1.61572e-11	0	0	LACTB;UNC5A;UNC50;DDIT4;FN1;NR2F6;KCNC3;TMEM51;LETM2;TMEM43;PIGK;PIGG;ATL1;RABAC1;ZFP688;FBRSL1;SLC16A3;SLC9A5;IGSF21;AP4S1;NPTX1;BCDIN3D;NFE2L1;PPP1R15B;LRP1;LRTM2;NAGK;ICAM5;OGFOD2;SEC62;MFSD11;KCNN1;SCN3B;SLC10A7;NRP2;CTSL;SDF4;VKORC1;DERL2;NPDC1;CACNA1A;1810055G02RIK;VGF;TMEM216;AGPAT5;PSMB10;TMEM203;TMEM208;TAF12;ATP2B2;GCSH;CHGB;TYRO3;H2-D1;ANAPC10;TMEM192;ABCC10;RPL11;RPL18;KIDINS220;FAM71…
SMAD3-21741376	119	1460	0.0685879	0.0347098	0.0338781	1.81259e-11	0	0	PGAP1;SPINT2;TSKU;NDST2;DDIT4;ASPHD2;FN1;CP;GRIN2B;ELOVL2;SLC7A5;DSCAML1;GPR45;ATL2;SEZ6;EXTL2;LGR6;TSEN2;FST;GRIA1;IGSF21;AP4S1;GRIA3;KCNF1;PTPRE;TBXAS1;CNTNAP2;ITGA6;PPP1R15B;LRRC8D;PCDH1;TM6SF1;NELL1;EPHB3;EPHA4;TMEM87B;KCNN2;TMEM86A;PCSK2;PTPRR;MRPS11;PTPRO;PTPRM;DIRC2;CTSC;PERP;XDH;CD83;SLC30A7;ADAM10;SEL1L;SLC1A1;CACNA1B;WNT4;BMP7;STT3B;SDK2;RRBP1;AGPAT3;SV2B;HS3ST1;LNX1;XYLT2;TYRO3;ASTN2;F…
TFEB-21752829	77	808	0.0443804	0.0192093	0.0251711	1.34455e-10	0	0	WLS;DDIT4;PLBD2;PANX1;TMC6;SUMF1;PIGC;CNPY2;HPS1;CNNM2;MCOLN1;MGP;ST7;TXNDC11;BSG;ALG1;MFSD11;EIF1B;ARSK;NEU1;CALR;FBXL2;GAA;AGTRAP;GBA;CREG2;NPM1;ESYT1;DNAJB12;ADAM10;DOLK;IGF2R;BMP4;STT3A;NPTN;GPCPD1;RCN2;HMGCR;CLN3;FAHD1;CLCN7;NUP210;GNS;PRDX4;SSR1;PPT1;SSR3;GRN;CYP20A1;NAGLU;SLC39A1;ARMCX6;ERP29;INSIG1;FAM26E;M6PR;TPP1;SCPEP1;SLC37A3;SEC11C;SLC35B2;CISD2;SLC35A5;MRPS18C;AFG3L2;SLC33A1;SLC35E3…
PADI4-21655091	90	1037	0.0518732	0.0246535	0.0272197	3.25937e-10	0	0	DDIT4;RETSAT;MRPL13;EDEM3;SRPR;SLC7A4;PSMA1;MMP16;ERGIC2;PTGS2;CLPTM1;TMEM59;LAPTM4A;HSP90B1;MBIP;NFE2L1;DSE;RNFT2;MBOAT7;SORL1;ZDHHC5;TXNDC12;EPHB3;ARSK;NTNG1;KCNT2;OS9;PERP;PCNX;DPAGT1;SCARB2;OSTF1;ENPP5;UBE4A;DNAJB11;CACNA1C;KCNV1;BMP7;PLA2G4A;CREB3;RCN2;SLC3A2;HMGCR;CLN3;TMEM205;TMEM208;THYN1;NHLRC3;WDR73;RNF128;RNF121;GNS;SQLE;SERPINI1;SF3B5;CDC123;ASAH1;CLDND1;SIAE;SYVN1;PARK7;TNR;ANKRD42;G…
GATA2-21666600	75	837	0.0432277	0.0198987	0.0233289	2.81277e-09	0	0	SCAMP5;TMEM88;CXADR;CLDN5;ORAI3;PRPF38B;EDEM2;LMBR1;EXTL2;DCBLD1;SNX19;LAPTM4A;EFEMP1;SLC9A1;SRD5A3;MCFD2;ECE1;DSE;ITGAV;NPC2;LRRC8A;ATP9A;MBOAT7;TM6SF1;HTR5A;MERTK;MGP;PTGFRN;SLC45A4;NTNG2;MRPS11;TMPRSS7;TCEA2;PLAT;PLAU;SLC30A7;CACNA1C;DHRS7B;RALB;ACVR1B;CLCN3;CLN8;TTC13;GNS;ST3GAL6;ADAMTSL1;ELMOD2;NFIB;RNF149;CYB561;TEX2;INSIG1;PSAP;GPR108;DHCR24;SLC26A8;SLC37A3;AMFR;PTPN12;IFITM2;ARL6IP5;ATP6V…
PPARG-20176806	75	837	0.0432277	0.0198987	0.0233289	2.81277e-09	0	0	LIPA;1110051M20RIK;EDEM1;MAGOHB;PIGX;GSTO1;SLC39A10;KCNA2;COL11A2;EXTL2;TMEM68;PLOD1;CTGF;DGAT1;AP4S1;TMEM120A;TBXAS1;POMT1;DSE;TMBIM6;LRP1;FYB;LRRC8C;SLC23A2;NTNG1;DIRC2;CD47;CD44;TMPRSS7;MGAT5;GABBR2;ENPP5;TMX4;PSEN2;DHRS7B;DYRK3;PODXL2;SUN1;TMEM218;TMEM201;CD9;CHPT1;ASB2;MED4;SLC16A11;H13;MRC1;ELMOD2;HSPA13;TMEM39B;CYB561;IFNAR2;ST7L;INSIG1;MUSTN1;PLXNA1;SCPEP1;SEMA3F;UGGT2;APP;OCLN;FAM69B;ROB…
IKZF1-21737484	25	155	0.0144092	0.00368495	0.0107243	5.46569e-08	0	0	PDGFRB;EPHA10;SLC1A4;KCNN2;TRPV2;B3GALT4;L1CAM;DNAJC10;FXYD6;PPT2;KCNC3;GRM2;ATP6V0B;GPX7;RFT1;LCT;NLGN3;CLCN2;COCH;CACNG8;GABBR1;ATP2B4;CTNS;PLXDC2;KCNK4
IRF8-21731497	32	319	0.0184438	0.00758386	0.0108599	1.2621e-05	0	0	ZDHHC6;ALG9;ZFP296;PSME2;ATP6V0A1;SLC10A7;HEXA;PTPRJ;CTSS;CTSB;GRN;GPR150;XDH;CD68;GOLT1B;GPR68;CYP46A1;TPST1;ERP29;ANKRD42;ABHD2;H2-M3;0610037L13RIK;MAN2B2;TREM2;BC017643;TAPBP;CLN8;PSMB10;SLITRK1;TM6SF1;ACVR2A
ZNF652-21678463	12	112	0.00691643	0.00266267	0.00425375	0.00385418	0	0	RPS5;IGSF11;PHTF2;ROBO1;TNFRSF1A;FAM20B;LDLR;PNPLA7;PLXDC2;GALNS;SNX14;VIP
MYBL1-21750041	9	161	0.00518732	0.00382759	0.00135973	0.233426	0	0	TXNDC12;FKBP7;ADAM9;TBL2;UBE2S;SCPEP1;SDF2;TM9SF3;CLPTM1
NOTCH1-21737748	10	245	0.00576369	0.0058246	-6.09077e-05	0.557857	0	0	ALG2;PCDH19;IGF1R;SEMA7A;DNAJC25;BMP4;POMT1;IL21R;SCN7A;FKRP
TRIM28-17542650	82	3568	0.0472622	0.0848251	-0.0375629	1	7.43373	-9.34135e-09	CRHBP;JAG2;JAG1;KCNC1;CHST7;CHST1;KCNA1;SNX19;KCNF1;GRID1;E2F1;BTD;FBXL4;SDF2;IGF1R;FAM3C;SLIT1;CD9;ADCY2;DAD1;SYNPR;MTX2;BMPER;BAMBI;EDEM1;NPTX2;BDNF;POMT1;FURIN;NELL2;EPHA4;EPHA7;BMP7;BMP4;VGF;DKK3;TYRO3;PRDX4;PNOC;SULF2;GRB14;TREM2;ACSL3;FRG1;ATL1;PCDH8;SYT12;EXT2;WFDC1;MGAT5;PPIH;SYT3;FLRT2;SMOC2;LRFN2;LRFN5;GFRA1;TLR3;WNT5A;FBLN5;CTGF;ACVR1;ZFP1;PTPRU;CD44;GPC1;GPC3;RAMP1;NXPH2;WNT6;FUT8;SCN…
TP63-19390658	4	179	0.00230548	0.00425552	-0.00195005	0.934536	2.71929	-0.18411	SNF8;POLR2F;NFYC;NFIB
GATA2-20887958	156	1708	0.0899135	0.0406058	0.0493078	1.05807e-18	0.0182639	-0.755943	DDIT4;VOPP1;JAG2;TBL2;ACHE;KCNC1;ATL2;ADAM23;SNX14;MAP3K6;TPST2;BLM;MCFD2;SEZ6L;TNFRSF1A;E2F1;ST7;SLC23A2;ALG5;ISLR2;NEU1;CALR;FBXL2;DDR1;GRIK1;CANX;ORMDL3;IL34;PDCL3;IGF1R;FAM198A;GNPTAB;ENPP5;SLC41A3;DEGS1;DYRK3;MAN1B1;RALB;NT5C3;TMEM201;H13;ELMOD2;CDC123;GRP;IFNAR2;INSIG1;LRFN2;SLC26A8;UFSP1;DAD1;LCT;LMF1;SEC11A;SLC35B4;NIPAL3;FUT10;TMED4;GFRA1;SUSD1;SPCS3;ATP1B1;PI4KA;H2-T23;TMEM9;ATP1A3;PDSS…
PDX1-19855005	69	669	0.0397695	0.0159047	0.0238647	5.63063e-11	0.0726027	-1.71344	POP4;TMEM97;NUP210;ST3GAL5;RDH14;EIF2AK3;TBL2;SRPR;ABCC10;MRPL32;LFNG;SMPD1;EMB;MESDC2;TMEFF2;SLC7A8;GRN;LDLR;ATAD1;SYVN1;TMEM59;CLSTN3;FKBPL;FBXW7;ERH;INSIG1;IL4RA;HSP90B1;M6PR;SLC4A10;LRFN5;CALR3;THBD;SLC37A4;TNFRSF1A;LEPROT;OGFOD2;CPT1C;PTDSS1;ARSK;CIDEA;FBXL6;PTPRN;SDF2;USMG5;MAGEH1;TOMM40;DERL1;CXCR4;ORMDL3;BCAP31;BCCIP;DNAJB11;NDUFB11;SYT4;SYT1;EFNA1;STT3A;PHTF2;CKS1B;TIMM17A;TMEM109;SSTR3;…
TET1-21451524	164	1839	0.0945245	0.0437201	0.0508044	1.03681e-18	0.0421345	-1.7448	HTR6;NDST3;ENDOG;CACNA2D3;PLBD2;MMP16;GOLM1;WNT7B;EFEMP1;FBXO17;CNPY3;CASD1;SLC27A4;MCFD2;ITGA3;ATRN;TSPAN33;SYT13;HCRTR1;TBATA;KCNK4;ISLR2;MOGS;SDC3;SYNGR1;CRTAC1;TLCD1;FITM2;PCDHB13;PCDHB17;2610524H06RIK;FAM198A;MMGT2;CACNA1H;CACNA1I;SHARPIN;CAV2;TNFAIP6;AGPAT5;RALB;NT5C3;TMEM203;H13;WDR54;PCDHB3;FANK1;SYVN1;AUP1;IFNAR2;IFNAR1;SLC38A10;LRFN4;NSG2;LRFN1;PLXNB2;GAL3ST3;THA1;HAUS7;POLR2F;POLR2H;SL…
GATA2-21571218	107	1111	0.0616715	0.0264128	0.0352587	1.70049e-14	0.0574083	-1.82015	LIPA;CHID1;UNC5A;DDIT4;CADM3;EIF2AK3;SLC7A5;TMEM106B;DSCAML1;FSTL4;SPP1;CSMD1;EVC2;PLXDC2;FBRSL1;CNPY3;OLFM2;BLM;NPTX1;CXCL12;GRID1;ITGA7;FURIN;PCDH1;KCNJ9;TSPAN14;ICAM5;TXNDC15;ARSA;TRIM11;EPHA10;SURF4;PTPRK;PCSK5;CD44;NPDC1;PDCL3;DPY19L3;CLGN;IGF1R;ADAM11;DNAJB12;CACNA1C;CACNA1H;CACNA1G;FUT8;SNTG2;DHRS7B;CLK4;IGF2R;DEGS1;MMP2;AGPAT3;CHPT1;ANKLE2;NUP210;PNOC;FANK1;LPCAT1;LFNG;ELMOD2;TMEM175;TMEM…
MYC-19915707	208	2979	0.119885	0.0708223	0.0490624	6.34047e-13	0.0664569	-1.86655	ALKBH6;NDST2;UNC5A;PRPF38B;FN1;TBL2;FXYD5;KCNA1;KCNA2;WNT7B;PLOD1;DGAT1;FBXW7;FST;SLC27A4;TBXAS1;ITGAV;ITGA3;NTRK3;SYT16;HCRTR1;TSPAN13;SYT11;SLC23A2;ALG1;UGT8A;NTNG1;BRI3BP;MRPS11;SDF2;KIN;EEF1E1;GABBR1;IGF1R;ADAM17;ADAM15;SIDT1;PPIH;SYT4;SDK1;CNTN1;SDK2;PHTF2;PODXL2;TNFAIP6;RER1;RALB;SLIT1;GABRG2;LRPAP1;FLRT2;ST3GAL3;NDFIP1;PPT1;PPT2;ELMOD2;GRP;SLC17A7;GABRA2;SMOC2;DHRS7;NFIB;NUCB2;SLC8A2;FKBP9…
MEIS1-20887958	134	1452	0.0772334	0.0345196	0.0427138	1.63134e-16	0.0515223	-1.87294	NUP107;PGAP3;METTL7A1;ASPHD2;ABCB8;JAG2;ABCA2;EIF2AK3;MRPL23;TBL2;ACHE;SUMF2;PIGG;RABAC1;TMCO3;TMCO1;PLOD1;TSEN2;DGAT2;SLC9A9;IL4RA;SLC9A1;TMEM120B;MCFD2;POMT1;TNFRSF21;SEC22C;RNFT1;LRRC8D;TM6SF1;OCIAD1;ZDHHC5;ICAM5;OGFOD2;EPHB2;PAQR7;ZFP1;DYM;TECR;IER3IP1;SDF2;CD34;VKORC1;KIN;CANX;CRELD2;MGAT5;ORMDL3;PCNX;NPDC1;PNPLA7;SORT1;YIPF4;DOHH;PDCL3;CD68;CD81;CYP46A1;FAM174A;ENPP5;PDGFRB;PLA2G15;FAM173A;…
CIITA-18437201	2	59	0.00115274	0.00140266	-0.00024992	0.701489	5.54205	-1.96493	TMED1;TMEM14C
IRF1-19129219	9	196	0.00518732	0.00465968	0.000527643	0.424662	2.55749	-2.19039	VEZT;CREB3L1;PTPRN2;DHRS13;KCNT2;PIGG;FUT8;ACP2;NLGN1
FLI1-20887958	179	2030	0.10317	0.0482609	0.0549091	6.684e-20	0.057949	-2.55856	UNC50;ORAI2;EXD2;JAG2;FUCA1;EIF2AK3;FXYD5;LAPTM4A;FBXW2;HPS1;MCFD2;ACP2;TMBIM4;TMBIM6;TNFRSF21;TM6SF1;NAGK;OCIAD1;SLC23A2;ICAM5;ALG8;TRIM11;CALR;FBXL2;FBXL4;SDF2;KIN;CANX;GBA;ORMDL3;TMEM176B;PDCL3;SYS1;CELSR2;ENPP5;MMGT2;DNAJB12;SLC41A3;DHRS7B;MAN1B1;AGPAT5;PSMB10;TMEM203;TMEM206;TMEM208;FAHD1;ERCC5;ICMT;H13;TCTN2;NFIB;AUP1;FKBPL;IFNAR1;INSIG1;FANCL;UFSP1;EMILIN1;CHPF2;SLC35B2;SLC35B4;FCF1;STXBP2…
CREB1-15753290	45	957	0.0259366	0.0227516	0.00318501	0.212723	1.753	-2.71323	SLC5A6;ABCB8;LGMN;SRPR;RABAC1;FBXW2;NFE2L1;PPP1R15B;NAGK;FBXO8;PCDH10;SDF2;VMP1;DNAJB12;UBE4A;DNAJB11;SEL1L;PSEN1;MAN1B1;HMGCR;CLCN3;ERCC5;GLA;RPL5;WSB1;IFNGR1;SSR2;SSR3;RPL18;AUP1;RPS5;CPD;CPE;RFC2;DNAJB9;POLR2K;SLC35A2;IFRD1;MRPS18C;ANKRA2;MLF1;HSPA5;CKS1B;RFT1;SSBP1
MEF2A-21415370	92	1048	0.0530259	0.024915	0.0281109	1.19997e-10	0.120937	-2.76263	CACNA2D1;CACNA2D3;UNC50;ABCB8;ABCA3;EDEM1;GPR22;MRPL34;TMEM43;SIRT3;PIGC;PIGG;SLC7A1;TMEM59;LGR6;OLFML2B;SLC16A3;KCNH2;KCNH3;GRIA1;TMEM11;TBXAS1;COX4I1;PPP1R15B;LRP3;PCDH7;TXNDC11;ZDHHC6;BCAP29;DYM;PTK7;NRP1;NRP2;WFDC1;SORCS2;RGMA;CD47;SFI1;MGAT5;ORMDL3;PDCL3;DPAGT1;PLAU;SNTG2;LAMC1;GRM2;PEX3;GALNS;COL12A1;MED4;NCSTN;PAM;PRSS23;NFIB;TMEM39B;CDH2;SLC39A3;STIM2;ADAM9;GPR108;LRFN3;CPD;DNAJC1;POLR2J;…
SRF-21415370	129	1634	0.0743516	0.0388465	0.0355051	1.80281e-11	0.12129	-3.00059	UNC50;SFXN4;SMPD1;GSTO1;NUDT14;CLPTM1L;MCFD2;PCDH7;SORL1;NAGK;BSG;BTD;EXT2;FBXL6;AGTRAP;OS9;ORMDL3;RPP30;UBE4A;ADAM15;SIDT1;UBE2S;TAPBP;MAN1B1;SLC3A2;WDR73;LRPAP1;PPT1;TCTN2;SIAE;LDLR;CLU;SLC39A9;TPP1;DAD1;POLR2F;DNAJB9;CCDC58;SLC35B3;SLC35B2;FCF1;IL15RA;STXBP2;LIAS;ZDHHC17;CBR4;SPCS3;GM561;TMEM38B;FGFR1;POMGNT1;TMEM9;COLEC12;STOML1;PDSS1;XYLB;EDEM1;EDEM2;PIGX;TMEM43;SUMF1;TMEM70;EXTL2;TMEM11;NFE…
LMO2-20887958	154	1741	0.0887608	0.0413903	0.0473705	2.51505e-17	0.0877473	-3.35385	UNC50;ORAI2;VOPP1;SAR1B;JAG2;FUCA1;ACHE;KCNC1;PANX1;GSTP2;ADAM23;LAPTM4A;MAP3K6;FBXW7;TPST2;TMEM120B;SPRN;MCFD2;ITGAV;SEZ6L;TNFRSF21;SST;ST7;SLC23A2;BSG;NEU1;NTNG1;PTK7;CALR;FBXL2;GRIK1;KIT;OS9;ORMDL3;PDCL3;2610524H06RIK;GRINA;IGF1R;FAM198A;GNPTAB;ENPP5;SIDT2;SLC41A3;DEGS1;DYRK3;SUN1;ATP6AP2;AGPAT5;RALB;AGPAT3;TMEM205;CCS;H13;FANK1;GRP;IL10RB;G0S2;ANKRD13D;IFNAR2;SLC26A8;EMILIN1;RFC2;BPGM;DAD1;DN…
STAT3-20064451	103	2202	0.059366	0.05235	0.00701595	0.111066	1.53197	-3.3667	CRHBP;CXADR;DDIT4;EIF2AK3;LGMN;KCNC1;KCNA2;DGAT1;FBXW7;ATP11B;TPST2;IL6ST;BLM;ADORA2B;TNFRSF21;NTRK2;PTGFRN;SLC45A1;B4GALNT4;GBA;ORMDL3;TRDMT1;IGTP;LRPAP1;SEH1L;ST3GAL6;NDFIP1;PLXNC1;FKBP9;IFNAR1;NSG2;CPD;THA1;DNAJC1;IL21R;IFRD1;CASZ1;FUT10;ATP6V0A1;SLC35F5;CYP7B1;XPR1;TMEM2;CDH18;TMEM30A;SLC4A7;ATP13A3;UXS1;CLDN5;THY1;PIGT;WFIKKN2;PIGC;EXTL3;CTGF;SLC9A8;SLC9A9;RASGRF1;PPM1L;FURIN;LRRC8C;EPHB6;SL…
TAL1-20887958	181	2067	0.104323	0.0491406	0.0551822	7.89107e-20	0.077674	-3.41656	ORAI3;UNC50;DDIT4;ORAI2;RDH14;JAG2;ACHE;KCNC1;OLFML2B;LAPTM4A;MAP3K6;ATP11B;FBXW2;TPST2;MCFD2;TNFRSF21;BSG;MOGS;ALG1;MFSD11;KCNN1;CALR;HERPUD1;SDF4;KIT;MGAT5;ORMDL3;MGAT2;PNPLA7;PDCL3;ADAM10;SLC41A3;ODF2L;UBE2S;DYRK3;AGPAT5;TMEM203;TMEM206;GALNS;BC004004;NDFIP1;H13;LDLR;OSTM1;CYP20A1;AUP1;SLC39A9;SLC39A1;IFNAR1;INSIG1;TPP1;UFSP1;EMILIN1;BPGM;LEPROT;DNAJB9;SLC35B2;SLC35B4;NFU1;POR;LIAS;UGCG;SLC35F…
FOXP3-17237761	14	257	0.00806916	0.00610988	0.00195928	0.190115	2.12689	-3.5309	EXT1;NRP1;PTPRK;SUMF1;CD44;MGAT5;PARK7;GRB14;FAM3C;SCN8A;FBLN5;SGCE;DAD1;LRIG1
EGR1-19032775	15	276	0.00864553	0.00656159	0.00208395	0.182149	2.11883	-3.60822	IFITM2;EPHB1;ITM2C;PTPRO;PRSS23;CCKBR;PNMA1;SNX25;TM9SF2;ZDHHC9;PPIH;MCHR1;KDSR;BMP4;DEGS1
EP300-21415370	80	1014	0.0461095	0.0241067	0.0220028	1.37096e-07	0.250344	-3.95608	SPINT2;RDH14;CP;GPR22;PANX1;LGR6;OLFML2B;CTGF;IL6ST;GRIA1;CXCL12;TBXAS1;MCFD2;DGCR2;TNFRSF21;FURIN;CNNM2;SPON1;EPHB3;EPHA4;EXT1;DDR1;NRP1;NRP2;GRIK4;PTPRK;PCSK5;SORCS2;SFI1;POPDC3;MGAT5;IGF1R;SLC30A5;SNTG2;IGF2R;RALB;SLIT2;FLRT2;FLRT3;CHST12;PAM;ELN;ADAMTSL1;RSPO2;TM9SF4;TM9SF3;SULF2;SMOC2;NFIB;ABHD12;CDH2;TAP2;STIM2;INSIG1;OSBPL2;CYP51;C1QL2;APP;CISD2;NFU1;DAG1;SLC6A17;ANKRA2;FUT10;NTSR1;VASN;VL…
SOX2-19030024	82	863	0.0472622	0.0205168	0.0267454	3.85039e-11	0.16842	-4.03877	CYB5R1;EDEM1;EIF2AK3;KCNC1;SRPR;MESDC2;SLC39A14;PSMA1;TMEM70;SLC7A3;EXTL2;CSE1L;GPR61;CTGF;FBXW2;SLC9A2;IL6ST;GRIA3;IGSF11;CXCL12;ECE1;ITGAV;PPP1R15B;HSD17B11;NDUFA4;TSPAN13;SLC12A9;ALG9;ALG2;EPHA3;SYNGR1;NTNG1;EXT1;PTPRO;HERPUD1;RELN;MGAT2;CELSR2;SLC30A7;KCNV1;EBP;SNTG2;BMP4;ZMYND19;LMBRD2;TAF12;HS3ST1;GLB1;ERCC5;RPL5;LRPAP1;GLG1;FLRT3;SQLE;GPR180;PCDHB5;LFNG;SSR2;GABRA5;SULF2;NFIB;ABHD13;RPS9;S…
KLF4-18555785	197	2444	0.113545	0.0581033	0.0554413	6.39922e-18	0.102075	-4.04117	NUP107;HEMK1;UNC5A;UNC50;NR2F6;TSPO;CHST8;MMP17;ERGIC3;WNT7B;SNX14;PLOD1;MAP3K6;DGAT1;APOA1BP;TPST2;LY6H;ACP2;E2F1;TSPAN14;ICAM5;FBXO6;ALG6;TRIM13;TMEM63C;SDC3;SYNGR1;NTNG2;CALR;FBXL6;DHRS13;SDF4;CANX;GABBR1;SORT1;KCNS3;NEK11;IGF1R;GNPTAB;UBE4A;ADAM17;PPIH;PPIB;PLD3;CACNA1H;SYT1;DYRK3;TAPBP;RER1;AGPAT5;AGPAT4;TTC13;GALNS;CCS;BC004004;SEH1L;ICMT;SQLE;FANK1;ELMOD2;GRN;SLC17A5;OSTM1;PARK7;SLC39A6;FK…
SALL1-21062744	6	105	0.00345821	0.00249626	0.000961958	0.277361	3.34713	-4.29248	OMD;NPTX2;GRIA4;PHTF1;GSTP2;DCBLD1
MYC-20876797	121	1406	0.0697406	0.0334261	0.0363146	4.47934e-13	0.155086	-4.40975	UXS1;LACTB;JAG1;EDEM1;MRPL23;SLC39A10;TMEFF2;EXTL3;TSEN2;MAP3K6;FBXW7;OLFM2;TXNDC5;BDNF;IGSF11;CNTNAP1;BOC;EDIL3;ADAMTS20;MET;ST6GALNAC5;LRP1;SLITRK1;ATP9B;ATP9A;NTRK2;PCDH7;NELL2;ST7;ICAM5;BCAP29;SLC12A9;EPHA4;EPHA7;ALG6;PCDH10;ARSK;PTPRU;PTPRK;VKORC1;AGTRAP;SORCS2;RGMA;KIT;TLCD1;SFI1;COL19A1;PERP;PDGFRA;NPNT;SEL1L;CACNA1C;SLC1A6;MCHR1;CACNA1H;KCNV1;WNT2;SYT4;CNTN6;BMP4;SDK1;MANSC1;CNTN4;GRM7;GR…
CTNNB1-20460455	98	988	0.0564841	0.0234886	0.0329956	4.40853e-14	0.146617	-4.50887	PGAP1;NDST3;FN1;GRIN2B;WFIKKN2;TMEM51;TMEM43;SMPD1;PSMA1;FSTL4;KCNB2;TMEM57;LGR4;SLC16A3;GRIA4;PTPRE;TMEM11;ECE1;DGCR2;NRG2;MET;LRP1;FYB;ATP9A;PCDH9;PCDH7;P4HB;TXNDC16;EPHB2;SCN1A;MOGS;ZMPSTE24;DYM;ZBED5;SCN2A;PCSK5;HERPUD1;CTSB;SORCS3;PNPLA7;ESYT2;TMX2;FAM173A;SLC1A1;CACNA1A;SYT1;SDK1;FAM151B;SDK2;GRM7;TIMM17A;PLA2G4A;AGPAT4;ERCC5;NHLRC3;GLG1;ST3GAL6;GALNTL6;PAM;SSR4;NPSR1;ADCY8;ERMP1;LDLR;RNF13…
CDX2-20551321	28	504	0.0161383	0.011982	0.0041563	0.0796479	1.80188	-4.55901	DDIT4;SAR1B;MRPL23;DSCAML1;LAPTM4A;EFEMP1;ATP11B;IL6ST;RTN4R;ADORA2B;ATP9A;CNNM4;SPON1;IGSF3;PTPRN2;SLC35E3;GRIK4;CTSB;CACNA1G;BFAR;MANSC1;PEX3;RALB;ACVR1B;NCAM2;SLIT2;CD9;ERCC5
GATA3-20176728	80	834	0.0461095	0.0198274	0.0262821	4.39373e-11	0.202349	-4.82567	SPINT2;UNC5C;RETSAT;EDEM3;EIF2AK3;HYOU1;CHST8;SLC7A4;PSMA1;GPR45;SLC7A1;FSTL4;WNT7B;PLOD1;CXCL14;CTGF;HSP90B1;LRRC4B;TMEM17;ITGAV;GRID1;ITGA7;LRRC8D;SLC12A4;NELL2;TXNDC12;ARSA;ENTPD3;TMEM63B;SLC45A1;HERPUD1;SDF4;CTSF;CANX;CREG2;DPAGT1;CYP46A1;IGF1R;DNAJB12;NXPH2;CACNA1B;SNTG2;STT3A;PODXL2;LAMC1;SYNGR3;CLN8;SV2B;ATP2B4;ACVR2A;CLCN7;ENDOD1;SSR1;SQLE;SLC6A7;PPT1;EMB;AI987944;KTN1;SULF2;TMEM39B;CLSTN…
EGR1-19374776	4	68	0.00230548	0.00161662	0.000688853	0.318952	4.30214	-4.91612	SMPD1;VAV1;NPM1;CALR
STAT6-20620947	29	508	0.0167147	0.0120771	0.00463757	0.0588255	1.73801	-4.9241	SPINT2;HEMK1;NUP210;GLG1;GPR17;TMEM43;IL1RAP;BSCL2;PTPRE;FURIN;SORL1;NELL2;ARL6IP5;PTPRN2;INSR;UBAC2;FAM69A;TLCD1;CD44;MGAT5;MPZL3;IGF1R;NRCAM;SDK1;CDH13;SLFN5;SLC3A2;PRRG2;GLB1
DMRT1-21621532	8	132	0.00461095	0.00313815	0.0014728	0.192197	3.03674	-5.0083	SIL1;EPHA7;ALG2;1700021F05RIK;CKS1B;SLC39A10;AGPAT3;ADAM23
TRP63-18441228	9	143	0.00518732	0.00339966	0.00178766	0.150406	2.75792	-5.22465	WSB1;PTGES;UGCG;TMEM19;CKS1B;CTSB;ELOVL4;PERP;SULF2
HCFC1-20581084	19	306	0.010951	0.0072748	0.00367621	0.0603786	1.88266	-5.28484	SLC35B4;FBXO8;IFRD1;ARSK;B230118H07RIK;MRPL34;TMEM43;RNF167;ORMDL3;TMCO3;ERH;SHARPIN;TMEM129;SYT3;GPR108;TMEM101;ACP2;THA1;PRRG2
SCL-19346495	16	252	0.0092219	0.00599101	0.00323089	0.0689008	2.00163	-5.35453	PAQR7;POR;RPN1;PTPRJ;VAV1;SLC7A8;SFI1;CD83;IFNAR2;BLM;SLC41A3;ADAMTS20;ANK;SEMA4D;ACVR2A;CD9
E2F4-17652178	54	1002	0.0311239	0.0238214	0.00730251	0.0349143	1.64651	-5.52382	NUP107;PANX1;MESDC2;PSMA1;PLXDC1;SLC9A6;BLM;NFE2L1;ACP1;NCLN;ATP9A;ZDHHC5;ZDHHC6;FBXO8;ALG8;NEU1;MRPS11;PGRMC1;NPM1;SLC30A7;PPIH;UBE2S;RER1;SLC3A2;ATP2B4;RNF121;CHST12;SSR2;GRP;LMAN1;TEX2;STIM2;SERINC1;RAD9B;CCDC34;RFC2;DNAJC3;POLR2H;POLR2K;PPIL3;ARL6IP6;PTDSS1;DNER;TMED5;MANBA;SLC20A1;CXCR4;SPCS2;GOLT1B;TMEM38B;TDRD3;HS2ST1;CHMP6;SSBP1
SMAD-19615063	8	124	0.00461095	0.00294796	0.00166299	0.153938	2.9613	-5.54119	SYNGR1;BDNF;PRR7;SLC35F2;THBD;TRPC4;ADORA2B;SEMA4B
HTT-18923047	35	566	0.0201729	0.013456	0.0067169	0.0159413	1.34705	-5.57522	SCAMP5;RPN1;GJB6;ELOVL4;ELOVL2;PCYOX1;ABCB1A;TUSC3;PARK7;CLU;TM7SF2;ABCA8B;MAG;MUSTN1;CSPG5;DPP10;TNFRSF21;FKRP;PCDH8;GPM6A;CD99L2;PTPRR;UCHL3;VAV1;MATN2;POPDC3;XDH;APLP2;SCG2;CACNA1B;WNT6;MAN2B1;CDH11;ATP2C1;SPOCK2
ESR1-15608294	6	98	0.00345821	0.00232984	0.00112837	0.230778	3.83177	-5.61853	COMT;EFEMP1;SDC3;CNTNAP1;SIRT3;PGRMC1
TFAP2C-20629094	113	1203	0.0651297	0.0286	0.0365297	1.44569e-14	0.177516	-5.65703	NUP107;ORAI3;VOPP1;LETMD1;SAR1B;MRPL21;HEXA;LMBR1;SLC39A14;SLC7A8;FSTL4;LGR6;DGAT2;FRMD3;MAG;SLC9A8;TXNDC5;IGSF11;TBXAS1;ITGA3;TNFRSF1A;ITGA6;PPM1L;FURIN;LRRC8D;LRRC8A;ATP9A;CNNM4;NTRK2;SLC12A4;TSPAN14;NAGK;SYT12;TMEM63B;PTK7;PCSK2;PTPRU;PTPRS;CTSZ;TECR;QSOX2;CANX;CD55;IL34;ESYT2;FAM171B;ESYT1;CD81;CELSR2;IGF1R;PLAU;SIDT1;SLC41A3;KCNV1;FUT8;CALHM2;SDK2;ZMYND19;MAN1B1;SLC3A2;MBTPS1;LNX1;CD9;CHPT1;…
CUX1-19635798	182	3052	0.104899	0.0725578	0.0323413	1.01094e-06	0.415624	-5.73754	SPINT2;NDST2;RDH11;EIF2AK3;L1CAM;TBL2;FXYD6;LGMN;ACHE;SLC39A14;TMEFF2;ADAM22;LGR6;CRLF1;LAPTM4A;NUDT14;ATP11B;FBXW2;TPST1;BLM;GRIA3;TBXAS1;GRID1;TNFRSF21;HCRTR1;GRIK2;HERPUD1;CRTAC1;EEF1E1;GBA;XDH;GABBR1;SORT1;PCDHB15;PCDHB13;KCNS1;PCDHB16;NEK11;RPP30;DNAJB12;ADAM10;PPIH;PPIB;PHTF2;TNFAIP6;PHTF1;ATP6AP2;TAPBP;SLC3A2;NT5C3;NCSTN;PPT1;PCDHB5;PCDHB3;PAM;SLC17A8;LDLR;PARK7;CLU;SLC39A9;SLC26A10;SLC39A…
GABP-17652178	55	1001	0.0317003	0.0237976	0.00790265	0.0249763	1.55987	-5.75567	NUP107;HEMK1;SNF8;MRPL21;PIGT;SRPR;PIGC;TMEM68;TMCO1;TMEM59;ATP11B;ACP2;NCLN;OCIAD1;ZDHHC6;FBXO8;ZMPSTE24;SURF1;YIPF4;DPAGT1;SLC30A7;SLC30A6;UBE4A;PPIH;TAF12;RNF121;NCSTN;SSR2;RNF167;ANKRD13D;SLC39A9;RPS5;ANKRD42;GLT8D1;M6PR;SERINC1;RFC2;BPGM;POLR2H;POLR2K;SLC35A2;PPIL3;SLC35C2;MRPS18C;SLC33A1;HINT2;USMG5;CBR4;BFAR;RBM3;TMEM101;STOML2;TM2D1;TMEM30A;SSBP1
SOX2-16153702	68	1278	0.0391931	0.030383	0.00881009	0.0251379	1.57818	-5.81305	CACNA2D1;RDH11;ABCA5;FXYD5;LETM2;SLC7A5;MMP16;CTGF;KCNH5;SLC9A2;OLFM2;SLC9A9;B3GALT4;NDUFB8;SLITRK5;PCDH8;NELL1;EPHA4;SFRP2;APH1A;KCNN2;CALR;MRPS11;PCSK5;COMMD3;PNMA1;CREG2;SORT1;DPAGT1;PSEN2;CACNA1A;PRNP;BMP7;TNFAIP6;SLC3A2;AGPAT4;CLN3;TAF12;COL12A1;ICMT;ADAMTSL1;SSR4;ELMOD1;SF3B5;SULF1;CDH9;CDH6;CDH2;SLC39A1;SLC15A2;IGFBP2;FKBP7;LRFN3;SLC24A2;SLC24A3;TRIT1;APP;SYNPR;STXBP2;CD99L2;LIAS;TRAM1L1;S…
RUNX1-20887958	102	1120	0.0587896	0.0266267	0.0321629	1.59433e-12	0.234495	-6.36995	SCAMP5;ORAI2;ASPHD2;ABCB8;CYB5R1;JAG2;ABCA2;LRRC32;MMP14;ADAM23;TMCO1;ZFP688;MAP3K6;NOMO1;TPST2;BCDIN3D;MCFD2;TMBIM4;SEC22C;OGFOD2;EPHB2;PAQR7;ZFP1;CALR;FBXL2;GPAA1;CD34;DERL2;CREG2;DOHH;ESYT1;RAMP1;SCARB2;CD81;PDGFRB;FAM173A;SLC41A3;4932438A13RIK;PRNP;DYRK3;TMEM222;SSTR2;RCN3;CREB3;AGPAT5;RALB;AGPAT3;TMEM203;CCS;CREB3L1;H13;TCTN1;EMB;IFNGR2;GRN;TM9SF4;RPL18;LPCAT2;ATP8A2;NAGLU;IFNAR2;RPS9;TAP2;I…
THAP11-20581084	80	864	0.0461095	0.0205406	0.0255689	2.05873e-10	0.289328	-6.45311	ABCB8;RDH14;PIGO;MRPL34;MRPL32;TMEM43;PIGC;ADAM22;TMCO3;TMEM59;NOMO1;DGAT1;SLC9A8;SLC9A1;TMEM11;POMT2;POMT1;ACP2;NCLN;CTNS;TXNDC12;ZFP1;TMEM63B;ARSK;DYM;B230118H07RIK;CTSB;DERL1;ORMDL3;TCEA2;DNAJB12;PLD3;SHARPIN;SYT3;CREB3;LMBRD2;TTC13;CLCN7;THYN1;MED4;RNF121;ANAPC10;GLG1;SERPINI1;CYB561D2;COQ10A;BACE1;CLDND1;RPS3;RPL18;TOR2A;AUP1;GPR108;M6PR;ZFP112;THA1;DAD1;SEC11C;SLC35B2;VEZT;SLC35B4;IFRD1;ANK…
POU5F1-16153702	38	622	0.021902	0.0147873	0.00711467	0.0146867	1.53102	-6.46214	COL12A1;CACNA2D1;MRPL13;ICMT;ADAMTSL1;MMP16;GABRA5;SULF1;CTGF;KCNH5;OLFM2;B3GALT4;LRFN3;IL1RAPL1;SLC24A2;SLC24A3;NELL1;ZDHHC6;SYNPR;EPHA4;SFRP2;CD99L2;ZMPSTE24;KCNN2;COMMD3;GFRA1;AMIGO2;GPC3;CACNA1G;BMP7;BAMBI;FGFR1;LRRTM3;MMP2;PLA2G4A;THBS2;TMEM30A;TAF12
ESR1-20079471	15	216	0.00864553	0.00513515	0.00351038	0.0427198	2.07681	-6.54838	MED4;BCAM;LMAN2L;IGSF3;SCAP;GRIK4;ZDHHC16;CD55;SLC9A8;TMEM121;DHCR24;ABCD4;SLC24A3;SEMA3C;SYT12
EST1-17652178	59	1001	0.0340058	0.0237976	0.0102081	0.00595938	1.2987	-6.65297	NUP107;LETMD1;RDH11;MRPL22;MRPL32;ERGIC2;TMEM59;TMEM11;ACP2;ACP1;TMBIM4;NCLN;OCIAD1;ZDHHC5;ZDHHC6;FBXO8;ZMPSTE24;GBA;ORMDL3;DPAGT1;RPP30;BCCIP;DNAJB12;UBE4A;SEL1L;ERCC5;RNF121;GLG1;PPT2;RNF167;RPL11;SLC17A7;SYVN1;WDR12;SLC39A9;RPS9;FKBPL;RPS5;ST7L;ANKRD42;M6PR;LRFN3;LSM8;SERINC1;EMILIN1;DAD1;POLR2H;POLR2K;PPIL3;SLC35B4;SLC35B1;LIAS;TOMM40;CBR4;SPCS2;TMEM115;CKS1B;RBM3;TMEM101
GATA1-19941826	78	967	0.0449568	0.0229893	0.0219674	8.58765e-08	0.412495	-6.71143	LIPA;UNC5A;DDIT4;ORAI2;COL1A1;TBL2;ACHE;PIGC;SLC7A5;SLC7A8;CHST2;RIC3;FADS3;KCNH2;FBXW2;TMEM120B;HPS1;BCDIN3D;CNTNAP1;ECE1;SEC22C;FURIN;TSPAN33;BSG;SLC12A7;ACVR1;SLC45A1;TSPAN7;LRRN2;MRAP2;DDR1;DHRS13;PTPRJ;CTSB;RELN;CD83;PSEN2;SLC1A4;CACNA1I;CAV2;DEGS1;SDK2;DYRK3;CLCN3;CLN8;AGPAT4;ATP2B4;GLB1;CHPT1;ASTN2;GPR182;SSR3;ASAH1;RNF130;CYB561;SLCO2B1;FKBPL;INSIG1;PSAP;DHCR24;LRFN2;TRPC4;VSTM2L;DAGLB;LE…
SALL4-18804426	81	1006	0.0466859	0.0239165	0.0227694	5.21203e-08	0.416542	-6.98529	KCNC1;LMBR1;SLC39A10;SLC39A14;TMCO1;CTGF;KCNH2;CPA2;FBXW7;FST;MINPP1;IL6ST;NPTXR;IGSF11;ACP1;ITGA3;TNFRSF21;E2F1;NELL2;ACVR1;KCNQ5;PNMA1;ORMDL3;PCNX;PCDHB16;PLAT;GNPTAB;CAR4;PDGFRA;MCHR1;WNT4;DYRK3;CREB3;CLN8;CLCN3;CLCN2;AGPAT4;SPOCK1;FAHD1;MBTPS2;BCAM;LRPAP1;NDFIP1;PAM;FANK1;PRSS23;EMB;ELMOD1;ASAH1;SULF1;KTN1;NFIB;SLCO4C1;TEX2;ANKRD42;LSM8;P4HA1;THBD;GPX7;ASPH;ANK;LEPROT;POLR2H;PTPN12;ACSL5;ATP6…
POU5F1-18700969	48	567	0.0276657	0.0134798	0.0141859	7.91744e-06	0.600362	-7.05212	ZFP296;LRPAP1;THY1;MRPL13;PIGO;EMB;TMC6;SLC39A14;SLCO4A1;SLC7A3;SPP1;AI987944;TOR2A;PARK7;IGFBP2;TEX2;ARMCX1;ADAM9;SGCE;ATP9A;SLC12A4;SLC23A2;IFITM1;IFITM2;TXNDC11;ZDHHC6;SLC12A7;ALG8;SLC6A15;CPT1C;TRIM13;PTGES;IGSF8;APH1A;CIDEA;CDS2;COMMD3;KIT;GBA;SCARB2;OSTF1;PLD3;PHTF2;SLC2A1;CREB3;CLCN3;PDLIM7;MBTPS2
BP1-19119308	1	18	0.000576369	0.00042793	0.000148439	0.536122	11.744	-7.32114	PTPRE
CTNNB1-20615089	42	637	0.0242075	0.015144	0.00906354	0.00327008	1.29273	-7.39822	ALKBH6;CADM3;MRPL21;GNPTG;CYB561D2;SEZ6;TMCO3;MAP3K6;ST7L;TPST2;ERP29;DDRGK1;PCDH1;SLC12A5;PCDH9;NFASC;SPON1;EPHB3;SLC35C2;ALG1;JMJD8;TMEM63C;SDC3;PTDSS2;PTPRN2;GRIK5;FRG1;MGAT2;MAS1;ABCG1;CACNA1B;PLD3;PI4KA;STT3A;EBPL;FGFR1;CREB3;MAN1B1;OPRL1;CLN3;SPOCK1;CD9
TCF4-18268006	48	470	0.0276657	0.0111737	0.016492	6.02783e-08	0.448157	-7.45029	PGAP1;HTR6;CACNA2D3;RETSAT;SLC19A2;RNF103;B3GALT2;SSR2;SLC39A10;MANEAL;PIGC;COL16A1;CLSTN1;TNR;SLC9A2;PLXNA2;FANCL;SCCPDH;DPP10;ACP1;C1QL2;ITGA6;SEMA3F;MBOAT2;MERTK;EPHB2;ARL6IP6;EPHA4;ACSL3;CASZ1;SLC45A1;NRP2;HYAL2;MPZL1;ATP1B1;SCG2;PSEN2;CNTN6;EFNA1;HS2ST1;GRM7;JAGN1;PLA2G4A;RALB;ATP1A1;SCN7A;TTC13;ATP2B4
RCOR1-19997604	134	2378	0.0772334	0.0565342	0.0206992	0.000297691	0.917944	-7.45321	POP4;UNC5A;CACNA2D1;JAG2;JAG1;HYOU1;GSTO1;SLC7A4;SLC7A8;SNX25;COL3A1;OLFML2B;ATP11B;MINPP1;HTR1A;IGSF11;NEO1;TSPAN14;TSPAN13;C1GALT1C1;FBXO8;TRIM13;EXT1;FBXL4;RAB9;GRIK2;SDF4;KIN;EEF1E1;FJX1;PCDHB20;MGAT2;PCDHB14;VEGFC;PCDHB10;PCDHB17;SIDT2;CACNA1B;SYT4;CRTAP;SYT1;CNTN4;PHTF2;PHTF1;GRM5;NUP210;SEH1L;ANAPC10;ICMT;PCDHB5;PCDHB4;ABCC10;OSTM1;NFIB;CLCC1;PLXNA1;OSBPL2;CSPG5;PLA2G12A;DAD1;SLC35A3;AMFR;…
ZIC3-20872845	40	365	0.0230548	0.00867746	0.0143773	1.40864e-07	0.483784	-7.63192	ARL6IP1;DAG1;CACNA2D1;DDIT4;LRRN2;CIDEA;SLC6A7;ITM2A;PIGT;EMB;AGTRAP;COMMD3;SLC39A14;CD47;CHST2;SLC7A3;PDPN;SLC17A5;VEGFC;SLCO4C1;ABCA8B;IL6ST;PORCN;ZFP57;THPO;TDRD3;BAMBI;SLC26A8;LRRTM3;GRM8;TAPBP;RTN4RL1;AGPAT5;COLEC12;THBS2;SLIT1;GALNT1;AQP11;MBTPS2;HCN1
MYCN-21190229	27	373	0.015562	0.00886765	0.00669431	0.00541849	1.48652	-7.75656	SLC6A15;MRPL13;MRPL21;MC4R;ELMOD1;MANEAL;PCDHB10;PLXNC1;TMEM38B;TAP2;TEX2;MPEG1;STIM2;SLC9A8;TBXAS1;JAGN1;GRID1;ASPH;RFT1;CDH18;AGPAT5;CLN6;NCLN;NDUFA4;PCDH7;CLCN6;CHPT1
PPARG-19300518	21	272	0.0121037	0.00646649	0.00563726	0.00688613	1.58526	-7.8918	SLC5A6;POR;HSD11B1;ABCA2;CD47;CHST2;ORMDL3;G0S2;SCARB2;DGAT1;SLC9A6;ERP29;LPL;CAV2;UBE2S;THBD;EMILIN1;SEMA3F;LTC4S;MGAT4B;CHPT1
NR4A2-19515692	16	207	0.0092219	0.00492119	0.00430071	0.0166323	1.96226	-8.03823	ACSL3;GPM6A;PTPRU;SRPR;MMP16;SFI1;GABBR1;BCCIP;CAR10;LMTK3;PLD3;DPP6;CPE;HAPLN4;ATP1A3;LNX1
TP53-16413492	40	449	0.0230548	0.0106745	0.0123803	1.51018e-05	0.725943	-8.05847	WSB1;DKK3;CLDN5;DDIT4;ASTN2;ABCB9;CHST12;EIF2AK3;FANK1;GAS6;GRP;PTGS2;FST;IFNAR1;SLC4A10;PTPRE;NEO1;ADORA2B;NLGN1;SLITRK1;SLC12A4;PCDH7;PTGFRN;PTPRO;PTPRM;SPTLC1;SORCS3;SORCS2;FAM20A;TLR3;GPC3;PCNX;SUSD1;GALNT11;CHCHD7;ADRB1;DYRK3;GRM5;TMEM30A;HS3ST1
HOXB4-20404135	141	1824	0.081268	0.0433635	0.0379045	7.94725e-12	0.320225	-8.18437	POP4;RDH11;EIF2AK3;TBL2;HYOU1;SLC39A10;ATAD1;SNX14;ATP11B;BLM;AP4S1;HTR1A;PCDH7;ICAM5;FBXO8;ALG8;ALG9;NEU1;EXT2;CALR;FBXL4;B230118H07RIK;SDF2;ORMDL3;MGAT2;SORT1;TCEA2;DNAJB12;UBE4A;ADAM17;DHRS7B;UBE2S;PHTF2;DYRK3;PHTF1;LRPAP1;PPT1;PCDHB4;SYVN1;WDR12;OSTM1;SLC39A6;FKBP7;PLXNA2;CPD;TPP1;DNAJC1;POLR2F;VEZT;IFITM2;SLC35B1;DAG1;SLC35A5;ZNHIT1;ATP6V0A1;DNER;TMED2;TMED1;TRPV2;LRP10;HS2ST1;TMEM2;STOML2;P…
ZNF274-21170338	25	327	0.0144092	0.00777405	0.00663517	0.00384801	1.508	-8.38479	WSB1;ZMPSTE24;TRPM4;LRRN3;MC4R;SPTLC1;MMP17;DSCAML1;RABAC1;SUSD1;SPCS1;MEGF8;TMEM145;FBXW2;SEL1L;SEL1L3;MBIP;CLK4;LRFN5;CXCL12;STT3B;DNAJC1;DAD1;NTRK3;OCIAD1
ESR1-21235772	18	228	0.0103746	0.00542044	0.0049542	0.00961309	1.8272	-8.48668	VASN;GFRA1;CD44;PNPLA7;ANKRD13D;PLOD2;CELSR2;DSCAM;ATP1B1;BMP7;EFNA1;SLC2A1;ABCC5;SEMA3E;ATP2C2;SLITRK4;SLIT2;GLA
SETDB1-19884257	187	2353	0.107781	0.0559399	0.0518411	1.79056e-16	0.234788	-8.51315	ENDOG;JAG2;PRPF38B;FUCA1;D430041D05RIK;NR2F6;FXYD6;CHST8;SLC39A10;SLC7A8;CHST2;SLC7A3;AGRN;OLFML2B;PLOD2;FBXO17;AP4S1;BOC;ITGA3;TMBIM6;ITGA6;TNFRSF21;KCNJ9;PCDH7;HTR5A;SST;SYT11;ALG8;KCNK12;SLC45A4;SDC3;SYNGR1;NTNG2;EXT2;FBXL4;MRAP2;DHRS13;WFDC1;HERPUD1;OS9;PCDHB14;TCEA2;2610524H06RIK;CELSR2;IGF1R;ADAM17;IGF2R;DEGS1;DYRK3;PODXL2;PHTF1;AGPAT5;SLC3A2;AGPAT4;TMEM201;SPOCK2;SPOCK1;FAHD1;MRGPRE;SQLE;E…
SOX2-18555785	35	497	0.0201729	0.0118156	0.0083573	0.0026217	1.44359	-8.58063	ATG10;CLDN5;SSR2;SLC39A10;SLC39A14;SPP1;RPL18;SULF2;SLCO4C1;LGR6;LGR4;CTGF;ZFP560;RPS9;IL6ST;PORCN;POLR2J;IFITM2;ARL6IP5;ALG8;KCNN2;CTSA;TMED4;TWISTNB;VEGFC;DPAGT1;ADAM15;ABCG1;PHTF2;LRRTM3;VGF;AGPAT5;THBS2;LGI2;AQP11
RARG-19884340	41	390	0.0236311	0.00927181	0.0143593	2.70764e-07	0.589689	-8.91729	ABCB8;ST3GAL3;NDFIP1;FN1;CP;COL1A1;PIGT;MRPL34;TMEM179;SULF1;PARK7;CTGF;DGAT1;TPST2;CYP2D22;OSBPL2;NDUFB8;PPM1L;LRP1;FURIN;NDUFA4;CTNS;GDE1;BSG;EPHB2;ARSA;IFRD1;CALR;NRP1;PTPRS;GRIK5;CTSB;FAM20A;IL34;LTBP3;TMEM127;CPSF4;EFNA1;LAMC1;MMP2;PDLIM7
NANOG-18700969	31	344	0.0178674	0.00817821	0.00968923	0.000108011	0.986211	-9.00734	IFITM1;IFITM2;ARL6IP5;PTGFRN;SLC6A15;ZFP296;LRPAP1;FN1;COL18A1;VLDLR;EMB;COMMD3;KIT;SLC7A3;ADAM23;SPP1;ABCB1A;SULF2;SCARB2;IGFBP2;ADAM17;ABCG1;CALCA;2510039O18RIK;SLC2A3;ITGA3;THBS2;NCAM1;SLIT2;AMFR;PCDH8
EP300-20729851	141	2093	0.081268	0.0497587	0.0315093	3.56111e-08	0.529309	-9.07797	UNC5C;DDIT4;JAG1;EIF2AK3;FN1;KCNC3;SLC39A10;MMP16;GOLM1;WNT7B;PLOD1;FADS3;LAPTM4A;KCNH2;FST;FBXW2;TBXAS1;ITGB8;SEZ6L;TNFRSF21;TSPAN33;TSPAN14;SST;SLC23A2;ADCYAP1R1;EXT1;PTK7;NRP1;GRIK1;MC4R;RELN;ORMDL3;VEGFC;IGF1R;CAR4;SLC41A3;CACNA1G;IGF2R;AGPAT4;SLIT1;NUP210;FLRT3;FLRT1;ST3GAL5;PAM;TIMP2;OSTM1;NFIB;PCYOX1L;PLP2;RTN4R;PLXNA2;TMEM132D;CSPG5;PLXNB2;BPGM;SYNPR;CASZ1;SLC22A5;SLC35E3;COL18A1;GFRA1;NF…
RCOR2-21632747	31	401	0.0178674	0.00953332	0.00833412	0.00119449	1.36884	-9.21232	ZFYVE27;CHGB;ENDOG;UNC5A;ABCA3;L1CAM;SLC7A1;SULF1;SULF2;CDH8;KCNH2;FCGR1;IGSF21;THA1;VSTM2L;SEMA3E;DYM;KCNN1;SLC10A7;UBAC2;COL18A1;RGMA;FITM2;CLGN;NPY1R;SIDT1;SLC1A4;SYT1;SDK2;SLC2A1;NDUFS4
BMI1-19503595	62	661	0.0357349	0.0157145	0.0200203	1.43648e-08	0.514789	-9.29631	MRGPRE;METTL7A1;GPR162;SLC19A2;GABRB3;LRRC32;LFNG;SMPD1;CHST8;MMP14;ASAH2;SLC7A3;FLNA;SLC17A8;WDR12;CHRM1;CXCL14;DGAT2;RPS5;TAP2;DDRGK1;PSAP;PLXNA1;TMEM132D;FANCL;1600002H07RIK;NSG1;SERINC3;ITGA3;SEC11A;NDUFA8;NAGA;TM6SF1;MGP;CBLN4;NFU1;EPHA5;ENTPD2;SFRP2;SLC22A5;EPHA10;TMEM63C;TMEM50A;INSR;PTPRR;TMED1;TMED9;FIBIN;VWA1;PERP;QPCT;CD68;SLC30A5;SCG5;BFAR;IGF2R;LRRTM3;SSTR3;VCAN;CLN6;SV2A;CCK
SMAD4-19686287	31	405	0.0178674	0.00962841	0.00823902	0.0013812	1.41827	-9.339	BCAM;ABCA5;FANK1;SLC7A1;CLPTM1;CLSTN1;FST;ABHD2;PLXNA2;NFE2L1;CCDC47;EDIL3;FURIN;PTGFRN;PTGES;TMEM87B;SGPL1;PTPRU;PTPRK;PCSK5;TOMM40;CBR4;CD55;SUSD1;LTBP3;NALCN;FUT8;TDRD3;EFNA1;NPTN;SCN7A
POU5F1-18555785	41	555	0.0236311	0.0131945	0.0104366	0.000509241	1.24421	-9.4343	RPL5;MRPL13;JAG2;MRPL21;SLC39A14;LDLR;TMCO1;DHRS7;CLSTN2;TEX2;APOA1BP;TPST2;B3GALT4;TMBIM4;HSD17B11;SEMA4B;PPIL3;FBXO8;ARL6IP6;ALG5;MFSD11;CPT1C;SFRP2;CASZ1;SYNGR1;SCAP;SLC35F2;KCNT2;DNER;KIN;EXOSC8;METTL5;MTX2;SLC30A6;ABCG1;LRRTM3;MFSD3;CREB3;PEX3;MAN1B1;ATP1A1
PHF8-20622854	132	1490	0.0760807	0.0354231	0.0406576	4.97766e-15	0.289985	-9.55031	ENDOG;DDIT4;UNC50;TMEM126A;RETSAT;EDEM1;SFXN4;TMEM9B;HEXA;TMEM43;SMPD1;TSPO;SUMF1;SLC7A5;PIGG;TMEM70;TMCO3;CSE1L;SLC16A3;DGAT1;FBXW2;RNASEH2B;NPTX1;TXNDC5;TMEM11;CLPTM1L;NFE2L1;ELFN1;ACP2;TMBIM6;PPM1L;TXNDC12;TXNDC15;PTGFRN;SEC62;ALG8;ALG6;MFSD11;BTD;SYNGR2;ZBED5;ACER3;CALR;FBXL6;TECR;HERPUD1;CRELD1;CD55;NPM1;CD83;DNAJB12;PPIH;ODF2L;SHARPIN;STT3B;CREB3;CLCN2;CLN6;PDLIM7;TTC13;GALNS;RPL5;XYLT2;WDR…
STAT3-19079543	81	948	0.0466859	0.0225376	0.0241483	4.8085e-09	0.502118	-9.617	NDST2;CACNA2D3;PRRT3;SNF8;SLC7A4;SLC7A5;ERGIC3;EXTL1;WNT7B;TPST2;IL6ST;LY6H;ITGA3;PPP1R15B;PCDH1;CNNM4;SLC12A4;ACVR1;EPHA7;PCDH10;TMEM63C;DYM;TMEM86A;DHRS13;PTPRU;NRP2;CTSZ;GRIK4;PTPRM;HERPUD1;ORMDL3;PCDHB16;SLC30A7;PDGFRA;SLC30A5;SCN8A;WNT6;SDK2;GRM8;SSTR3;MAN1B1;ATP2B2;CLCN7;GLB1;COL12A1;XYLT2;ATG10;GNS;PRSS23;EMB;BACE1;LDLR;GABRA1;G0S2;AI987944;SULF2;TMEM39B;SLCO2B1;ABCA8B;THOC7;ZFP57;NSG1;CYP…
STAT4-19710469	117	1939	0.0674352	0.0460975	0.0213376	5.93006e-05	1.00733	-9.80425	POP4;HEMK1;KCNC1;SLC39A10;SLC7A4;MMP14;SNX25;DGAT1;FBXO17;ATP11B;TPST2;TPST1;IL6ST;1600002H07RIK;TBXAS1;ECE1;SYT11;ST7;OMD;KCNQ5;KCNN1;EXT2;CALR;DDR1;SDF4;SDF2;NEK11;RER1;SV2A;GALNS;NUP210;IGTP;1700021F05RIK;WDR44;TIMP2;PLP2;PARK7;SLC39A1;IFNAR2;CPD;SLC26A8;THA1;P2RX4;SLC35F5;GFRA1;AMIGO1;AMIGO2;AIG1;SPCS2;HFE;GM561;BMPER;HS2ST1;RBM3;STOML1;TMEM30A;PSME2;LETMD1;THY1;ABCA3;SNF8;TMEM51;PIGX;MESDC2;…
NR1I2-20693526	72	939	0.0414986	0.0223237	0.0191749	1.49884e-06	0.732765	-9.82698	SLC5A6;ABCA5;CP;TMEM51;ELOVL2;SLC39A14;AGRN;MINPP1;IL6ST;PTPRD;NFE2L1;IL1RAPL2;PPM1L;SYT12;ACVR1;ALG5;KCNQ5;BRI3BP;NRP1;PTPRJ;PTPRK;KCNT2;GAA;PGRMC1;EXOSC8;CYP46A1;IGF1R;SLC30A5;NPNT;MASP1;CACNA1G;GRM7;GRM8;HMGCR;CLCN3;TTC13;ATP2B2;ATP2B1;COL12A1;SEH1L;ST3GAL5;ST3GAL3;TRIM7;LMAN1;KTN1;SULF2;CHRM3;GRB14;CYP2D22;GPR108;LRFN3;LRFN2;THA1;ANK;NLGN1;SEMA4A;P2RX4;FAAH;POR;PTGES;LIAS;INSR;SLC35E3;COL18A1…
MYC-19079543	117	1458	0.0674352	0.0346623	0.0327729	6.54893e-11	0.419454	-9.83584	TMEM97;ALKBH6;NDST2;ABCB8;THY1;1110051M20RIK;EIF2AK3;FXYD6;HYOU1;TMEM43;GSTO1;SLC7A1;ADAM23;TMEM57;TSEN2;LAPTM4A;SLC16A3;FBXW2;SLC9A8;IL6ST;LY6H;TMEM11;CLPTM1L;NPC2;TM6SF1;P4HB;ARSA;PCDH10;SLC45A1;ARSK;TSPAN7;KCNN1;B4GALNT4;NTNG1;SURF1;TMEM86A;DHRS13;PTPRU;CTSZ;AGTRAP;RGMA;CANX;TLCD1;EEF1E1;EXOSC8;NPM1;CD68;SLC30A6;SLC30A5;PPIH;DHRS7B;STT3A;STT3B;PODXL2;TIMM17A;ATP6AP1;1810055G02RIK;AGPAT5;SLC3A2…
ESR1-17901129	41	444	0.0236311	0.0105556	0.0130755	5.4173e-06	0.815446	-9.88803	PCMT1;GNS;SLC19A2;EDEM1;SIRT3;DHRS7;LRG1;ABCA8B;ABHD2;DHCR24;CYP4F15;CXCL12;SLC26A8;NFE2L1;ADRA1B;EMILIN1;GPX7;LRP1;SEMA4A;SLC12A4;NDUFA4;FAAH;ICAM5;BSG;SLC35A5;ACSL5;TRIM11;PTDSS2;EXT1;RAB9;CTSB;TWISTNB;XDH;PDCL3;DPAGT1;CD81;TMEM14C;PSEN2;EFNA1;RRBP1;PSMB10
RUNX1-17652178	79	1003	0.0455331	0.0238452	0.021688	1.74592e-07	0.638534	-9.9361	MRPL22;MRPL32;PANX1;B3GALT2;SLC7A8;FSTL5;TMEM62;TMCO3;EFEMP1;DGAT2;FBXW7;FST;ATP11B;BDNF;TBXAS1;NFE2L1;POMT1;ACP1;MET;FURIN;NCLN;FBXO8;EIF1B;PCDH10;ZMPSTE24;HERPUD1;COMMD3;ORMDL3;NPM1;PCDHB11;NEK11;DPAGT1;SLC30A6;PPIB;SIDT2;CACNA1I;FUT8;BMP4;LAMC1;GRM7;RCN2;SLC3A2;HMGCR;SLIT1;ATP2B1;ACVR2A;WSB1;GLG1;NDFIP1;PCDHB4;PCDHB9;WDR44;SLC17A7;SLC17A8;KTN1;SLC39A9;TEX2;ST7L;STIM2;IGFBP7;DHCR24;LSM8;EMILIN1…
CDX2-19796622	34	334	0.0195965	0.00794047	0.0116561	5.15945e-06	0.81879	-9.96851	APP;SYNPR;DAG1;CACNA2D1;VDAC3;NEU1;ST3GAL3;ABCA5;MRPL23;RNF103;PAM;HEXA;ELOVL4;IFNGR2;ADCY8;IL10RB;SYVN1;ATP8A1;CIB2;BMPER;CDH2;WNT5A;XPR1;LRRC4B;SCCPDH;P4HA1;TMEM117;SGCE;SGCB;ITGAV;ABCC5;RCN2;TPBG;CBLN4
STAT3-1855785	51	572	0.0293948	0.0135986	0.0157962	1.06969e-06	0.733793	-10.0883	GCSH;ENDOG;PIH1D1;ATG10;ST3GAL3;FN1;NR2F6;SLC6A7;ELMOD2;NIPA2;ERGIC2;LMAN1;SULF2;CYB561;SLC9A2;IL6ST;1600002H07RIK;CYP51;THA1;HSD17B11;POLR2F;NDUFA8;SEMA4B;MGAT4C;P2RX4;ARL6IP1;ZDHHC6;NFU1;ARL6IP5;SEC63;EPHA7;ZMPSTE24;ARSK;SCAP;B4GALNT4;FBXL6;IER3IP1;TMED9;AGTRAP;CYP7B1;EEF1E1;SFI1;TWISTNB;LY6G6E;DNAJB11;PSEN2;SNTG2;LRP10;1810055G02RIK;HCN3;GALNS
MYCN-19997598	21	234	0.0121037	0.00556308	0.00654066	0.00135985	1.5452	-10.1989	COL12A1;TMEM97;EPHA5;NEU1;SCAP;GRIN2B;EXT1;FXYD5;DDR1;SORCS3;CCKBR;COL11A2;GABBR1;MAS1;CYB561;SLCO2B1;HS2ST1;SSTR2;NRXN2;ATP1A3;SPOCK1
NANOG-18555785	40	542	0.0230548	0.0128854	0.0101693	0.000602154	1.37605	-10.2034	CACNA2D1;RNF121;PRRT3;EIF2AK3;SLC39A14;COQ10A;SULF2;CTGF;SLC9A2;ARMCX1;ERH;IL6ST;RNASEH2B;ABHD2;PORCN;TMEM132D;CCDC39;PPP1R15B;LEPROT;AU040320;D930015E06RIK;CNNM2;SLC12A4;CBLN4;PTGFRN;TEX264;LRRN2;CRELD2;VEGFC;ALG12;TMEM131;BMP4;STT3A;ABCD4;PHTF2;CKS1B;LRRTM3;1810055G02RIK;CLN3;CHPT1
NANOG-21062744	79	840	0.0455331	0.01997	0.0255631	1.36959e-10	0.455194	-10.3381	SPINT2;CHID1;CLDN5;EIF2AK3;TBL2;GPR19;LMBR1;SLC39A14;MMP14;TMEM57;0610007P14RIK;MAP3K6;KCNH7;SLC9A9;PORCN;G6PC3;NFE2L1;ACP1;PPP1R15B;SLITRK5;SLC12A4;TSPAN14;SLC23A2;ICAM5;SEC63;TMEM87B;APH1A;EXT1;FBXL4;RAB9;CTSF;COMMD3;AGTRAP;CANX;OS9;SCARB2;SEL1L;SSTR2;LMBRD2;HMGCR;GALNT1;GLG1;FLRT3;FANK1;COQ10A;GRN;TM9SF4;RPL18;SIAE;SLCO4C1;PARK7;SYPL2;ARMCX1;ERH;ABHD2;ZFP57;SLC37A3;LEPROT;CCDC58;SLC35B4;TEX264…
ELF1-17652178	12	133	0.00691643	0.00316192	0.0037545	0.012922	2.38638	-10.3779	DPAGT1;GOLT1B;ZDHHC6;UBE4A;ERH;RNF121;RBM3;RNF167;TMBIM4;SF3B5;NCLN;ERCC5
SMAD1-18555785	52	610	0.0299712	0.0145021	0.0154691	2.81778e-06	0.819232	-10.4694	GCSH;ENDOG;DDIT4;ZFP296;FXYD6;GPR19;SSR2;SLC39A14;ADAM23;SPP1;SULF2;DGKE;SAT2;IFNAR2;ATP11B;SLC9A9;IL6ST;PORCN;ZFP57;CSPG5;DSE;ATP9A;SLC12A4;HTR5A;TSPAN14;IFITM1;IFITM2;ICAM5;ARSA;PAQR7;ZFP1;ALG6;LRRN2;AGTRAP;KIT;TOMM40;SLC20A1;TWISTNB;CD68;ATP1B1;TMEM131;NXPH3;SLC41A3;PSEN1;NFKBIA;LRP10;SLC2A1;SLC2A3;THBS2;PSMB10;CLCN6;MBTPS2
ZFP281-18358816	48	578	0.0276657	0.0137413	0.0139244	1.25799e-05	0.928534	-10.477	SCAMP5;ATG10;CYB5R1;SLC6A7;WFIKKN2;MRPL34;EMB;SLC17A7;SULF2;SLCO4C1;BDNF;TPP1;SPRN;ITGAV;THA1;ITGA3;PPP1R15B;PCDH1;PTPN12;DAG1;IGSF8;IGSF3;LRRN2;PTK7;ITM2C;PTPRU;HYAL2;SLC20A1;SUSD4;MPZL1;NFYC;BCCIP;WNT5A;DNAJB12;ADAM15;NXPH3;CACNA1H;CACNA1G;RHBDD3;DYRK3;ZMYND19;CREB3;TMEM2;LMBRD2;VGF;TMEM9;SLC3A2;KDELC1
KLF4-18264089	9	102	0.00518732	0.00242493	0.00276239	0.0324302	3.05627	-10.4789	CD83;PDGFRA;RPN1;SERPINA3N;BMP7;BMP4;NRP2;SLC2A3;TCEA2
KLF2-18264089	9	102	0.00518732	0.00242493	0.00276239	0.0324302	3.08515	-10.5779	CD83;PDGFRA;RPN1;SERPINA3N;BMP7;BMP4;NRP2;SLC2A3;TCEA2
HNF4A-19761587	79	1126	0.0455331	0.0267694	0.0187638	1.02227e-05	0.924799	-10.6268	NUP107;PGAP1;LETMD1;ABCA2;GPR17;PRPF38B;EDEM1;EIF2AK3;FN1;MRPL21;ACHE;SLC7A5;SNX25;SAT2;HNMT;LAPTM4A;MAP3K6;FBXO17;SLC9A6;SLC9A8;NPTXR;ITGB8;ACP2;TNFRSF1A;PPP1R15B;LRP1;GANAB;NCLN;PCDH1;PCDH7;CTNS;ZDHHC5;ZDHHC6;EPHA4;PTPRM;SDF2;GBA;PERP;SCARB2;FAM3A;UBE4A;PSEN1;CACNA1G;MANSC1;LAMC1;TIMM17A;PEX3;CLN6;CLN3;XYLT2;RNF121;SEH1L;ST3GAL6;WDR44;IFNGR1;SLC17A5;SLC17A7;RPL18;G0S2;WDR12;RNF149;RPS9;FKBPL;DI…
KLF5-18264089	9	102	0.00518732	0.00242493	0.00276239	0.0324302	3.11402	-10.6769	CD83;PDGFRA;RPN1;SERPINA3N;BMP7;BMP4;NRP2;SLC2A3;TCEA2
ESR2-21235772	42	424	0.0242075	0.0100801	0.0141274	8.19519e-07	0.765396	-10.7267	WSB1;BCAM;SLC19A1;BACE1;SLC7A5;WNT7B;ANKRD13D;PLOD2;SLC9A2;ABHD2;WFS1;B3GALT4;SLC37A3;SEMA3E;SLITRK4;LRRC8D;ENTPD3;PTGES;VASN;ACER3;QSOX1;GFRA1;CD55;PNPLA7;CELSR2;DSCAM;ATP1B1;NPNT;SIDT2;BMP7;EFNA1;KLHDC9;SLC2A1;LAMC1;ABCC5;CDH10;OPRL1;ATP2C2;LRIG1;CD9;CHPT1;GLA
VDR-20736230	30	230	0.0172911	0.00546799	0.0118231	1.87914e-07	0.700357	-10.8466	IFITM1;TXNDC11;LACTB;C1GALT1C1;ACSL4;ACSL3;DDIT4;SQLE;CD200;LGMN;ITM2C;CTSZ;CTSS;KIN;CD47;CXCR4;LDLR;SULF2;SCARB2;FBXW7;INSIG1;PSAP;PRNP;CRTAP;NFKBIA;PLXNB2;DHCR7;ECE1;LTC4S;GLB1
NANOG-16153702	105	1686	0.0605187	0.0400827	0.020436	4.53148e-05	1.10764	-11.0785	CXADR;CACNA2D1;EIF2AK3;FXYD5;SLC7A5;TXNDC5;KCNJ4;PCDH8;ALG9;KCNN2;CALR;EEF1E1;PNMA1;CACNA1A;UBE2S;PHTF2;TNFAIP6;TTC13;GLA;ICMT;ADAMTSL1;SLC39A9;FKBP7;FANCL;LRFN3;LRFN5;P4HA1;SLC26A8;PPIL3;SYNPR;STXBP2;AMIGO2;SUSD1;TMEM38A;BAMBI;FGFR1;LRRTM3;THBS2;UXS1;TDO2;ABCA5;LETM2;TMEM43;PSMA1;PTGS2;FSTL5;EXTL2;CEPT1;SAT2;CTGF;SLC9A2;B3GALT4;IL1RAPL1;LRP3;SLITRK5;EPHB3;EPHA4;EPHA7;SFRP2;APH1A;DYM;PTPRJ;DIRC2;…
ZFP42-18358816	119	1480	0.0685879	0.0351853	0.0334026	3.98829e-11	0.470111	-11.2568	SLC5A6;SAR1B;PIGT;MESDC2;EVC2;TMEM62;TMCO1;CENPP;PLOD1;APOA1BP;2510039O18RIK;NPTX2;B3GALT4;TMEM17;TBXAS1;PTER;NPC2;PPP1R15B;NDUFB8;ATP9A;DONSON;P4HB;FBXO6;PTGFRN;EPHA4;ALG8;ALG9;SURF1;LRRN2;PTPRS;GRIK5;MRPS11;HYAL2;SDF4;SDF2;GAA;TMPRSS7;PERP;CREG2;NPM1;PCDHB14;PCDHB13;DOHH;PCDHB12;PCDHB17;CD68;DPAGT1;BCCIP;KIRREL3;SLC30A3;PPIH;B330016D10RIK;CLK4;RPGR;ATP2C1;KDELC1;FAHD1;TAF12;GLB1;RPL5;WSB1;DKK3;…
YY1-21170310	37	464	0.0213256	0.0110311	0.0102946	0.000247396	1.37897	-11.4517	NGDN;TYRO3;EXD2;RPN1;PRPF38B;MRPL21;TM9SF4;RPL18;SLC39A9;NFE2L1;ACP2;GAL3ST3;NLGN1;NDUFB8;AU040320;NDUFA8;SEMA4A;CCDC58;TXNDC15;MFSD11;TMEM87B;ATP6V0A1;MRPS11;CRTAC1;SDF4;TMED9;EEF1E1;CRELD2;SFI1;GBA;NPM1;DOHH;DPAGT1;RPP30;CAPRIN2;TMEM101;ATP13A1
KDM6A-18722178	42	479	0.0242075	0.0113877	0.0128198	1.32874e-05	1.02234	-11.4796	SLC5A6;TMEM126A;LETMD1;PRPF38B;PPT1;SERPINI1;SRPR;MRPL32;TM9SF4;CLPTM1;TM9SF2;SLC39A9;GLT8D1;POLR2J;SEC11A;POLR2K;RNF26;MCOLN1;SLC35B1;ZDHHC6;SLC35A5;SLC12A9;ALG8;IFRD1;ALG2;MRPS18C;BTD;MRPS11;VLDLR;SDF2;ATP6V0B;USMG5;OS9;YIPF4;HSPA5;SRPRB;CKS1B;PEX3;QPCTL;GALNS;ERCC5;GLA
ERG-21242973	34	321	0.0195965	0.00763141	0.0119651	2.35004e-06	0.887881	-11.5079	OGFOD2;SLC12A9;MFSD11;KCNQ5;CADM3;UBAC2;SDF4;ELOVL2;TMEM179;FRG1;CHST2;KCNA1;ORMDL3;SUSD4;CSMD1;PCDHB13;PCDHB10;SNX14;CELSR2;NPNT;CDH24;WNT2;BMP3;LRFN5;MFSD3;EDIL3;ACP1;ATP6AP1;VSTM2L;ST6GALNAC5;POLR2J;KCNJ4;NTRK2;MERTK
MYC-18555785	101	1200	0.0582133	0.0285286	0.0296846	1.28161e-10	0.505619	-11.5169	TMEM97;SPINT2;TSKU;XYLB;MRPL13;PRPF38B;EIF2AK3;MRPL23;TBL2;HEXA;MESDC2;SLC7A1;EXTL2;EVC2;CSE1L;LAPTM4A;NOMO1;CASD1;MINPP1;SLC9A8;RNASEH2B;GPR89;AP4S1;CALR3;POMT1;TNFRSF21;E2F1;NDUFA4;NAGK;ALG8;ALG5;ALG2;TMEM87B;UBE2J2;SYNGR2;CALR;HYAL2;TLCD1;EEF1E1;NPM1;GNPTAB;SLC30A5;PPIB;EBP;DOLK;DEGS1;TIMM17A;NDUFS4;SLC3A2;NT5C3;MBTPS1;FAHD1;ACVR2B;MBTPS2;RPL5;GCSH;SEH1L;RPN1;CHST12;SLC19A2;1700021F05RIK;ELMOD…
HOXD13-18407260	19	196	0.010951	0.00465968	0.00629133	0.000990867	1.68654	-11.6657	EPHA7;MGST3;EDEM1;SSPN;LGMN;GABRB3;COL18A1;TRIM7;PRSS12;SORCS2;MPZL1;EVC2;IGF1R;ABHD2;BMP4;ITGB8;CDH12;NLGN1;NELL2
STAT1-20625510	48	656	0.0276657	0.0155957	0.0120701	0.000219449	1.41304	-11.904	STARD3;HEMK1;ENDOG;PIH1D1;EDEM2;KCNC4;TCTN1;GPR37;TMEM179;SLC17A7;LGR6;GRB14;SLC15A2;NPTXR;SERINC3;COX4I1;ITGB8;NPC2;ITGA7;SEMA3F;FYB;LRRC8C;AMFR;NTRK3;SYT16;FAAH;IFITM2;OGFOD2;APH1A;NTSR1;DDR1;CTSZ;PTPRJ;PCSK5;SPTLC1;DNER;MANBA;MATN2;PDGFRB;CGRRF1;CHRNA5;PSEN2;CAV2;MAN2B1;RCN3;TMEM216;CDIPT;CD9
HIF1A-21447827	31	321	0.0178674	0.00763141	0.010236	3.33451e-05	1.15847	-11.9422	TMEM88;WSB1;NUP210;DDIT4;RDH11;WDR54;DHRS13;PTPRN;PTPRM;VKORC1;SUMF1;MGAT5;RIT1;BCCIP;PLOD2;FBXW7;SLC9A9;BMP4;P4HA1;DHCR7;SLC2A1;SLC2A3;SLC37A3;AGPAT5;LRP1;TM2D3;CLN5;ATP9A;MBTPS1;SEMA4B;HTR5A
LYL1-20887958	72	752	0.0414986	0.0178779	0.0236206	4.43825e-10	0.556369	-11.9817	TMEM88;GPR161;VOPP1;ENDOD1;ABCB9;CYB5R1;FUCA1;KCNC1;IFNGR2;PRSS12;PIGC;PSMA1;ADAM23;RABAC1;RNF130;ANKRD13D;NAGLU;IFNAR2;TAP2;TPST2;SLC9A2;LRRC4B;GPR108;SLC26A8;TREM2;SGCB;RFC2;BPGM;SEC22C;LRRC8C;UGGT1;SEMA4F;ST7;SLC35B4;NIPAL3;EPHB2;ZFP1;EIF1B;IGSF8;NEU1;FBXL2;ITM2C;GRIK1;CTSF;CD34;IL17RA;TMPRSS7;ORMDL3;CREG2;DOHH;PDCL3;SPCS3;RAMP1;SCARB2;FAM198A;ENPP5;PDGFRB;ABCG4;SLC41A3;PRNP;DYRK3;EGFL7;ABCC1;…
POU5F1-18358816	57	753	0.032853	0.0179017	0.0149513	2.50765e-05	1.13675	-12.0422	RPL5;HEMK1;LRPAP1;FN1;IL1F9;LFNG;LMBR1;SLC39A14;TMEM106B;TMEM70;SLC7A3;EVC2;SULF2;TMCO1;CENPP;KCNH3;SEMA6C;SYPL2;SLC9A2;IL6ST;ZFP57;NSG2;BPGM;RTN4RL1;PPP1R15B;PPIL3;IFITM1;IFITM2;PTGFRN;SIL1;SLC12A7;ARSA;ALG8;SFRP2;2410015M20RIK;LRRN2;TMEM50A;PTPRU;GRIK4;UCHL3;SLC20A1;DERL2;PDPN;GPC3;VEGFC;SIRPA;OSTF1;TMEM131;TMEM129;RHBDD2;NFKBIA;DYRK3;LRRTM3;LMBRD2;PEX3;THBS2;SLIT2
E2F1-17053090	137	1726	0.0789625	0.0410337	0.0379288	2.88214e-12	0.459703	-12.2154	POP4;JAG1;L1CAM;FXYD6;HYOU1;FXYD5;KCNC1;SLC7A8;CHST1;KCNA1;SLC7A1;RIC3;SNX19;LGR4;BLM;ACP2;HTR3A;TNFRSF1A;E2F1;KCNJ4;NTRK3;PCDH8;SYT16;NAGA;SYT13;SLC23A2;ALG9;EXT2;HERPUD1;TLCD1;PCNX;IGF1R;GNPTAB;PPIB;NDUFB11;CACNA1C;CACNA1G;DHRS7B;UBE2S;CNTN1;MANSC1;SLC3A2;AGPAT3;SV2B;GALNS;CD9;ERCC5;GNS;GJB6;WDR44;HIPK4;GABRA3;TM7SF3;M6PR;LRFN5;CCDC34;TRPC4;DNAJC3;SLC35A2;SLC35C2;COL18A1;SLC22A17;ZDHHC13;MAGEH1…
ELK1-19687146	67	917	0.0386167	0.0218006	0.0168161	1.4667e-05	1.11468	-12.4062	ALKBH6;TMEM126A;HEXA;NIPA2;PIGC;ERGIC2;PTGS2;TMEM70;CLPTM1;ATAD1;TMCO1;SNX14;CTGF;G6PC3;TMEM19;MCFD2;PTER;ITGB8;MET;NDUFA4;NAGK;SYT11;SEC63;EPHA5;TMEM87B;PCDH10;OS9;PLAU;SLC30A7;ADAM10;UBE4A;ADAM17;HMGCR;TAF12;CD9;ERCC5;NCSTN;WDR44;SSR3;SF3B5;TM9SF3;RNF130;SYVN1;TUSC3;SLC39A9;ANKRD42;ADAM9;FANCL;M6PR;P4HA1;DNAJC3;POLR2K;PTPN12;ZNHIT1;TOMM40;AMIGO2;CBR4;TOMM20;CHRNA5;CKS1B;HS2ST1;RBM3;TM2D1;PRRG2;…
EWS-FLI1-20517297	52	574	0.0299712	0.0136462	0.016325	5.43515e-07	0.865888	-12.4906	GJA4;STARD3;MED4;EXD2;MRPL13;NCSTN;FLRT2;CP;MRPL21;PNOC;LETM2;TCTN1;RSPO2;GRAMD4;CYP20A1;CHRM3;ABHD13;RPS9;SLC9A8;ABHD2;LRFN2;CCDC47;ASPH;LRP1;POLR2K;OCIAD1;MDGA2;EPHB1;ALG9;PTDSS1;GPAA1;TMEM150C;ZDHHC17;MLF1;MATN2;COL19A1;YIPF1;PLAT;SIRPA;DSCAM;TCTEX1D2;TMEM117;DNAJC10;MAN2B1;ABCD4;TSEN15;LMBRD2;AGPAT5;AGPAT3;PDSS1;CCK;HCN1
MYC-18940864	57	746	0.032853	0.0177353	0.0151177	1.96506e-05	1.16187	-12.5917	POP4;CHID1;ASPHD2;ASTN2;JAG2;B3GALT2;NIPA1;NIPA2;SF3B5;TMEM68;LDLR;ATAD1;TMCO1;PCYOX1L;CHRM3;TSEN2;CDH2;MAP3K6;NUDT14;FBXW7;RPS5;APOA1BP;ITGAV;ACP1;TMBIM6;PCDH9;ARL6IP1;ALG9;TMEM161B;PCDH10;TSPAN7;TMEM86A;TMEM50A;BRI3BP;EXT2;VLDLR;ROBO1;AGTRAP;CYP7B1;CD44;CXCR4;PERP;PNPLA7;MTX2;CIB2;CHCHD7;TMEM14C;CAPRIN2;CDH13;CHMP6;STOML2;ATP1A1;SCN7A;LGI2;ACVR2B;SLC4A7;AQP11
WT1-19549856	21	199	0.0121037	0.004731	0.00737275	0.0001964	1.49006	-12.7182	ARL6IP6;IFRD1;CD99L2;TRPM4;COL1A1;ROBO2;NRP1;CTSB;GFRA2;TMEFF2;CXCR4;CBR4;GABRA2;TMCO3;TMEM59;DNAJC16;EFNA1;SLC2A3;SLC3A2;ATP2C1;ATP2B4
E2F1-21310950	80	1145	0.0461095	0.0272211	0.0188884	1.03359e-05	1.11362	-12.7843	TMEM97;ZFYVE27;XYLB;FIBCD1;SLC5A6;MRPL13;EDEM3;KCNC3;SRPR;PSMA1;TMEM62;CASD1;TXNDC5;SLC25A14;SEC22C;SLC12A4;NTRK3;DONSON;ST7;P4HB;BSG;ALG8;TMEM87B;TMEM63B;SCN3B;ZBED5;NRP2;GPAA1;KIT;CD47;EEF1E1;GBA;KCNS3;RPP30;CYP46A1;NPNT;SCN8A;SEL1L;DHRS7B;SDK1;STT3B;PODXL2;ZMYND19;LMBRD2;RRBP1;SLC3A2;ATP2B1;ATG10;TYRO3;SEH1L;FLRT2;ASAH1;FAM105A;SYVN1;NFIB;SLCO4C1;AUP1;FKBPL;STIM2;ERH;IFNAR1;GLT8D1;ADRA1D;SLC35…
NANOG-18358816	101	1232	0.0582133	0.0292894	0.0289239	4.8029e-10	0.609465	-13.0771	CACNA2D1;ASPHD2;THY1;EIF2AK3;FN1;GPR19;SLC39A14;SEZ6;SLC7A3;SPP1;TMEM57;CTGF;KCNH7;SLC9A2;IL6ST;PORCN;NPTX2;TXNDC5;HPS1;PPP1R15B;SLC12A4;TSPAN14;PTGFRN;ARSA;PAQR7;LRRN2;AGTRAP;COMMD3;KIT;TLCD1;CRELD2;GABBR1;VEGFC;PLAT;CACNA1C;SYT3;BMP4;STT3B;DYRK3;TNFAIP6;LAMC1;TAPBP;CREB3;LMBRD2;HMGCR;GALNT1;MBTPS2;LRPAP1;FLRT3;CHST10;EMB;IFNGR2;SLCO4A1;TM9SF3;SULF2;NFIB;CYB561;DGKE;ATP8A1;PARK7;ABCA8B;IGFBP2;SY…
ETS2-20176728	24	215	0.0138329	0.00511138	0.00872147	3.18083e-05	1.2771	-13.2254	EPHB1;SLC12A7;ARSA;UNC5A;POR;WBSCR17;FUT10;ABCB8;EXT2;HYAL2;MMP17;GSTP2;EXTL1;MGAT5;TM9SF2;DHRS7;GHDC;MINPP1;LSM8;DNAJC10;CNTNAP2;ITGA3;NCAM1;KCNJ4
TCF3-18692474	105	1351	0.0605187	0.0321185	0.0284002	3.1707e-09	0.676338	-13.2355	CLDN5;DDIT4;LETMD1;JAG1;FN1;TMEM51;SLC39A14;MMP15;SLC7A3;ADAM23;SPP1;CEPT1;TMEM59;TMEM57;LGR4;CTGF;SLC9A2;SLC9A8;SLC9A9;IL6ST;PORCN;DGCR2;E2F1;KCNJ9;PCDH8;SLC23A2;D130043K22RIK;SCN1A;ACVR1;ZFP1;LRRN2;EXT1;PTK7;HYAL2;CTSF;COMMD3;KIT;POPDC3;VEGFC;TCAP;DPAGT1;OSTF1;KIRREL2;SIDT1;NXPH3;DYRK3;LMBRD2;RALB;SLC3A2;HMGCR;AGPAT3;CLN5;MBTPS2;MRGPRE;TYRO3;ASTN1;LRPAP1;PRDX4;FLRT3;SLC6A7;EMB;SSR2;HBEGF;TM9SF4…
KDM5B-21448134	296	3724	0.170605	0.0885339	0.0820713	3.73578e-26	0.242573	-14.2025	NUP107;CACNA2D3;PRPF38B;EIF2AK3;ADAM22;ADAM23;ATAD1;LGR4;FBXW7;ATP11B;FBXW2;BLM;NEO1;OCIAD1;SLC23A2;BTD;SYNGR1;KCNN2;SLC10A7;FBXL2;GRIK2;HERPUD1;SDF4;SDF2;FITM2;NDUFAB1;PLAT;PLAU;FAM3C;DNAJB11;SDK1;SDK2;SUN1;RALB;TTC13;CD9;ERCC5;BCAM;NDFIP1;WDR12;OSTM1;PARK7;GLT8D1;CPE;DNAJC1;COCH;NFU1;IFRD1;SLC22A5;TMED2;ZDHHC13;ZDHHC16;PDPN;AIG1;SPCS2;QPCT;FGFR1;SVOP;TMEM2;CDH13;NRXN1;ATP1A1;PDSS1;ATP13A1;ATP13…
ETS1-20019798	137	1607	0.0789625	0.0382046	0.0407579	2.25177e-14	0.491677	-15.4507	NUP107;POP4;HEMK1;RDH11;RDH14;MAGOHB;CENPP;DGAT1;FBXW7;CNPY2;HSP90B1;CLPTM1L;ACP2;TMBIM6;LRTM2;SYT13;ALG2;EIF1B;MRPS11;SDF4;GBA;ORMDL3;NDUFAB1;TCEA2;SYS1;RPP30;DNAJB12;UBE4A;PLD3;DHRS7B;SYT5;SYT3;TMEM222;RER1;TMEM214;TMEM208;ERCC5;NCSTN;CDC123;CLDND1;SLC17A7;WDR12;AUP1;M6PR;LRFN3;CCDC47;EMILIN1;POLR2K;SEC11C;SLC35A1;PPIL3;VEZT;SLC35B4;SLC35B1;SLC35A5;IFRD1;CPT1C;TMED5;TMED9;CBR4;STOML2;STOML1;NRX…
ELF1-20517297	78	1020	0.0449568	0.0242493	0.0207074	6.10788e-07	1.1006	-15.748	ORAI3;PIGU;PIGO;KCNC4;PANX1;GSTO1;PIGG;SLC7A1;P4HTM;SAT2;FADS3;KCNH5;HPS1;ACP1;TNFRSF1A;LRP3;LRRC8A;SLC12A4;MBOAT7;SYT12;ZDHHC6;PAQR7;KCNN1;GRIK5;CTSS;SDF4;CD34;CTSB;AGTRAP;GBA;TCAP;SLC30A3;SCN8A;SLC1A4;STT3A;PRR7;LAMC1;PHTF1;CPXM1;SYNGR3;TMEM218;TAF12;CCS;CD9;NUP210;GPR162;SEH1L;FLRT1;GNPTG;C1QTNF4;TCTN1;RPL11;LPCAT4;COL16A1;NAGLU;SLCO2B1;SYPL2;GPR108;RAD9B;SCPEP1;VSTM2L;HAUS7;SLC35B4;JMJD8;VDAC…
ERG-20517297	79	1062	0.0455331	0.0252478	0.0202853	1.39032e-06	1.17381	-15.83	TMEM97;TDO2;WLS;HEMK1;VOPP1;LETMD1;EDEM3;EDEM2;MAGOHB;PIGU;PIGT;ADAM22;SLC7A1;TMEM70;NPTX1;TMEM17;CALR3;ITGB8;SEC22C;NDUFB8;FYB;LINGO1;NDUFA8;TM6SF1;SYT12;ST7;SCN1A;ENTPD3;OMG;BTD;SYNGR2;ARSK;DYM;DHRS13;MRPS11;CTSF;TLCD1;TMEM176B;PCDHB17;PLAT;IGF1R;CACNA1C;CAV2;AGPAT3;GLB1;CHGB;CHST10;ICMT;ELMOD2;HSPA13;ERMP1;RPS3;IL10RB;G0S2;NFIB;ABHD13;ERP29;ANKRD42;ABHD2;INSIG1;CPD;GAL3ST3;TRPC4;APP;SLC35B4;SL…
NOTCH1-17114293	16	134	0.0092219	0.0031857	0.0060362	0.000318234	2.02184	-16.2813	THYN1;IFRD1;SEL1L;TMEM115;CPE;LGMN;MRPS11;CYB561D2;ABCC5;PSMA1;CLDND1;DERL1;SLC3A2;HSPA13;SEC11C;SPCS2
EWS-ERG-20517297	72	1038	0.0414986	0.0246773	0.0168213	3.49585e-05	1.58707	-16.2855	UXS1;CACNA2D1;B3GALT2;GSTO1;EXTL2;DCBLD2;LGR6;KCNH5;KCNH7;SLC9A9;HSP90B1;GRIA4;PCDH1;CNNM2;LINGO1;SLC12A5;HTR5A;SYT12;TMEM87B;EPHA10;TMEM63C;PCSK2;GPAA1;PTPRN;HYAL2;TMEM150C;OS9;KIRREL3;SLC30A7;KCNV1;CNTN1;MANSC1;LAMC1;PHTF1;CPXM1;SUN1;SSTR2;LMBRD2;RRBP1;AGPAT3;ACVR2B;FICD;SQLE;PNOC;FANK1;TCTN1;RSPO2;HBEGF;SYVN1;CHRM3;TRPC4;VSTM2L;ASPH;SEMA4A;VIPR1;PTDSS1;UBAC2;VLDLR;SPPL3;CYP7B1;MLF1;FRG1;FIBIN;…
CHD7-19251738	21	141	0.0121037	0.00335211	0.00875163	1.93556e-06	1.24782	-16.4152	CHPF;CTGF;CDH2;FAM3A;SEC63;IFNAR2;RPS9;IFNAR1;SLC22A5;CAV2;MRPL23;BMP4;EXT1;IFNGR2;MET;NRXN1;FLNA;TRAM1L1;IL10RB;DONSON;ST7
CDKN2AIP-20523734	24	123	0.0138329	0.00292419	0.0109087	4.02714e-09	0.907525	-17.5427	SPON1;DSCAM;LY6H;EPHA3;B4GALNT4;SYT1;GPR108;PTPRE;CALY;NSG2;PTPRS;GRIK4;TIMP2;ACP1;CHST8;SFI1;ATP6V0E;PPP1R15B;ATP1A3;NCLN;SPOCK1;NCAM2;NPM1;MDGA2
SPI1-20517297	92	1249	0.0530259	0.0296936	0.0233324	2.85709e-07	1.19573	-18.0177	TMEM88;HEMK1;RHBDL1;NR2F6;PIGO;MESDC2;GSTO1;TMEM106B;ATL1;ANO10;ATAD1;TMEM57;NPTXR;TXNDC5;CNTNAP1;TNFRSF1A;NELL2;SYT12;SST;SYT11;MGP;KDELR1;TXNDC11;FBXO6;FBXO8;ENTPD3;SYNGR1;KCNN1;ZBED5;TECR;PTPRJ;IER3IP1;VKORC1;CANX;DOHH;SCARB2;NPPC;LMTK3;ADAM15;CACNA1I;DHRS7B;CLK4;PRR7;LAMC1;SLIT3;HS3ST1;CD9;CREB3L1;PIH1D1;GPR162;NDFIP2;FANK1;IL1F9;ABCC10;TCTN1;IFNGR1;RPL11;HSPA13;SLC17A7;G0S2;LPCAT2;TM7SF2;IFN…
SMAD3-18955504	148	1936	0.0853026	0.0460262	0.0392764	4.99295e-12	0.732456	-19.0607	TSKU;DDIT4;RDH11;TBL2;SFXN4;SMPD1;SLC7A5;SLC7A8;SLC7A1;PLOD2;NUDT18;KCNH2;FST;MCFD2;ITGB8;ITGAV;ITGA3;TNFRSF1A;FYB;PCDH1;ST7;PTGFRN;ALG2;EIF1B;EXT1;EXT2;TLCD1;GBA;PNMA1;ORMDL3;XDH;TMEM176B;IGF1R;PLAU;SDK1;MAN1B1;SLC3A2;TRDMT1;ST3GAL5;NDFIP2;NDFIP1;FANK1;GAS6;PLP2;CLU;SLC39A9;PLXNA2;LRFN4;THBD;RFC2;DNAJC3;DENND3;POLR2J;IFRD1;CASZ1;COL18A1;SLC35F2;SUSD1;SPCS2;EFNA1;TMEM2;CDH13;TYW1;ABCB8;ABCA5;MESD…
SMAD2-18955504	148	1936	0.0853026	0.0460262	0.0392764	4.99295e-12	0.732456	-19.0607	TSKU;DDIT4;RDH11;TBL2;SFXN4;SMPD1;SLC7A5;SLC7A8;SLC7A1;PLOD2;NUDT18;KCNH2;FST;MCFD2;ITGB8;ITGAV;ITGA3;TNFRSF1A;FYB;PCDH1;ST7;PTGFRN;ALG2;EIF1B;EXT1;EXT2;TLCD1;GBA;PNMA1;ORMDL3;XDH;TMEM176B;IGF1R;PLAU;SDK1;MAN1B1;SLC3A2;TRDMT1;ST3GAL5;NDFIP2;NDFIP1;FANK1;GAS6;PLP2;CLU;SLC39A9;PLXNA2;LRFN4;THBD;RFC2;DNAJC3;DENND3;POLR2J;IFRD1;CASZ1;COL18A1;SLC35F2;SUSD1;SPCS2;EFNA1;TMEM2;CDH13;TYW1;ABCB8;ABCA5;MESD…
TFAP2A-17053090	146	1904	0.0841499	0.0452654	0.0388844	5.71387e-12	0.75048	-19.4285	FXYD6;HYOU1;PANX1;SNX19;DGAT2;KCNH5;GRIA4;ITGA3;HTR3A;ADAMTS20;TNFRSF1A;ATRN;ADORA2B;ITGA7;NTRK3;PCDH8;SYT16;ALG9;TMEM63C;SYNGR1;KCNN1;GRIK5;WFDC1;MC4R;SYP;TLCD1;PCNX;GNPTAB;SIDT2;CACNA1C;DHRS7B;SYT1;UBE2S;SDK2;SLC3A2;SV2B;GALNS;GLA;SEH1L;GNS;WDR44;GAS6;GRN;GRP;GABRA5;IL10RB;DHRS7;SLC39A6;PLXNC1;SLC39A3;RTN4R;OSBPL2;CCDC34;DNAJC3;SLC13A5;SLC35A2;SLC35C2;SLC35E3;COL18A1;TMED3;TMED2;TMED1;AMIGO2;FB…
AR-20517297	158	2047	0.0910663	0.0486651	0.0424012	4.40348e-13	0.808654	-23.0072	NUP107;ISLR;WLS;RDH11;MAGOHB;SMPD1;TSPO;ATL1;KCNA2;SNX14;LGR6;CNPY2;HTR1A;TBXAS1;MCFD2;BOC;NRG2;ITGA6;NTRK3;HTR5A;HCRTR1;TSPAN14;SYT12;FBXO6;ALG2;BTD;KCNN2;SLC10A7;EXT2;MRAP2;NRP1;NRP2;MRPS11;HERPUD1;SDF2;AGTRAP;CACNA1C;ODF2L;CAV2;AGPAT3;TMEM205;TRDMT1;HS3ST1;PPT1;ELMOD2;ERMP1;NFIB;TM7SF3;CLU;TM7SF2;PLXNC1;IFNAR1;GLT8D2;TMEM132C;THBD;GAL3ST3;CHPF2;LCT;IL15RA;SLC35C2;CYP2U1;SLC22A5;TMED4;MATN2;AMN…
GLI1-17442700	11	73	0.00634006	0.00173549	0.00460457	0.00047679	3.02916	-23.1683	ROBO2;PIGT;CDH8;CAR10;SLC39A10;RGMA;ASTN2;GPC3;NCAM1;NTNG2;DCBLD1
ZNF263-19887448	11	71	0.00634006	0.00168794	0.00465211	0.000386252	2.99024	-23.5004	LMBR1;APLP2;SLC7A5;ASPH;PPIH;SLC3A2;PCNX;METTL5;WDR54;SQLE;CYB561
TP63-17297297	6	40	0.00345821	0.000950955	0.00250726	0.00925044	5.15179	-24.1263	PERP;JAG1;ITGA3;BMP7;DDIT4;ITGA6

## Sheet: SuppData3 E2K turquoise.res (2)
Kinase	Substrates in Input	Substrates in Database	Input Fraction	Database Fraction	Difference	P-value	Z-score	Combined Score	Substrates
TRIM28	16	21	0.0833333	0.00463269	0.0787006	1.80854e-13	-1.94204	56.9816	CEBPB;CBX5;SETDB1;CBX3;CBX1;CHD3;NR3C1;ESR1;YWHAZ;CHAF1A;TRIM28;SERTAD2;ZNF689;IKBKG;VIM;ZNF354A
HIPK2	17	43	0.0885417	0.00948599	0.0790557	9.25526e-11	-1.8469	42.6694	CTBP2;SUMO1;MYB;EP300;NKX2-5;BTRC;TP63;CREBBP;UBE2I;CBX4;PAX6;RUNX1;SKI;CREB1;MDM2;TP53;TP73
ABL1	25	151	0.130208	0.0333113	0.0968971	2.5447e-08	-2.10033	36.7278	EP300;TP63;TP53;ABL1;JUN;ESR1;MDM2;TP73;CASP9;YWHAQ;EMD;YWHAG;NCOA3;YWHAZ;VAV1;DDB1;CREB1;TRAF6;MYOD1;YAP1;CEBPB;ERBB3;ERBB4;RYBP;CTNNB1
MAPK14	45	461	0.234375	0.101699	0.132676	1.773e-07	-2.2678	35.254	MYC;MYB;AKT1;MED1;CSNK2A1;CSNK2A2;AR;EWSR1;JUN;NFATC1;EZH2;SIRT1;NCOR1;STAT1;STAT3;MAX;SIN3A;ATRX;TRAF6;GTF3C1;E2F1;RUNX1;CSNK2B;TP53;HIST1H3A;SMARCA5;POLA2;MLL;NCOA3;NR5A1;RELA;NR3C1;KDM2B;MATR3;SMAD3;ESR1;SMAD7;KDM5A;CHD3;CASP9;CASP3;RBL2;CREB1;MTA1;TAF6
MAPK1	36	312	0.1875	0.0688286	0.118671	9.56805e-08	-2.1338	34.487	MYC;MYB;MED1;CSNK2A1;RUNX1;AR;EWSR1;TP53;GATA4;HIST1H3A;JUN;CREBBP;C1QBP;PARP1;NCOA3;SREBF2;VAV1;NR5A1;RELA;PAK2;STAT1;STAT3;NR3C1;EP300;GTF2I;SMAD3;ESR1;NR4A1;SP1;ARRB2;CASP9;RBL2;HDAC4;CEBPB;E2F1;TAF6
MAPK8	30	275	0.15625	0.0606662	0.0955838	3.84132e-06	-2.06032	25.6915	MYC;SMARCC2;AR;EWSR1;TP53;JUN;NFATC2;NFATC1;PHC3;TP73;IKBKG;NCOA3;SIRT1;TOPORS;CDKN2A;STAT1;STAT3;ITCH;CTNNB1;NR3C1;ABL1;SMAD3;ESR1;NR4A1;SP1;KDM5C;YWHAZ;TRAF6;CEBPB;REST
CSNK2A1	44	521	0.229167	0.114935	0.114232	9.92505e-06	-1.99614	22.9964	MYC;MYB;AKT1;CSNK2A1;NKX2-5;CREBBP;JUN;NFATC1;SNAI1;PAX3;SIRT1;PSMA3;PPP1R8;STAT1;USP7;MAX;SP1;MDM2;PIN4;ARRB2;ATRX;GTF3C1;HDAC2;HDAC1;FTH1;CSNK2B;TP53;CFTR;EGR1;SETDB1;SMARCA4;RELA;SUZ12;ITCH;CTNNB1;KDM1A;NR3C1;CBX5;CBX1;ESR1;CASP9;YWHAQ;CREB1;VHL
ATM	22	177	0.114583	0.039047	0.0755363	1.38128e-05	-1.98393	22.2	NR3C1;TRIM28;AKT1;EP300;TP63;MED1;SMARCC2;EWSR1;MATR3;TP53;CFTR;ABL1;JUN;XRCC5;SP1;MDM2;C1QBP;IKBKG;CREB1;E2F1;CTNNB1;VIM
AKT1	27	256	0.140625	0.0564747	0.0841503	2.18268e-05	-2.02473	21.7302	PHB2;SOX2;AKT1;SMARCC2;CSNK2A1;AR;CREBBP;NFATC2;EZH2;YAP1;HTT;STAT1;SKI;CTNNB1;EP300;DNMT1;SMAD3;ESR1;SMAD7;NR4A1;MDM2;CASP9;CASP3;YWHAZ;CREB1;GTF3C1;VIM
MAPK3	27	251	0.140625	0.0553717	0.0852533	1.57468e-05	-1.92884	21.3308	MYC;MYB;AKT1;MED1;RUNX2;RUNX1;AR;EWSR1;TP53;GATA4;JUN;NFATC1;C1QBP;SREBF2;NR5A1;PAK2;STAT1;STAT3;NR3C1;GTF2I;ESR1;SP1;KDM5A;CASP9;HDAC4;CEBPB;ATP1A1
PRKACA	35	395	0.182292	0.0871388	0.0951529	3.90972e-05	-1.72697	17.5278	ABCB1;GATA4;NFE2;CREBBP;H3F3A;NFATC1;SNAI1;EMD;TEAD1;HTT;PPP1R8;WT1;SLC9A3R2;SLC9A3R1;HDAC5;CEBPB;APC;TP53;CFTR;MAP1LC3A;NCOA3;YAP1;RELA;ITCH;CTNNB1;NR3C1;EP300;CBX3;ESR1;CASP9;HIST1H1A;YWHAZ;CREB1;ATP1A1;VIM
PRKDC	24	227	0.125	0.0500772	0.0749228	6.30357e-05	-1.57045	15.1891	HNRNPU;AKT1;PRKAB1;TP53;CFTR;AIRE;JUN;PHC2;XRCC5;IKBKG;PARP1;RELA;NR3C1;MATR3;ABL1;POU2F1;SP1;MDM2;CASP3;YWHAG;YWHAZ;GTF3C1;E2F1;VIM
TAF1	10	42	0.0520833	0.00926539	0.0428179	3.4601e-05	-1.43331	14.7224	GTF2B;RELA;JUN;TBP;RBL2;CREB1;EWSR1;MDM2;TAF6;TP53
GSK3B	44	600	0.229167	0.132363	0.096804	0.000246718	-1.59316	13.2348	MYC;MYB;CSNK2A1;PRKAB1;AR;JUN;NFATC2;PHC3;SNAI1;IKBKG;PAX3;SIRT1;NCOR1;STAT1;STAT3;DNMT1;ABL1;MDM2;SIN3A;GTF3C1;HDAC4;CEBPB;E2F1;MGA;APC;SMARCC2;RUNX1;TP53;MLL;NCOA3;NR5A1;RELA;CTNNB1;NR3C1;KDM2B;ESR1;KDM5A;CHD3;CASP9;RBL2;CREB1;VHL;REST;TAF6
PRKCZ	14	104	0.0729167	0.0229429	0.0499738	0.000261591	-1.41029	11.6331	AKT1;CSNK2B;CREBBP;NFATC2;SP1;CASP9;C1QBP;CASP3;NCOA3;TRAF6;RELA;VHL;STAT3;CDK5R1
PIM1	8	27	0.0416667	0.00595632	0.0357103	5.87605e-05	-1.18985	11.5915	RELA;HIST1H3A;MYC;CBX3;CBX1;NFATC1;RUNX3;MDM2
CDK2	43	606	0.223958	0.133686	0.090272	0.000579916	-1.53361	11.4295	MYC;MYB;MED1;CSNK2A1;CREBBP;JUN;NFATC2;EZH2;CHAF1A;NCOR1;STAT3;GTF2I;TFCP2;MDM2;SIN3A;ATRX;GTF3C1;CEBPB;E2F1;APC;TP63;RUNX1;TP53;SETDB1;SMARCA5;TP73;MLL;TOPORS;EP300;SMAD3;POU2F1;ESR1;KDM5A;KDM5C;CHD3;CASP9;HIST1H1A;RBL2;CCNA1;MYOD1;MTA1;REST;VIM
RPS6KA5	9	37	0.046875	0.00816236	0.0387126	7.47668e-05	-1.19938	11.3955	CEBPB;RELA;HIST1H3A;EP300;CREBBP;STAT1;STAT3;NR4A1;CREB1
RPS6KA3	29	365	0.151042	0.0805206	0.070521	0.00106395	-1.24723	8.53822	TRIM28;SMARCC2;PRKAB1;AR;TP53;CFTR;ABCB1;HIST1H3A;CREBBP;NFATC2;PPP1R8;PAK2;STAT3;WT1;MATR3;SLC9A3R1;SMAD3;ESR1;NR4A1;MDM2;CASP9;YWHAZ;RBL2;CREB1;GTF3C1;HDAC4;CEBPB;E2F1;VIM
CHUK	12	90	0.0625	0.0198544	0.0426456	0.000780036	-1.08251	7.7466	ARRB2;MYC;IKBKG;BTRC;IKBKE;NCOA3;NCOR1;TP53;RELA;CREBBP;ESR1;CTNNB1
CDK4	9	51	0.046875	0.0112508	0.0356242	0.00061298	-1.04476	7.72825	MYC;RUNX3;WDR77;RBL2;MYOD1;SERTAD1;SMAD3;SETDB1;CDKN2A
ATR	10	63	0.0520833	0.0138981	0.0381853	0.000645943	-0.953309	7.00186	MLL;SMARCC2;CREB1;EWSR1;TP53;E2F1;XRCC5;CDKN2A;SP1;MDM2
WEE1	7	18	0.0364583	0.00397088	0.0324875	4.2274e-05	-0.683627	6.88504	SMAD3;CSNK2A1;FBXW11;YWHAZ;CASP3;BTRC;YWHAG
PRKD1	9	54	0.046875	0.0119126	0.0349624	0.000883295	-0.851587	5.98824	YWHAQ;C1QBP;AKT1;CREB1;HDAC5;ABL1;JUN;SNAI1;CTNNB1
MAPKAPK2	8	40	0.0416667	0.00882418	0.0328425	0.000598333	-0.805831	5.98036	AKT1;PHC2;YWHAZ;ESR1;CREB1;MDM2;VIM;TP53
PRKCD	14	146	0.0729167	0.0322083	0.0407084	0.00513586	-0.598471	3.15484	TRIM28;EP300;RUNX2;TBL1XR1;TP53;HIST1H3A;CREBBP;TP73;C1QBP;YWHAG;YWHAZ;HDAC5;STAT1;STAT3
CDK7	7	31	0.0364583	0.00683874	0.0296196	0.00070828	-0.396054	2.87245	E2F1;PCGF6;POU2F1;ESR1;NR5A1;AR;TP53
CSNK2A2	21	267	0.109375	0.0589014	0.0504736	0.00600089	-0.498749	2.55152	MYC;MYB;CSNK2B;TP53;EGR1;CREBBP;JUN;XRCC5;PSMA3;RELA;PPP1R8;CTNNB1;MAX;CBX3;ESR1;SP1;PIN4;ARRB2;SIN3A;HDAC2;HDAC1
RAF1	10	84	0.0520833	0.0185308	0.0335526	0.00448559	-0.364954	1.97326	ARRB2;NR3C1;MYC;YWHAG;YWHAZ;VAV1;RBL2;AR;PHB;HSPA8
CDK9	7	38	0.0364583	0.00838297	0.0280754	0.00200217	-0.29012	1.80267	RELA;HIST1H1A;SMAD3;CDK9;AR;TP53;CDK5R1
CSNK1D	10	85	0.0520833	0.0187514	0.033332	0.00484033	-0.324643	1.7306	YWHAQ;AKT1;IKBKG;NCOA3;TP53;YAP1;DNMT1;APC;MDM2;CTNNB1
AURKB	7	43	0.0364583	0.00948599	0.0269723	0.00371319	-0.189019	1.05773	CENPA;HIST1H3A;NINL;H3F3A;PSMA3;VIM;TP53
GSK3A	7	44	0.0364583	0.0097066	0.0267517	0.00415923	-0.119965	0.657698	MYC;YWHAG;JUN;NFATC1;CREB1;CTNNB1;TP53
CAMK4	6	25	0.03125	0.00551511	0.0257349	0.00130944	-0.0136207	0.0904162	HDAC4;HDAC5;RELA;EP300;CREBBP;CREB1
MAPK10	12	121	0.0625	0.0266931	0.0358069	0.00736477	-0.0102335	0.0502573	NR3C1;MYC;TP53;JUN;NFATC2;NFATC1;ARRB2;MYOD1;GTF3C1;CEBPB;CDKN2A;BCOR
BCR	7	48	0.0364583	0.010589	0.0258693	0.00635945	0.127086	-0.642776	YWHAQ;YWHAG;YWHAZ;VAV1;TP53;CFTR;ABL1
PRKCG	1	61	0.00520833	0.0134569	-0.00824854	0.924911	11.2067	-0.874768	YWHAG
CSNK1E	13	148	0.0677083	0.0326495	0.0350589	0.0132102	0.234782	-1.01585	MYB;TP53;DNMT1;MAX;ESR1;SNAI1;YWHAQ;YWHAZ;HDAC2;HDAC1;PAK2;APC;CTNNB1
ADRBK1	1	56	0.00520833	0.0123538	-0.00714552	0.907356	11.962	-1.16296	MDM2
PAK2	7	48	0.0364583	0.010589	0.0258693	0.00635945	0.248282	-1.25576	CASP3;MYC;ABL1;PAK2;JUN;YES1;VIM
PLK1	10	92	0.0520833	0.0202956	0.0317877	0.0079824	0.274198	-1.32452	YY1;NINL;TOPORS;PSMA3;TP53;PSMB6;MDM2;CTNNB1;VIM;TP73
ZAP70	1	51	0.00520833	0.0112508	-0.00604249	0.885722	11.9916	-1.45521	VAV1
TRIM24	10	95	0.0520833	0.0209574	0.0311259	0.00973306	0.379033	-1.75577	NR3C1;TRIM28;SUMO1;TRIM24;AR;TP53BP2;CBX5;CBX3;CBX1;ESR1
MAP3K7	10	102	0.0520833	0.0225017	0.0295817	0.0149508	0.614089	-2.58101	RUVBL2;HSPA8;SMAD3;SMAD6;SMAD7;TRAF6;HDAC4;HDAC5;RELA;STAT3
PRKCI	1	42	0.00520833	0.00926539	-0.00405705	0.833363	14.6705	-2.67422	YWHAZ
NTRK1	1	39	0.00520833	0.00860357	-0.00339524	0.811069	13.7043	-2.8697	ABL1
JAK1	2	66	0.0104167	0.0145599	-0.00414323	0.771116	11.2886	-2.93409	STAT1;STAT3
CDK5	10	103	0.0520833	0.0227223	0.0293611	0.0158399	0.737417	-3.05676	NR3C1;MYC;TP53;ABL1;HTT;ERBB3;STAT3;CTNNB1;VIM;CDK5R1
MTOR	9	86	0.046875	0.018972	0.027903	0.014365	0.74287	-3.15197	EHMT2;YWHAQ;MYC;AKT1;YWHAZ;TOPORS;DNMT1;JUN;STAT3
DYRK1A	5	22	0.0260417	0.0048533	0.0211884	0.00409054	0.575761	-3.16615	SIRT1;CASP9;CREB1;TP53;YWHAG
CHEK1	6	35	0.03125	0.00772116	0.0235288	0.00570755	0.645885	-3.33662	RELA;E2F1;YWHAG;CSNK2B;TP53;TP73
CAMK2D	6	35	0.03125	0.00772116	0.0235288	0.00570755	0.71704	-3.70421	HDAC4;CEBPB;IKBKG;STAT1;CREB1;VIM
IKBKB	9	87	0.046875	0.0191926	0.0276824	0.0153113	0.907163	-3.79118	HNRNPU;C1QBP;IKBKG;PARP1;NCOA3;RELA;HSPA8;CDKN2A;CTNNB1
ERBB2	11	125	0.0572917	0.0275756	0.0297161	0.0216136	1.07792	-4.1332	H3F3A;ESR1;BCAR3;NCOA3;VAV1;NCOR1;ERBB3;ERBB4;STAT1;STAT3;CTNNB1
PAK1	9	92	0.046875	0.0202956	0.0265794	0.0207448	1.15439	-4.47379	YWHAG;CSNK2A1;CSNK2A2;HIST1H3A;ABL1;ESR1;SNAI1;VIM;CDK5R1
NTRK2	1	31	0.00520833	0.00683874	-0.0016304	0.736036	15.8506	-4.85785	TRAF6
MAP3K14	6	145	0.03125	0.0319876	-0.000737646	0.582448	9.31908	-5.03711	HNRNPU;RUVBL2;HSPA8;C1QBP;IKBKG;TRAF6
CDK1	33	567	0.171875	0.125083	0.0467923	0.0401512	1.62914	-5.23785	MYC;MYB;MED1;CSNK2A1;PRKAB1;AR;NFATC2;PHC3;EZH2;SETD8;NINL;SIRT1;DNMT1;ABL1;CEBPB;E2F1;SMARCC2;RUNX2;RUNX1;CSNK2B;TP53;TP73;MLL;NCOA3;NR5A1;POU2F1;ESR1;KDM5A;CASP9;HIST1H1A;CCNA1;MYOD1;VIM
PRKACB	10	120	0.0520833	0.0264725	0.0256108	0.037637	1.62079	-5.3158	GTF2I;PRKAB1;TP53;EGR1;POU2F1;SMAD3;CBX3;RBL2;PPP1R8;VIM
FGFR1	2	50	0.0104167	0.0110302	-0.000613556	0.631159	11.6244	-5.34953	ERBB3;CREBBP
PRKCE	3	70	0.015625	0.0154423	0.000182688	0.575443	9.81681	-5.42492	CREB1;CFTR;STAT3
IKBKE	7	60	0.0364583	0.0132363	0.0232221	0.0181286	1.43091	-5.73834	BTRC;IKBKE;SKP1;RELA;HSPA8;STAT1;ESR1
ACVR1	3	70	0.015625	0.0154423	0.000182688	0.575443	10.4311	-5.76441	WDR61;CREBBP;STAT1
MAP3K3	14	193	0.0729167	0.0425767	0.03034	0.0407696	1.90602	-6.09893	SMARCC2;C1QBP;IKBKG;DDB1;RUVBL2;MATR3;UBC;HSPA8;YWHAQ;YWHAG;YWHAZ;TRAF6;PFDN5;VIM
CSNK1G1	5	24	0.0260417	0.00529451	0.0207472	0.00563408	1.18446	-6.13421	YWHAQ;NFATC1;APC;CTNNB1;TP53
MAP3K1	11	139	0.0572917	0.030664	0.0266276	0.0405156	1.97352	-6.32723	DCAF7;RUVBL2;UBC;HSPA8;UBE2I;ESR1;YWHAZ;DDB1;RCN2;STAT3;VIM
INSR	8	175	0.0416667	0.0386058	0.00306089	0.468487	8.44602	-6.40416	ZBTB33;PHB;ABL1;YES1;VAV1;ATP1A1;ERBB3;PPP1R8
PRKCQ	6	45	0.03125	0.0099272	0.0213228	0.0163594	1.56815	-6.44973	HIST1H3A;CASP3;AKT1;IKBKG;YWHAG;VAV1
CAMK2A	5	105	0.0260417	0.0231635	0.0028782	0.464994	8.60474	-6.58892	MPDZ;CREB1;CEBPB;VIM;CDK5R1
FYN	15	216	0.078125	0.0476506	0.0304744	0.0472265	2.21994	-6.77704	CSNK2A1;YES1;H3F3A;VAV1;PAK2;STAT1;ITCH;CTNNB1;NR3C1;GTF2I;ZBTB33;MAX;ABL1;CASP3;ERBB3
TGFBR1	8	166	0.0416667	0.0366203	0.00504633	0.412055	7.79015	-6.90674	WDR61;SMAD3;SMURF2;SMAD6;SMAD7;TRAF6;STAT1;CTNNB1
CSF1R	1	25	0.00520833	0.00551511	-0.000306778	0.660913	16.7053	-6.91822	YES1
CSNK1A1	8	99	0.0416667	0.0218398	0.0198268	0.0681873	2.65053	-7.11799	TP53;YWHAQ;YWHAZ;CREB1;ATP1A1;VHL;APC;CTNNB1
LYN	7	144	0.0364583	0.031767	0.00469129	0.416187	8.23733	-7.22101	CSNK2A1;CSNK2B;ABL1;CASP9;CASP3;PPP1R8;PAK2
EGFR	15	247	0.078125	0.0544893	0.0236357	0.110601	3.45394	-7.60498	AR;HIST1H3A;YES1;VAV1;HTT;STAT1;STAT3;CTNNB1;SLC9A3R1;ESR1;YWHAZ;CEBPB;ATP1A1;ERBB3;ERBB4
PTK2	5	95	0.0260417	0.0209574	0.00508424	0.38384	7.96147	-7.62335	SUMO1;TP53;ERBB3;STAT1;APC
LCK	8	161	0.0416667	0.0355173	0.00614935	0.380587	8.13468	-7.85843	NR3C1;ABL1;YES1;ESR1;VAV1;ERBB3;STAT1;STAT3
HIPK3	5	26	0.0260417	0.00573572	0.020306	0.00754877	1.63348	-7.98178	ARRB2;SUMO1;MBD1;TOX4;AR
JAK2	7	92	0.0364583	0.0202956	0.0161627	0.106483	3.5731	-8.00292	GTF2I;VAV1;HIST1H3A;HSPA8;YES1;STAT1;STAT3
ROCK2	1	25	0.00520833	0.00551511	-0.000306778	0.660913	19.7311	-8.17133	VIM
PRKCB	16	283	0.0833333	0.0624311	0.0209023	0.15499	4.42564	-8.25114	AKT1;TP53;CFTR;TP73;PSMA3;PAK2;STAT3;CTNNB1;NR4A1;YWHAG;YWHAZ;RBL2;CREB1;CEBPB;APC;VIM
PRKCA	26	487	0.135417	0.107434	0.0279823	0.136094	4.16613	-8.30897	AKT1;AR;EWSR1;ABCB1;CREBBP;NFATC2;NFATC1;SLC9A3R1;ABL1;E2F1;TP53;CFTR;XRCC5;SMARCA5;TP73;C1QBP;EP300;SMAD3;ESR1;HIST1H1A;YWHAG;YWHAZ;RBL2;MYOD1;ATP1A1;VIM
BMPR1B	4	77	0.0208333	0.0169865	0.00384679	0.419576	9.671	-8.39937	DCAF7;TRAF6;SMAD6;SMAD7
PKN1	5	30	0.0260417	0.00661813	0.0194235	0.0126529	1.92421	-8.40853	HDAC5;HIST1H3A;CCDC85B;CASP3;VIM
PRKG1	8	114	0.0416667	0.0251489	0.0165178	0.121792	4.00304	-8.42815	GTF2I;CFTR;NFATC1;CREB1;CENPA;PAK2;APC;VIM
MAPK9	10	162	0.0520833	0.0357379	0.0163454	0.16027	4.66192	-8.53548	MYC;TP53;DNMT1;JUN;SMAD3;H3F3A;NFATC2;YWHAZ;STAT3;CTNNB1
PTK2B	4	70	0.0208333	0.0154423	0.00539102	0.354268	8.23866	-8.54927	VAV1;EWSR1;ERBB3;STAT3
CDK6	5	25	0.0260417	0.00551511	0.0205266	0.00654243	1.70928	-8.59672	CDKN2A;RUNX1;RBL2;AR;CTNNB1
SRC	17	346	0.0885417	0.0763291	0.0122125	0.304567	7.28293	-8.65841	AKT1;AR;EWSR1;IKBKG;EMD;VAV1;PAK2;STAT1;STAT3;CTNNB1;GTF2I;ABL1;ESR1;YWHAG;YWHAZ;TRAF6;SMARCE1
RPS6KA1	6	75	0.03125	0.0165453	0.0147047	0.110013	3.93292	-8.68059	KDM2B;CREB1;CEBPB;CREBBP;ESR1;NR4A1
RET	2	40	0.0104167	0.00882418	0.00159249	0.514305	13.1277	-8.72914	AKT1;STAT3
IGF1R	9	144	0.046875	0.031767	0.015108	0.168493	4.90506	-8.73523	GTF2I;UBC;YES1;ESR1;MDM2;YWHAG;YWHAZ;VAV1;STAT3
SGK1	6	76	0.03125	0.0167659	0.0144841	0.114921	4.08439	-8.8366	CREB1;MATR3;HTT;SLC9A3R2;PPP1R8;CTNNB1
MAP2K4	1	23	0.00520833	0.0050739	0.000134431	0.631417	19.5268	-8.97821	ARRB2
FES	1	23	0.00520833	0.0050739	0.000134431	0.631417	19.8597	-9.13126	STAT3
TBK1	6	59	0.03125	0.0130157	0.0182343	0.047195	3.05067	-9.31511	RUVBL2;AKT1;IKBKG;IKBKE;RELA;HSPA8
MAP3K4	1	21	0.00520833	0.00463269	0.00057564	0.59937	18.1991	-9.3157	RUNX2
RIPK3	6	95	0.03125	0.0209574	0.0102926	0.226663	6.29284	-9.3404	C1QBP;RUVBL2;WDR61;UBC;HSPA8;VIM
EPHB2	2	38	0.0104167	0.00838297	0.0020337	0.488197	13.0492	-9.35676	ABL1;GTF2I
HCK	6	77	0.03125	0.0169865	0.0142635	0.119939	4.43722	-9.41031	EMD;VAV1;ERBB3;ABL1;PAK2;STAT3
SYK	5	85	0.0260417	0.0187514	0.00729029	0.302377	7.92405	-9.47779	HNRNPU;VAV1;TRAF6;STAT1;STAT3
ERBB3	4	61	0.0208333	0.0134569	0.00737646	0.270702	7.37299	-9.63456	BCAR3;VAV1;ERBB3;ERBB4
DAPK1	1	21	0.00520833	0.00463269	0.00057564	0.59937	18.8811	-9.66477	TP53
PDGFRB	5	62	0.0260417	0.0136775	0.0123642	0.135006	4.82802	-9.66781	SLC9A3R2;SLC9A3R1;YES1;STAT1;STAT3
MAP2K1	5	39	0.0260417	0.00860357	0.0174381	0.0315948	2.80096	-9.67664	CASP9;MYC;EP300;TRAF6;MYOD1
PRKAA1	5	41	0.0260417	0.00904478	0.0169969	0.0373847	2.9938	-9.83909	HDAC5;EP300;PRKAB1;TP53;CFTR
MAP3K8	5	54	0.0260417	0.0119126	0.014129	0.0900795	4.17645	-10.053	CREB1;TRAF6;RELA;ABL1;HSPA8
RIPK2	5	48	0.0260417	0.010589	0.0154527	0.0625078	3.62782	-10.058	IKBKG;TRAF6;HSPA8;UBE2I;VIM
KIT	4	59	0.0208333	0.0130157	0.00781767	0.25258	7.32544	-10.08	ABL1;MPDZ;YES1;STAT1
SGK3	4	13	0.0208333	0.00286786	0.0179655	0.00414628	1.88007	-10.3132	HTT;SLC9A3R2;ITCH;CREB1
BTK	5	59	0.0260417	0.0130157	0.013026	0.117127	4.8438	-10.3875	GTF2I;VAV1;EWSR1;TP53;RELA
PDPK1	3	48	0.015625	0.010589	0.00503599	0.343325	9.79651	-10.4732	YWHAQ;AKT1;SLC9A3R2
RPS6KB1	5	48	0.0260417	0.010589	0.0154527	0.0625078	3.79978	-10.5347	AKT1;TP63;CSNK2B;ESR1;MDM2
IRAK1	5	39	0.0260417	0.00860357	0.0174381	0.0315948	3.09572	-10.695	SUMO1;IKBKG;JUN;STAT3;TRAF6
EIF2AK2	5	42	0.0260417	0.00926539	0.0167763	0.0405082	3.3511	-10.7445	HTT;CASP3;STAT1;STAT3;TP53
KDR	3	42	0.015625	0.00926539	0.00635961	0.275754	8.42549	-10.8541	YES1;STAT1;CTNNB1
AURKA	4	51	0.0208333	0.0112508	0.00958251	0.18338	6.44929	-10.9392	AR;TP53;CENPA;HIST1H3A
RIPK1	4	54	0.0208333	0.0119126	0.00892069	0.208594	7.08676	-11.1075	IKBKG;RCN2;HSPA8;ITCH
YES1	5	36	0.0260417	0.00794176	0.0180999	0.0240265	2.98973	-11.1475	YAP1;SLC9A3R1;TP53BP2;PAK2;YES1
NTRK3	1	19	0.00520833	0.00419148	0.00101685	0.564552	19.5096	-11.1541	JUN
CSNK2B	5	43	0.0260417	0.00948599	0.0165557	0.0437859	3.61384	-11.3057	CSNK2A1;ESR1;CSNK2B;CTNNB1;TP53
MAP2K7	1	21	0.00520833	0.00463269	0.00057564	0.59937	22.1835	-11.3552	TRAF6
ALK	4	25	0.0208333	0.00551511	0.0153182	0.0283234	3.25004	-11.5834	RELA;STAT3;MDM2;TP53
CSK	4	47	0.0208333	0.0103684	0.0104649	0.151521	6.15188	-11.6088	ERBB3;CREBBP;YES1;CTNNB1
JAK3	2	35	0.0104167	0.00772116	0.00269551	0.447451	14.469	-11.6358	STAT1;STAT3
MAPK7	1	20	0.00520833	0.00441209	0.000796244	0.582322	21.6296	-11.6958	MYC
GRK5	1	19	0.00520833	0.00419148	0.00101685	0.564552	20.5059	-11.7237	TP53
CSNK1A1L	4	12	0.0208333	0.00264725	0.0181861	0.00327339	2.06573	-11.82	APC;YWHAQ;CTNNB1;TP53
MST1R	4	19	0.0208333	0.00419148	0.0166418	0.0127527	2.7172	-11.8525	YES1;YWHAZ;RELA;YWHAQ
CAMK2B	2	32	0.0104167	0.00705934	0.00335732	0.404965	13.4143	-12.1259	CEBPB;CREB1
CHEK2	4	41	0.0208333	0.00904478	0.0117886	0.108364	5.47333	-12.1631	E2F1;HIST1H1C;MDM2;TP53
FGFR3	4	44	0.0208333	0.0097066	0.0111267	0.129182	5.94842	-12.1737	GTF3C1;STAT1;STAT3;POLA2
CAMK2G	4	40	0.0208333	0.00882418	0.0120092	0.101791	5.34019	-12.2015	CEBPB;SMAD3;STAT1;CREB1
MET	4	38	0.0208333	0.00838297	0.0124504	0.0892249	5.0665	-12.2437	CASP3;STAT3;VAV1;CTNNB1
MAP3K5	4	40	0.0208333	0.00882418	0.0120092	0.101791	5.40587	-12.3515	ARRB2;YWHAQ;YWHAZ;TRAF6
PDK1	2	31	0.0104167	0.00683874	0.00357793	0.390458	13.3309	-12.5368	YWHAQ;AKT1
ERBB4	3	41	0.015625	0.00904478	0.00658022	0.264595	9.48683	-12.6133	YAP1;ERBB3;ERBB4
MARK4	1	19	0.00520833	0.00419148	0.00101685	0.564552	22.2792	-12.7375	YWHAZ
AKT2	3	41	0.015625	0.00904478	0.00658022	0.264595	9.71689	-12.9192	AKT1;ESR1;CTNNB1
FLT1	4	23	0.0208333	0.0050739	0.0157594	0.0222831	3.40697	-12.9599	YES1;STAT1;STAT3;CTNNB1
CSNK1G3	4	11	0.0208333	0.00242665	0.0184067	0.00253468	2.18563	-13.065	APC;YWHAQ;CTNNB1;TP53
ROCK1	4	44	0.0208333	0.0097066	0.0111267	0.129182	6.61038	-13.5284	HIST1H3A;CASP3;VIM;CFTR
CSNK1G2	4	15	0.0208333	0.00330907	0.0175243	0.00633624	2.70868	-13.7099	APC;YWHAQ;CTNNB1;TP53
STK11	2	32	0.0104167	0.00705934	0.00335732	0.404965	15.684	-14.1776	SMARCA4;TP53
TNK2	2	27	0.0104167	0.00595632	0.00446035	0.331025	12.9222	-14.2864	AKT1;AR
TRRAP	4	11	0.0208333	0.00242665	0.0184067	0.00253468	2.39076	-14.2912	MAX;MYC;E2F1;ESR1
TYK2	3	30	0.015625	0.00661813	0.00900687	0.148546	7.50333	-14.3078	STAT1;XRCC5;VAV1
TEC	2	25	0.0104167	0.00551511	0.00490156	0.300682	12.187	-14.6452	VAV1;TP53
NUAK1	2	31	0.0104167	0.00683874	0.00357793	0.390458	16.0288	-15.0741	PRKAB1;YWHAZ
TGFBR2	3	37	0.015625	0.00816236	0.00746264	0.22067	10.0721	-15.2198	SMAD3;SMAD7;CTNNB1
BMPR1A	1	17	0.00520833	0.00375028	0.00145806	0.526725	24.2998	-15.578	ZMYND11
MAP4K1	2	25	0.0104167	0.00551511	0.00490156	0.300682	13.1954	-15.8569	CASP3;ABL1
PDGFRA	3	31	0.015625	0.00683874	0.00878626	0.158342	8.659	-15.9585	SLC9A3R1;STAT1;STAT3
PRKD2	2	27	0.0104167	0.00595632	0.00446035	0.331025	14.4816	-16.0103	HDAC5;MTF2
MARK3	2	26	0.0104167	0.00573572	0.00468095	0.315891	14.0782	-16.2232	YWHAG;YWHAZ
BMX	4	14	0.0208333	0.00308846	0.0177449	0.00516388	3.0935	-16.2906	STAT1;STAT3;CASP3;TP53
MYLK	1	16	0.00520833	0.00352967	0.00167866	0.506604	24.408	-16.5981	PAK2
MAPK11	3	27	0.015625	0.00595632	0.00966868	0.120461	7.88075	-16.6791	E2F1;JUN;EWSR1
PKD1	3	27	0.015625	0.00595632	0.00966868	0.120461	8.10672	-17.1573	ATF7IP;CTNNB1;VIM
CDK3	4	30	0.0208333	0.00661813	0.0142152	0.0473194	5.65464	-17.2514	E2F1;JUN;TFDP1;TFCP2
CAMK1	3	24	0.015625	0.00529451	0.0103305	0.094636	7.34434	-17.3159	HDAC5;EP300;CREB1
SRPK1	2	24	0.0104167	0.00529451	0.00512216	0.285419	13.8113	-17.3165	YWHAG;CSNK2B
ABL2	3	23	0.015625	0.0050739	0.0105511	0.0865968	7.08426	-17.3316	CEBPB;ERBB3;ERBB4
ILK	2	25	0.0104167	0.00551511	0.00490156	0.300682	14.8283	-17.8192	CASP9;AKT1
ARAF	2	24	0.0104167	0.00529451	0.00512216	0.285419	14.309	-17.9406	YWHAG;CSNK2B
DAPK3	3	23	0.015625	0.0050739	0.0105511	0.0865968	7.63772	-18.6856	HIST1H3A;MDM2;TP53
MINK1	1	14	0.00520833	0.00308846	0.00211987	0.463773	24.6573	-18.9457	YWHAZ
FGR	2	22	0.0104167	0.0048533	0.00556337	0.254824	14.094	-19.2691	CSNK2A1;YWHAQ
MAP2K3	2	20	0.0104167	0.00441209	0.00600458	0.224311	12.8987	-19.28	SMAD3;SMAD7
BRAF	3	21	0.015625	0.00463269	0.0109923	0.0714537	7.44352	-19.6412	YWHAZ;YWHAQ;YWHAG
LIMK1	1	15	0.00520833	0.00330907	0.00189927	0.485632	27.6126	-19.9447	YWHAZ
BUB1B	1	14	0.00520833	0.00308846	0.00211987	0.463773	26.1804	-20.116	HDAC1
GRK6	1	16	0.00520833	0.00352967	0.00167866	0.506604	30.1607	-20.5101	SLC9A3R1
DMPK	1	15	0.00520833	0.00330907	0.00189927	0.485632	28.4679	-20.5625	SP1
RPS6KA2	2	21	0.0104167	0.00463269	0.00578397	0.239543	14.5013	-20.7227	ESR1;CREB1
MAP2K2	1	15	0.00520833	0.00330907	0.00189927	0.485632	28.8941	-20.8703	CASP9
ACVR1B	1	14	0.00520833	0.00308846	0.00211987	0.463773	27.8716	-21.4154	SMAD7
MKNK1	1	13	0.00520833	0.00286786	0.00234048	0.44099	26.2613	-21.501	PAK2
MAP3K10	2	21	0.0104167	0.00463269	0.00578397	0.239543	15.0725	-21.5389	HTT;PHB
STK4	3	18	0.015625	0.00397088	0.0116541	0.0512645	7.44714	-22.1237	CASP3;ABL1;TP53
NEK6	3	15	0.015625	0.00330907	0.0123159	0.0343611	6.56722	-22.137	SMURF2;RBL2;CCDC85B
MAP3K2	2	18	0.0104167	0.00397088	0.00644579	0.194122	13.5786	-22.2589	YWHAZ;YWHAG
FER	3	16	0.015625	0.00352967	0.0120953	0.0396157	6.96585	-22.4895	STAT3;ERBB3;CTNNB1
MAPKAPK5	2	20	0.0104167	0.00441209	0.00600458	0.224311	15.1455	-22.6383	JUN;TP53
MELK	3	14	0.015625	0.00308846	0.0125365	0.0294949	6.45651	-22.7498	SMAD3;SMAD7;PPP1R8
IRAK2	1	15	0.00520833	0.00330907	0.00189927	0.485632	31.6585	-22.8671	TRAF6
MAP2K6	3	17	0.015625	0.00375028	0.0118747	0.0452527	7.47206	-23.1297	RELA;SMAD7;TRAF6
CLK1	2	17	0.0104167	0.00375028	0.00666639	0.179235	13.4957	-23.1999	ABL1;YWHAG
CDK14	1	12	0.00520833	0.00264725	0.00256108	0.417244	27.1126	-23.6986	YWHAQ
PBK	2	18	0.0104167	0.00397088	0.00644579	0.194122	14.5433	-23.8404	HIST1H3A;TP53
TTK	3	14	0.015625	0.00308846	0.0125365	0.0294949	6.81551	-24.0147	ABL1;E2F1;TP53
DYRK1B	3	15	0.015625	0.00330907	0.0123159	0.0343611	7.1816	-24.2079	HDAC5;H3F3A;DCAF7
PLK3	2	18	0.0104167	0.00397088	0.00644579	0.194122	14.9244	-24.465	JUN;TP53
NEK1	3	18	0.015625	0.00397088	0.0116541	0.0512645	8.31046	-24.6884	WWTR1;ZNF350;ATRX
MARK2	3	17	0.015625	0.00375028	0.0118747	0.0452527	8.03572	-24.8745	HDAC4;HDAC5;YWHAZ
CDK11B	3	15	0.015625	0.00330907	0.0123159	0.0343611	7.50609	-25.3017	YWHAQ;CASP3;YWHAG
TRIB3	3	16	0.015625	0.00352967	0.0120953	0.0396157	7.90068	-25.5076	SETDB1;RELA;AKT1
EPHB1	1	13	0.00520833	0.00286786	0.00234048	0.44099	31.5256	-25.811	STAT3
PRKAA2	3	17	0.015625	0.00375028	0.0118747	0.0452527	8.35371	-25.8588	HDAC5;PRKAB1;TP53
FGFR4	2	18	0.0104167	0.00397088	0.00644579	0.194122	16.0397	-26.2934	STAT1;STAT3
PAK4	2	16	0.0104167	0.00352967	0.006887	0.164538	14.6152	-26.3747	YWHAZ;YWHAG
NLK	3	14	0.015625	0.00308846	0.0125365	0.0294949	7.51009	-26.4621	CREBBP;STAT3;MYB
PRKG2	2	17	0.0104167	0.00375028	0.00666639	0.179235	15.4275	-26.5207	CREB1;CFTR
STK3	3	10	0.015625	0.00220604	0.013419	0.0139742	6.21276	-26.5318	YAP1;CASP3;ABL1
MAPKAPK3	3	9	0.015625	0.00198544	0.0136396	0.011076	6.02764	-27.1423	PHC2;CBX4;BMI1
FLT4	1	12	0.00520833	0.00264725	0.00256108	0.417244	31.2449	-27.3106	ATF7IP
CDC7	2	18	0.0104167	0.00397088	0.00644579	0.194122	16.8767	-27.6654	CDKN2A;CHAF1A
PTK6	3	12	0.015625	0.00264725	0.0129777	0.0209438	7.24407	-28.0049	ERBB3;AKT1;CTNNB1
CDK16	3	10	0.015625	0.00220604	0.013419	0.0139742	6.60115	-28.1905	YWHAZ;YWHAG;CDK5R1
HSPB8	1	12	0.00520833	0.00264725	0.00256108	0.417244	33.6512	-29.4139	CSNK2A1
MKNK2	1	9	0.00520833	0.00198544	0.00322289	0.339818	27.2842	-29.449	ESR1
PDK2	1	11	0.00520833	0.00242665	0.00278168	0.392495	32.3168	-30.2236	HTT
BUB1	2	14	0.0104167	0.00308846	0.0073282	0.135888	15.2741	-30.4859	HDAC1;APC
CDK8	2	15	0.0104167	0.00330907	0.0071076	0.150074	16.3632	-31.0348	SMAD3;MED6
MAST2	1	11	0.00520833	0.00242665	0.00278168	0.392495	34.2836	-32.0631	TRAF6
VRK1	3	8	0.015625	0.00176484	0.0138602	0.00855999	6.77174	-32.2379	JUN;HIST1H3A;TP53
HIPK1	3	8	0.015625	0.00176484	0.0138602	0.00855999	6.86499	-32.6818	NKX2-5;TP53;RUNX1
SGK2	2	10	0.0104167	0.00220604	0.00821062	0.0829664	13.1866	-32.8257	CREB1;HTT
MAP4K5	1	8	0.00520833	0.00176484	0.0034435	0.3118	28.2002	-32.8643	ABL1
TYRO3	1	9	0.00520833	0.00198544	0.00322289	0.339818	31.7793	-34.3008	YES1
IRAK4	1	10	0.00520833	0.00220604	0.00300229	0.366701	34.325	-34.4351	TRAF6
MATK	1	9	0.00520833	0.00198544	0.00322289	0.339818	32.9515	-35.566	EWSR1
CAMKK1	2	11	0.0104167	0.00242665	0.00799002	0.0955105	15.3032	-35.9399	AKT1;YWHAG
PIM2	1	9	0.00520833	0.00198544	0.00322289	0.339818	33.9939	-36.6911	MYC
GAK	3	11	0.015625	0.00242665	0.0131984	0.017262	9.05282	-36.7477	AR;HSPA8;CREBBP
RPS6KA4	2	10	0.0104167	0.00220604	0.00821062	0.0829664	14.7794	-36.7907	CREB1;RELA
WNK1	1	9	0.00520833	0.00198544	0.00322289	0.339818	34.2036	-36.9175	YWHAG
MOS	2	9	0.0104167	0.00198544	0.00843123	0.0709847	14.1791	-37.5078	MYOD1;VIM
TLK1	2	10	0.0104167	0.00220604	0.00821062	0.0829664	15.2855	-38.0505	HIST1H3A;HIST1H1A
PIK3CB	1	8	0.00520833	0.00176484	0.0034435	0.3118	33.2626	-38.7641	YWHAQ
PKN2	2	9	0.0104167	0.00198544	0.00843123	0.0709847	14.8399	-39.256	CASP3;AKT1
CDK17	2	6	0.0104167	0.00132363	0.00909304	0.0391325	12.1688	-39.4368	YWHAZ;YWHAG
EPHA3	2	11	0.0104167	0.00242665	0.00799002	0.0955105	16.8326	-39.5318	STAT3;TP53
DYRK3	3	4	0.015625	0.000882418	0.0147426	0.00204849	6.69048	-41.4184	CREB1;H3F3A;SIRT1
KSR1	1	8	0.00520833	0.00176484	0.0034435	0.3118	36.247	-42.2421	YWHAZ
DYRK2	2	13	0.0104167	0.00286786	0.00754881	0.12203	20.1633	-42.4133	H3F3A;TP53
BRD2	3	7	0.015625	0.00154423	0.0140808	0.00641541	8.45579	-42.6937	KDM5A;RBL2;E2F1
STK38	1	7	0.00520833	0.00154423	0.0036641	0.282599	33.8037	-42.7187	YWHAZ
MLTK	2	9	0.0104167	0.00198544	0.00843123	0.0709847	16.16	-42.7479	HIST1H3A;YWHAG
KALRN	1	8	0.00520833	0.00176484	0.0034435	0.3118	37.8207	-44.0761	SUMO2
PRPF4B	1	8	0.00520833	0.00176484	0.0034435	0.3118	37.9717	-44.252	YWHAG
EIF2AK4	1	6	0.00520833	0.00132363	0.00388471	0.252165	32.2342	-44.4081	EWSR1
LATS1	1	7	0.00520833	0.00154423	0.0036641	0.282599	36.9215	-46.6586	YAP1
SMG1	1	8	0.00520833	0.00176484	0.0034435	0.3118	40.7384	-47.4763	TP53
PRKD3	1	7	0.00520833	0.00154423	0.0036641	0.282599	38.9851	-49.2666	HDAC5
STK24	1	6	0.00520833	0.00132363	0.00388471	0.252165	35.8248	-49.3547	CASP3
MERTK	1	7	0.00520833	0.00154423	0.0036641	0.282599	39.1313	-49.4513	VAV1
SIK1	1	5	0.00520833	0.00110302	0.00410531	0.220448	33.1198	-50.0801	YWHAZ
AURKC	1	4	0.00520833	0.000882418	0.00432592	0.187393	31.1188	-52.1099	HIST1H3A
TTBK1	1	6	0.00520833	0.00132363	0.00388471	0.252165	37.8375	-52.1276	CDK5R1
CAMKK2	1	6	0.00520833	0.00132363	0.00388471	0.252165	38.1043	-52.4952	AKT1
MAPK15	2	7	0.0104167	0.00154423	0.00887244	0.0489909	17.7751	-53.6119	JUN;NR3C1
LATS2	2	5	0.0104167	0.00110302	0.00931364	0.0301444	15.6977	-54.9696	YAP1;YWHAG
CDK18	2	6	0.0104167	0.00132363	0.00909304	0.0391325	17.3577	-56.253	CCDC85B;YWHAZ
CLK4	1	5	0.00520833	0.00110302	0.00410531	0.220448	37.2372	-56.3061	ABL1
TSSK4	2	3	0.0104167	0.000661813	0.00975485	0.0151468	13.5112	-56.6113	CREB1;SMURF2
PRKX	1	5	0.00520833	0.00110302	0.00410531	0.220448	40.2374	-60.8427	SMAD6
ULK2	2	6	0.0104167	0.00132363	0.00909304	0.0391325	18.7991	-60.9243	POLA2;SETDB1
CDK20	1	5	0.00520833	0.00110302	0.00410531	0.220448	41.0068	-62.0061	CSNK2B
ULK1	1	5	0.00520833	0.00110302	0.00410531	0.220448	41.7606	-63.146	GABARAPL2
TLK2	1	6	0.00520833	0.00132363	0.00388471	0.252165	48.2898	-66.5274	YWHAZ
TSSK6	1	3	0.00520833	0.000661813	0.00454652	0.152944	35.7242	-67.0788	HSPA8
CAMK1D	1	4	0.00520833	0.000882418	0.00432592	0.187393	40.3041	-67.4912	EP300
IRAK3	1	6	0.00520833	0.00132363	0.00388471	0.252165	56.3781	-77.6704	TRAF6
PAK6	2	3	0.0104167	0.000661813	0.00975485	0.0151468	18.8369	-78.9261	AR;ESR1
VRK2	1	5	0.00520833	0.00110302	0.00410531	0.220448	52.3883	-79.216	TP53
TP53RK	1	4	0.00520833	0.000882418	0.00432592	0.187393	48.1008	-80.547	TP53
NEK3	1	5	0.00520833	0.00110302	0.00410531	0.220448	56.7455	-85.8045	VAV1
STK25	1	4	0.00520833	0.000882418	0.00432592	0.187393	51.3813	-86.0404	YWHAZ
STRADB	1	5	0.00520833	0.00110302	0.00410531	0.220448	57.1403	-86.4014	TRAF6
MOK	2	3	0.0104167	0.000661813	0.00975485	0.0151468	21.3958	-89.6476	JUN;MYC
GSG2	1	1	0.00520833	0.000220604	0.00498773	0.0796269	35.4514	-89.7065	HIST1H3A
EPHA1	1	3	0.00520833	0.000661813	0.00454652	0.152944	48.5788	-91.2157	SMURF2
CLK2	1	4	0.00520833	0.000882418	0.00432592	0.187393	58.352	-97.7132	YWHAG
CAMK1G	1	3	0.00520833	0.000661813	0.00454652	0.152944	52.3165	-98.2339	EP300
NPR1	1	4	0.00520833	0.000882418	0.00432592	0.187393	58.7287	-98.344	ATF7IP
SNRK	2	3	0.0104167	0.000661813	0.00975485	0.0151468	23.5929	-98.8535	JUN;NFATC2
TRIM33	1	2	0.00520833	0.000441209	0.00476712	0.117042	49.3959	-105.965	TRIM24
LMTK2	2	4	0.0104167	0.000882418	0.00953425	0.022117	29.3849	-111.998	CFTR;CDK5R1
RNASEL	1	3	0.00520833	0.000661813	0.00454652	0.152944	68.713	-129.021	AR
SIK3	1	2	0.00520833	0.000441209	0.00476712	0.117042	68.7824	-147.553	YWHAZ
KIAA0999	1	2	0.00520833	0.000441209	0.00476712	0.117042	68.7824	-147.553	YWHAZ
STK40	1	3	0.00520833	0.000661813	0.00454652	0.152944	90.1429	-169.26	POLA2
CLK3	1	2	0.00520833	0.000441209	0.00476712	0.117042	81.5416	-174.925	YWHAG
TAF1L	1	1	0.00520833	0.000220604	0.00498773	0.0796269	73.6998	-186.49	TBP
PIKFYVE	1	2	0.00520833	0.000441209	0.00476712	0.117042	89.5443	-192.092	AKT1
STK17A	1	2	0.00520833	0.000441209	0.00476712	0.117042	89.7612	-192.558	TP53
RPS6KA6	1	1	0.00520833	0.000220604	0.00498773	0.0796269	122.329	-309.543	NR4A1
SLK	1	2	0.00520833	0.000441209	0.00476712	0.117042	190.919	-409.563	CASP3

## Sheet: SuppData3 E2K orange.results_tf
TF	Target/Input	Targets/Database	Fraction/Input	Fraction/Database	Difference	P-value	Z-score	Combined Score	Genes
NANOG-18347094	20	1908	0.176991	0.0453605	0.131631	1.93723e-07	-1.74564	26.9821	HEXIM1;3110082I17RIK;SLCO2A1;TRH;HIP1;EIF1;CDC42EP4;LRRC57;NTN1;KIF11;MLX;MIDN;S100A13;ANKRD55;GRAMD3;CDSN;RASIP1;STAC2;CAR11;PDE7A
TCF3-18347094	21	2221	0.185841	0.0528017	0.133039	4.92045e-07	-1.57731	22.9099	MTMR11;TTF1;ETV6;CBL;SLCO2A1;TRH;EIF1;HIST2H2BE;CDC42EP4;NTN1;KIF11;MIDN;ASB1;RREB1;PRSS16;GRAMD3;GTF2E2;CDSN;STAC2;HIST1H1C;PDE7A
EED-16625203	11	830	0.0973451	0.0197323	0.0776128	1.7052e-05	-2.03588	22.3525	PCDHGA12;HIST2H2BE;9930014A18RIK;NTN1;PCSK9;HIST2H3C2;GATM;AGBL2;SLCO2A1;CAR11;RGS10
NANOG-18692474	25	3052	0.221239	0.0725578	0.148681	4.81084e-07	-1.43425	20.8643	HEXIM1;TTF1;ETV6;SLCO2A1;TRH;TPRKB;EIF1;PCDHGA12;CDC42EP4;NTN1;LYSMD1;KIF11;MLX;S100A13;RREB1;ANKRD55;GRAMD3;CDSN;RASIP1;STAC2;CAR11;COX7A1;PDZD7;HIST1H1C;PDE7A
TAL1-20566737	18	1875	0.159292	0.044576	0.114716	2.9236e-06	-1.34517	17.141	AKT2;NARF;ODF3B;TRH;TPRKB;EIF1;CDC42EP4;SOCS1;PCSK9;ASB1;RREB1;HIST2H3C2;TET2;ZFP609;GYPC;CMPK2;HIST1H1C;RGS10
SUZ12-20075857	34	4356	0.300885	0.103559	0.197326	7.08871e-09	-0.896389	16.8205	TTC22;GATM;TRH;PCDHGA12;SOCS1;PCSK9;GRAMD3;PISD-PS1;GNG11;STAC2;CAR11;RGS10;CENPV;NRGN;GPRIN3;ODF3B;ECEL1;RAB31;SLCO2A1;HIP1;6330403K07RIK;MLXIPL;NTN1;ID4;2810032G03RIK;RREB1;PRSS16;ITPRIPL2;COL25A1;GYPC;RHOQ;RASIP1;KCTD1;CMPK2
ZFP281-18757296	17	2004	0.150442	0.0476428	0.1028	2.75654e-05	-1.4498	15.2214	GGNBP1;ETV6;ECEL1;EIF1;CDC42EP4;MLXIPL;TMIE;NTN1;MIER1;MIDN;2810032G03RIK;RREB1;CACNB1;COL25A1;GYPC;HIST1H4I;STAC2
RCOR3-21632747	23	2851	0.20354	0.0677793	0.135761	1.95974e-06	-1.13221	14.8803	UNC119B;CENPV;SMYD1;GGNBP1;NARF;TTC22;TRH;TRPC7;MLXIPL;ZFP2;MIDN;2810032G03RIK;FAM131C;ASB1;RREB1;CDC42SE2;INTU;CDSN;STAC2;KCTD1;KCTD5;DNAJC24;HIST1H1C
YAP1-20516196	20	2329	0.176991	0.0553693	0.121622	4.09264e-06	-1.14936	14.2593	HEXIM1;UBXN2B;GPRIN3;ETV6;TRPC7;D10WSU102E;NTN1;ID4;PCSK9;RREB1;CDC42SE2;TET2;ANKRD55;GRAMD3;COL25A1;GYPC;INTU;PARP14;RANBP9;HIST1H1C
SCL-21571218	17	1784	0.150442	0.0424126	0.10803	6.26728e-06	-1.1544	13.8299	HEXIM1;NRGN;ETV6;RAB31;TPRKB;HIP1;EIF1;TMIE;ERMN;ASB1;ANKRD55;SRXN1;GYPC;GNG11;CMPK2;LCA5;RGS10
GATA4-21415370	16	2039	0.141593	0.0484749	0.093118	0.000119849	-1.49439	13.4933	AKT2;MRPS17;CBL;HIP1;MLXIPL;MIER1;MIDN;ASB1;RREB1;CDC42SE2;CSRP2;SRXN1;SERHL;KCTD5;COX7A1;RGS10
CCND1-20090754	17	2137	0.150442	0.0508047	0.0996377	6.0925e-05	-1.38986	13.4898	HEXIM1;ZFP438;NARF;HIP1;CDC42EP4;D10WSU102E;SOCS1;MLX;MIDN;ASB1;RREB1;CACNB1;ZFP78;COL25A1;RHOQ;RANBP9;HIST1H1C
SOX2-18692474	23	3319	0.20354	0.0789055	0.124634	2.31306e-05	-1.1824	12.6214	ETV6;TRH;PCDHGA12;HIST2H2BE;MLX;ASB1;GRAMD3;PARP14;HIST1H4I;STAC2;HIST1H1C;PDE7A;SLCO2A1;HIP1;EIF1;NTN1;KIF11;MIDN;S100A13;RREB1;CDSN;COX7A1;PDZD7
GATA2-19941826	17	2410	0.150442	0.057295	0.0931475	0.000254538	-1.45571	12.0475	GZMM;NARF;HIP1;CDC42EP4;MLXIPL;ID4;ERMN;ASB1;RREB1;CDC42SE2;ANKRD55;COL25A1;GYPC;INTU;RANBP9;CMPK2;LCA5
GATA1-19941826	9	967	0.079646	0.0229893	0.0566567	0.00128356	-1.74397	11.6116	HEXIM1;CDC42EP4;MLXIPL;NARF;ERMN;ASB1;ANKRD55;RANBP9;CMPK2
E2F4-17652178	9	1002	0.079646	0.0238214	0.0558246	0.00163349	-1.78738	11.4697	HEXIM1;HIST2H2BE;KIF11;TTF1;S100A13;TPRKB;GYPC;RASIP1;HIST1H1C
SUZ12-18974828	16	1932	0.141593	0.0459311	0.0956618	6.44044e-05	-1.1773	11.3613	NRGN;GPRIN3;ECEL1;GATM;RAB31;PCDHGA12;MLXIPL;NTN1;ID4;PCSK9;AGBL2;COL25A1;STAC2;CAR11;KCTD1;RGS10
NANOG-21062744	9	840	0.079646	0.01997	0.059676	0.00048201	-1.47399	11.2577	HEXIM1;EIF1;CDC42EP4;MIER1;CSRP2;RPL15;ZFP37;STAC2;LCA5
CHD1-19587682	9	843	0.079646	0.0200414	0.0596047	0.00049434	-1.46845	11.1783	HEXIM1;EIF1;MRPL49;SMYD1;CBL;HIST2H3C2;CACNB1;HIST1H4I;HIST1H1C
HNF4A-19822575	39	6083	0.345133	0.144616	0.200516	8.51362e-08	-0.649885	10.5795	HEXIM1;ETV6;GATM;AKIRIN1;CDC42EP4;SOCS1;MIER1;PCSK9;ASB1;ANKRD55;ZFP37;PARP14;HIST1H1C;LCA5;PDE7A;AKT2;MTMR11;LIN52;UBXN2B;RAB31;TPRKB;MLXIPL;NTN1;LYSMD1;MIDN;S100A16;S100A13;RREB1;TET2;TET1;AGBL2;GTF2E2;ITPRIPL2;SRXN1;RHOQ;RANBP9;KCTD1;KCTD5;PDZD7
MTF2-20144788	22	2981	0.19469	0.0708699	0.12382	1.38305e-05	-0.924463	10.3435	NRGN;ECEL1;GATM;RAB31;SLCO2A1;PCDHGA12;SOCS1;MLXIPL;NTN1;ID4;PCSK9;MLX;RREB1;CDC42SE2;COL25A1;ZFP612;INTU;GYPC;GNG11;STAC2;KCTD1;RGS10
FLI1-20887958	17	2030	0.150442	0.0482609	0.102182	3.23682e-05	-0.99143	10.2497	GGNBP1;TTF1;RSL24D1;TPRKB;GPSM3;LYSMD1;MLX;MIDN;ASB1;HIST2H3C2;PRSS16;GTF2E2;ZFP609;HIST1H4I;RHOQ;KCTD1;HIST1H1C
SMAD1-18555785	7	610	0.0619469	0.0145021	0.0474448	0.00140773	-1.5265	10.0226	PRSS16;ZFP37;TRH;NTN1;CDSN;HIST1H4I;HIST1H1C
SUZ12-18555785	10	1058	0.0884956	0.0251527	0.0633428	0.000614465	-1.31812	9.74717	NTN1;ID4;PCSK9;TTC22;ECEL1;GATM;COL25A1;GYPC;KCTD1;RGS10
PRDM14-21183938	16	1944	0.141593	0.0462164	0.0953765	6.92118e-05	-1.01523	9.72423	HEXIM1;CENPV;SLCO2A1;TRH;EIF1;PCDHGA12;CDC42EP4;NTN1;ID4;KIF11;MIDN;RREB1;CSRP2;TET2;GRAMD3;INTU
POU5F1-18692474	26	4233	0.230088	0.100635	0.129454	4.83913e-05	-0.89871	8.92976	HEXIM1;CBL;TRH;PCDHGA12;HIST2H2BE;ASB1;GRAMD3;PARP14;STAC2;HIST1H1C;PDE7A;NRGN;NARF;TTF1;SLCO2A1;MRPL49;MLXIPL;NTN1;KIF11;CDC42SE2;COL25A1;INTU;CDSN;KCTD5;COX7A1;PDZD7
PDX1-19855005	7	669	0.0619469	0.0159047	0.0460422	0.00235364	-1.47431	8.92221	HEXIM1;GRAMD3;RPL15;TPRKB;PCSK9;RHOQ;NARF
TET1-21451524	15	1839	0.132743	0.0437201	0.0890232	0.000131213	-0.938175	8.38606	HEXIM1;MTMR11;SMYD1;UBXN2B;ECEL1;RAB31;SLC25A34;PCSK9;MLX;MIDN;FAM131C;RREB1;GRAMD3;CACNB1;GNG11
WT1-20215353	13	1663	0.115044	0.0395359	0.0755083	0.000563473	-1.11057	8.30857	HEXIM1;ETV6;GPSM3;D10WSU102E;SOCS1;NTN1;MIDN;RREB1;CACNB1;RHOQ;STAC2;CAR11;HIST1H1C
SETDB1-19884257	17	2353	0.150442	0.0559399	0.0945026	0.000192621	-0.967883	8.28003	TTF1;GPRIN3;RAB31;TRH;6330403K07RIK;EIF1;PCDHGA12;D10WSU102E;CSRP2;SERHL;ZFP612;ZFP617;CDSN;STAC2;KCTD1;HIST1H1C;PDE7A
RNF2-16625203	10	1219	0.0884956	0.0289803	0.0595152	0.00176023	-1.30484	8.2757	PCDHGA12;HIST2H2BE;9930014A18RIK;NTN1;HIST2H3C2;GATM;AGBL2;RAB31;SLCO2A1;HIST1H4I
MYC-18358816	22	3413	0.19469	0.0811402	0.11355	0.000104512	-0.897124	8.22323	HEXIM1;ZFP438;GPSM3;PCDHGA12;D10WSU102E;STK36;RPL15;PARP14;CAR11;3110082I17RIK;TPRKB;MRPL49;LRRC57;NTN1;PRC1;ZFP2;KIF11;MIDN;S100A13;CACNB1;RASIP1;KCTD5
YY1-21170310	6	464	0.0530973	0.0110311	0.0420663	0.00171832	-1.26751	8.06948	HEXIM1;TET1;ZFP37;ZFP617;INTU;NARF
EGR1-20690147	36	6207	0.318584	0.147564	0.17102	3.67995e-06	-0.641737	8.02981	CBL;TRH;CDC42EP4;MIER1;PCSK9;ASB1;RPL15;STAC2;ECEL1;RAB31;HIP1;TMIE;ID4;MIDN;DOK3;S100A16;S100A13;RREB1;RHOQ;RANBP9;KCTD1;HEXIM1;GZMM;TTC22;ETV6;SLC25A34;AKT2;NRGN;EIF1;MLXIPL;NTN1;PRSS16;CACNB1;SRXN1;COL25A1;RASIP1
FOXA2-19822575	21	2968	0.185841	0.0705608	0.11528	4.14605e-05	-0.745205	7.5197	AKT2;NARF;ETV6;GATM;SLCO2A1;AKIRIN1;HIP1;MLXIPL;ASB1;S100A16;S100A13;RREB1;TET1;ANKRD55;GTF2E2;ITPRIPL2;RANBP9;KCTD1;CMPK2;PDZD7;RGS10
REST-19997604	13	2118	0.115044	0.050353	0.0646912	0.00468081	-1.38647	7.4374	HEXIM1;9930014A18RIK;CBL;TRPC7;ZFP2;MLX;RREB1;CDC42SE2;SRXN1;RANBP9;CAR11;HIST1H1C;PDE7A
EOMES-20176728	13	1744	0.115044	0.0414616	0.0735826	0.000870562	-1.05505	7.43429	TTF1;RAB31;MLXIPL;ID4;PCSK9;KIF11;RREB1;CDC42SE2;HIST2H3C2;RPL15;GTF2E2;RANBP9;HIST1H1C
SUZ12-16625203	10	1270	0.0884956	0.0301928	0.0583028	0.0023642	-1.21277	7.334	PCDHGA12;9930014A18RIK;NTN1;PCSK9;AGBL2;SLCO2A1;HIP1;STAC2;CAR11;RGS10
SUZ12-18692474	14	1909	0.123894	0.0453843	0.0785095	0.000640425	-0.991017	7.28732	ECEL1;GATM;RAB31;SLCO2A1;PCDHGA12;NTN1;ID4;PCSK9;RREB1;COL25A1;STAC2;CAR11;KCTD1;RGS10
KLF4-18555785	17	2444	0.150442	0.0581033	0.0923392	0.000299212	-0.897887	7.28578	HEXIM1;LIN52;3110082I17RIK;ZFP438;MRPS17;NARF;CBL;TPRKB;LRRC57;TMIE;KIF11;MIDN;ASB1;RREB1;CDC42SE2;ZFP78;COX7A1
ESR1-21235772	4	228	0.0353982	0.00542044	0.0299778	0.00359701	-1.29066	7.26337	MIDN;RAB31;SLCO2A1;CBL
RARG-19884340	5	390	0.0442478	0.00927181	0.034976	0.00431816	-1.31595	7.16526	CACNB1;ZFP438;RHOQ;MIDN;HIST1H1C
KLF1-20508144	10	1144	0.0884956	0.0271973	0.0612983	0.00110489	-1.01648	6.9202	LIN52;D10WSU102E;TTF1;2810032G03RIK;ANKRD55;PISD-PS1;SRXN1;ZFP78;GYPC;INTU
CREM-20920259	36	5776	0.318584	0.137318	0.181266	6.68486e-07	-0.463641	6.59217	HEXIM1;ZFP438;MRPS17;CBL;AKIRIN1;GPSM3;PCDHGA12;CDC42EP4;D10WSU102E;SOCS1;MIER1;ASB1;ZFP37;PISD-PS1;ZFP78;STAC2;PDE7A;AKT2;LIN52;3110082I17RIK;CENPV;NARF;TTF1;HIP1;EIF1;ID4;KIF11;MIDN;CDC42SE2;CACNB1;GTF2E2;SRXN1;ZFP612;RASIP1;RANBP9;KCTD5
STAT4-19710469	12	1939	0.106195	0.0460975	0.0600972	0.00614521	-1.27013	6.46761	HEXIM1;3110082I17RIK;ETV6;HIST2H2BE;SOCS1;LYSMD1;MIDN;GYPC;HIST1H4I;RHOQ;CAR11;HIST1H1C
STAT3-1855785	6	572	0.0530973	0.0135986	0.0394987	0.00474474	-1.19797	6.41002	EIF1;CDC42EP4;CACNB1;TRH;MIDN;ETV6
REST-18959480	16	2868	0.141593	0.0681834	0.0734095	0.00434598	-1.10526	6.01098	AKT2;TTC22;ECEL1;TRPC7;6330403K07RIK;TMIE;NTN1;ZFP2;ID4;KIF11;2810032G03RIK;ASB1;ZFP37;SRXN1;ZFP78;KCTD5
STAT3-19079543	8	948	0.0707965	0.0225376	0.0482588	0.00428608	-1.09401	5.96498	PCDHGA12;3110082I17RIK;PCSK9;CSRP2;ECEL1;SLC39A5;SRXN1;GYPC
SMAD4-19686287	5	405	0.0442478	0.00962841	0.0346194	0.00504641	-1.0968	5.80105	MTMR11;HIST2H2BE;CDC42EP4;TTF1;RGS10
RNF2-18974828	10	1300	0.0884956	0.030906	0.0575896	0.0027911	-0.867629	5.1028	SOCS1;NRGN;NTN1;ID4;RREB1;ECEL1;COL25A1;STAC2;KCTD1;RGS10
EZH2-18974828	10	1300	0.0884956	0.030906	0.0575896	0.0027911	-0.867629	5.1028	SOCS1;NRGN;NTN1;ID4;RREB1;ECEL1;COL25A1;STAC2;KCTD1;RGS10
GATA1-19941827	13	1834	0.115044	0.0436013	0.071443	0.00136637	-0.762364	5.02825	3110082I17RIK;SMYD1;TRH;EIF1;HIST2H2BE;CDC42EP4;LYSMD1;ASB1;RREB1;GYPC;INTU;PARP14;COX7A1
NR0B1-18358816	12	1691	0.106195	0.0402016	0.0659931	0.00207875	-0.811536	5.01204	HEXIM1;GZMM;TRH;GPSM3;EIF1;CDC42EP4;MLXIPL;NTN1;MIDN;RREB1;CACNB1;STAC2
HOXB4-20404135	12	1824	0.106195	0.0433635	0.0628312	0.00382143	-0.876319	4.87858	HEXIM1;NRGN;MRPS17;HIP1;HIST2H2BE;LRRC57;LYSMD1;ZFP78;HIST1H4I;RANBP9;COX7A1;RGS10
GATA1-21571218	18	2601	0.159292	0.0618358	0.0974562	0.000207544	-0.574363	4.87069	UNC119B;MRPS17;ETV6;GATM;RAB31;SOCS1;NTN1;DOK3;ASB1;RREB1;ANKRD55;GRAMD3;SERHL;GYPC;STAC2;CMPK2;LCA5;RGS10
MYC-19030024	23	3868	0.20354	0.0919573	0.111583	0.000232984	-0.558907	4.675	UNC119B;HEXIM1;ETV6;TRH;HIST2H2BE;D10WSU102E;HIST2H3C2;RPL15;PARP14;STAC2;CAR11;LIN52;3110082I17RIK;SMYD1;TTF1;RAB31;EIF1;ZFP2;KIF11;MIDN;CACNB1;GTF2E2;KCTD5
KLF4-19030024	11	1502	0.0973451	0.0357083	0.0616368	0.00251372	-0.779609	4.66674	HEXIM1;PCDHGA12;NTN1;MIDN;RPL15;CACNB1;RAB31;TRH;HIST1H4I;CAR11;HIST1H1C
FLI1-21571218	35	5834	0.309735	0.138697	0.171038	2.47666e-06	-0.341032	4.40225	HEXIM1;AKIRIN1;STK36;MIER1;MLX;ASB1;RPL15;DNAJC24;RGS10;AKT2;NRGN;NARF;UBXN2B;TTF1;RAB31;RSL24D1;TPRKB;HIP1;EIF1;MRPL49;MLXIPL;TMIE;LYSMD1;ERI2;MIDN;CDC42SE2;CACNB1;SRXN1;COL25A1;GYPC;RASIP1;RANBP9;KCTD1;KCTD5;CMPK2
TCFCP2L1-18555785	13	1987	0.115044	0.0472387	0.0678056	0.00274173	-0.70448	4.15584	ZFP438;GGNBP1;NARF;HIP1;CDC42EP4;SOCS1;TMIE;CETN2;CDC42SE2;CSRP2;RPL15;ZFP37;SRXN1
SOX2-18555785	5	497	0.0442478	0.0118156	0.0324322	0.0115091	-0.804374	3.59122	TRH;MIDN;TTF1;HIST1H1C;ETV6
TP63-19390658	3	179	0.0265487	0.00425552	0.0222932	0.0130819	-0.728711	3.16007	ZFP37;RREB1;HEXIM1
ESRRB-18555785	10	1434	0.0884956	0.0340917	0.0544039	0.00551144	-0.601791	3.12987	TMIE;ZFP438;MIER1;MIDN;CSRP2;ECEL1;SRXN1;GYPC;COX7A1;HIST1H1C
POU5F1-18347094	13	2109	0.115044	0.0501391	0.0649052	0.00451938	-0.560182	3.02464	HEXIM1;TTF1;ECEL1;SLCO2A1;TRH;NTN1;KIF11;MIDN;GRAMD3;COL25A1;CDSN;PARP14;STAC2
ELK1-19687146	7	917	0.0619469	0.0218006	0.0401463	0.0123688	-0.63088	2.77119	CBL;RREB1;CSRP2;GRAMD3;TPRKB;GNG11;HIST1H4I
MYCN-19997598	3	234	0.0265487	0.00556308	0.0209856	0.0261067	-0.686529	2.50278	S100A13;MTMR11;GPSM3
TFAP2C-20629094	9	1203	0.079646	0.0286	0.0510461	0.0053949	-0.440136	2.29852	AKT2;CDC42EP4;NTN1;S100A16;RREB1;GRAMD3;RAB31;CDSN;HIP1
SALL4-18804426_ESC	7	1065	0.0619469	0.0253192	0.0366277	0.0255344	-0.566907	2.07926	MRPS17;SRXN1;TRH;PARP14;RASIP1;RANBP9;RGS10
SOX17-20123909	12	1947	0.106195	0.0462877	0.059907	0.00634143	-0.393898	1.99338	HEXIM1;MRPS17;GPSM3;HIST2H2BE;NTN1;ID4;GRAMD3;ZFP617;RHOQ;STAC2;PDZD7;HIST1H1C
CNOT3-19339689	10	1547	0.0884956	0.0367782	0.0517174	0.00914015	-0.419445	1.96933	ZFP438;ETV6;ECEL1;TPRKB;MRPL49;MIER1;ID4;HIST2H3C2;RASIP1;KCTD5
SCL-19346495	3	252	0.0265487	0.00599101	0.0205577	0.0314526	-0.548378	1.89699	RREB1;GRAMD3;NRGN
CLOCK-20551151	4	407	0.0353982	0.00967596	0.0257223	0.0249562	-0.485626	1.79227	HEXIM1;EIF1;MIDN;HIST1H1C
TBX5-21415370	13	2296	0.115044	0.0545848	0.0604595	0.0089544	-0.369639	1.74307	AKT2;LIN52;SMYD1;GATM;TPRKB;STK36;MIER1;RREB1;ANKRD55;GRAMD3;AGBL2;CACNB1;ZFP609
E2F4-21247883	18	2998	0.159292	0.071274	0.088018	0.00109809	-0.234871	1.60046	CENPV;NRGN;TTC22;CBL;GATM;AKIRIN1;HIST2H2BE;LRRC57;SOCS1;PRC1;MIER1;KIF11;S100A13;CSRP2;TET1;DNAJC24;PDZD7;RGS10
DACH1-20351289	11	1698	0.0973451	0.040368	0.0569771	0.00623641	-0.305517	1.55122	AKIRIN1;MRPL49;HIST2H2BE;CDC42EP4;ZFP2;KIF11;S100A13;CSRP2;RPL15;KCTD5;HIST1H1C
JARID2-20075857	9	1258	0.079646	0.0299075	0.0497385	0.00713589	-0.289563	1.4312	PCDHGA12;NTN1;ODF3B;2810032G03RIK;RREB1;ECEL1;ITPRIPL2;KCTD1;RGS10
TBX3-20139965	7	1068	0.0619469	0.0253905	0.0365564	0.0258732	-0.376327	1.37531	AKT2;NTN1;GRAMD3;TRH;ZFP609;RASIP1;PDE7A
SOX2-19030024	6	863	0.0530973	0.0205168	0.0325805	0.0297913	-0.382439	1.34371	PCDHGA12;ETV6;ZFP37;RAB31;TRH;HIST1H1C
SETDB1-19884255	12	2020	0.106195	0.0480232	0.0581715	0.00837173	-0.280676	1.34245	GGNBP1;CBL;SLCO2A1;GPSM3;CDC42EP4;MLXIPL;ID4;PCSK9;SRXN1;PARP14;RASIP1;CAR11
KDM5B-21448134	22	3724	0.19469	0.0885339	0.106156	0.000357166	-0.161127	1.27891	CBL;AKIRIN1;CDC42EP4;MIER1;MLX;FAM107A;PISD-PS1;STAC2;PDE7A;LIN52;CENPV;GPRIN3;NTN1;PRC1;ERI2;KIF11;CSRP2;TET2;TET1;GTF2E2;RANBP9;KCTD1
NR1I2-20693526	6	939	0.0530973	0.0223237	0.0307737	0.0420399	-0.384271	1.21781	EIF1;SMYD1;TMIE;GPRIN3;ETV6;GYPC
ZNF263-19887448	2	71	0.0176991	0.00168794	0.0160112	0.016521	-0.284905	1.169	PCSK9;RGS10
ZFP42-18358816	9	1480	0.079646	0.0351853	0.0444607	0.0188245	-0.24884	0.988541	HEXIM1;PCDHGA12;NTN1;KIF11;S100A13;HIST2H3C2;RPL15;ECEL1;HIST1H1C
RUNX1-21571218	29	5071	0.256637	0.120557	0.13608	5.8341e-05	-0.0866705	0.844969	UNC119B;HEXIM1;MRPS17;ETV6;CDC42EP4;SOCS1;MIER1;MLX;ASB1;ANKRD55;RPL15;HIST1H4I;RGS10;NRGN;NARF;RAB31;RSL24D1;HIP1;EIF1;MRPL49;NTN1;KIF11;MIDN;FAM131C;RREB1;PRSS16;TET1;COL25A1;GYPC
SALL1-21062744	2	105	0.0176991	0.00249626	0.0152029	0.0336208	-0.223608	0.758616	PARP14;PRSS16
ZIC3-20872845	3	365	0.0265487	0.00867746	0.0178712	0.0766813	-0.27731	0.712159	SOCS1;TRH;HIST1H1C
SMAD-19615063	2	124	0.0176991	0.00294796	0.0147512	0.0451908	-0.221115	0.684764	GYPC;RANBP9
TCF3-18692474	8	1351	0.0707965	0.0321185	0.038678	0.0299794	-0.188328	0.660514	EIF1;PCDHGA12;NTN1;KIF11;ASB1;GRAMD3;TRH;PDE7A
NKX2-5-21415370	8	1507	0.0707965	0.0358272	0.0349692	0.0511597	-0.188948	0.561704	AKT2;STK36;NARF;TTC22;ZFP78;TPRKB;SERHL;RHOQ
CTNNB1-20615089	4	637	0.0353982	0.015144	0.0202543	0.0940513	-0.127544	0.301502	LIN52;MRPL49;ZFP37;NRGN
SRF-21415370	8	1634	0.0707965	0.0388465	0.03195	0.0742422	-0.0462118	0.12017	AKT2;SMYD1;ZFP438;NARF;TTF1;TPRKB;STK36;SRXN1
MYB-21317192	6	923	0.0530973	0.0219433	0.0311541	0.0392334	-0.0366537	0.118693	MIDN;DOK3;RREB1;RANBP9;STAC2;KCTD1
NANOG-16153702	8	1686	0.0707965	0.0400827	0.0307137	0.0852721	-0.0445765	0.109743	TTF1;CDC42EP4;STK36;DOK3;ASB1;GYPC;RASIP1;RGS10
GATA3-20176728	5	834	0.0442478	0.0198274	0.0244204	0.0755292	-0.0343058	0.0886199	MLXIPL;ASB1;RPL15;RAB31;RANBP9
CREB1-15753290	4	957	0.0353982	0.0227516	0.0126466	0.257307	-0.0629004	0.0853865	MRPL49;PRC1;NARF;ZFP37
FOXP3-17237761	2	257	0.0176991	0.00610988	0.0115892	0.153221	-0.0445884	0.083642	RGS10;PDE7A
SIN3B-21632747	32	4302	0.283186	0.102275	0.180911	7.03369e-08	0	0	TTC22;AKIRIN1;TRH;GPSM3;D10WSU102E;SOCS1;FAM107A;ZFP37;PISD-PS1;PARP14;STAC2;DNAJC24;HIST1H1C;CENPV;TTF1;TRPC7;TPRKB;EIF1;LYSMD1;ZFP2;ID4;KIF11;RREB1;CSRP2;TET1;GTF2E2;ITPRIPL2;INTU;RASIP1;KCTD1;KCTD5;PDZD7
SPI1-20176806	11	1654	0.0973451	0.039322	0.0580232	0.00515696	0	0	UNC119B;ETV6;ECEL1;6330403K07RIK;STK36;LYSMD1;ERI2;GRAMD3;CACNB1;PISD-PS1;RANBP9
CEBPB-20176806	10	1588	0.0884956	0.0377529	0.0507427	0.0108349	0	0	MTMR11;9930014A18RIK;ETV6;ECEL1;STK36;PCSK9;CACNB1;PISD-PS1;GTF2E2;KCTD5
FOXP3-21729870	9	1404	0.079646	0.0333785	0.0462675	0.013859	0	0	EIF1;LYSMD1;ETV6;RPL15;TPRKB;RHOQ;RANBP9;KCTD5;DNAJC24
SIN3A-21632747	7	1186	0.0619469	0.0281958	0.0337511	0.0417508	0	0	TTF1;TTC22;ASB1;CSRP2;GTF2E2;KCTD5;COX7A1
IRF8-21731497	3	319	0.0265487	0.00758386	0.0189648	0.0559335	0	0	PARP14;SOCS1;CBL
PADI4-21655091	6	1037	0.0530973	0.0246535	0.0284438	0.0619748	0	0	MTMR11;LIN52;MRPL49;HIST2H2BE;STK36;LCA5
JUN-21703547	8	1585	0.0707965	0.0376816	0.0331149	0.0646922	0	0	TTF1;RAB31;PRC1;ID4;CSRP2;RPL15;RHOQ;STAC2
SMAD4-21741376	12	2738	0.106195	0.0650928	0.0411019	0.0648105	0	0	AKT2;TTF1;ETV6;GATM;SLCO2A1;NTN1;ERMN;FAM131C;RREB1;ANKRD55;INTU;KCTD1
GATA2-21666600	4	837	0.0353982	0.0198987	0.0154995	0.189488	0	0	PCSK9;ETV6;INTU;CMPK2
PPARG-20176806	4	837	0.0353982	0.0198987	0.0154995	0.189488	0	0	CBL;S100A16;ANKRD55;ZFP37
SMAD3-21741376	6	1460	0.0530973	0.0347098	0.0183875	0.200507	0	0	AKT2;NTN1;ETV6;FAM131C;RREB1;KCTD1
TFEB-21752829	3	808	0.0265487	0.0192093	0.00733939	0.370504	0	0	LIN52;MLX;NARF
FOXP2-21765815	3	1164	0.0265487	0.0276728	-0.0011241	0.608297	0	0	HIST2H2BE;SLCO2A1;COL25A1
NANOG-18358816	7	1232	0.0619469	0.0292894	0.0326575	0.0493585	0.0133541	-0.0401779	HEXIM1;CDC42EP4;NTN1;MIER1;ZFP37;TPRKB;STAC2
THAP11-20581084	5	864	0.0442478	0.0205406	0.0237072	0.0847369	0.0309807	-0.0764667	HEXIM1;RPL15;PISD-PS1;CAR11;KCTD5
TRIM28-17542650	5	3568	0.0442478	0.0848251	-0.0405774	0.967397	2.62685	-0.0870693	ETV6;ZFP37;CAR11;ID4;CSRP2
EOMES-21245162	6	932	0.0530973	0.0221572	0.0309401	0.0407969	0.0429868	-0.137521	HEXIM1;EIF1;MRPL49;S100A16;GATM;RGS10
RCOR1-19997604	4	2378	0.0353982	0.0565342	-0.021136	0.887183	1.4293	-0.171093	9930014A18RIK;CBL;AGBL2;RANBP9
NACC1-18358816	1	769	0.00884956	0.0182821	-0.00943254	0.875678	1.79506	-0.238307	SRXN1
ERG-20887958	12	1969	0.106195	0.0468107	0.059384	0.00690685	0.050887	-0.253175	NARF;UBXN2B;ETV6;GPSM3;HIST2H2BE;MIER1;ASB1;S100A13;HIST2H3C2;SERHL;GNG11;CMPK2
STAT3-20064451	6	2202	0.0530973	0.05235	0.000747299	0.544913	0.504078	-0.30604	KIF11;RREB1;CDC42SE2;PRSS16;GYPC;PARP14
POU5F1-16153702	1	622	0.00884956	0.0147873	-0.00593779	0.814347	1.56935	-0.322294	HIST2H2BE
POU5F1-18700969	1	567	0.00884956	0.0134798	-0.00463022	0.784373	1.43592	-0.348742	HIST1H1C
POU5F1-16518401	3	1550	0.0265487	0.0368495	-0.0103008	0.79037	1.51962	-0.357498	TTF1;TRH;D10WSU102E
TCF3-18467660	7	1388	0.0619469	0.0329981	0.0289488	0.0814448	0.146756	-0.368038	CDC42EP4;CBL;SLCO2A1;TRH;RASIP1;RANBP9;RGS10
POU5F1-18555785	1	555	0.00884956	0.0131945	-0.00434494	0.777221	1.52746	-0.384965	MRPL49
NANOG-18700969	2	344	0.0176991	0.00817821	0.00952091	0.237265	0.303141	-0.436092	HIST1H1C;ASB1
STAT6-20620947	1	508	0.00884956	0.0120771	-0.00322756	0.746874	1.50128	-0.438162	SOCS1
SOX2-16153702	6	1278	0.0530973	0.030383	0.0227143	0.131176	0.217256	-0.441294	HIST2H2BE;KIF11;RPL15;HIST1H4I;RASIP1;RGS10
CUX1-19635798	7	3052	0.0619469	0.0725578	-0.0106109	0.719907	1.36233	-0.447707	SMYD1;TTF1;PRC1;ID4;KIF11;RPL15;PDE7A
TCF4-18268006	1	470	0.00884956	0.0111737	-0.00232416	0.719371	1.48258	-0.48833	ASB1
KDM6A-18722178	1	479	0.00884956	0.0113877	-0.00253812	0.726142	1.60526	-0.5137	MRPL49
SOX2-20726797	13	2564	0.115044	0.0609562	0.0540881	0.0206124	0.134034	-0.520303	NRGN;ETV6;RAB31;HIST2H2BE;CDC42EP4;LRRC57;CETN2;PCSK9;CDC42SE2;CSRP2;PARP14;RHOQ;KCTD1
NANOG-16518401	9	3520	0.079646	0.083684	-0.00403798	0.610805	1.16157	-0.572629	CDC42EP4;ZFP37;PARP14;3110082I17RIK;SMYD1;9930014A18RIK;SLCO2A1;NTN1;ZFP2
EST1-17652178	3	1001	0.0265487	0.0237976	0.00275104	0.506178	0.888719	-0.605099	HEXIM1;TPRKB;RASIP1
E2F1-18555785	21	4172	0.185841	0.0991846	0.0866562	0.00361211	0.110195	-0.619679	ZFP438;MRPS17;TRH;D10WSU102E;SOCS1;MIER1;RPL15;ZFP37;ZFP78;STAC2;HIST1H1C;3110082I17RIK;TTF1;EIF1;TMIE;PRC1;ZFP2;MIDN;S100A13;CSRP2;GTF2E2
RCOR2-21632747	1	401	0.00884956	0.00953332	-0.000683762	0.661649	1.50475	-0.621491	GGNBP1
EP300-21415370	3	1014	0.0265487	0.0241067	0.00244198	0.514815	0.940027	-0.624128	3110082I17RIK;ETV6;GRAMD3
CTNNB1-20460455	6	988	0.0530973	0.0234886	0.0296088	0.051412	0.217391	-0.64519	KIF11;ETV6;ASB1;CACNB1;RAB31;AKIRIN1
TP53-16413492	2	449	0.0176991	0.0106745	0.00702465	0.340884	0.610305	-0.656818	NARF;KCTD1
MYCN-21190229	1	373	0.00884956	0.00886765	-1.80934e-05	0.634998	1.44658	-0.656938	KIF11
GABP-17652178	3	1001	0.0265487	0.0237976	0.00275104	0.506178	0.967792	-0.658937	TTF1;ASB1;TPRKB
NR4A2-19515692	2	207	0.0176991	0.00492119	0.0127779	0.10836	0.3017	-0.670468	ZFP383;ZFP37
AR-19668381	18	3519	0.159292	0.0836602	0.0756318	0.00609096	0.139323	-0.710679	TTC22;ETV6;CDC42EP4;SOCS1;SLC25A34;ANKRD55;PARP14;PDE7A;NARF;ECEL1;RAB31;HIP1;NTN1;RREB1;CSRP2;SERHL;RANBP9;KCTD1
MEF2A-21415370	3	1048	0.0265487	0.024915	0.00163366	0.537025	1.18261	-0.735242	SOCS1;NTN1;KCTD5
HCFC1-20581084	1	306	0.00884956	0.0072748	0.00157476	0.562483	1.30432	-0.750499	KCTD5
SALL4-18804426	3	1006	0.0265487	0.0239165	0.00263217	0.509509	1.11533	-0.752072	MRPS17;RHOQ;RANBP9
HNF4A-19761587	3	1126	0.0265487	0.0267694	-0.000220697	0.585752	1.41092	-0.754644	ASB1;RREB1;SLC39A5
BMI1-19503595	4	661	0.0353982	0.0157145	0.0196837	0.10398	0.333608	-0.755141	SERHL;KCTD1;HIST1H1C;CBL
PHC1-16625203	5	922	0.0442478	0.0219195	0.0223283	0.104138	0.335639	-0.75923	PCDHGA12;9930014A18RIK;NTN1;CAR11;RGS10
ERG-21242973	1	321	0.00884956	0.00763141	0.00121815	0.579867	1.41109	-0.768982	PCSK9
ZNF274-21170338	1	327	0.00884956	0.00777405	0.0010755	0.586628	1.4518	-0.774338	ZFP2
HIF1A-21447827	1	321	0.00884956	0.00763141	0.00121815	0.579867	1.42695	-0.777625	NARF
VDR-20736230	2	230	0.0176991	0.00546799	0.0122311	0.128536	0.381774	-0.783225	UBXN2B;PDE7A
CDX2-19796622	2	334	0.0176991	0.00794047	0.00975864	0.227399	0.564004	-0.835317	AGBL2;COL25A1
SMARCA4-20176728	3	1118	0.0265487	0.0265792	-3.05063e-05	0.580904	1.55242	-0.84323	PRC1;ETV6;RAB31
SPI1-20517297	3	1249	0.0265487	0.0296936	-0.00314488	0.65575	2.00367	-0.8455	RPL15;SERHL;CMPK2
WT1-19549856	2	199	0.0176991	0.004731	0.0129681	0.10156	0.370708	-0.847846	S100A13;GPSM3
ZFP281-18358816	2	578	0.0176991	0.0137413	0.00395782	0.461571	1.10072	-0.850987	CDC42EP4;ECEL1
GFI1B-20887958	11	1871	0.0973451	0.0444809	0.0528642	0.0123079	0.194353	-0.854671	9930014A18RIK;GGNBP1;NARF;RSL24D1;SOCS1;LYSMD1;MIER1;GTF2E2;RHOQ;CMPK2;HIST1H1C
MYC-19915707	8	2979	0.0707965	0.0708223	-2.58777e-05	0.552792	1.57051	-0.930959	HIP1;MLXIPL;MIDN;GRAMD3;SRXN1;RASIP1;RANBP9;RGS10
ESR1-17901129	2	444	0.0176991	0.0105556	0.00714352	0.336008	0.85487	-0.932339	AKT2;RPL15
NANOG-18555785	2	542	0.0176991	0.0128854	0.00481368	0.429065	1.10887	-0.938268	CDC42EP4;TPRKB
GATA2-21571218	6	1111	0.0530973	0.0264128	0.0266846	0.0802057	0.376024	-0.94877	SOCS1;NTN1;NARF;RREB1;SRXN1;CMPK2
RUNX1-17652178	4	1003	0.0353982	0.0238452	0.011553	0.284549	0.789483	-0.992262	HEXIM1;ETV6;GPSM3;HIST1H1C
NRF2-20460467	3	1055	0.0265487	0.0250814	0.00146725	0.541527	1.62506	-0.996753	SRXN1;HIST1H1C;RGS10
NFE2L2-20460467	3	1055	0.0265487	0.0250814	0.00146725	0.541527	1.62506	-0.996753	SRXN1;HIST1H1C;RGS10
EWS-FLI1-20517297	2	574	0.0176991	0.0136462	0.00405292	0.458011	1.28285	-1.00173	CDC42SE2;ETV6
DNAJC2-21179169	5	899	0.0442478	0.0213727	0.0228751	0.0961964	0.432279	-1.01212	NTN1;MRPS17;GTF2E2;COL25A1;CDSN
MYC-18940864	4	746	0.0353982	0.0177353	0.0176629	0.142715	0.525727	-1.02354	RPL15;TRH;TPRKB;INTU
EP300-20729851	8	2093	0.0707965	0.0497587	0.0210378	0.201932	0.640629	-1.02489	SLCO2A1;NTN1;PRC1;MIDN;CSRP2;GYPC;KCTD1;HIST1H1C
MYC-19079543	7	1458	0.0619469	0.0346623	0.0272846	0.099041	0.455123	-1.05234	HEXIM1;PCDHGA12;D10WSU102E;NRGN;NTN1;RPL15;6330403K07RIK
ESR2-21235772	2	424	0.0176991	0.0100801	0.007619	0.316407	0.917258	-1.05551	SLCO2A1;MIDN
REST-21632747	10	2339	0.0884956	0.0556071	0.0328885	0.09918	0.457435	-1.05705	TTC22;ECEL1;TRPC7;ZFP2;ID4;2810032G03RIK;CDC42SE2;GRAMD3;PARP14;KCTD5
POU5F1-18358816	3	753	0.0265487	0.0179017	0.00864695	0.330287	0.969155	-1.07362	PCDHGA12;NTN1;HIST1H1C
AR-20517297	12	2047	0.106195	0.0486651	0.0575296	0.00924057	0.231813	-1.08585	MTMR11;GPRIN3;CBL;RAB31;TPRKB;EIF1;MLXIPL;MIER1;RREB1;SRXN1;COL25A1;HIST1H4I
MYC-20876797	7	1406	0.0619469	0.0334261	0.0285209	0.0857811	0.445254	-1.09352	PRC1;MIER1;CSRP2;GRAMD3;GATM;TRH;COL25A1
SOX2-18358816	4	785	0.0353982	0.0186625	0.0167357	0.162161	0.612893	-1.11495	EIF1;STK36;NTN1;PDZD7
MEIS1-20887958	8	1452	0.0707965	0.0345196	0.0362768	0.0428218	0.367154	-1.1568	UNC119B;D10WSU102E;NARF;ASB1;S100A13;COX7A1;GPSM3;HIST1H1C
TFAP2A-17053090	5	1904	0.0442478	0.0452654	-0.00101765	0.58408	2.16983	-1.16676	NRGN;CBL;LRRC57;CETN2;KCTD1
TRIM28-19339689	15	3072	0.132743	0.0730333	0.0597101	0.0179292	0.290305	-1.16741	ZFP438;ETV6;PCDHGA12;STAC2;CAR11;ECEL1;RAB31;TPRKB;MRPL49;TMIE;NTN1;S100A13;RREB1;RASIP1;KCTD5
CRX-20693478	3	668	0.0265487	0.0158809	0.0106677	0.268262	0.89153	-1.17307	S100A16;CDC42SE2;TRPC7
E2F1-21310950	4	1145	0.0353982	0.0272211	0.00817716	0.370586	1.18757	-1.17887	AKT2;S100A13;RANBP9;KCTD1
MYC-18555785	4	1200	0.0353982	0.0285286	0.00686959	0.403999	1.33656	-1.21138	EIF1;PRC1;MIDN;RPL15
STAT1-20625510	3	656	0.0265487	0.0155957	0.010953	0.259602	0.905511	-1.22118	RPL15;RAB31;FAM131C
LYL1-20887958	4	752	0.0353982	0.0178779	0.0175203	0.145643	0.646061	-1.2447	GTF2E2;NRGN;UBXN2B;ERMN
TP53-20018659	4	1123	0.0353982	0.026698	0.00870018	0.357184	1.23902	-1.27558	NTN1;ECEL1;PDZD7;PDE7A
TP53-18474530	3	827	0.0265487	0.019661	0.00688769	0.384318	1.34553	-1.2867	NTN1;PCSK9;ASB1
RUNX1-20887958	4	1120	0.0353982	0.0266267	0.0087715	0.355356	1.30732	-1.3526	NRGN;ERMN;FAM107A;GPSM3
KLF4-18358816	8	1700	0.0707965	0.0404156	0.0303809	0.0883993	0.592657	-1.43772	HEXIM1;EIF1;MRPL49;CSRP2;HIST2H3C2;CACNB1;PARP14;HIST1H1C
CTCF-18555785	6	1568	0.0530973	0.0372774	0.0158199	0.246994	1.03306	-1.44462	GGNBP1;CBL;ZFP2;MIDN;RHOQ;PDZD7
ERG-20517297	4	1062	0.0353982	0.0252478	0.0101504	0.320084	1.27958	-1.45767	MRPL49;CDC42EP4;TPRKB;LCA5
ELF1-17652178	1	133	0.00884956	0.00316192	0.00568763	0.302372	1.24996	-1.49507	TTF1
EWS-ERG-20517297	4	1038	0.0353982	0.0246773	0.010721	0.305568	1.28554	-1.52412	HEXIM1;UBXN2B;RPL15;SERHL
POU3F2-20337985	6	1702	0.0530973	0.0404631	0.0126342	0.308471	1.2976	-1.52614	CBL;TRPC7;GPSM3;MIER1;INTU;GYPC
ELF1-20517297	5	1020	0.0442478	0.0242493	0.0199984	0.141422	0.809216	-1.58283	SOCS1;PRSS16;CACNB1;KCTD5;RGS10
JARID2-20064375	5	1117	0.0442478	0.0265554	0.0176924	0.183252	0.953404	-1.61782	NTN1;ECEL1;ITPRIPL2;KCTD1;RGS10
PAX3-FKHR-20663909	5	1063	0.0442478	0.0252716	0.0189762	0.159411	0.885691	-1.62637	GRAMD3;FAM107A;COL25A1;INTU;HIST1H1C
E2F1-17053090	8	1726	0.0707965	0.0410337	0.0297628	0.0943841	0.698224	-1.64807	NRGN;RAB31;EIF1;LRRC57;CETN2;AGBL2;CACNB1;SRXN1
MYCN-18555785	10	2261	0.0884956	0.0537527	0.0347429	0.0837965	0.690173	-1.71119	3110082I17RIK;GGNBP1;NARF;CBL;HIP1;MRPL49;D10WSU102E;LRRC57;RANBP9;KCTD5
PHF8-20622854	5	1490	0.0442478	0.0354231	0.00882473	0.372223	1.79201	-1.77098	MIER1;NARF;RPL15;RANBP9;KCTD5
SMAD3-18955504	9	1936	0.079646	0.0460262	0.0336198	0.0776341	0.751525	-1.92071	MTMR11;CBL;EIF1;PCDHGA12;MRPL49;LRRC57;NTN1;GTF2E2;KCTD1
SMAD2-18955504	9	1936	0.079646	0.0460262	0.0336198	0.0776341	0.751525	-1.92071	MTMR11;CBL;EIF1;PCDHGA12;MRPL49;LRRC57;NTN1;GTF2E2;KCTD1
GATA2-20887958	6	1708	0.0530973	0.0406058	0.0124916	0.311295	1.69261	-1.97531	NRGN;MLXIPL;ERMN;ASB1;RREB1;ZFP609
JARID1A-20064375	11	2171	0.0973451	0.0516131	0.0457321	0.0323751	0.581361	-1.99428	LIN52;MRPS17;MRPL49;LRRC57;STK36;LYSMD1;MLX;TET2;SERHL;KCTD5;DNAJC24
ETS1-20019798	6	1607	0.0530973	0.0382046	0.0148927	0.264525	1.53966	-2.04747	AKT2;HEXIM1;TPRKB;LYSMD1;KIF11;KCTD5
ZFX-18555785	15	3249	0.132743	0.0772413	0.0555021	0.0279083	0.58832	-2.1055	ZFP438;HIST2H2BE;RPL15;GNG11;HIST1H1C;RAB31;TPRKB;EIF1;ZFP2;S100A16;CDC42SE2;SRXN1;ZFP612;KCTD5;COX7A1
TCFAP2C-20176728	9	2667	0.079646	0.0634049	0.0162411	0.289382	1.74595	-2.16499	MRPS17;RAB31;SLCO2A1;HIP1;MIDN;S100A13;COL25A1;PARP14;RGS10
LMO2-20887958	8	1741	0.0707965	0.0413903	0.0294062	0.0979412	0.938011	-2.17936	NRGN;ERMN;TET2;PRSS16;GTF2E2;ZFP609;KCTD1;HIST1H1C
RAD21-21589869	9	2036	0.079646	0.0484036	0.0312424	0.0983005	1.12454	-2.60862	3110082I17RIK;GGNBP1;HIP1;PCDHGA12;TMIE;MIDN;RREB1;ZFP78;COX7A1
SOX2-21211035	15	3420	0.132743	0.0813066	0.0514368	0.0410349	0.84445	-2.69661	ETV6;CDC42EP4;PCSK9;ASB1;GNG11;PDE7A;NRGN;GPRIN3;ECEL1;NTN1;RREB1;COL25A1;GYPC;INTU;PDZD7
MITF-21258399	30	5578	0.265487	0.132611	0.132876	0.000128765	0.326201	-2.92195	HEXIM1;MRPS17;ETV6;TRH;GPSM3;HIST2H2BE;SOCS1;MLX;RGS10;PDE7A;LIN52;ISPD;GGNBP1;NARF;GPRIN3;HIP1;EIF1;NTN1;MIDN;DOK3;FAM131C;S100A13;RREB1;CSRP2;TET1;PRSS16;COL25A1;GYPC;RHOQ;KCTD5
SFPI1-20887958	12	2369	0.106195	0.0563203	0.0498744	0.0259434	0.803974	-2.93599	HEXIM1;NARF;TTF1;RSL24D1;TPRKB;GPSM3;EIF1;D10WSU102E;HIST2H3C2;GTF2E2;SERHL;ZFP617
EGR1-19374776	1	68	0.00884956	0.00161662	0.00723293	0.169117	1.69694	-3.01575	CBL
TAL1-20887958	9	2067	0.079646	0.0491406	0.0305054	0.105304	1.37388	-3.09247	HEXIM1;ETV6;GPSM3;EIF1;D10WSU102E;MIDN;ASB1;HIST1H4I;HIST1H1C
CREB1-20920259	15	3057	0.132743	0.0726767	0.0600667	0.0172315	0.803871	-3.26453	HEXIM1;3110082I17RIK;ZFP438;MRPS17;CBL;AKIRIN1;EIF1;CDC42EP4;KIF11;MIDN;ASB1;PISD-PS1;GTF2E2;ZFP617;STAC2
PPARG-20887899	18	3565	0.159292	0.0847538	0.0745382	0.00693858	0.696183	-3.46049	UNC119B;HEXIM1;ZFP438;ETV6;CDC42EP4;SOCS1;STK36;DNAJC24;LIN52;CENPV;NARF;RAB31;MLXIPL;ID4;MIDN;RREB1;SRXN1;ZFP612
GABP-19822575	11	2639	0.0973451	0.0627392	0.0346059	0.0984919	1.53699	-3.56241	HEXIM1;UBXN2B;TPRKB;EIF1;CDC42EP4;SOCS1;KIF11;MIDN;ASB1;S100A13;KCTD5
PPARD-21283829	12	3447	0.106195	0.0819485	0.0242462	0.215646	3.04523	-4.67175	ETV6;TRH;ASB1;GRAMD3;RPL15;HIST1H1C;RGS10;ID4;KIF11;AGBL2;GTF2E2;INTU

## Sheet: SuppData3 E2K orange.results_ki
Kinase	Substrates in Input	Substrates in Database	Input Fraction	Database Fraction	Difference	P-value	Z-score	Combined Score	Substrates
MAPK1	10	312	0.3125	0.0688286	0.243671	4.21808e-05	-2.2592	22.7582	MED1;RUNX1;AR;GATA4;GATA2;VAV1;EP300;SP1;TCF3;MAPK1
MAPK3	9	251	0.28125	0.0553717	0.225878	4.83545e-05	-2.22385	22.0982	MED1;RUNX1;AR;GATA4;TAL1;SP1;TCF3;KDM5A;MAPK3
MAP2K1	4	39	0.125	0.00860357	0.116396	0.000202696	-2.01241	17.1131	MAPK1;EP300;MAPK3;TAL1
HIPK2	4	43	0.125	0.00948599	0.115514	0.000287251	-1.73936	14.1847	EP300;UBE2I;RUNX1;KAT2B
AKT1	7	256	0.21875	0.0564747	0.162275	0.00188475	-2.15682	13.5318	AR;GATA2;EZH2;TAL1;YAP1;EP300;DNMT1
RPS6KA2	3	21	0.09375	0.00463269	0.0891173	0.000573172	-1.75407	13.093	SRF;MAPK1;MAPK3
CDK2	11	606	0.34375	0.133686	0.210064	0.00219404	-1.98526	12.1538	MED1;EZH2;SIN3A;SKP2;RUNX1;ID2;ID3;EP300;TCF3;KDM5A;HIST1H1A
MAPK14	9	461	0.28125	0.101699	0.179551	0.00387547	-2.00588	11.1388	MED1;AR;EZH2;SIN3A;RUNX1;ID2;TCF3;KDM5A;MAPK1
CDK1	10	567	0.3125	0.125083	0.187417	0.00459947	-1.79039	9.63554	MED1;AR;EZH2;SETD8;TAL1;DNMT1;RUNX1;ID2;KDM5A;HIST1H1A
CDK9	3	38	0.09375	0.00838297	0.085367	0.00278423	-1.41094	8.30164	SKP2;HIST1H1A;AR
PRKACA	7	395	0.21875	0.0871388	0.131611	0.0189311	-1.39606	5.53812	GATA4;TAL1;HAND2;SRF;YAP1;EP300;HIST1H1A
RPS6KA1	3	75	0.09375	0.0165453	0.0772047	0.016676	-1.1736	4.80445	SRF;MAPK1;MAPK3
RPS6KA4	2	10	0.0625	0.00220604	0.060294	0.00300764	-0.791058	4.59336	MAPK1;MAPK3
RAF1	3	84	0.09375	0.0185308	0.0752192	0.0222688	-1.04298	3.96808	VAV1;AR;MAPK1
CSNK1D	3	85	0.09375	0.0187514	0.0749986	0.0229464	-1.02865	3.88275	YAP1;DNMT1;SRF
KSR2	2	5	0.0625	0.00110302	0.061397	0.000978168	-0.49944	3.46103	MAPK1;MAPK3
ATM	4	177	0.125	0.039047	0.085953	0.0361318	-1.01693	3.37678	EP300;MED1;SP1;SRF
JAK2	3	92	0.09375	0.0202956	0.0734544	0.0280051	-0.925102	3.30758	VAV1;MAPK1;MAPK3
CSNK2A2	5	267	0.15625	0.0589014	0.0973486	0.0388215	-0.937734	3.04649	SP1;SIN3A;HDAC2;HDAC1;MAPK3
PRKCZ	3	104	0.09375	0.0229429	0.0708071	0.0379573	-0.78392	2.56443	SP1;MAPK1;MAPK3
DAPK1	2	21	0.0625	0.00463269	0.0578673	0.0109886	-0.558984	2.52152	MAPK1;MAPK3
MKNK1	2	13	0.0625	0.00286786	0.0596321	0.0047225	-0.46661	2.49889	MAPK1;MAPK3
GSK3B	8	600	0.25	0.132363	0.117637	0.0538002	-0.801659	2.34283	AR;TAL1;DNMT1;SIN3A;RUNX1;ID2;TCF3;KDM5A
CDK6	2	25	0.0625	0.00551511	0.0569849	0.0149818	-0.524097	2.20169	RUNX1;AR
NLK	2	14	0.0625	0.00308846	0.0594115	0.00537361	-0.370568	1.93669	TCF4;SKP2
RPS6KA5	2	37	0.0625	0.00816236	0.0543376	0.0300235	-0.51367	1.80081	SRF;EP300
DMPK	2	15	0.0625	0.00330907	0.0591909	0.00606354	-0.337483	1.72301	SRF;SP1
RET	2	40	0.0625	0.00882418	0.0536758	0.0344359	-0.448716	1.51157	MAPK1;MAPK3
CSNK2A1	7	521	0.21875	0.114935	0.103815	0.0687034	-0.455048	1.2186	SP1;HDAC2;HDAC1;SRF;SUZ12;TCF4;MAPK1
MAPKAPK2	2	40	0.0625	0.00882418	0.0536758	0.0344359	-0.312312	1.05207	SRF;TCF3
MAP2K2	2	15	0.0625	0.00330907	0.0591909	0.00606354	-0.109062	0.556811	MAPK1;MAPK3
PRKCD	3	146	0.09375	0.0322083	0.0615417	0.0849132	-0.131791	0.325014	EP300;MAPK1;MAPK3
MAP3K8	2	54	0.0625	0.0119126	0.0505874	0.0579864	-0.0753221	0.214483	MAPK1;MAPK3
CSNK1E	3	148	0.09375	0.0326495	0.0611005	0.0875845	-0.0520078	0.126647	DNMT1;HDAC2;HDAC1
ABL1	3	151	0.09375	0.0333113	0.0604387	0.0916593	0.0478502	-0.114347	EP300;VAV1;YAP1
RPS6KA3	5	365	0.15625	0.0805206	0.0757294	0.112377	0.139183	-0.30424	AR;TAL1;SRF;MAPK1;MAPK3
LCK	3	161	0.09375	0.0355173	0.0582327	0.10581	0.165393	-0.371491	VAV1;MAPK1;MAPK3
FYN	1	216	0.03125	0.0476506	-0.0164006	0.790688	2.64624	-0.621475	VAV1
INSR	1	175	0.03125	0.0386058	-0.00735578	0.717061	2.49006	-0.828181	VAV1
MAPK8	4	275	0.125	0.0606662	0.0643338	0.128344	0.418409	-0.859012	AR;SP1;MAPK1;MAPK3
PRKCE	2	70	0.0625	0.0154423	0.0470577	0.0898707	0.366048	-0.881949	MAPK1;MAPK3
MAP3K14	1	145	0.03125	0.0319876	-0.000737646	0.647875	2.56697	-1.11421	MAPK3
IGF1R	1	144	0.03125	0.031767	-0.000517042	0.645307	2.5796	-1.12994	VAV1
ERBB2	1	125	0.03125	0.0275756	0.00367444	0.592925	2.61026	-1.36435	VAV1
PRKG1	1	114	0.03125	0.0251489	0.00610109	0.559252	2.44636	-1.42171	SRF
SYK	2	85	0.0625	0.0187514	0.0437486	0.123411	0.708178	-1.48168	VAV1;MAPK3
PRKDC	2	227	0.0625	0.0500772	0.0124228	0.482433	2.10691	-1.53575	SP1;SRF
CAMK2A	1	105	0.03125	0.0231635	0.00808653	0.529709	2.47133	-1.57036	SRF
EGFR	3	247	0.09375	0.0544893	0.0392607	0.254432	1.23727	-1.69347	AR;VAV1;MAPK1
TRIM24	1	95	0.03125	0.0209574	0.0102926	0.494632	2.53362	-1.78352	AR
SRC	3	346	0.09375	0.0763291	0.0174209	0.447298	2.22248	-1.78806	AR;VAV1;SRF
PRKCA	5	487	0.15625	0.107434	0.0488156	0.25819	1.34811	-1.82542	AR;HAND2;SRF;EP300;HIST1H1A
MTOR	1	86	0.03125	0.018972	0.012278	0.460906	2.64428	-2.04816	DNMT1
MAP3K1	2	139	0.0625	0.030664	0.031836	0.259815	1.54861	-2.0872	UBE2I;MAPK1
MAPK9	2	162	0.0625	0.0357379	0.0267621	0.320209	1.83613	-2.09095	DNMT1;ID3
HCK	1	77	0.03125	0.0169865	0.0142635	0.425004	2.60033	-2.22499	VAV1
SGK1	1	76	0.03125	0.0167659	0.0144841	0.420874	2.57903	-2.23195	MAPK1
PTK2B	1	70	0.03125	0.0154423	0.0158077	0.395489	2.46997	-2.29123	VAV1
ERBB3	1	61	0.03125	0.0134569	0.0177931	0.355379	2.5895	-2.67902	VAV1
ATR	1	63	0.03125	0.0138981	0.0173519	0.364509	2.73475	-2.75992	SP1
BTK	1	59	0.03125	0.0130157	0.0182343	0.346122	2.69456	-2.85884	VAV1
BCR	1	48	0.03125	0.010589	0.020661	0.292858	2.36888	-2.90914	VAV1
ADRBK1	1	56	0.03125	0.0123538	0.0188962	0.331994	2.68223	-2.95753	MAPK3
ZAP70	1	51	0.03125	0.0112508	0.0199992	0.307788	2.62296	-3.09075	VAV1
AURKA	1	51	0.03125	0.0112508	0.0199992	0.307788	2.77873	-3.27431	AR
RIPK2	1	48	0.03125	0.010589	0.020661	0.292858	2.69732	-3.31248	UBE2I
PRKCQ	1	45	0.03125	0.0099272	0.0213228	0.277617	2.61052	-3.34541	VAV1
CDK4	1	51	0.03125	0.0112508	0.0199992	0.307788	2.85366	-3.3626	TCF3
NTRK1	1	39	0.03125	0.00860357	0.0226464	0.246175	2.4689	-3.46069	MAPK3
RPS6KB1	1	48	0.03125	0.010589	0.020661	0.292858	2.86185	-3.51454	MAPK1
PRKAA1	1	41	0.03125	0.00904478	0.0222052	0.2568	2.71245	-3.68746	EP300
MET	1	38	0.03125	0.00838297	0.022867	0.240807	2.5968	-3.69721	VAV1
ERBB4	1	41	0.03125	0.00904478	0.0222052	0.2568	2.80082	-3.80759	YAP1
CHEK2	1	41	0.03125	0.00904478	0.0222052	0.2568	2.84829	-3.87213	HIST1H1C
CASK	1	42	0.03125	0.00926539	0.0219846	0.262058	2.93197	-3.92646	ID1
YES1	1	36	0.03125	0.00794176	0.0233082	0.229961	3.11637	-4.58059	YAP1
TYK2	1	30	0.03125	0.00661813	0.0246319	0.196512	2.86301	-4.65821	VAV1
MAP4K1	1	25	0.03125	0.00551511	0.0257349	0.167567	2.85235	-5.09535	MAPK1
TEC	1	25	0.03125	0.00551511	0.0257349	0.167567	2.91232	-5.20249	VAV1
TNK2	1	27	0.03125	0.00595632	0.0252937	0.179264	3.09146	-5.31389	AR
CDK7	1	31	0.03125	0.00683874	0.0244113	0.202183	3.35894	-5.36954	AR
HIPK3	1	26	0.03125	0.00573572	0.0255143	0.173436	3.33464	-5.84211	AR
CAMK4	1	25	0.03125	0.00551511	0.0257349	0.167567	3.29535	-5.88673	EP300
CAMK1	1	24	0.03125	0.00529451	0.0259555	0.161658	3.23795	-5.90043	EP300
PIM1	1	27	0.03125	0.00595632	0.0252937	0.179264	3.562	-6.12271	SKP2
MAP2K3	1	20	0.03125	0.00441209	0.0268379	0.137613	3.16598	-6.27913	MAPK3
NTRK3	1	19	0.03125	0.00419148	0.0270585	0.131498	3.27205	-6.63822	MAPK1
BRAF	1	21	0.03125	0.00463269	0.0266173	0.143686	3.48889	-6.76888	MAPK1
MAP3K2	1	18	0.03125	0.00397088	0.0272791	0.125341	3.33255	-6.92076	MAPK1
MAPKAPK5	1	20	0.03125	0.00441209	0.0268379	0.137613	3.88918	-7.71346	MAPK1
MAP3K10	1	21	0.03125	0.00463269	0.0266173	0.143686	4.06147	-7.87975	TCF3
PLK3	1	18	0.03125	0.00397088	0.0272791	0.125341	3.80749	-7.90707	MAPK1
MYLK	1	16	0.03125	0.00352967	0.0277203	0.1129	3.82039	-8.33322	MAPK3
WEE1	1	18	0.03125	0.00397088	0.0272791	0.125341	4.04309	-8.39635	SKP2
DYRK1B	1	15	0.03125	0.00330907	0.0279409	0.106616	4.14624	-9.28145	MAPK1
NEK2	1	11	0.03125	0.00242665	0.0288234	0.0810437	3.77362	-9.48222	MAPK1
BUB1B	1	14	0.03125	0.00308846	0.0281615	0.100288	4.22043	-9.70576	HDAC1
MKNK2	1	9	0.03125	0.00198544	0.0292646	0.0679931	3.74127	-10.0578	MAPK1
BUB1	1	14	0.03125	0.00308846	0.0281615	0.100288	4.41899	-10.1624	HDAC1
MAPKAPK3	1	9	0.03125	0.00198544	0.0292646	0.0679931	4.1875	-11.2575	TCF3
STK3	1	10	0.03125	0.00220604	0.029044	0.0745407	4.34225	-11.2743	YAP1
TLK1	1	10	0.03125	0.00220604	0.029044	0.0745407	4.65461	-12.0853	HIST1H1A
HSPB8	1	12	0.03125	0.00264725	0.0286027	0.0875025	5.30095	-12.9136	MAPK3
HIPK1	1	8	0.03125	0.00176484	0.0294852	0.0614007	4.85781	-13.5549	RUNX1
GAK	1	11	0.03125	0.00242665	0.0288234	0.0810437	5.55563	-13.96	AR
KSR1	1	8	0.03125	0.00176484	0.0294852	0.0614007	5.1727	-14.4336	MAPK1
LATS1	1	7	0.03125	0.00154423	0.0297058	0.0547631	5.26726	-15.3	YAP1
MERTK	1	7	0.03125	0.00154423	0.0297058	0.0547631	5.44414	-15.8138	VAV1
BRD2	1	7	0.03125	0.00154423	0.0297058	0.0547631	6.09258	-17.6973	KDM5A
LATS2	1	5	0.03125	0.00110302	0.030147	0.0413512	5.69121	-18.1302	YAP1
CAMK1D	1	4	0.03125	0.000882418	0.0303676	0.0345763	5.44601	-18.3236	EP300
PAK6	1	3	0.03125	0.000661813	0.0305882	0.027755	5.55996	-19.9288	AR
CAMK1G	1	3	0.03125	0.000661813	0.0305882	0.027755	6.74091	-24.1617	EP300
NEK3	1	5	0.03125	0.00110302	0.030147	0.0413512	8.72687	-27.8008	VAV1
RNASEL	1	3	0.03125	0.000661813	0.0305882	0.027755	8.57056	-30.7198	AR

## Sheet: SuppData3 E2K magenta.results_t
TF	Target/Input	Targets/Database	Fraction/Input	Fraction/Database	Difference	P-value	Z-score	Combined Score	Genes
SUZ12-16625203	37	1270	0.106017	0.0301928	0.0758244	8.77583e-11	-1.91614	44.3709	GRIN2C;WNT7A;SLC16A2;KCNH1;SMO;GRIA2;SLCO1C1;SLITRK3;HTR5B;ST8SIA4;ARSB;PCSK1;SLC7A10;GPC5;LOXL3;CACNA1E;GRM3;SERPINE2;BCAN;ADCY9;CHST11;BACE2;H2-K1;ABHD3;ITPR2;ADAMTS1;TRPC6;SEMA3D;SEMA3A;ANGPT1;ANTXR1;COL8A2;RYR2;MATN4;PTGER3;GDF10;TGFB2
HOXB4-20404135	46	1824	0.131805	0.0433635	0.0884416	4.22801e-11	-1.71764	41.0287	MPPE1;PLSCR2;NRD1;FADS1;CWF19L2;POLA2;CALU;SREBF2;MFGE8;MRPS30;YARS2;TTC19;2700060E02RIK;MTDH;WDR45;GSS;NUCB1;4833420G17RIK;THNSL1;COPS5;VPS45;BLZF1;SCFD1;LMLN;KBTBD3;PHYH;COQ7;PSMB6;SLC16A1;AKR1E1;ARL6;ARL2;HAX1;LRP4;PRCP;HSD17B12;NDUFA9;DHODH;OSGEP;MAD2L2;BLVRA;MED6;LSG1;CHEK2;CRYZL1;ATP6V1H
PPARG-20887899	82	3565	0.234957	0.0847538	0.150203	3.26447e-17	-1.04427	39.6415	ORAI1;PLSCR2;FADS2;FADS1;SMO;KCNE2;RAP1A;LY86;ETFA;NOP56;HIBADH;PITPNM1;TMEM176A;NNMT;2700060E02RIK;ADCY9;MTDH;WDR45;ANGPTL2;COPB1;COL1A2;F3;SLC29A4;SLC16A1;ARL2;LRP5;HSD17B12;HSD17B10;DHODH;MMADHC;SNX7;ARSB;FKBP10;SLC7A10;RCN1;NAA20;SOD3;SLC2A13;FAM180A;PACRG;SLC20A2;TMEM143;ILVBL;ATP6V1H;EPHX1;PON2;FAT3;HPRT;CCDC80;OSGIN2;CALU;PNPLA6;YARS2;LOXL1;NGLY1;PHB2;TCN2;GRAMD1A;NBAS;FCGRT;EIF2B5;ANGPT1;…
SUZ12-20075857	97	4356	0.277937	0.103559	0.174378	1.32631e-19	-0.896389	38.9631	BTBD17;KCNH1;SMO;GRIA2;HTR5B;APOO;PCLO;BBS7;PITPNM1;YIF1A;YIF1B;CACHD1;HTRA1;GRM3;BCAN;ADCY9;ADCY3;MATN4;COPB1;AAAS;GRIN2C;F3;SLC29A4;SLC16A2;LAG3;ADCYAP1;DSP;LRP4;PTPRZ1;SLITRK3;MDGA1;HFE2;SNX7;ARSB;COL9A3;FKBP10;PCSK6;SLC7A10;SOD3;DNASE2A;SLC2A13;SLC2A12;H2-K1;ABHD3;VTN;ACSL6;COL8A2;LTBP1;TGFB2;TGFBI;PON2;AI464131;WNT7A;ELFN2;ITGA8;ZFP354B;AKAP11;LOXL3;LOXL1;CACNA1E;P4HA2;CSPG4;ADAMTS1;TRPC6;TO…
E2F1-18555785	87	4172	0.249284	0.0991846	0.150099	8.76955e-16	-1.09261	37.8808	MPPE1;PRPSAP2;UROD;SMO;PKMYT1;ETFB;VPS13A;APOE;MRPS30;YIF1A;PRDM5;TIMM50;2700060E02RIK;WDR45;9130401M01RIK;VPS45;CRNKL1;SCFD1;PARP2;DARS;IQCC;SND1;MCTS1;SLC16A1;ERO1L;MRPL2;HSD17B12;HSD17B10;CNNM3;DHODH;NSMCE1;MAD2L2;SEC61A2;RCN1;DNASE2A;LSG1;CYP4F13;CHEK2;ATP6V0C;SLC20A2;TMEM143;EPHX1;PLA2G7;SLC27A3;ITGA5;NUDT2;SNRPD1;CALU;SREBF1;PNPLA6;NGLY1;GSS;THNSL1;PLXNB1;RFC3;POLR3H;MAGOH;BLZF1;CD320;KBTBD…
NRF2-20460467	34	1055	0.0974212	0.0250814	0.0723398	4.16573e-11	-1.57817	37.7207	COL1A2;SNX13;F3;AKR1E1;GRIA2;VPS13A;ITGA8;MMADHC;ST8SIA4;PCDH20;PCLO;PITPNM1;GPC5;CACHD1;SLC30A1;CACNA1E;INHBB;MTDH;CHST11;FDFT1;ANXA1;AGA;ITPR2;ESD;ANGPT1;IFIT3;SLC20A2;TGFB2;EPHX1;COQ7;ATP5G3;HAPLN1;DTWD1;TFPI
NFE2L2-20460467	34	1055	0.0974212	0.0250814	0.0723398	4.16573e-11	-1.57817	37.7207	COL1A2;SNX13;F3;AKR1E1;GRIA2;VPS13A;ITGA8;MMADHC;ST8SIA4;PCDH20;PCLO;PITPNM1;GPC5;CACHD1;SLC30A1;CACNA1E;INHBB;MTDH;CHST11;FDFT1;ANXA1;AGA;ITPR2;ESD;ANGPT1;IFIT3;SLC20A2;TGFB2;EPHX1;COQ7;ATP5G3;HAPLN1;DTWD1;TFPI
MTF2-20144788	68	2981	0.194842	0.0708699	0.123973	4.47329e-14	-1.05564	32.4484	AI464131;WNT7A;SLC27A1;KCNH1;SMO;GRIA2;ELFN2;VPS13A;HTR5B;ZFP354B;PITPNM1;YIF1A;YIF1B;CACHD1;LOXL3;LOXL1;HTRA1;CACNA1E;GRM3;BCAN;ADCY9;ADCY3;ILF2;P4HA2;ADAMTS1;TRPC6;MATN4;PTGER3;LSAMP;HRH1;THBS4;AAAS;GRIN2C;SLC16A2;DSP;PTPRZ1;SLITRK3;CNNM3;MDGA1;ST8SIA4;SNX7;ARSB;COL9A3;SLC7A10;GPC5;MAD2L2;SCARA3;INHBB;SERPINE2;RXFP3;GPLD1;CHST11;ACE;SLC2A13;BACE2;H2-K1;ABHD3;ITPR2;VTN;SEMA3D;ANTXR1;COL8A2;RYR2;…
HNF4A-19822575	117	6083	0.335244	0.144616	0.190627	4.9836e-19	-0.691319	29.1342	MPPE1;PRPSAP2;SNX13;SMO;PKMYT1;RAP1A;ETFA;ETFB;VPS13A;CWF19L2;APOO;HIBADH;MRPS30;YIF1A;PRDM5;ENPP2;NNMT;GRM3;TTC17;ADCY9;WDR45;OLFML3;MCM8;LBP;TTR;VPS45;AQP4;IFIT3;SCFD1;PARP2;COQ7;SND1;AAAS;GRIN2C;SLC29A4;ERO1L;LAG3;DSP;NSMCE4A;LRP5;LRP4;CNNM3;DHODH;NSMCE1;HFE2;OSGEP;ARSB;COL9A3;CCDC126;PCSK6;SLC7A10;ATP2A2;SEC61A2;RCN1;BLVRA;LAMB2;VIT;IFT88;SLC2A13;LSG1;CSF1R;ESD;CHEK2;ACSL6;PACRG;SLC20A2;TMEM1…
TBX5-21415370	49	2296	0.140401	0.0545848	0.0858164	2.27168e-09	-1.45838	29.0259	PRPSAP2;SLC27A1;FBXO10;ARPC3;ETFB;SNRPD1;GGNBP2;POLA2;YIF1A;TTC3;PRDM5;YARS2;TIMM50;TTC19;GRAMD1A;EIF2B5;TMEM132A;PLXNB1;PARP2;PHYH;THBS4;MRPL17;MRPL15;CTBS;F3;ANAPC4;GTF3C6;LRP5;PAQR6;NSMCE1;CCDC126;CTSH;CTSD;ACAD8;1500015O10RIK;LAMB2;IFT88;TM9SF1;H2-K1;2410002F23RIK;CHEK2;CRYZL1;RYR2;PACRG;ATP6V0C;TGFBI;DTWD1;CYP4V3;PON2
KDM5B-21448134	80	3724	0.229226	0.0885339	0.140692	3.66606e-15	-0.84237	28.0001	PRPSAP2;BTBD17;FADS2;CACHD1;PRDM5;UBA3;TTC19;2700060E02RIK;VPS35;MTDH;FDFT1;4833420G17RIK;COPS5;MCM8;MFAP2;CRNKL1;SCFD1;PARP2;COPB2;COPB1;DARS;SND1;GLRA3;ARL6;DSP;MMADHC;SLC7A10;UTP20;CHD8;ATP2A2;SEC61A2;SEC61A1;NAA20;LSG1;ESD;CHEK2;SLC20A2;PLA2G7;FAT1;FAT3;MED23;AI464131;SLC27A1;NRD1;FUZ;ZFP354B;EIF3E;SNRPD1;EIF2A;GGNBP2;AIMP1;CALU;SREBF2;TTC3;YARS2;CACNA1E;TMEM209;ILF2;EIF2B5;P4HA2;RFC3;LMLN;PP…
MITF-21258399	109	5578	0.312321	0.132611	0.17971	4.61992e-18	-0.674287	26.915	ORAI1;SNX13;PLSCR1;FADS2;UROD;FADS1;KCNH1;FBXO10;ETFA;APOO;HIBADH;YIF1B;CACHD1;HTRA1;TIMM50;VPS35;BCAN;ADCY9;MTDH;IFIT3;MATN4;COQ7;SND1;AAAS;GRIN2C;SLC16A1;ERO1L;LAG3;ARL6;ARL2;MRPL2;LRP5;LRP4;MDGA1;ARSB;COL9A3;CCDC126;PCSK6;UTP20;LGALS3BP;EDA;SEC61A2;SEC61A1;BLVRA;IFT88;SLC2A12;LSG1;ESD;KCNJ16;CHEK2;ACSL6;PACRG;RAB33A;ATP6V0C;SLC20A2;CIB1;TMEM143;ILVBL;ATP6V1H;TGFB2;TGFBI;FAT1;FAT3;SLC27A1;SLC27…
SUZ12-18974828	45	1932	0.12894	0.0459311	0.0830087	8.22164e-10	-1.27455	26.6625	MPPE1;WNT7A;SMO;SLC27A3;GRIA2;HTR5B;OSGIN2;CACHD1;LOXL1;HTRA1;CACNA1E;GRM3;BCAN;ADCY3;ADAMTS1;TRPC6;MATN4;PTGER3;GRIN2C;SLC16A2;LRP4;SLITRK3;MDGA1;ST8SIA4;ARSB;PCSK1;GPC5;SCARA3;INHBB;SERPINE2;RXFP3;CHST11;ACE;SLC2A13;BACE2;ITPR2;SEMA3D;ANTXR1;RYR2;GDF10;LTBP1;TGFB2;NR4A3;CYP4V3;PON2
ZFX-18555785	65	3249	0.186246	0.0772413	0.109005	4.98141e-11	-1.1076	26.2754	MPPE1;SNX13;SMO;HIBADH;BBS7;MRPS30;PRDM5;VPS35;MTDH;COPB1;DARS;ERO1L;ARL2;LRP5;HSD17B12;CNNM3;ACAD8;ATP2A2;SEC61A2;RCN1;BLVRA;LAMB2;IFT88;ESD;CIB1;LTBP1;SLC27A3;ITGA5;NUDT2;SNRPD1;GGNBP2;SREBF1;TTC8;YARS2;NGLY1;PHB2;ADPRH;GRAMD1A;THNSL1;ILF2;EIF2B5;PLXNB1;POLR3H;CD320;TOP2B;LMLN;PSMD1;MRPL17;CTBS;MRPL44;PSMA3;PSMA2;HAT1;ANAPC4;AKR1B3;SLC30A1;NDUFV2;INHBB;SERPINH1;AGA;SLC11A2;CRYZL1;RSL1D1;APLP1;P…
GATA4-21415370	43	2039	0.123209	0.0484749	0.0747343	3.37489e-08	-1.49439	25.71	PRPSAP2;MED23;PLSCR2;UROD;ETFB;TMEM176A;YIF1B;YARS2;2700060E02RIK;MTDH;GRAMD1A;GSS;NUCB1;SCRG1;ADAMTS1;RFC3;MAGOH;TOP2B;LMLN;DARS;F3;MRPL44;PSMC2;NDUFA9;NSMCE1;ATP5S;ACAD8;SCARA3;ATP2A2;SEC61A1;RCN1;SEMA3A;CHEK2;RSL1D1;TMEM143;ILVBL;LTBP1;ATP6V1H;TGFB2;SGSH;DTWD1;USP30;PON2
SUZ12-18555785	29	1058	0.0830946	0.0251527	0.0579418	3.80882e-08	-1.50205	25.6601	GRIN2C;WNT7A;SLC16A2;SMO;SLITRK3;MDGA1;ARSB;COL9A3;SLC7A10;PITPNM1;GPC5;CACHD1;LOXL1;HTRA1;CACNA1E;GRM3;SERPINE2;RXFP3;BCAN;ADCY9;SLC2A13;TRPC6;ANTXR1;RYR2;PTGER3;GDF10;HRH1;TGFB2;NR4A3
RCOR1-19997604	42	2378	0.120344	0.0565342	0.0638096	4.57278e-06	-2.02234	24.8655	PRPSAP2;SNX13;SLC39A12;PLSCR1;VPS13A;GGNBP2;HIBADH;PCLO;TTC3;CACHD1;HTRA1;VCAM1;NGLY1;ADPRH;CFH;WDR45;MCM8;ANGPT1;LMLN;KBTBD3;HEPH;LUM;MRPL17;MYOC;PSMA2;SLC29A4;GLRA3;SLC16A1;PSMC2;ARL6;CNNM3;ST8SIA4;GPC5;BLVRA;LSG1;AGA;ESD;KCNJ16;RAB33A;GDF10;DTWD1;PON2
CUX1-19635798	50	3052	0.143266	0.0725578	0.0707086	4.15725e-06	-1.97265	24.4424	PRPSAP2;SNX13;PLSCR2;FADS2;UROD;SMO;RAP1A;LY86;NUDT2;POLA2;SELPLG;MRPS30;TTC3;LOXL3;NNMT;CACNA1E;FDFT1;ADCY3;ILF2;EIF2B5;COPS5;ANGPT1;AQP4;BLZF1;COPB2;ATP5G3;SND1;GLRA3;SLC16A1;HAT1;ANAPC4;ARL6;PRCP;SLC7A10;PTPRF;GPC4;ATP2A2;RCN1;NUP37;AGA;AGT;CSF1R;ESD;SEMA3A;KCNJ16;COL8A2;ATR;CIB1;LTBP1;EGFL6
POU3F2-20337985	38	1702	0.108883	0.0404631	0.0684194	5.55735e-08	-1.18532	19.8014	PLSCR2;GRIA2;ITGA8;BBS7;MRPS30;ENPP2;GABRG1;CFH;ADAMTS1;TRPC6;ANGPT1;VPS45;CRNKL1;BLZF1;PTGER3;LSAMP;THBS4;LUM;COL1A2;CTBS;PSMA2;GLRA3;SLITRK3;ST8SIA4;ARSB;PCSK1;GPC5;ATP2A2;SEC61A1;ANXA1;SLC2A12;BACE2;ABHD3;SEMA3D;SEMA3A;NKIRAS1;PACRG;TFPI
SUZ12-18692474	41	1909	0.117479	0.0453843	0.0720942	4.48152e-08	-1.16647	19.7376	WNT7A;GRIA2;ITGA8;HTR5B;CACHD1;HTRA1;CACNA1E;GRM3;BCAN;ADAMTS1;TRPC6;MATN4;PTGER3;GRIN2C;PTPRZ1;SLITRK3;MDGA1;ST8SIA4;ARSB;PCSK1;SLC7A10;GPC5;SCARA3;INHBB;SOD3;RXFP3;CHST11;ACE;SLC2A13;BACE2;H2-K1;ABHD3;ITPR2;SEMA3D;RYR2;GDF10;TGFB2;NR4A3;TGFBI;CYP4V3;PON2
JARID1A-20064375	47	2171	0.13467	0.0516131	0.0830574	3.24769e-09	-0.997176	19.4901	MED23;ARPC3;SNRPD1;EIF2A;CWF19L2;MRPS30;YIF1A;LOXL3;YARS2;TIMM50;2700060E02RIK;PHB2;VPS35;WDR45;EIF2B5;COPS5;MCM8;VPS45;MAGOH;CRNKL1;SCFD1;PARP2;COPB2;IQCC;MRPL15;AAAS;MCTS1;MRPL44;PSMA2;PSMB6;PSMC2;MRPL2;NDUFA9;DHODH;ATP5H;CTSD;EXOSC7;SEC61A1;LAMB2;NUP37;MED6;IFT88;LSG1;ATP6V0C;RSL1D1;ATP6V1H;USP30
NKX2-5-21415370	32	1507	0.0916905	0.0358272	0.0558633	1.87806e-06	-1.43314	18.8963	ORAI1;PRPSAP2;PLSCR2;RAP1A;ARPC3;ITGB5;ETFB;VPS13A;GTF3C6;NUDT2;ATP5S;SREBF1;TMEM176A;YIF1A;YIF1B;SEC61A1;RCN1;RXFP3;BCAN;SCRG1;9130401M01RIK;CYP4F13;ADAMTS1;CHEK2;ILVBL;DARS;EPHX1;COQ7;SGSH;USP30;ICOSL;PON2
EGR1-20690147	104	6207	0.297994	0.147564	0.15043	8.34097e-13	-0.672735	18.7104	BGN;FBXO10;SMO;RAP1A;PITPNM1;MRPS30;CACHD1;HTRA1;GRM3;VPS35;BCAN;MTDH;OLFML3;GRIN2C;F3;ERO1L;ADCYAP1;ARL2;LRP5;SLITRK3;CNNM3;MDGA1;OSGEP;ARSB;PCSK6;MAD2L2;MED6;IFT88;GPLD1;LSG1;ATP6V0C;SLC20A2;CIB1;TMEM143;ILVBL;EPHX1;SGSH;LCAT;SLC27A1;FUZ;AKAP11;PNPLA6;CACNA1E;TOP2B;MYOC;PRCP;RXFP3;SERPINH1;TINAGL1;TNKS1BP1;ITPR2;ANTXR1;PTGDS;SLC11A2;RYR2;PDIA6;PRPSAP2;PKMYT1;LY86;ETFB;HIBADH;YIF1A;YIF1B;ADCY9;A…
E2F4-21247883	61	2998	0.174785	0.071274	0.103511	1.14656e-10	-0.816581	18.6908	ORAI1;SULT1A1;FADS2;UROD;FADS1;KCNH1;SLC27A3;PKMYT1;ETFA;POLA2;AKAP11;YIF1A;CACHD1;YARS2;CACNA1E;TTC19;TTC17;VPS35;ADCY9;THNSL1;RFC3;VPS45;MAGOH;PARP2;PTGER3;PHYH;COPB1;COQ7;IQCC;MRPL17;AAAS;PSMA3;SLC16A1;ERO1L;LAG3;ARL2;NSMCE4A;LRP4;PRCP;DHODH;ATP5S;OSGEP;CTSD;ACAD8;MAD2L2;SLC30A1;UTP20;CHD8;ATP2A2;SEC61A2;NUP37;CHST11;SLC2A13;TM9SF1;CDH5;ITPR2;ESD;SLC11A2;RYR2;RSL1D1;DTWD1
ESRRB-18555785	33	1434	0.0945559	0.0340917	0.0604642	2.27266e-07	-1.20528	18.4374	MRPL15;AAAS;GRIN2C;MRPL44;PLSCR2;SLC16A1;ERO1L;SLC27A3;ETFA;ETFB;LRP5;CNNM3;NDUFA9;GGNBP2;HIBADH;MRPS30;YIF1B;NDUFV2;ATP2A2;BLVRA;TTC19;BCAN;AGA;CD320;C1QA;TMEM143;ILVBL;LTBP1;COQ7;NR4A3;ATP5G3;ICOSL;TFPI
CREM-20920259	106	5776	0.303725	0.137318	0.166407	1.20391e-15	-0.504523	17.332	ORAI1;SNX13;FADS2;SMO;VPS13A;NOP56;APOO;BBS7;PITPNM1;MRPS30;YIF1A;YIF1B;HTRA1;TIMM50;TTC19;2700060E02RIK;VPS35;ADCY9;MTDH;FDFT1;4833420G17RIK;COPS5;MCM8;SCFD1;PARP2;COPB2;COPB1;DARS;COQ7;IQCC;SND1;AAAS;SLC16A1;ERO1L;ARL6;ARL2;MRPL2;DSP;NSMCE4A;HSD17B12;CNNM3;NSMCE1;OSGEP;MAD2L2;ATP2A2;SEC61A2;SEC61A1;MED6;IFT88;DNASE2A;LSG1;H2-K1;ABHD3;ACSL6;ATP6V0C;ILVBL;FAT1;AI464131;SLC27A1;NRD1;ARPC3;ELFN2;EI…
CLOCK-20551151	15	407	0.0429799	0.00967596	0.033304	2.78661e-06	-1.31888	16.8694	PLA2G7;MTDH;SULT1A1;SERPINH1;ANGPTL2;SLC16A1;FCGRT;AQP4;PITPNM1;PTGER3;LOXL1;PDIA6;HRH1;EPHX1;ATP2A2
TRIM28-19339689	56	3072	0.160458	0.0730333	0.0874251	3.32592e-08	-0.960324	16.5358	MPPE1;SNX13;SMO;PCLO;MRPS30;CACHD1;PRDM5;HTRA1;TIMM50;2700060E02RIK;BCAN;ADCY9;MTDH;COPS5;MCM8;MLC1;COPB1;AAAS;SLC16A1;ERO1L;ARL2;LRP4;CNNM3;ARSB;FKBP10;CCDC126;RCN1;IFT88;DNASE2A;VTN;COL8A2;TGFB2;SLC27A3;ITGA5;SNRPD1;EIF2A;SREBF1;YARS2;GRAMD1A;EIF2B5;MAGOH;PTGER3;LMLN;PSMA3;PSMA4;PSMC2;AKR1B3;SLC30A1;PRLR;NDUFV2;CHST11;ACE;ANTXR1;SLC11A2;PDIA6;ABCG2
MYCN-18555785	45	2261	0.12894	0.0537527	0.0751871	8.10552e-08	-1.0088	16.4717	FADS2;SLC27A3;ETFA;GGNBP2;CWF19L2;OSGIN2;POLA2;HIBADH;YIF1A;PNPLA6;TTC19;PHB2;ADPRH;MTDH;TMEM132A;P4HA2;PLXNB1;MCM8;PARP2;LMLN;KBTBD3;PHYH;SND1;CTBS;MRPL44;PSMA2;SLC16A1;PSMC2;ERO1L;HAT1;ARL6;ARL2;ATP5S;OSGEP;CCDC126;SLC30A1;SEC61A1;LSG1;2410002F23RIK;CHEK2;RYR2;NKIRAS1;CIB1;ILVBL;ATP6V1H
TFAP2A-17053090	41	1904	0.117479	0.0452654	0.0722131	4.18036e-08	-0.967678	16.4411	FAT3;FADS1;ARPC3;ETFB;SREBF2;PITPNM1;SELPLG;TTC8;YARS2;TIMM50;TTC19;TTC17;PHB2;VPS35;GRAMD1A;GSS;LBP;SCFD1;CD320;HEPH;MRPL17;MCTS1;SLC16A2;ADCYAP1;HSD17B12;DHODH;OSGEP;PCDH20;PCSK6;GPC4;CHD8;NUP37;TNKS1BP1;TM9SF1;CDH5;ABHD3;ITPR2;VTN;CHEK2;ATP6V0C;RSL1D1
FLI1-20887958	43	2030	0.123209	0.0482609	0.0749482	2.987e-08	-0.874832	15.1577	PLSCR1;PLSCR2;FADS2;NRD1;FBXO10;SLC27A3;ARPC3;ETFB;SNRPD1;APOE;CALU;SREBF2;TMEM176A;YIF1B;UBA3;PHB2;GRAMD1A;4833420G17RIK;ILF2;EIF2B5;RFC3;VPS45;MAGOH;PHYH;CYP2J9;PSMD1;MRPL44;PSMA2;PSMC2;CNNM3;CCDC126;CD74;NDUFV2;IFT88;CHST11;TM9SF1;ABHD3;2410002F23RIK;PTGDS;ATR;NKIRAS1;DTWD1;PON2
EED-16625203	21	830	0.0601719	0.0197323	0.0404396	9.85052e-06	-1.158	13.3494	WNT7A;SLC16A2;GRIA2;SLITRK3;ST8SIA4;PCSK1;SLC7A10;LOXL1;CACNA1E;SERPINE2;BCAN;CHST11;ABHD3;ADAMTS1;SEMA3D;MAGOH;RYR2;MATN4;PTGER3;GDF10;TGFB2
TP53-18474530	22	827	0.0630372	0.019661	0.0433763	2.79376e-06	-1.04105	13.313	FAT3;WNT7A;FADS2;C4B;SNX7;SLC30A1;NNMT;HTRA1;SOD3;ADCY9;SLC2A13;SLC2A12;THNSL1;CSF1R;PLXNB1;SEMA3A;THSD4;CHAC2;LTBP1;TGFBI;DTWD1;LCAT
SRF-21415370	32	1634	0.0916905	0.0388465	0.0528441	9.48154e-06	-1.12567	13.0196	SLC27A1;UROD;SLC27A3;FUZ;ETFB;SREBF1;TMEM176A;HTRA1;GSS;NUCB1;ILF2;RFC3;POLR3H;PARP2;COQ7;MRPL44;ZFP677;DHODH;NSMCE1;ATP5S;ACAD8;EXOSC7;1500015O10RIK;SEC61A1;AGA;ESD;SEMA3A;ATP6V0C;RSL1D1;EPHX1;DTWD1;STOM
SOX2-21211035	60	3420	0.17192	0.0813066	0.0906132	3.77884e-08	-0.761008	13.0066	SNX13;PLSCR1;PLSCR2;SMO;GRIA2;LY86;PRDM5;HTRA1;GRM3;ADCY3;COPB1;CDH19;COL1A2;SLC16A1;ADCYAP1;ARL6;LRP5;PTPRZ1;MDGA1;SNX7;CCDC126;PCSK6;EDA;RCN1;SLC2A13;CHEK2;ACSL6;PACRG;SLC20A2;LTBP1;ATP6V1H;EGFL6;WNT7A;SREBF2;TTC8;GABRG1;GSS;SCRG1;PLXNB1;RFC3;ANGPT1;LMLN;LSAMP;HRH1;PSMC2;HAT1;ANAPC4;ST8SIA4;GPC5;SLC30A1;CHST11;ANXA1;AGA;CDH5;ITPR2;SEMA3D;SEMA3A;ANTXR1;RYR2;FOLH1
MYC-19030024	66	3868	0.189112	0.0919573	0.0971544	1.94751e-08	-0.732031	12.9966	SNX13;FADS2;UROD;ETFB;CWF19L2;APOE;POLA2;HIBADH;PRDM5;TIMM50;MTDH;9130401M01RIK;MCM8;PARP2;DARS;SND1;AAAS;F3;SLC16A1;MRPL2;HSD17B12;DHODH;OSGEP;FKBP10;CCDC126;MAD2L2;ATP2A2;SEC61A1;DNASE2A;LSG1;CHEK2;FUZ;EIF2A;GGNBP2;CALU;SREBF1;PNPLA6;YARS2;PHB2;THNSL1;ILF2;EIF2B5;ADAMTS1;POLR3H;MAGOH;BLZF1;KBTBD3;ATP5G3;PPP2R3C;MRPL17;MRPL15;PSMA3;PSMA2;PSMC2;HAT1;HAX1;PRCP;NDUFA9;CTSD;EXOSC7;NUP37;ANTXR1;CRYZL…
SOX2-20726797	47	2564	0.13467	0.0609562	0.0737143	4.2075e-07	-0.88356	12.9717	BGN;PLSCR1;UROD;FADS1;ITGB5;VPS13A;ITGA5;AKAP11;TTC8;CACHD1;LOXL3;NNMT;HTRA1;TTC17;CFH;FDFT1;P4HA2;MCM8;THSD4;MFAP2;CRNKL1;PARP2;HEPH;CTBS;DSP;LRP4;PRCP;PTPRZ1;COL9A3;PCSK6;PTPRF;CTSH;CTSD;GPC4;INHBB;ATP2A2;CHST11;TNKS1BP1;ITPR2;SEMA3A;ANTXR1;SLC11A2;RSL1D1;PDIA6;ABCG2;TGFB2;TFPI
ZFP42-18358816	31	1480	0.0888252	0.0351853	0.0536399	3.58738e-06	-0.986225	12.3654	PSMD1;MRPL17;MRPL15;COL1A2;PSMA3;FADS2;GRIA2;ARL6;ARL2;MRPL2;NDUFA9;HTR5B;SNRPD1;CWF19L2;AKR1B3;MRPS30;PHB2;ADPRH;MTDH;NUCB1;CYP4F13;COPS5;2410002F23RIK;MLC1;SLC11A2;BLZF1;NKIRAS1;ATP6V0C;LMLN;KBTBD3;ABCG2
PDX1-19855005	18	669	0.0515759	0.0159047	0.0356712	1.94985e-05	-1.13055	12.261	GRAMD1A;AGT;SLC27A1;AKR1E1;THNSL1;HAT1;MCM8;PRCP;HSD17B12;VPS45;NUDT2;CHEK2;BLZF1;CALU;C1QA;YIF1A;MAD2L2;KBTBD3
ESR1-17901129	14	444	0.0401146	0.0105556	0.029559	3.18649e-05	-1.17544	12.1705	GPLD1;SULT1A1;PLSCR2;FADS2;RAP1A;ETFA;ETFB;LBP;TTR;PTGDS;NKIRAS1;SLC20A2;NNMT;LCAT
MYC-18358816	59	3413	0.169054	0.0811402	0.0879142	8.27715e-08	-0.732646	11.9474	HTR5B;POLA2;HIBADH;MRPS30;YIF1B;PRDM5;TIMM50;VPS35;MTDH;COPS5;MCM8;MLC1;PARP2;IQCC;AAAS;SLC16A1;ARL2;MRPL2;LRP4;HSD17B12;DHODH;OSGEP;CCDC126;ACAD8;SEC61A1;BLVRA;LSG1;CHEK2;RDH5;SLC20A2;TGFB2;SLC27A1;ARPC3;SNRPD1;EIF2A;SREBF1;SREBF2;YARS2;PHB2;EIF2B5;POLR3H;MAGOH;BLZF1;CD320;LMLN;KBTBD3;MRPL17;MRPL15;PSMA3;PSMA2;PSMC2;AKR1B3;CTSD;SLC30A1;NDUFV2;2410002F23RIK;NKIRAS1;RSL1D1;DTWD1
KDM6A-18722178	15	479	0.0429799	0.0113877	0.0315923	1.80714e-05	-1.02726	11.2189	MRPL44;LSG1;PSMA2;UROD;FCGRT;ILF2;MCM8;RFC3;HAX1;NUDT2;CHEK2;MAGOH;OSGEP;MRPS30;ATP6V1H
PPARD-21283829	64	3447	0.183381	0.0819485	0.101433	1.39955e-09	-0.518589	10.5725	ORAI1;ETFA;PRDM5;BCAN;CFH;MTDH;ANGPTL2;LBP;VPS45;CDH19;MCTS1;ADCYAP1;ARL6;NSMCE4A;HSD17B12;SLITRK3;MMADHC;COL9A3;SEC61A1;BLVRA;NAA20;VIT;LSG1;STRA6;KCNJ16;CHEK2;RAB33A;RDH5;ATP6V1H;TGFBI;SLC27A3;ITGA8;SREBF1;MFGE8;PNPLA6;VCAM1;TCN2;NBAS;SCRG1;P4HA2;CSPG4;BLZF1;PTGER3;HRH1;ATP5G3;THBS4;MRPL15;MRPL44;TMEM74;PSMB6;HAX1;PCDH20;GPC5;NDUFV2;NUP37;SERPINH1;TINAGL1;ANXA1;SEMA3D;SEMA3A;ANTXR1;NR4A3;DTWD1;…
PPARG-19300518	10	272	0.0286533	0.00646649	0.0221868	0.000129913	-1.03151	9.23064	SULT1A1;ACAD8;AGT;FADS2;ILVBL;COQ7;ATP5G3;ETFB;CYP4V3;PON2
YAP1-20516196	44	2329	0.126074	0.0553693	0.0707052	4.65455e-07	-0.631136	9.20211	FAT1;FAT3;SIGLECH;NRD1;KCNH1;LY86;PCLO;BBS7;SREBF1;MRPS30;CACHD1;CACNA1E;SCRG1;EIF2B5;P4HA2;THSD4;PTGER3;LSAMP;HRH1;ATP5G3;HAPLN1;SND1;SLC16A2;ADCYAP1;DSP;GTF3C6;HSD17B10;ST8SIA4;PCDH20;GPC5;PRLR;SEC61A1;LAMB2;CHST11;ANXA1;BACE2;AGA;CDH5;SEMA3A;CHAC2;PDIA6;TGFB2;NR4A3;DTWD1
REST-21632747	40	2339	0.114613	0.0556071	0.0590061	1.62939e-05	-0.806982	8.89675	FADS1;SLC14A1;ELFN2;VPS13A;PCLO;YIF1A;CACNA1E;IFT27;GRM3;BCAN;GRAMD1A;NBAS;ADCY3;OLFML3;C1QA;PTGER3;PPP2R3C;AAAS;GRIN2C;SLC29A4;GLRA3;ADCYAP1;MDGA1;PCSK1;SLC7A10;FAM58B;PRLR;INHBB;SOD3;RXFP3;GPLD1;BACE2;CDH5;VTN;CYP4F14;ACSL6;RYR2;APLP1;ATP6V1H;USP30
SOX17-20123909	36	1947	0.103152	0.0462877	0.0568642	8.84803e-06	-0.679608	7.90745	SULT1A1;PLSCR1;PLSCR2;NUDT2;GGNBP2;OSGIN2;POLA2;SREBF1;SREBF2;YIF1A;PNPLA6;ENPP2;GRAMD1A;GSS;4833420G17RIK;COPS5;P4HA2;SCFD1;PHYH;PSMD1;MRPL15;PSMA3;ARL2;MRPL2;HAX1;EDA;VIT;MED6;SERPINH1;ANXA1;BACE2;LSG1;STRA6;CRYZL1;RYR2;CYP4V3
CTCF-18555785	31	1568	0.0888252	0.0372774	0.0515478	1.09742e-05	-0.67875	7.7513	WNT7A;KCNH1;SLC14A1;ARPC3;ITGA8;SNRPD1;CWF19L2;HIBADH;YIF1A;YARS2;NNMT;TTC19;RFC3;C1QA;PSMD1;MRPL17;AAAS;ARL2;PRCP;CNNM3;CCDC126;AKR1B3;SLC7A10;CTSH;MAD2L2;NDUFV2;RXFP3;SEMA3D;RYR2;PACRG;LTBP1
HNF4A-19761587	23	1126	0.0659026	0.0267694	0.0391332	9.60831e-05	-0.814029	7.53001	MRPL15;PLSCR1;SLC16A1;LY86;ARPC3;ETFA;MRPL2;LRP5;OSGEP;FKBP10;MRPS30;CD74;LAMB2;SERPINH1;GSS;THNSL1;VTN;RDH5;SLC20A2;ABCG2;DARS;ATP5G3;PON2
TAL1-20887958	40	2067	0.114613	0.0491406	0.0654726	9.08522e-07	-0.531149	7.38904	PLSCR1;PLSCR2;FADS2;SMO;PKMYT1;ETFB;ITGA5;NOP56;EIF2A;GGNBP2;APOE;SREBF2;NGLY1;TTC19;MTDH;ILF2;COPB2;DARS;ATP5G3;MRPL44;SLC16A1;ANAPC4;MRPL2;ERAP1;NSMCE1;ATP5S;EXOSC7;SLC30A1;NAA20;NUP37;H2-K1;CDH5;CSF1R;2410002F23RIK;CHEK2;PTGDS;ATP6V0C;SLC20A2;PDIA6;DTWD1
AR-19668381	58	3519	0.166189	0.0836602	0.0825289	5.12906e-07	-0.499577	7.23547	SNX13;FBXO10;LY86;CWF19L2;HIBADH;CACHD1;NNMT;HTRA1;GRM3;MTDH;OLFML3;LBP;MLC1;MATN4;COPB1;DARS;CDH19;SND1;SLC29A4;SLC16A1;ERO1L;MDGA1;PCSK1;PCSK6;ACAD8;LGALS3BP;EDA;GPLD1;SLC2A13;CSF1R;ACSL6;PACRG;RAB33A;SLC20A2;SLC27A3;FUZ;ARPC3;SREBF2;TTC8;TTC3;NGLY1;EIF2B5;CSPG4;RFC3;THSD4;PTGER3;PHYH;PSMD1;SLCO1C1;PTPRF;GPC5;SLC30A1;INHBB;SERPINH1;BACE2;ITPR2;RYR2;NKIRAS1
GATA1-19941827	35	1834	0.100287	0.0436013	0.0566853	6.14355e-06	-0.593309	7.11977	MPPE1;FAT3;RAP1A;LY86;ITGB5;APOE;PITPNM1;ADCY9;GRAMD1A;P4HA2;THSD4;ANGPT1;MFAP2;VPS45;KBTBD3;SND1;KANK2;LRP5;LRP4;PRCP;MDGA1;NSMCE1;ST8SIA4;FKBP10;CCDC126;CTSD;LGALS3BP;VIT;GPLD1;DNASE2A;CHEK2;SLC11A2;ABCG2;LTBP1;STOM
KLF4-18555785	43	2444	0.123209	0.0581033	0.0651058	3.82924e-06	-0.564567	7.04175	FADS1;ETFA;POLA2;CALU;MFGE8;MTDH;FDFT1;ANGPTL2;ADCY3;9130401M01RIK;4833420G17RIK;EIF2B5;P4HA2;PLXNB1;POLR3H;SCFD1;PARP2;PHYH;DARS;SND1;MRPL17;MRPL15;TMEM74;SLC16A1;ARL6;ARL2;PRCP;CNNM3;ATP5S;EXOSC7;GPC4;MAD2L2;SEC61A1;RCN1;LAMB2;CHST11;BACE2;CDH5;ESD;CYP4F13;CRYZL1;CIB1;USP30
PAX3-FKHR-20663909	24	1063	0.0687679	0.0252716	0.0434963	1.44768e-05	-0.627968	6.99742	PSMD1;KANK2;TMEM74;ERO1L;SLC16A2;NSMCE4A;CCDC80;PCDH20;PCSK6;LOXL1;CACNA1E;VCAM1;GRM3;ADCY9;CHST11;CDH5;SEMA3D;THSD4;ANGPT1;PACRG;GDF10;DARS;TGFB2;CDH19
DACH1-20351289	33	1698	0.0945559	0.040368	0.0541879	7.97501e-06	-0.590781	6.93529	FAT1;FADS2;ITGB5;ETFB;SNRPD1;YIF1A;YARS2;VPS35;ADCY3;GSS;ILF2;MAGOH;CD320;PARP2;LMLN;KBTBD3;MRPL17;MRPL44;PRCP;MDGA1;ATP5S;ATP2A2;SEC61A2;NUP37;SERPINE2;CHST11;SERPINH1;LSG1;TM9SF1;ABHD3;NKIRAS1;TMEM143;NR4A3
GATA1-21571218	48	2601	0.137536	0.0618358	0.0757	2.57818e-07	-0.448337	6.80173	MPPE1;PRPSAP2;FAT3;PLSCR1;FADS2;RAP1A;SLC14A1;ITGB5;ETFA;ITGA8;POLA2;SREBF2;YIF1A;PNPLA6;PHB2;GABRG1;NBAS;OLFML3;P4HA2;CSPG4;LBP;ANGPT1;IFIT3;KBTBD3;PHYH;COQ7;CDH19;SND1;MRPL44;SLC16A1;GTF3C6;LRP4;HSD17B12;MDGA1;NSMCE1;PCSK6;PTPRF;LGALS3BP;SEC61A1;CHST11;TINAGL1;LSG1;ABHD3;SLC11A2;ATR;RYR2;RAB33A;LTBP1
EOMES-21245162	22	932	0.0630372	0.0221572	0.04088	1.71714e-05	-0.619172	6.79372	MRPL17;PRPSAP2;PSMB6;FADS2;UROD;FADS1;ITGA5;PRCP;HSD17B12;CCDC80;LOXL1;ENPP2;SCARA3;ATP2A2;TTC19;NUP37;P4HA2;ANTXR1;APLP1;HEPH;TFPI;STOM
POU5F1-18692474	66	4233	0.189112	0.100635	0.088477	5.13997e-07	-0.467095	6.76402	SNX13;PLSCR1;UROD;PKMYT1;LY86;CWF19L2;APOE;YIF1A;CACHD1;NNMT;CFH;FDFT1;WDR45;ADCY3;OLFML3;COPS5;PARP2;IQCC;AAAS;SLC16A2;LAG3;ARL6;CNNM3;CCDC126;VIT;MED6;DNASE2A;LSG1;STRA6;CYP4F13;KCNJ16;ACSL6;SLC20A2;ILVBL;EPHX1;SULT1A1;FUZ;ARPC3;ITGA5;ZFP354B;NUDT2;SREBF1;SREBF2;YARS2;PHB2;GABRG1;ADPRH;GRAMD1A;EIF2B5;ANGPT1;KBTBD3;PHYH;PSMD1;MRPL44;HAT1;ATP5S;ATP5H;PTPRF;GPC4;NDUFV2;TNKS1BP1;CDH5;CRYZL1;APLP1;P…
RCOR3-21632747	50	2851	0.143266	0.0677793	0.0754872	6.20943e-07	-0.433563	6.19649	MED23;KCNE2;LY86;PCLO;YIF1A;PRDM5;CACNA1E;BCAN;MTDH;GRAMD1A;LBP;POLR3H;CD320;TOP2B;MATN4;C1QA;PHYH;DARS;ATP5G3;AAAS;GRIN2C;MRPL44;SLC29A4;GLRA3;LAG3;ADCYAP1;SLCO1C1;MDGA1;ATP5H;ST8SIA4;PCSK6;PTPRF;CTSD;FAM58B;SLC30A1;INHBB;ATP2A2;SOD3;VIT;ACE;TMEM173;VTN;ESD;SEMA3D;ACSL6;PACRG;ATP6V1H;TGFB2;EPHX1;USP30
ELK1-19687146	20	917	0.0573066	0.0218006	0.035506	0.000117963	-0.66802	6.04233	SND1;AAAS;MCTS1;PSMC2;NRD1;HAT1;ARPC3;EIF2A;MRPS30;ATP2A2;MED6;SERPINH1;ANXA1;MAGOH;SLC11A2;BLZF1;LMLN;DARS;DTWD1;TFPI
CREB1-20920259	54	3057	0.154728	0.0726767	0.0820511	1.64597e-07	-0.383498	5.99014	ORAI1;SLC27A1;FADS2;NRD1;FADS1;SMO;ELFN2;OSGIN2;POLA2;CALU;SREBF1;SREBF2;SELPLG;YIF1A;TIMM50;TTC19;H2-AA;2700060E02RIK;FDFT1;9130401M01RIK;FCGRT;4833420G17RIK;COPS5;P4HA2;PLXNB1;THSD4;MAGOH;TOP2B;COQ7;SND1;AAAS;PSMB6;ANAPC4;ARL2;MRPL2;HSD17B12;MDGA1;ATP5H;COL9A3;AKR1B3;EXOSC7;PRLR;SEC61A1;BLVRA;MED6;H2-K1;SLC11A2;NKIRAS1;ATP6V0C;RSL1D1;ILVBL;ABCG2;LTBP1;USP30
E2F1-17053090	33	1726	0.0945559	0.0410337	0.0535222	1.10539e-05	-0.512728	5.85162	MPPE1;ETFA;ETFB;POLA2;AKAP11;SELPLG;TIMM50;TTC17;PHB2;VPS35;ADAMTS1;RFC3;HEPH;MRPL17;AAAS;PRCP;HSD17B12;DHODH;OSGEP;NDUFV2;CHD8;MED6;SLC2A13;TM9SF1;VTN;ESD;KCNJ16;CHEK2;CRYZL1;CIB1;SGSH;USP30;EGFL6
REST-19997604	33	2118	0.0945559	0.050353	0.0442028	0.00048401	-0.763598	5.82885	APOE;POLA2;MFGE8;TTC3;CACHD1;TIMM50;2700060E02RIK;GABRG1;ADPRH;FDFT1;SCRG1;COPS5;P4HA2;PLXNB1;MCM8;TOP2B;LMLN;HEPH;IQCC;PSMA3;PSMA4;SLC16A1;HAT1;HFE2;CD74;SLC30A1;LGALS3BP;LAMB2;LSG1;ESD;ATP6V0C;DTWD1;USP30
TCFAP2C-20176728	45	2667	0.12894	0.0634049	0.0655349	6.43213e-06	-0.486749	5.81869	MPPE1;PRPSAP2;FADS2;FADS1;ITGB5;ZFP354B;NUDT2;APOE;CALU;SREBF1;SREBF2;MFGE8;YIF1A;YIF1B;LOXL3;YARS2;HTRA1;2700060E02RIK;FDFT1;WDR45;GRAMD1A;THNSL1;COPS5;MCM8;AQP4;COQ7;THBS4;PSMB6;SLC16A1;ERO1L;HAX1;LRP4;PRCP;CNNM3;NSMCE1;CCDC126;INHBB;LAMB2;SERPINE2;TM9SF1;CSF1R;GDF10;CIB1;TMEM143;NR4A3
ETS1-20019798	32	1607	0.0916905	0.0382046	0.0534859	6.83536e-06	-0.480092	5.70993	MED23;UROD;NRD1;FUZ;SNRPD1;CWF19L2;PNPLA6;TMEM209;NUCB1;EIF2B5;COPS5;P4HA2;MAGOH;BLZF1;PSMD1;AAAS;MCTS1;MRPL44;PSMA2;PSMB6;ARL6;HAX1;HSD17B12;NDUFA9;CHD8;SEC61A1;MED6;LSG1;CHEK2;NKIRAS1;TMEM143;USP30
KLF1-20508144	24	1144	0.0687679	0.0271973	0.0415706	4.53028e-05	-0.504688	5.04796	F3;MED23;SLC16A1;ADCYAP1;SLC27A3;PAQR6;CTSD;PNPLA6;UBA3;SLC2A13;LSG1;CDH5;ITPR2;AQP4;CHAC2;ACSL6;FAM180A;LMLN;PDIA6;ABCG2;HAPLN1;DTWD1;CDH19;STOM
MYC-20876797	27	1406	0.0773639	0.0334261	0.0439378	6.63651e-05	-0.515926	4.96338	AAAS;PLSCR1;GLRA3;KCNH1;ANAPC4;ITGA8;EIF2A;GPC5;LOXL1;HTRA1;NDUFV2;SEC61A2;RCN1;GABRG1;ADCY9;FDFT1;AGA;SCRG1;ESD;ADAMTS1;RFC3;SEMA3D;SEMA3A;RAB33A;FOLH1;ATP5G3;USP30
RUNX1-21571218	84	5071	0.240688	0.120557	0.12013	5.08598e-10	-0.226971	4.85703	ORAI1;MPPE1;PRPSAP2;FADS1;KCNH1;KCNE2;PKMYT1;NOP56;SELPLG;YIF1B;TTC19;BCAN;ADCY3;OLFML3;MCM8;LBP;MLC1;CRNKL1;COPB1;DARS;COQ7;SND1;ERO1L;ARL6;LRP5;HSD17B12;CNNM3;MDGA1;NSMCE1;HFE2;SLC7A10;PCSK6;ACAD8;CHD8;ATP2A2;BLVRA;LAMB2;TMEM173;LSG1;ABHD3;RAB33A;ATP6V0C;MED23;NRD1;ITGA5;GGNBP2;OSGIN2;CALU;SREBF2;PNPLA6;LOXL3;LOXL1;TMEM209;GABRG1;NUCB1;FCGRT;THNSL1;EIF2B5;CSPG4;THSD4;ANGPT1;MAGOH;BLZF1;TOP2B;PT…
TAL1-20566737	35	1875	0.100287	0.044576	0.0557105	9.75254e-06	-0.409112	4.72032	ORAI1;FAT1;UROD;SLC27A3;SLC14A1;LY86;HTR5B;NUDT2;CCDC80;POLA2;SREBF2;PNPLA6;NNMT;FDFT1;P4HA2;THSD4;ANGPT1;POLR3H;AQP4;PTGER3;DARS;GTF3C6;PRCP;PAQR6;NSMCE1;HFE2;GPC5;GPC4;LGALS3BP;BLVRA;MED6;CHST11;ITPR2;ABCG2;LTBP1
SMARCA4-20176728	22	1118	0.0630372	0.0265792	0.0364581	0.000226231	-0.511977	4.29751	PSMD1;MPPE1;MRPL17;PLA2G7;PSMB6;SMO;RAP1A;HAX1;PRCP;ATP5H;CALU;SREBF2;MFGE8;YIF1A;YIF1B;2700060E02RIK;SERPINE2;FDFT1;GRAMD1A;CSF1R;SLC11A2;RSL1D1
SFPI1-20887958	43	2369	0.123209	0.0563203	0.0668889	1.76518e-06	-0.31126	4.12334	ORAI1;PLSCR1;FADS2;NRD1;PKMYT1;HPRT;ARPC3;NOP56;SNRPD1;EIF2A;CALU;SREBF2;YIF1B;TTC3;YARS2;NIPSNAP3B;PHB2;ANGPTL2;4833420G17RIK;THNSL1;EIF2B5;TPRN;PHYH;COPB2;CTBS;SLC16A1;PSMC2;HAT1;ANAPC4;CNNM3;ATP5S;CCDC126;EXOSC7;MAD2L2;SLC30A1;NAA20;IFT88;DNASE2A;CSF1R;NKIRAS1;SLC20A2;TMEM143;DTWD1
NANOG-21062744	18	840	0.0515759	0.01997	0.0316059	0.000315008	-0.490486	3.95475	MRPL15;MCTS1;SLC27A1;UROD;ETFB;NDUFA9;PCSK1;SREBF2;GPC4;TTC8;RCN1;RXFP3;MTDH;WDR45;NKIRAS1;ATP6V0C;ILVBL;COQ7
TCF3-18467660	25	1388	0.0716332	0.0329981	0.0386351	0.000318619	-0.485428	3.90843	SNX13;SLC29A4;ERO1L;KCNH1;ITGB5;VPS13A;CNNM3;SREBF2;GPC5;GPC4;YARS2;SLC30A1;HTRA1;INHBB;RCN1;BCAN;ADCY9;MTDH;SLC2A13;ADCY3;TM9SF1;ITPR2;P4HA2;TOP2B;COPB1
SALL4-18804426	19	1006	0.0544413	0.0239165	0.0305248	0.000961265	-0.452216	3.14166	COL1A2;F3;PLSCR1;RAP1A;LRP4;SREBF1;EDA;NGLY1;RCN1;VIT;MED6;SERPINH1;WDR45;STRA6;P4HA2;TTR;KBTBD3;CYP4V3;TFPI
JARID2-20075857	25	1258	0.0716332	0.0299075	0.0417257	7.33601e-05	-0.308307	2.93512	GRIN2C;AI464131;WNT7A;ELFN2;DSP;SLITRK3;HTR5B;MDGA1;ARSB;FKBP10;HTRA1;SOD3;BCAN;CHST11;TINAGL1;FCRLS;NUCB1;H2-K1;CYP4F13;P4HA2;ADAMTS1;CRYZL1;MATN4;PTGER3;NR4A3
RAD21-21589869	37	2036	0.106017	0.0484036	0.0576136	9.58876e-06	-0.250134	2.89028	ORAI1;1700024P16RIK;MED23;UROD;KCNH1;RAP1A;NUDT2;CCDC80;CWF19L2;CALU;SREBF1;SELPLG;YARS2;TTC19;BCAN;9130401M01RIK;RFC3;POLR3H;C1QA;PTGER3;PHYH;COPB1;HAPLN1;THBS4;MRPL15;AAAS;COL1A2;LAG3;ARL6;HSD17B12;SLITRK3;ERAP1;CCDC126;RXFP3;CYP4F14;EPHX1;SGSH
RNF2-16625203	22	1219	0.0630372	0.0289803	0.0340569	0.000704284	-0.340116	2.46867	WNT7A;SLC16A2;SMO;SLITRK3;ST8SIA4;PCSK1;AKR1B3;LOXL3;LOXL1;CACNA1E;SERPINE2;BCAN;ADCY9;CHST11;H2-K1;ADAMTS1;TRPC6;SEMA3A;ANGPT1;CRYZL1;RYR2;LSAMP
WT1-20215353	29	1663	0.0830946	0.0395359	0.0435586	0.000181984	-0.257198	2.21488	SLC27A1;NRD1;FADS1;SMO;ETFB;ITGA5;GGNBP2;HIBADH;SREBF2;LOXL3;LOXL1;ADPRH;MTDH;TMEM132A;PLXNB1;COL1A2;PRCP;GPC4;SLC30A1;INHBB;EDA;RCN1;SOD3;SLC2A12;ITPR2;CRYZL1;GDF10;TGFBI;ICOSL
ZFP281-18358816	13	578	0.0372493	0.0137413	0.023508	0.00137921	-0.315015	2.07477	MCTS1;ADAMTS1;ITGA5;LRP5;FKBP10;CCDC126;CTSD;RSL1D1;PNPLA6;PHYH;ABCG2;CACNA1E;BLVRA
FOXA2-19822575	50	2968	0.143266	0.0705608	0.0727057	1.9318e-06	-0.157165	2.06783	ORAI1;FAT3;MED23;KCNH1;ITGB5;ETFB;VPS13A;CWF19L2;APOO;HIBADH;CACHD1;ENPP2;CACNA1E;VCAM1;FDFT1;GRAMD1A;GSS;PLXNB1;THSD4;LSAMP;PHYH;THBS4;PSMD1;PSMA3;ERO1L;DSP;LRP5;CNNM3;NSMCE1;ARSB;COL9A3;PCSK6;PTPRF;CTSH;RCN1;BLVRA;TINAGL1;TNKS1BP1;ITPR2;KCNJ16;ANTXR1;CHEK2;ACSL6;SLC20A2;RSL1D1;ABCG2;TGFBI;PON2;TFPI;STOM
CHD1-19587682	17	843	0.0487106	0.0200414	0.0286692	0.000884876	-0.279115	1.9622	AAAS;ANAPC4;ARL6;ETFB;HAX1;GTF3C6;HSD17B12;NDUFA9;CWF19L2;APOE;SREBF2;YARS2;MED6;FDFT1;LSG1;CHEK2;COQ7
NANOG-16518401	43	3520	0.123209	0.083684	0.0395252	0.00749047	-0.302389	1.47993	MPPE1;FADS2;CWF19L2;HIBADH;PRDM5;MTDH;COPS5;DARS;ADCYAP1;MRPL2;SEC61A1;RCN1;A930024E05RIK;STRA6;KCNJ16;CHEK2;PACRG;SLC20A2;CIB1;EGFL6;PON2;NRD1;ITGB5;ITGA5;LOXL1;NGLY1;GABRG1;TCN2;GSS;EIF2B5;TRPC6;TOP2B;KBTBD3;MRPL15;PSMC2;PTPRF;CTSD;GPC4;BACE2;CDH5;ANTXR1;RYR2;FOLH1
LYL1-20887958	16	752	0.0458453	0.0178779	0.0279673	0.000721009	-0.179112	1.29585	VIT;SLC29A4;FADS2;FADS1;DSP;ITGA5;ERAP1;CHEK2;NSMCE1;CTSD;C1QA;PTGER3;CYP2J9;DTWD1;SUN2;H2-AA
WT1-19549856	7	199	0.0200573	0.004731	0.0153263	0.00168011	-0.177993	1.13718	ANTXR1;MPPE1;ST8SIA4;APOE;CALU;P4HA2;ETFB
EOMES-20176728	29	1744	0.0830946	0.0414616	0.0416329	0.000390937	-0.135793	1.06556	WNT7A;RAP1A;NUDT2;EIF2A;CALU;SREBF2;MFGE8;YIF1A;YIF1B;2700060E02RIK;FDFT1;WDR45;GRAMD1A;EIF2B5;COPS5;AQP4;HRH1;ATP5G3;PSMB6;SLC16A1;PRCP;NDUFA9;ATP5H;CCDC126;PRLR;TM9SF1;CSF1R;2410002F23RIK;ABCG2
RCOR2-21632747	10	401	0.0286533	0.00953332	0.01912	0.00234622	-0.145584	0.881506	MTDH;FADS1;SMO;ESD;GTF3C6;MFAP2;C4B;C1QA;IFT27;CYP4V3
MEIS1-20887958	26	1452	0.0744986	0.0345196	0.0399789	0.000264665	-0.0413106	0.340278	PKMYT1;ETFB;ITGA5;MDGA1;NSMCE1;GGNBP2;ATP5H;SREBF1;TMEM176A;YIF1A;YIF1B;NGLY1;TM9SF1;CDH5;THNSL1;MCM8;RFC3;CHEK2;PTGDS;TOP2B;RAB33A;TMEM143;ILVBL;DARS;CYP2J9;TGFBI
MEF2A-21415370	18	1048	0.0515759	0.024915	0.0266609	0.00351132	-0.0560091	0.31655	PSMD1;MED23;SLC16A1;PSMC2;NRD1;AKR1B3;INHBB;CHD8;ATP2A2;2700060E02RIK;SCRG1;9130401M01RIK;ADAMTS1;RYR2;RSL1D1;LTBP1;TGFB2;USP30
SETDB1-19884257	38	2353	0.108883	0.0559399	0.0529426	8.8031e-05	-0.0324721	0.303219	ORAI1;BTBD17;KCNH1;FUZ;ITGB5;ETFB;ELFN2;C4B;PCLO;LOXL1;TTC17;2700060E02RIK;BCAN;MTDH;THNSL1;PLXNB1;TRPC6;THSD4;MFAP2;CD320;COQ7;MRPL44;SLCO1C1;ZFP677;MDGA1;NSMCE1;OSGEP;CTSH;ACAD8;PRLR;1500015O10RIK;DNASE2A;AGA;ESD;CHAC2;APLP1;EPHX1;DTWD1
GFI1B-20887958	33	1871	0.0945559	0.0444809	0.050075	5.25758e-05	-0.0257977	0.254191	MED23;PLSCR2;FBXO10;ITGB5;APOE;CALU;TMEM176A;MTDH;ADCY3;EIF2B5;CD320;PTGER3;PHYH;CYP2J9;PSMD1;SND1;CTBS;MRPL44;SLC16A1;LAG3;PRCP;CCDC126;EXOSC7;SLC30A1;NDUFV2;NAA20;NUP37;IFT88;VTN;2410002F23RIK;CRYZL1;DTWD1;USP30
TET1-21451524	32	1839	0.0916905	0.0437201	0.0479704	8.75196e-05	-0.0144219	0.134753	SMO;GGNBP2;CALU;PITPNM1;YIF1A;YIF1B;PNPLA6;NNMT;TIMM50;TTC19;VPS35;NBAS;ADCY3;9130401M01RIK;TRPC6;POLR3H;KBTBD3;SND1;COL1A2;MRPL2;HAX1;PTPRZ1;PAQR6;ATP5S;ATP2A2;ACE;LSG1;VTN;PTGDS;NR4A3;TGFBI;SGSH
SPI1-20517297	23	1249	0.0659026	0.0296936	0.036209	0.000408685	-0.00719606	0.0561477	GRIN2C;CTBS;SMO;HAT1;LY86;FUZ;NSMCE1;ATP5S;CWF19L2;CALU;MRPS30;TIMM50;BLVRA;NUCB1;CDH5;TMEM132A;ANTXR1;MAGOH;COL8A2;MATN4;PDIA6;HRH1;STOM
SIN3B-21632747	83	4302	0.237822	0.102275	0.135547	3.2471e-13	0	0	UROD;FADS1;APOO;PCLO;PITPNM1;YIF1A;CACHD1;PRDM5;UBA3;IFT27;GRM3;TTC19;BCAN;TPRN;MLC1;COPB2;DARS;SLC29A4;GLRA3;ADCYAP1;ARL2;MRPL2;DSP;LRP4;PTPRZ1;MDGA1;NSMCE1;CCDC126;MAD2L2;CHD8;SEC61A1;NAA20;SOD3;MED6;IFT88;DNASE2A;VTN;ACSL6;ATP6V0C;TMEM143;ILVBL;ATP6V1H;FAT1;SLC27A1;FUZ;NUDT2;TTC8;PNPLA6;YARS2;LOXL1;CACNA1E;PHB2;TCN2;GRAMD1A;FCGRT;THNSL1;EIF2B5;MAGOH;CD320;C1QA;LMLN;PHYH;ATP5G3;MRPL17;MRPL44;PS…
FOXP3-21729870	30	1404	0.0859599	0.0333785	0.0525814	3.53844e-06	0	0	PSMD1;MRPL17;MRPL44;MED23;PSMC2;UROD;FUZ;MRPL2;PRCP;NDUFA9;AIMP1;FKBP10;ACAD8;MRPS30;MAD2L2;PNPLA6;PHB2;SERPINH1;LSG1;NBAS;COPS5;RFC3;BLZF1;CD320;ATR;NKIRAS1;COPB1;ATP5G3;DTWD1;USP30
SIN3A-21632747	24	1186	0.0687679	0.0281958	0.0405721	7.80599e-05	0	0	SLC29A4;LAG3;ARL2;FUZ;ETFB;LRP4;NUDT2;CALU;PCLO;SREBF1;EXOSC7;YIF1A;TTC3;NDUFV2;SEC61A1;PHB2;IFT88;RFC3;APLP1;COPB2;ATP6V1H;NR4A3;USP30;PPP2R3C
JUN-21703547	29	1585	0.0830946	0.0376816	0.045413	8.1755e-05	0	0	ITGB5;SNRPD1;OSGIN2;PNPLA6;PLXNB1;ADAMTS1;SCFD1;SND1;PSMA2;PRCP;MDGA1;PCDH20;GPC5;GPC4;CD74;NDUFV2;SEC61A2;BLVRA;RXFP3;BACE2;AGA;AGT;ABHD3;CHAC2;RYR2;NKIRAS1;PDIA6;FOLH1;LTBP1
PADI4-21655091	20	1037	0.0573066	0.0246535	0.0326531	0.000553229	0	0	PSMA3;PSMA2;MRPL2;EIF3E;EIF2A;ST8SIA4;EXOSC7;CHD8;BLVRA;LSG1;OLFML3;EIF2B5;VPS45;CHAC2;CRYZL1;BLZF1;NKIRAS1;KBTBD3;NR4A3;DTWD1
CEBPB-20176806	26	1588	0.0744986	0.0377529	0.0367457	0.000968106	0	0	BTBD17;FADS1;KCNE2;ITGA8;C4B;CWF19L2;PITPNM1;LOXL3;TTC19;VPS35;ADCY9;TCN2;MATN4;IQCC;PPP2R3C;PSMB6;HAX1;PRCP;HFE2;PCSK1;RCN1;BACE2;ABHD3;TGFB2;NR4A3;SGSH
SPI1-20176806	26	1654	0.0744986	0.039322	0.0351766	0.00169471	0	0	PRPSAP2;FADS1;ITGA5;C4B;CCDC80;CWF19L2;CALU;PITPNM1;LOXL3;VCAM1;MTDH;KBTBD3;COQ7;IQCC;F3;ERO1L;LRP4;PRCP;PAQR6;CCDC126;ATP2A2;MED6;ANXA1;BACE2;NR4A3;STOM
FOXP2-21765815	20	1164	0.0573066	0.0276728	0.0296338	0.00213571	0	0	SLC39A12;PSMA3;SLC14A1;PRCP;HFE2;CWF19L2;PCDH20;CALU;PCLO;ENPP2;INHBB;GRM3;MED6;GABRG1;LSG1;GRAMD1A;SEMA3A;MAGOH;SCFD1;PON2
IRF8-21731497	8	319	0.0229226	0.00758386	0.0153388	0.00603145	0	0	CTSD;LSG1;CD74;TGFB2;LY86;HAX1;ITGA5;PRCP
SMAD4-21741376	35	2738	0.100287	0.0650928	0.0351937	0.00813452	0	0	ORAI1;SNX13;PLSCR2;UROD;ITGB5;ETFB;CWF19L2;AKAP11;CACHD1;CACNA1E;VCAM1;GRM3;NBAS;ANGPT1;MLC1;AQP4;IFIT3;TOP2B;MRPL15;MDGA1;ST8SIA4;SNX7;ARSB;GPC4;FAM58B;SCARA3;PRLR;LGALS3BP;ATP2A2;TMEM173;SEMA3A;FAM180A;RAB33A;SLC20A2;PDIA6
TFEB-21752829	14	808	0.0401146	0.0192093	0.0209053	0.00882214	0	0	ORAI1;PRPSAP2;SNX13;UROD;OSGIN2;AKAP11;YIF1B;YARS2;UTP20;VPS35;THNSL1;ILVBL;ATP6V1H;PPP2R3C
PPARG-20176806	14	837	0.0401146	0.0198987	0.0202159	0.0116684	0	0	SLC29A4;PSMB6;ITGB5;ETFA;LRP4;C4B;NSMCE1;CCDC80;POLA2;TTC3;MTDH;PACRG;PDIA6;PPP2R3C
GATA2-21666600	13	837	0.0372493	0.0198987	0.0173506	0.0250149	0	0	PLSCR2;VPS13A;YIF1B;NNMT;UBA3;SLC2A12;CDH5;THNSL1;THSD4;CHEK2;CRYZL1;TGFB2;TFPI
SMAD3-21741376	18	1460	0.0515759	0.0347098	0.0168661	0.0650966	0	0	MRPL15;ETFB;ITGA5;ST8SIA4;SNX7;GPC4;FAM58B;CACHD1;SLC30A1;PRLR;VCAM1;CHST11;TMEM173;ANGPTL2;NBAS;ANGPT1;SLC20A2;NR4A3
IKZF1-21737484	3	155	0.00859599	0.00368495	0.00491104	0.141948	0	0	GRIN2C;PITPNM1;GDF10
ZNF652-21678463	2	112	0.00573066	0.00266267	0.00306799	0.241347	0	0	EDA;WNT7A
MYBL1-21750041	2	161	0.00573066	0.00382759	0.00190307	0.388455	0	0	TMEM143;MED6
NOTCH1-21737748	2	245	0.00573066	0.0058246	-9.39374e-05	0.604659	0	0	NKIRAS1;THNSL1
ESR1-15608294	5	98	0.0143266	0.00232984	0.0119968	0.0016611	0.00417949	-0.0267499	BCAN;ABCG2;COL1A2;CTSD;AGT
TRIM28-17542650	18	3568	0.0515759	0.0848251	-0.0332492	0.993146	5.89553	-0.040546	KCNH1;SMO;RAP1A;ETFB;PRDM5;NNMT;HTRA1;TTC19;SND1;ARL2;LRP5;WNT7A;C1QA;LSAMP;GPC4;RYR2;FOLH1;NR4A3
SOX2-16153702	20	1278	0.0573066	0.030383	0.0269236	0.00588054	0.00933679	-0.0479548	MRPL15;MCTS1;PSMC2;ARL6;HSD17B12;OSGEP;ENPP2;SLC30A1;VPS35;SLC2A12;OLFML3;ILF2;STRA6;LBP;SEMA3A;BLZF1;NKIRAS1;C1QA;NR4A3;HEPH
CTNNB1-20615089	2	637	0.00573066	0.015144	-0.00941329	0.968775	1.8764	-0.0595254	ETFB;TMEM209
NANOG-16153702	25	1686	0.0716332	0.0400827	0.0315505	0.0043339	0.0140109	-0.0762371	PKMYT1;RAP1A;EIF2A;ENPP2;VPS35;OLFML3;ILF2;LBP;ANGPT1;BLZF1;MCTS1;PSMC2;ANAPC4;ARL6;PRCP;HSD17B12;OSGEP;ST8SIA4;GPC4;SLC30A1;SERPINH1;ANXA1;STRA6;SEMA3A;ABCG2
ZIC3-20872845	1	365	0.00286533	0.00867746	-0.00581213	0.952038	2.09054	-0.102751	GGNBP2
CRX-20693478	14	668	0.0401146	0.0158809	0.0242337	0.00174446	0.0170079	-0.108023	TCN2;FAT3;KCNH1;ILF2;CSPG4;HAX1;VPS45;CHEK2;ACSL6;OSGEP;APOE;OSGIN2;EXOSC7;MAD2L2
POU5F1-18347094	33	2109	0.0945559	0.0501391	0.0444168	0.000450195	0.0171863	-0.132435	FAT3;PLSCR1;KCNH1;LY86;MRPS30;TTC3;YARS2;ENPP2;TTC17;GABRG1;CFH;GRAMD1A;C1QA;IQCC;AAAS;MYOC;PSMA3;SLC16A2;CNNM3;PTPRF;GPC4;RCN1;VIT;TNKS1BP1;CYP4F13;SEMA3D;ACSL6;CRYZL1;COL8A2;FOLH1;ILVBL;ABCG2;NR4A3
STAT3-20064451	13	2202	0.0372493	0.05235	-0.0151008	0.922799	1.68771	-0.135597	NRD1;RAP1A;ARPC3;SELPLG;CACNA1E;GRAMD1A;ADCYAP1;NSMCE1;PCSK1;SLC7A10;CHD8;CHST11;TM9SF1
SOX2-19030024	16	863	0.0458453	0.0205168	0.0253284	0.00282783	0.0398866	-0.234064	TMEM74;HIBADH;CACHD1;YARS2;NDUFV2;ATP2A2;SEC61A1;RCN1;SERPINH1;FDFT1;WDR45;PLXNB1;KCNJ16;VPS45;LMLN;LTBP1
ERG-20887958	34	1969	0.0974212	0.0468107	0.0506105	6.06155e-05	0.0303846	-0.295063	SNX13;PLSCR1;FADS2;NRD1;FADS1;SMO;PKMYT1;HPRT;CALU;SREBF2;NGLY1;NIPSNAP3B;MTDH;THNSL1;EIF2B5;TPRN;SCFD1;CD320;COPB2;MCTS1;MRPL44;PSMA2;CNNM3;EXOSC7;MAD2L2;BLVRA;NAA20;DNASE2A;CHEK2;RDH5;SLC20A2;TMEM143;PDIA6;DTWD1
POU5F1-18700969	3	567	0.00859599	0.0134798	-0.00488379	0.849683	1.82156	-0.296717	CWF19L2;AKR1B3;GPC4
VDR-20736230	7	230	0.0200573	0.00546799	0.0145893	0.00366697	0.0631904	-0.354396	FDFT1;NKIRAS1;FADS2;FADS1;DTWD1;VPS13A;PON2
ETS2-20176728	1	215	0.00286533	0.00511138	-0.00224605	0.832928	2.29602	-0.41973	LAMB2
CDX2-20551321	3	504	0.00859599	0.011982	-0.00338604	0.788982	1.84256	-0.436708	LRP5;NSMCE1;LGALS3BP
NR4A2-19515692	1	207	0.00286533	0.00492119	-0.00205586	0.821452	2.28515	-0.449448	PRCP
ZNF274-21170338	2	327	0.00573066	0.00777405	-0.00204339	0.755126	1.90143	-0.534054	PCDH20;WNT7A
TP53-16413492	3	449	0.00859599	0.0106745	-0.00207848	0.720571	1.72043	-0.563805	ADCY9;CACNA1E;LTBP1
TP63-19390658	1	179	0.00286533	0.00425552	-0.00139019	0.774734	2.38561	-0.608893	ILF2
HCFC1-20581084	2	306	0.00573066	0.0072748	-0.00154414	0.722097	1.90331	-0.619709	LSG1;ILF2
NR1I2-20693526	16	939	0.0458453	0.0223237	0.0235216	0.00618586	0.126915	-0.645424	1700024P16RIK;SMO;LY86;LRP5;DHODH;PCSK6;PTPRF;SREBF1;EXOSC7;NNMT;HTRA1;ADCY9;9130401M01RIK;ANTXR1;PTGDS;EPHX1
STAT3-1855785	4	572	0.0114613	0.0135986	-0.00213733	0.699491	1.84602	-0.659774	AAAS;PLSCR1;EIF2B5;APOE
RARG-19884340	9	390	0.025788	0.00927181	0.0165162	0.00618819	0.137836	-0.700913	ANXA1;PLSCR2;ESD;POLR3H;CALU;TOP2B;CTSD;LOXL1;LTBP1
CREB1-15753290	13	957	0.0372493	0.0227516	0.0144977	0.0599423	0.269588	-0.758723	NRD1;MRPL2;NUDT2;OSGEP;CALU;ACAD8;SREBF2;MRPS30;LOXL3;RFC3;MAGOH;COPB2;NR4A3
MYCN-21190229	3	373	0.00859599	0.00886765	-0.000271662	0.599577	1.70621	-0.872779	GPLD1;ST8SIA4;NGLY1
STAT1-20625510	5	656	0.0143266	0.0155957	-0.00126901	0.635666	1.9387	-0.87839	NUCB1;NSMCE1;SLC20A2;MRPS30;FOLH1
CHD7-19251738	1	141	0.00286533	0.00335211	-0.000486785	0.69127	2.49207	-0.920136	CRYZL1
MYC-19915707	40	2979	0.114613	0.0708223	0.0437908	0.00206793	0.1593	-0.984665	SLC27A1;FADS1;SLC14A1;CCDC80;GGNBP2;SREBF1;PRDM5;LOXL3;ANGPTL2;GSS;SCRG1;FCGRT;TMEM132A;ADAMTS1;LBP;MFAP2;MLC1;MATN4;KBTBD3;AAAS;PSMB6;PSMC2;PTPRZ1;CNNM3;NDUFA9;ARSB;MAD2L2;SCARA3;SLC30A1;NDUFV2;LGALS3BP;LSG1;AGA;H2-K1;PTGDS;ILVBL;ABCG2;LTBP1;TGFB2;LCAT
EP300-20729851	29	2093	0.0830946	0.0497587	0.0333359	0.00555692	0.195348	-1.01439	FADS2;SLC14A1;ITGB5;NUDT2;HTRA1;TIMM50;2700060E02RIK;ANGPTL2;OLFML3;P4HA2;PLXNB1;CSPG4;TTR;AAAS;F3;PSMA3;PSMC2;LAG3;LRP5;ATP5H;VIT;SERPINH1;TINAGL1;STRA6;RYR2;RDH5;TGFB2;NR4A3;TGFBI
LMO2-20887958	29	1741	0.0830946	0.0413903	0.0417043	0.000380452	0.144432	-1.13728	PLSCR1;PLSCR2;FADS2;FADS1;SLC27A3;ITGA5;APOE;SREBF2;H2-AA;P4HA2;ANGPT1;C1QA;PTGER3;CYP2J9;SLC29A4;GTF3C6;HSD17B12;MDGA1;NSMCE1;CTSD;VIT;SERPINE2;GPLD1;TINAGL1;CDH5;CSF1R;ITPR2;CHEK2;PON2
JARID2-20064375	20	1117	0.0573066	0.0265554	0.0307512	0.00133491	0.174498	-1.15498	AI464131;WNT7A;SLC16A2;ELFN2;MDGA1;CACHD1;SCARA3;HTRA1;CACNA1E;INHBB;BCAN;CHST11;SLC2A13;H2-K1;ADAMTS1;SEMA3D;COL8A2;PTGER3;TGFB2;NR4A3
ELF1-20517297	19	1020	0.0544413	0.0242493	0.0301919	0.00112441	0.175022	-1.18848	LAG3;ARL2;ETFA;ITGA5;ATP5S;FAM58B;PNPLA6;SLC2A12;CDH5;MCM8;CHEK2;SCFD1;CD320;NKIRAS1;RAB33A;MATN4;HRH1;TGFB2;EPHX1
SMAD-19615063	1	124	0.00286533	0.00294796	-8.26295e-05	0.644552	2.74554	-1.20584	ENPP2
ESR1-20079471	2	216	0.00573066	0.00513515	0.000595505	0.536925	1.96533	-1.22223	MTDH;THSD4
CCND1-20090754	32	2137	0.0916905	0.0508047	0.0408858	0.00111943	0.190846	-1.29679	SLC27A1;UROD;FADS1;ETFB;SREBF1;SREBF2;YIF1A;VPS35;FDFT1;OLFML3;THNSL1;COPS5;BLZF1;TOP2B;KBTBD3;COPB2;MRPL15;AAAS;COL1A2;PSMB6;AKR1E1;HAX1;LRP4;PRCP;FKBP10;MAD2L2;VTN;2410002F23RIK;CHEK2;CRYZL1;TMEM143;ILVBL
E2F1-21310950	19	1145	0.0544413	0.0272211	0.0272202	0.00394712	0.2632	-1.45675	MPPE1;GLRA3;SLC16A2;FBXO10;ARL6;PKMYT1;VPS13A;SNRPD1;POLA2;MFGE8;LOXL3;VIT;AGT;NUCB1;ABHD3;ESD;RFC3;TMEM143;DARS
NANOG-18692474	44	3052	0.126074	0.0725578	0.0535167	0.000294112	0.179595	-1.46039	SULT1A1;SNX13;PLSCR1;FADS2;SLC27A3;PKMYT1;ITGB5;APOE;HIBADH;CACHD1;YARS2;NNMT;CFH;FDFT1;GRAMD1A;COPS5;THSD4;MAGOH;MCTS1;SLC16A2;LAG3;HAT1;ARL6;HAX1;PTPRZ1;MDGA1;ATP5S;ATP5H;GPC4;SLC30A1;NDUFV2;RCN1;VIT;RXFP3;DNASE2A;CDH5;CYP4F13;KCNJ16;CHEK2;CRYZL1;PDIA6;ABCG2;LTBP1;TGFBI
SOX2-18555785	5	497	0.0143266	0.0118156	0.00251104	0.396956	1.67028	-1.54322	FDFT1;PLSCR1;RFC3;PTPRZ1;TFPI
NANOG-18700969	4	344	0.0114613	0.00817821	0.00328311	0.321984	1.48085	-1.67818	CRYZL1;SNX13;SLC16A1;RCN1
POU5F1-18555785	6	555	0.017192	0.0131945	0.00399748	0.316333	1.47081	-1.69284	AAAS;GSS;PSMC2;LY86;YIF1A;COPB1
CTNNB1-20460455	18	988	0.0515759	0.0234886	0.0280874	0.00190689	0.270471	-1.69376	BTBD17;FAT3;MYOC;ITGB5;DSP;NDUFA9;UTP20;BCAN;GPLD1;ITPR2;ANGPT1;FAM180A;PARP2;SLC20A2;LSAMP;TMEM143;TGFB2;STOM
HTT-18923047	8	566	0.0229226	0.013456	0.00946663	0.103805	0.751659	-1.70269	TTR;MAGOH;PCSK1;SLC7A10;PCLO;LTBP1;CYP2J9;LUM
PHC1-16625203	15	922	0.0429799	0.0219195	0.0210604	0.0116061	0.39278	-1.75032	SLC29A4;SLC16A2;SMO;SLITRK3;GPC5;LOXL3;ATP2A2;SERPINE2;BCAN;ADAMTS1;SEMA3A;RYR2;MATN4;PTGER3;GDF10
EP300-21415370	11	1014	0.0315186	0.0241067	0.00741193	0.226624	1.18344	-1.75678	GRIN2C;SLC16A1;ARPC3;PRDM5;SCARA3;VCAM1;CHST11;SCRG1;THNSL1;RYR2;LTBP1
NANOG-18555785	10	542	0.0286533	0.0128854	0.0157679	0.0169636	0.440941	-1.79758	MCTS1;SLC2A13;PLSCR1;GRAMD1A;ETFB;CHEK2;MAGOH;RYR2;PNPLA6;RCN1
GABP-17652178	14	1001	0.0401146	0.0237976	0.016317	0.0430787	0.579877	-1.82355	MRPL44;PSMC2;NRD1;EIF2A;CALU;MED6;LSG1;TM9SF1;COPS5;MAGOH;BLZF1;SCFD1;DTWD1;USP30
EST1-17652178	13	1001	0.0372493	0.0237976	0.0134516	0.078448	0.724726	-1.84466	AAAS;PSMA3;PSMA2;PSMB6;NRD1;ARL6;EIF2A;MED6;NUCB1;COPS5;CHAC2;BLZF1;COQ7
E2F4-17652178	14	1002	0.0401146	0.0238214	0.0162932	0.0433695	0.60836	-1.90903	MRPL17;AAAS;PSMA3;HAT1;ARL6;RAP1A;NUDT2;ST8SIA4;POLA2;MED6;MCM8;RFC3;SLC11A2;DARS
SOX2-18358816	8	785	0.0229226	0.0186625	0.00426015	0.33	1.7254	-1.91289	MCTS1;PLSCR1;ARL2;GPC4;RCN1;BLVRA;ABCG2;TFPI
SMAD3-18955504	31	1936	0.0888252	0.0460262	0.042799	0.000461518	0.255721	-1.96419	FADS2;FADS1;ETFA;APOO;OSGIN2;SREBF1;TMEM176A;YARS2;VPS35;GSS;ILF2;BLZF1;TOP2B;CTBS;F3;SLC16A1;PSMC2;MRPL2;DSP;ERAP1;SNX7;ARSB;PTPRF;NUP37;TINAGL1;TNKS1BP1;ANXA1;TGFB2;NR4A3;TGFBI;STOM
SMAD2-18955504	31	1936	0.0888252	0.0460262	0.042799	0.000461518	0.255721	-1.96419	FADS2;FADS1;ETFA;APOO;OSGIN2;SREBF1;TMEM176A;YARS2;VPS35;GSS;ILF2;BLZF1;TOP2B;CTBS;F3;SLC16A1;PSMC2;MRPL2;DSP;ERAP1;SNX7;ARSB;PTPRF;NUP37;TINAGL1;TNKS1BP1;ANXA1;TGFB2;NR4A3;TGFBI;STOM
POU5F1-16518401	18	1550	0.0515759	0.0368495	0.0147264	0.099255	0.862533	-1.99251	PLSCR1;SLC27A1;NRD1;LOXL1;BCAN;CFH;LSAMP;GRIN2C;PSMC2;ITIH3;PCSK6;INHBB;CDH5;PACRG;CIB1;APLP1;EGFL6;ICOSL
MYC-18940864	8	746	0.0229226	0.0177353	0.00518733	0.283122	1.59809	-2.01659	MTDH;TMEM173;ESD;HFE2;TOP2B;NKIRAS1;NGLY1;THBS4
FOXP3-17237761	5	257	0.0143266	0.00610988	0.00821676	0.0664283	0.749854	-2.03333	IFIT3;TOP2B;ANXA1;RAP1A;NR4A3
SMAD1-18555785	7	610	0.0200573	0.0145021	0.00555525	0.247596	1.46765	-2.04877	MTDH;PLSCR1;CHEK2;APOE;FKBP10;PON2;LCAT
STAT4-19710469	23	1939	0.0659026	0.0460975	0.0198051	0.0576026	0.730075	-2.08377	PLSCR1;ETFB;SREBF1;SREBF2;2700060E02RIK;NUCB1;MAGOH;MRPL17;MRPL44;PSMA3;LAG3;NSMCE1;CTSD;MAD2L2;NDUFV2;1500015O10RIK;ATP2A2;ANXA1;A930024E05RIK;2410002F23RIK;ICOSL;PON2;TFPI
NACC1-18358816	13	769	0.0372493	0.0182821	0.0189672	0.0136655	0.486074	-2.08665	AAAS;PLSCR1;CWF19L2;CALU;GPC4;ENPP2;SLC30A1;NDUFV2;ADCY3;ADAMTS1;CD320;PHYH;ABCG2
SCL-19346495	6	252	0.017192	0.00599101	0.011201	0.0205443	0.550404	-2.13842	SLC7A10;FADS2;PKMYT1;RAP1A;LY86;MDGA1
RUNX1-20887958	19	1120	0.0544413	0.0266267	0.0278145	0.00313024	0.377538	-2.17713	FADS2;FADS1;ARPC3;HAX1;ITGA5;NSMCE1;GGNBP2;CTSD;SREBF2;NGLY1;FDFT1;TCN2;ANGPTL2;CDH5;ITPR2;PTGDS;PTGER3;CYP2J9;TGFBI
PHF8-20622854	25	1490	0.0716332	0.0354231	0.0362102	0.000865635	0.327536	-2.3098	CTBS;SLC16A1;ETFA;GTF3C6;NOP56;NDUFA9;EIF3E;NUDT2;GGNBP2;CALU;FKBP10;EXOSC7;TTC3;LOXL3;NGLY1;TTC17;PHB2;MTDH;AGA;EIF2B5;POLR3H;TOP2B;LMLN;COPB2;ATP6V1H
STAT6-20620947	8	508	0.0229226	0.0120771	0.0108455	0.06516	0.850276	-2.32203	CHST11;RAP1A;LY86;NSMCE1;SELPLG;COPB1;DARS;SGSH
POU5F1-16153702	9	622	0.025788	0.0147873	0.0110006	0.079003	0.917756	-2.32951	PSMA3;OLFML3;LBP;SEMA3A;ST8SIA4;C1QA;ENPP2;SLC30A1;NR4A3
EGR1-19032775	6	276	0.017192	0.00656159	0.0106304	0.0299983	0.665702	-2.33436	BLZF1;ATP5H;MYOC;MRPS30;ITGA5;PRCP
TCF4-18268006	7	470	0.0200573	0.0111737	0.00888359	0.10098	1.02284	-2.34519	AGT;SNX7;PTGER3;LOXL3;LTBP1;HRH1;TFPI
GATA1-19941826	12	967	0.034384	0.0229893	0.0113946	0.112571	1.10494	-2.41337	UROD;SLC14A1;ETFA;PTPRF;YIF1B;PNPLA6;NNMT;NDUFV2;CHST11;SERPINH1;ACSL6;LTBP1
GATA2-20887958	28	1708	0.0802292	0.0406058	0.0396235	0.000610385	0.32619	-2.41427	ORAI1;BTBD17;PLSCR2;FADS1;FBXO10;ETFB;ITGA5;APOE;SREBF2;H2-AA;P4HA2;C1QA;PTGER3;F3;SLC29A4;DSP;PRCP;NSMCE1;SLC30A1;VIT;GPLD1;TINAGL1;SLC2A12;CDH5;ITPR2;CHEK2;TMEM143;ABCG2
RUNX1-17652178	15	1003	0.0429799	0.0238452	0.0191348	0.0226083	0.638534	-2.41968	PSMA3;GRIA2;VPS13A;ST8SIA4;GPC5;PRDM5;GRM3;ANXA1;SCRG1;ADAMTS1;TRPC6;ANTXR1;IFIT3;PTGDS;BLZF1
YY1-21170310	9	464	0.025788	0.0110311	0.0147569	0.0172756	0.59621	-2.41969	PHB2;EIF2B5;FUZ;P4HA2;NSMCE4A;GTF3C6;MDGA1;PNPLA6;YARS2
RNF2-18974828	21	1300	0.0601719	0.030906	0.0292659	0.00339595	0.426717	-2.42596	GRIN2C;WNT7A;SLC16A2;SMO;PTPRZ1;MDGA1;ARSB;CACHD1;HTRA1;CACNA1E;INHBB;RXFP3;BCAN;ADCY9;BACE2;P4HA2;ADAMTS1;RYR2;PTGER3;GDF10;TGFB2
EZH2-18974828	21	1300	0.0601719	0.030906	0.0292659	0.00339595	0.426717	-2.42596	GRIN2C;WNT7A;SLC16A2;SMO;PTPRZ1;MDGA1;ARSB;CACHD1;HTRA1;CACNA1E;INHBB;RXFP3;BCAN;ADCY9;BACE2;P4HA2;ADAMTS1;RYR2;PTGER3;GDF10;TGFB2
TCF3-18692474	14	1351	0.0401146	0.0321185	0.00799612	0.237123	1.72897	-2.4883	ARL2;PKMYT1;ITGB5;MDGA1;CWF19L2;GPC4;CACHD1;NDUFV2;RCN1;SERPINH1;COPS5;CRYZL1;C1QA;PDIA6
CDX2-19796622	5	334	0.0143266	0.00794047	0.00638618	0.149164	1.30876	-2.49019	PLA2G7;SNX7;ERO1L;SCARA3;THBS4
POU5F1-18358816	9	753	0.025788	0.0179017	0.00788625	0.179316	1.45331	-2.49766	PLSCR1;CWF19L2;APOE;RAB33A;PTGER3;KBTBD3;TMEM143;ENPP2;SLC30A1
GATA3-20176728	13	834	0.0372493	0.0198274	0.0174219	0.0244013	0.675658	-2.5088	PLA2G7;PSMB6;RAP1A;SREBF2;MFGE8;NNMT;LAMB2;WDR45;VTN;P4HA2;CHEK2;RYR2;TMEM143
SMAD4-19686287	7	405	0.0200573	0.00962841	0.0104289	0.0554924	0.873961	-2.52707	MRPL15;TINAGL1;ANXA1;SLC16A1;GSS;ETFA;SREBF1
TRP63-18441228	2	143	0.00573066	0.00339966	0.002331	0.335308	2.33288	-2.54915	SMO;VCAM1
MYC-18555785	19	1200	0.0544413	0.0285286	0.0259126	0.00637721	0.505619	-2.55592	F3;HAX1;HSD17B12;DHODH;SNRPD1;EIF2A;EXOSC7;PRDM5;YARS2;TIMM50;ATP2A2;VPS35;LSG1;CD320;SLC20A2;KBTBD3;RSL1D1;DARS;PPP2R3C
HOXD13-18407260	3	196	0.00859599	0.00465968	0.00393631	0.225763	1.73722	-2.58545	RAB33A;ANAPC4;ESD
HIF1A-21447827	6	321	0.017192	0.00763141	0.00956057	0.054527	0.889991	-2.58904	BACE2;ILVBL;DARS;P4HA2;DSP;ITGA5
THAP11-20581084	11	864	0.0315186	0.0205406	0.010978	0.110193	1.17509	-2.59169	MRPL44;PSMA2;TMEM74;SLC27A1;CCDC126;ACAD8;SEC61A1;IFT88;9130401M01RIK;CRYZL1;NKIRAS1
GATA2-19941826	32	2410	0.0916905	0.057295	0.0343955	0.00669229	0.518417	-2.59561	MPPE1;FADS2;UROD;SLC14A1;ITGA8;SREBF2;SELPLG;YIF1B;NNMT;COPS5;P4HA2;CSPG4;ANGPT1;HEPH;SND1;F3;HSD17B12;CNNM3;HFE2;PCSK6;PTPRF;EXOSC7;FAM58B;NDUFV2;ATP2A2;BLVRA;CHST11;SERPINH1;ACSL6;RAB33A;LTBP1;TGFB2
ESR2-21235772	6	424	0.017192	0.0100801	0.00711186	0.145679	1.35386	-2.60801	GRAMD1A;ITGA5;PCSK6;CTSD;PTGER3;TGFB2
BMI1-19503595	9	661	0.025788	0.0157145	0.0100734	0.104203	1.16704	-2.63916	SERPINE2;SULT1A1;TNKS1BP1;ARPC3;MLC1;BLZF1;CD320;RYR2;MFSD8
ERG-21242973	6	321	0.017192	0.00763141	0.00956057	0.054527	0.907259	-2.63927	GRIN2C;TINAGL1;PCSK6;PTGER3;SLC27A3;ELFN2
STAT3-19079543	14	948	0.0401146	0.0225376	0.017577	0.02957	0.758966	-2.67232	GRIA2;SLC14A1;NSMCE1;CCDC80;SLC30A1;HTRA1;SEC61A1;2410002F23RIK;COL8A2;RYR2;GDF10;EPHX1;COQ7;USP30
SALL4-18804426_ESC	14	1065	0.0401146	0.0253192	0.0147954	0.0645889	0.997654	-2.73329	PLA2G7;SNX13;FADS2;CNNM3;CALU;GPC4;ENPP2;HTRA1;ATP2A2;RCN1;VIT;SLC2A13;ANGPT1;TOP2B
MYCN-19997598	4	234	0.0114613	0.00556308	0.00589823	0.134174	1.37186	-2.75554	C4B;MED6;TGFBI;SGSH
TBX3-20139965	16	1068	0.0458453	0.0253905	0.0204548	0.0186606	0.696421	-2.77269	FAT1;KCNH1;LY86;GPC4;PRDM5;LOXL1;ATP2A2;BACE2;ITPR2;COPS5;RFC3;THSD4;PDIA6;ILVBL;LTBP1;DTWD1
NOTCH1-17114293	2	134	0.00573066	0.0031857	0.00254496	0.308208	2.39335	-2.81693	ARL6;ACAD8
REST-18959480	33	2868	0.0945559	0.0681834	0.0263724	0.0377845	0.863744	-2.8295	FADS2;FADS1;KCNH1;GRIA2;ETFB;VPS13A;YIF1A;TTC8;CACNA1E;BCAN;ADCY9;THNSL1;C1QA;MRPL17;GRIN2C;GLRA3;ADCYAP1;HSD17B12;FKBP10;PCSK1;AKR1B3;PTPRF;INHBB;EDA;ACE;LSG1;ITPR2;STRA6;ACSL6;RYR2;APLP1;ABCG2;ATP6V1H
NANOG-18347094	28	1908	0.0802292	0.0453605	0.0348687	0.0029911	0.49952	-2.90327	SNX13;PLSCR1;SLC27A3;PKMYT1;ITGB5;CALU;HIBADH;CACHD1;LOXL3;YARS2;ENPP2;GRAMD1A;KBTBD3;MCTS1;SLC16A2;HAX1;PTPRZ1;GPC4;ATP2A2;RCN1;VIT;STRA6;CYP4F13;SEMA3D;KCNJ16;CHEK2;CRYZL1;TFPI
ZNF263-19887448	1	71	0.00286533	0.00168794	0.00117739	0.448672	3.63909	-2.9166	PTPRF
EWS-FLI1-20517297	8	574	0.0229226	0.0136462	0.00927644	0.109963	1.33724	-2.95209	OLFML3;ETFB;EIF3E;MDGA1;ATP5S;SELPLG;TGFBI;LGALS3BP
ESR1-21235772	4	228	0.0114613	0.00542044	0.00604088	0.125559	1.43747	-2.98272	PCSK6;CTSD;GRAMD1A;TGFBI
TP53-20018659	13	1123	0.0372493	0.026698	0.0105512	0.147163	1.56856	-3.0057	AAAS;SLC27A3;CTSD;SREBF1;CACHD1;HTRA1;LGALS3BP;SERPINE2;BCAN;ANGPTL2;PTGER3;TGFB2;EPHX1
TCF3-18347094	32	2221	0.0916905	0.0528017	0.0388888	0.00203838	0.489763	-3.03437	SNX13;PLSCR1;GRIA2;PKMYT1;CWF19L2;MFGE8;CACHD1;ENPP2;GRAMD1A;THSD4;TMEM74;ARL2;HAX1;PRCP;PTPRZ1;GPC4;MAD2L2;RCN1;SERPINH1;SLC2A12;AGA;STRA6;CYP4F13;CHEK2;ACSL6;CRYZL1;COL8A2;FOLH1;ILVBL;NR4A3;TGFBI;TFPI
MYB-21317192	11	923	0.0315186	0.0219433	0.00957535	0.150952	1.62528	-3.07307	PLSCR1;SLC27A3;ETFB;GTF3C6;LRP4;ST8SIA4;ARSB;VCAM1;ADCY9;ESD;SLC20A2
MYC-19079543	20	1458	0.0573066	0.0346623	0.0226443	0.0214539	0.811809	-3.11885	PLSCR1;PSMB6;SLITRK3;DHODH;OSGEP;POLA2;CALU;PTPRF;YIF1B;TIMM50;LGALS3BP;MTDH;TMEM132A;2410002F23RIK;PARP2;SLC20A2;RSL1D1;DARS;COQ7;ATP5G3
DNAJC2-21179169	14	899	0.0401146	0.0213727	0.0187419	0.0201216	0.801097	-3.12905	KANK2;FADS1;SMO;FUZ;ARPC3;FKBP10;BCAN;IFT88;ACE;GRAMD1A;MFAP2;SLC11A2;TOP2B;PON2
KLF4-18358816	18	1700	0.0515759	0.0404156	0.0111604	0.177453	1.8727	-3.23798	NRD1;ETFB;HTR5B;EIF2A;APOE;CALU;HTRA1;ADPRH;COPS5;CSPG4;TMEM74;DHODH;MAD2L2;SLC30A1;RCN1;CYP4F13;CRYZL1;RDH5
NANOG-18358816	17	1232	0.0487106	0.0292894	0.0194212	0.0308594	1.00066	-3.48062	AAAS;MCTS1;PLSCR1;KCNE2;PKMYT1;GPC4;YARS2;CACNA1E;RCN1;BLVRA;RXFP3;GABRG1;EIF2B5;CHEK2;KBTBD3;ABCG2;TFPI
NR0B1-18358816	25	1691	0.0716332	0.0402016	0.0314316	0.00449467	0.657607	-3.55428	PLSCR1;ETFA;APOE;CALU;SREBF2;PITPNM1;TCN2;PLXNB1;C1QA;LMLN;PHYH;ATP5G3;ERO1L;GPC4;NDUFV2;ATP2A2;RCN1;BLVRA;ABHD3;CYP4F13;RYR2;ATP6V0C;TMEM143;ABCG2;TFPI
FLI1-21571218	88	5834	0.252149	0.138697	0.113452	1.58506e-08	0.199761	-3.58771	ORAI1;MPPE1;PRPSAP2;FADS2;FADS1;ETFA;VPS13A;CWF19L2;POLA2;TTC19;TTC17;BCAN;COPS5;MCM8;CRNKL1;SCFD1;COPB2;DARS;MFSD8;IQCC;SND1;AAAS;GLRA3;ARL6;MRPL2;LRP5;HSD17B12;MDGA1;NSMCE1;MMADHC;OSGEP;PCSK6;ATP2A2;RCN1;MED6;LSG1;CSF1R;ACSL6;PACRG;SLC20A2;LTBP1;FAT1;MED23;SLC27A3;ARPC3;ITGB5;ITGA5;SNRPD1;GGNBP2;AIMP1;CALU;MFGE8;LOXL1;VCAM1;NGLY1;TMEM209;PHB2;GRAMD1A;FCGRT;EIF2B5;ANGPT1;MAGOH;BLZF1;PHYH;MRPL44;…
ERG-20517297	16	1062	0.0458453	0.0252478	0.0205974	0.0178232	0.891756	-3.59133	PSMA4;PSMA2;ARL2;POLA2;CALU;PITPNM1;ENPP2;NGLY1;GPLD1;BACE2;NUCB1;ANGPT1;ANTXR1;CRYZL1;NKIRAS1;ATP6V1H
CNOT3-19339689	20	1547	0.0573066	0.0367782	0.0205284	0.0363218	1.12403	-3.72653	MPPE1;SMO;SREBF1;YARS2;TIMM50;VPS35;MTDH;CD320;LMLN;THBS4;AAAS;PSMA3;PSMA4;PSMA2;PSMC2;FKBP10;AKR1B3;VTN;SLC11A2;CIB1
GATA2-21571218	16	1111	0.0458453	0.0264128	0.0194325	0.0255751	1.03096	-3.77963	PRPSAP2;FADS2;SLC27A3;ITGB5;ITGA8;SNRPD1;PCSK6;PTPRF;CHST11;TMEM173;SEMA3D;ACSL6;RAB33A;GDF10;ATP5G3;SGSH
EWS-ERG-20517297	17	1038	0.0487106	0.0246773	0.0240333	0.00704143	0.771166	-3.82186	PSMA4;TMEM74;NSMCE4A;OSGIN2;POLA2;SCARA3;SLC30A1;SLC2A13;ANGPT1;ANTXR1;IFIT3;MAGOH;TMEM143;TGFBI;MFSD8;DTWD1;PPP2R3C
SOX2-18692474	45	3319	0.12894	0.0789055	0.0500344	0.000893821	0.548669	-3.85166	SNX13;PLSCR1;UROD;PKMYT1;CWF19L2;APOE;CACHD1;NNMT;CFH;FDFT1;COPS5;MCTS1;SLC16A1;SLC16A2;ARL6;PTPRZ1;MDGA1;ACAD8;ATP2A2;RCN1;VIT;DNASE2A;SLC20A2;SULT1A1;FUZ;ITGA5;SREBF2;YARS2;GRAMD1A;ANGPT1;MAGOH;PHYH;PSMD1;HAT1;PRCP;ATP5S;ATP5H;PTPRF;GPC4;NDUFV2;SERPINH1;CRYZL1;PDIA6;ABCG2;TFPI
GABP-19822575	41	2639	0.117479	0.0627392	0.0547393	0.000104673	0.424021	-3.88602	MED23;FADS1;ARPC3;VPS13A;POLA2;CALU;SREBF1;PITPNM1;TTC17;PHB2;WDR45;GSS;MCM8;POLR3H;VPS45;MAGOH;SCFD1;CD320;COPB2;COQ7;PPP2R3C;MRPL17;MRPL15;AAAS;MRPL44;SLC16A1;HAT1;NSMCE4A;HSD17B10;NSMCE1;ATP5H;ARSB;SEC61A2;NUP37;LSG1;ATP6V0C;SLC20A2;RSL1D1;TMEM143;ILVBL;USP30
KLF4-19030024	18	1502	0.0515759	0.0357083	0.0158676	0.0798559	1.57565	-3.9825	HAT1;VPS13A;ITGA8;ITGA5;APOE;SREBF1;PNPLA6;PRLR;INHBB;RCN1;SERPINE2;TCN2;BACE2;PLXNB1;COL8A2;PHYH;TGFB2;COQ7
TCFCP2L1-18555785	22	1987	0.0630372	0.0472387	0.0157986	0.10746	1.79178	-3.99682	SLC27A1;ITGB5;ITGA5;NUDT2;EIF2A;YARS2;HTRA1;TIMM50;ANGPTL2;FCGRT;4833420G17RIK;PTGER3;COPB1;MRPL17;PSMB6;ARL6;PAQR6;CTSD;ACAD8;RCN1;CYP4F13;RYR2
ZFP281-18757296	26	2004	0.0744986	0.0476428	0.0268557	0.0179625	1.00998	-4.05959	SLC27A1;FADS2;NRD1;ITGA5;GGNBP2;APOE;SREBF2;MFGE8;CACHD1;WDR45;OLFML3;FCGRT;9130401M01RIK;ADAMTS1;TOP2B;ATP5G3;SLC29A4;LRP5;FKBP10;PTPRF;CTSD;INHBB;SERPINH1;2410002F23RIK;RDH5;TMEM143
SETDB1-19884255	24	2020	0.0687679	0.0480232	0.0207447	0.0524597	1.37981	-4.06727	LOXL1;2700060E02RIK;GRAMD1A;ADCY3;OLFML3;THNSL1;COPS5;MFAP2;SCFD1;ATP5G3;MFSD8;PSMB6;PAQR6;ATP5S;FKBP10;ACAD8;MAD2L2;LAMB2;MED6;TNKS1BP1;APLP1;ILVBL;PON2;LCAT
TFAP2C-20629094	18	1203	0.0515759	0.0286	0.022976	0.0132333	0.958665	-4.14625	MRPL15;BGN;KCNE2;LY86;DSP;HSD17B12;OSGIN2;PTPRF;TTC8;PRLR;BCAN;ADCY9;TINAGL1;BACE2;GRAMD1A;P4HA2;CHEK2;STOM
DMRT1-21621532	4	132	0.0114613	0.00313815	0.00832317	0.0263572	1.1454	-4.16469	MRPL2;VPS13A;ICOSL;ZFP354B
CIITA-18437201	1	59	0.00286533	0.00140266	0.00146267	0.39111	4.49215	-4.21708	PSMA2
SCL-21571218	28	1784	0.0802292	0.0424126	0.0378167	0.00116211	0.631918	-4.2702	MPPE1;FADS2;RAP1A;SLC14A1;ITGB5;MFGE8;TMEM176A;PRDM5;ADCY3;CSPG4;HEPH;CDH19;OSGEP;PCSK6;EXOSC7;GPC5;FAM58B;SCARA3;CHST11;SERPINH1;CSF1R;ITPR2;PTGDS;ACSL6;RAB33A;LTBP1;NR4A3;EGFL6
CDKN2AIP-20523734	4	123	0.0114613	0.00292419	0.00853713	0.021144	1.11647	-4.30555	CDH5;COPS5;GDF10;TM9SF1
PRDM14-21183938	26	1944	0.0744986	0.0462164	0.0282822	0.0127679	1.28982	-5.62468	FAT1;LY86;ITGA5;GGNBP2;SREBF2;YARS2;NIPSNAP3B;ADPRH;GRAMD1A;TOP2B;DARS;DSP;ERAP1;MDGA1;PTPRF;CTSD;FAM58B;SLC30A1;INHBB;FCRLS;STRA6;SEMA3D;KCNJ16;CHAC2;PACRG;SLC20A2
AR-20517297	30	2047	0.0859599	0.0486651	0.0372948	0.0021866	0.981707	-6.01335	BTBD17;MED23;SLC14A1;ETFA;CWF19L2;POLA2;YIF1B;LOXL1;ENPP2;NNMT;NGLY1;TRPC6;COQ7;MRPL44;PSMA4;GLRA3;LRP5;ERAP1;PTPRF;INHBB;CHST11;AGA;AGT;CDH5;STRA6;SEMA3D;CRYZL1;SLC20A2;ATP6V1H;SGSH
TP63-17297297	1	40	0.00286533	0.000950955	0.00191437	0.287473	5.02915	-6.26948	ITGA5
EGR1-19374776	2	68	0.00573066	0.00161662	0.00411404	0.113382	2.89227	-6.29645	PLSCR1;HAX1

## Sheet: SuppData3 E2K magenta.results_k
Kinase	Substrates in Input	Substrates in Database	Input Fraction	Database Fraction	Difference	P-value	Z-score	Combined Score	Substrates
MAPK1	50	312	0.26455	0.0688286	0.195722	7.96381e-16	-2.2592	78.5445	RB1;STMN1;MED1;PRKCD;AR;EWSR1;TP53;GATA4;JUN;CREBBP;JUND;NR0B2;CDKN1A;NCOA1;SREBF1;NCOA2;PARP1;NCOA6;NCOA3;SREBF2;VAV1;PPARG;RXRA;CDX2;STAT1;ARID4B;EP300;GTF2I;CCNE1;FOXO1;SMAD2;SMAD4;SMAD3;ESR1;SP1;CDK2;SP3;GSK3B;ARRB1;MYBL2;RBL1;HDAC4;CEBPA;CEBPB;MAPK8;E2F1;MAPK1;SNCG;MAPK14;PML
GSK3B	59	600	0.312169	0.132363	0.179807	3.70058e-10	-2.21803	48.1698	RB1;SPIB;STMN1;PSMD1;AR;PPARGC1A;JUN;JUND;SNAI1;CDKN1A;MED14;SIRT1;NCOR2;NCOR1;PPARG;STAT1;DNMT1;CUL3;FOXO1;ABL1;NFKB1;NFKB2;MDM2;NFE2L2;HDAC4;CEBPA;CEBPB;CEBPE;E2F1;DUT;JMJD1C;KAT5;CHEK2;SMARCC2;TP53;TP53BP1;BRCA1;NCOA1;SREBF1;NCOA3;RXRA;MAP4K4;CDX2;CTNNB1;ARID4B;CCNE1;SMAD2;SMAD4;HMGA1;ESR1;KDM5A;GSK3B;MYBL2;AXIN2;CREB1;RBL1;LEF1;MAPK8;TAF2
MAPK3	35	251	0.185185	0.0553717	0.129813	1.18392e-09	-2.1817	44.8437	SPIB;STMN1;MED1;PRKCD;AR;EWSR1;TP53;GATA4;PPARGC1A;JUN;JUND;NR0B2;NCOA1;SREBF1;NCOA2;SREBF2;RXRA;STAT1;GTF2I;SMAD2;SMAD4;ESR1;SP1;CDK2;SP3;KDM5A;GSK3B;ARRB1;HDAC4;CEBPA;CEBPB;MAPK8;SNCG;MAPK14;PML
CDK1	52	567	0.275132	0.125083	0.15005	5.64373e-08	-2.03464	33.9584	RB1;SPIB;STMN1;MED1;AR;PPARGC1A;JUND;EZH2;CDKN1A;SETD8;SIRT1;NCOR2;DNMT1;FOXO1;ABL1;CDK7;CDK1;MDM4;CEBPA;CEBPB;E2F1;E2F4;DUT;CDC20;KAT5;CHEK2;SMARCC2;TP53;TP53BP1;CDT1;GADD45B;GADD45A;GADD45G;BRCA1;NCOA1;SREBF1;NCOA3;TUBB;RXRA;MAP4K4;HNRNPUL1;CCNE1;HMGA1;ESR1;KDM5A;MYBL2;HIST1H1A;CCNA2;CCNA1;LEF1;MAPK8;TAF2
CDK2	53	606	0.280423	0.133686	0.146737	1.76568e-07	-1.98526	30.87	RB1;STMN1;PSMD1;MED1;-;PPARGC1A;CREBBP;JUN;EZH2;CDKN1A;NCOR1;CTDP1;BRD4;GTF2I;FOXO1;CDK7;CDK2;MDM2;CEBPA;CEBPB;E2F1;DUT;SKP2;TP53;TP53BP1;CDT1;SETDB1;UBXN1;BRCA1;NCOA1;DBNL;RXRA;NPDC1;CDX2;ARID4A;ARID4B;EP300;HNRNPUL1;CCNE1;SMAD2;SMAD4;SMAD3;HMGA1;ESR1;KDM5A;CHD7;MYBL2;TOPBP1;HIST1H1A;CCNA2;CCNA1;RBL1;ELF4
HIPK2	14	43	0.0740741	0.00948599	0.0645881	2.83943e-08	-1.73936	30.2249	CUL1;EP300;NKX2-5;SMAD2;CREBBP;UBE2I;CBX4;HMGA1;RANBP9;PML;KAT2B;CREB1;MDM2;TP53
MAPK8	32	275	0.169312	0.0606662	0.108646	3.28684e-07	-1.93428	28.8753	SPIB;CHEK2;STMN1;SMARCC2;AR;EWSR1;TP53;TP53BP1;JUN;JUND;CDKN1A;NCOA3;SIRT1;PPARG;RXRA;MAP4K4;CDKN2A;STAT1;CTNNB1;CUL3;ABL1;SMAD2;SMAD4;SMAD3;ESR1;SP1;CEBPB;CEBPE;LEF1;MAPK1;SNCG;MAPK14
CDK9	13	38	0.0687831	0.00838297	0.0604001	5.61205e-08	-1.6469	27.4962	RB1;CUL1;NR2E3;SERPINH1;MYBL2;SKP2;HIST1H1A;SMAD3;NFKB1;AR;MED21;PPARG;TP53
TAF1	13	42	0.0687831	0.00926539	0.0595177	1.48474e-07	-1.65743	26.0595	RB1;GTF2A1;JUN;TBP;EDF1;CCNA2;RBL1;CREB1;EWSR1;SUB1;MDM2;TP53;TAF2
ATM	24	177	0.126984	0.039047	0.0879371	1.03019e-06	-1.8578	25.6112	TRIM28;KAT5;CHEK2;EP300;MED1;SMARCC2;EWSR1;TP53;ABL1;TP53BP1;JUN;HMGA1;NFKB2;SP1;MDM2;ATM;MDM4;NFE2L2;BRCA1;TOPBP1;CREB1;E2F1;RAD50;CTNNB1
CSNK2A1	46	521	0.243386	0.114935	0.128451	1.18091e-06	-1.79337	24.478	SPIB;STMN1;NKX2-5;CREBBP;JUN;SNAI1;CDKN1A;SIRT1;NCOR2;PPARG;CTDP1;STAT1;PIAS1;NFKB1;SP1;CDK1;MDM2;HSP90AB1;GTF2A1;HDAC3;HDAC1;PML;RAD50;SUB1;TRIM16;TP53;TP53BP1;SETDB1;SMARCA4;BRCA1;SUZ12;CTNNB1;ARID4A;CACNA1A;PRNP;HMGA1;ESR1;NFKBIB;YWHAQ;MYBL2;CREB1;LEF1;TGS1;MAPK1;ARID3A;MAPK14
CHUK	17	90	0.0899471	0.0198544	0.0700927	8.27571e-07	-1.71921	24.0772	HSP90AB1;ARRB1;NCOA3;TUBB;TUBA4A;PIAS1;NCOR2;NCOR1;TP53;CUL1;NR2C2;CREBBP;ESR1;NFKB1;NFKB2;CTNNB1;NFKBIB
MAPK14	41	461	0.216931	0.101699	0.115233	4.46585e-06	-1.87492	23.0972	RB1;SPIB;STMN1;PSMD1;MED1;AR;EWSR1;PPARGC1A;JUN;JUND;EZH2;CDKN1A;SIRT1;NCOR1;PPARG;BRD4;STAT1;FOXO1;ARRB1;E2F1;PML;TP53;GADD45A;ATR;HNF4A;NCOA1;NCOA2;NCOA3;CDX2;ARID4B;CCNE1;SMAD3;ESR1;KDM5A;CASP3;MYBL2;CREB1;RBL1;MAPK1;MAPK14;TAF2
AKT1	28	256	0.148148	0.0564747	0.0916734	5.98014e-06	-1.80458	21.7038	SMARCC2;AR;PRKD2;FOXG1;TP53BP1;PPARGC1A;PPARGC1B;CREBBP;EZH2;CDKN1A;BRCA1;STAT1;CTNNB1;EP300;DNMT1;FOXO1;SMAD2;SMAD4;SMAD3;ESR1;CDK2;MDM2;MDM4;GSK3B;HSP90AB1;CASP3;TOPBP1;CREB1
ATR	13	63	0.0687831	0.0138981	0.054885	7.44575e-06	-1.23341	14.564	BRCA1;CHEK2;SMARCC2;CREB1;EWSR1;TP53;E2F1;CDKN2A;PML;SP1;MDM2;ATM;ATR
ABL1	19	151	0.100529	0.0333113	0.0672178	3.85037e-05	-1.38427	14.0708	RB1;EP300;PRKCD;TP53;ABL1;TP53BP1;JUN;ESR1;MDM2;MDM4;ATR;BRCA1;YWHAQ;NCOA3;VAV1;DDB2;CREB1;CEBPB;CTNNB1
CDK7	10	31	0.0529101	0.00683874	0.0460713	3.15995e-06	-1.06659	13.5083	BRCA1;E2F1;GTF2H1;ESR1;AR;CDK7;CDK2;CDK1;MNAT1;TP53
CDK4	11	51	0.0582011	0.0112508	0.0469502	2.6848e-05	-1.20497	12.6826	RB1;CDKN1A;BRCA1;NCOA2;WDR77;RBL1;CEBPA;SMAD2;SMAD3;SETDB1;CDKN2A
PRKDC	23	227	0.121693	0.0500772	0.0716159	0.000129731	-1.25068	11.1936	CHEK2;PRKCD;TP53;TP53BP1;JUN;ATM;BRCA1;PARP1;NCOA6;CTDP1;SVIL;ABL1;HMGA1;NFKB1;NFKB2;SP1;MDM2;NFE2L2;HSP90AB1;CASP3;MAPK8;E2F1;RAD50
RPS6KA3	28	365	0.148148	0.0805206	0.0676275	0.00169705	-1.03716	6.61593	TRRAP;TRIM28;STMN1;SMARCC2;AR;PRKD2;TP53;ATF4;CREBBP;GRIN2B;CDKN1A;XPO1;HNF4A;CTDP1;WT1;FOXO1;SMAD2;SMAD3;ESR1;CDK1;MDM2;GSK3B;CREB1;HDAC4;CEBPB;E2F1;MAPK1;TAF2
MAPK9	16	162	0.0846561	0.0357379	0.0489182	0.00183491	-0.864994	5.45012	RB1;CDC20;KAT5;STMN1;TP53;DNMT1;SMAD2;JUN;JUND;SMAD3;HMGA1;DBNL;MAPK8;RXRA;MAP4K4;CTNNB1
PRKD1	9	54	0.047619	0.0119126	0.0357064	0.000792201	-0.756121	5.39923	YWHAQ;CREB1;PRKD2;MAPK8;ABL1;TFAP2A;JUN;SNAI1;CTNNB1
IKBKB	11	87	0.0582011	0.0191926	0.0390085	0.00168024	-0.813081	5.19462	HSP90AB1;PARP1;NCOA3;TUBB;TUBA4A;NR2C2;CDKN2A;NFKB1;NFKB2;CTNNB1;NFKBIB
CHEK2	9	41	0.047619	0.00904478	0.0385743	0.000131499	-0.487691	4.35825	RB1;BRCA1;CHEK2;E2F1;HIST1H1C;PML;MDM2;MDM4;TP53
MAP3K8	8	54	0.042328	0.0119126	0.0304154	0.00300221	-0.421397	2.44764	HSP90AB1;TUBA4A;CREB1;ABL1;MAPK1;NFKB1;NFKB2;CDK1
CSNK1D	10	85	0.0529101	0.0187514	0.0341587	0.00434822	-0.368643	2.00468	SPIB;YWHAQ;NCOA3;RBL1;SUB1;PRKD2;TP53;DNMT1;MDM2;CTNNB1
CHEK1	7	35	0.037037	0.00772116	0.0293159	0.00120763	-0.246005	1.65293	RB1;CUL1;E2F1;E2F4;SMAD4;MDM4;TP53
PAK1	10	92	0.0529101	0.0202956	0.0326144	0.00719798	-0.252517	1.24591	STMN1;CASP1;PRKCD;FOXO1;ABL1;SMAD2;SMAD4;PA2G4;ESR1;SNAI1
GSK3A	7	44	0.037037	0.0097066	0.0273304	0.00382488	-0.119965	0.667751	CEBPA;FOXO1;JUN;CREB1;CCNE1;CTNNB1;TP53
CSNK2B	7	43	0.037037	0.00948599	0.027551	0.00341291	-0.061429	0.348928	CDKN1A;CTDP1;BRCA1;PRNP;ESR1;CTNNB1;TP53
NLK	7	14	0.037037	0.00308846	0.0339486	1.06315e-05	-0.0228923	0.262155	CREBBP;SMAD4;LEF1;CUL1;NLK;FOXO1;SKP2
CSNK1E	13	148	0.0687831	0.0326495	0.0361336	0.011736	-0.0520078	0.23118	CHEK2;PRKD2;TP53;DNMT1;ESR1;NFKB2;SNAI1;HSP90AB1;YWHAQ;AXIN2;GTF2A1;HDAC1;CTNNB1
CDK3	7	30	0.037037	0.00661813	0.0304189	0.000545919	0	0	RB1;CDKN1A;E2F1;JUN;CCNA2;TFDP1;CCNE1
AURKA	7	51	0.037037	0.0112508	0.0257862	0.00785176	0.149822	-0.72619	GSK3B;BRCA1;CDC20;STMN1;AR;TP53;PML
PDGFRB	1	62	0.00529101	0.0136775	-0.00838647	0.925044	10.349	-0.806333	STAT1
INSR	5	175	0.026455	0.0386058	-0.0121508	0.855383	9.02507	-1.40977	PHB;ABL1;SMAD2;HMGA1;VAV1
PRKG1	3	114	0.015873	0.0251489	-0.00927589	0.854839	9.00081	-1.41171	GTF2I;CREB1;MAP4K4
MAP3K14	4	145	0.021164	0.0319876	-0.0108236	0.855226	9.19327	-1.43773	TUBA4A;NFKB2;HSP90AB1;TUBB
FGFR1	1	50	0.00529101	0.0110302	-0.00573922	0.876882	11.3791	-1.49502	CREBBP
CDK6	6	25	0.031746	0.00551511	0.0262309	0.00121042	0.26839	-1.80272	RB1;CEBPA;CDKN1A;CDKN2A;AR;CTNNB1
DYRK1B	6	15	0.031746	0.00330907	0.028437	0.000124627	0.243633	-2.19031	CDKN1A;RANBP9;HNF1A;MAPK14;MAPK1;PCBD1
CAMK2D	6	35	0.031746	0.00772116	0.0240249	0.00530332	0.463271	-2.42727	HDAC4;CEBPB;SMAD4;STAT1;GRIN2B;CREB1
CASK	1	42	0.00529101	0.00926539	-0.00397438	0.828729	12.9813	-2.43869	PRKD2
PTK2	3	95	0.015873	0.0209574	-0.00508441	0.759313	9.10599	-2.50725	PIAS1;TP53;STAT1
JAK1	2	66	0.010582	0.0145599	-0.00397788	0.763724	10.4415	-2.8145	BRCA1;STAT1
TTK	6	14	0.031746	0.00308846	0.0286576	9.20568e-05	0.307926	-2.86159	TUBB;CHEK2;ABL1;E2F1;E2F4;TP53
RPS6KA1	8	75	0.042328	0.0165453	0.0257827	0.01718	0.735798	-2.99029	GSK3B;CREB1;CEBPB;MAPK1;CREBBP;ESR1;NR4A3;NFKBIB
MAP3K3	7	193	0.037037	0.0425767	-0.00553962	0.697526	8.52715	-3.07161	SMARCC2;BRCA1;TUBB;TUBA4A;UBC;HSP90AB1;YWHAQ
ERBB3	2	61	0.010582	0.0134569	-0.00287486	0.725424	9.8765	-3.17034	VAV1;PA2G4
MTOR	3	86	0.015873	0.018972	-0.00309897	0.698902	9.2992	-3.33139	YWHAQ;DNMT1;JUN
CAMK2G	6	40	0.031746	0.00882418	0.0229219	0.00936642	0.72314	-3.37751	CEBPB;SMAD4;SMAD3;STAT1;GRIN2B;CREB1
MAPKAPK2	6	40	0.031746	0.00882418	0.0229219	0.00936642	0.72956	-3.4075	NCOA1;MAPK14;ESR1;CREB1;MDM2;TP53
KIT	2	59	0.010582	0.0130157	-0.00243365	0.7087	9.95789	-3.42872	ABL1;STAT1
WEE1	6	18	0.031746	0.00397088	0.0277752	0.000279557	0.428542	-3.50646	SMAD3;CASP3;CDK2;CDK1;BRD8;SKP2
IKBKE	7	60	0.037037	0.0132363	0.0238008	0.0168095	0.86721	-3.54326	HSP90AB1;TUBB;TUBA4A;CUL1;STAT1;ESR1;NFKB1
YES1	1	36	0.00529101	0.00794176	-0.00265076	0.780698	15.0212	-3.71874	PRKCD
TRIM24	9	95	0.047619	0.0209574	0.0266616	0.0225575	1.02947	-3.90344	TRIM28;HNF4A;TRIM24;AR;RXRA;ESR1;PML;GADD45G;MNAT1
JAK3	1	35	0.00529101	0.00772116	-0.00243015	0.771481	15.3914	-3.9932	STAT1
CSNK2A2	18	267	0.0952381	0.0589014	0.0363367	0.0348972	1.21728	-4.08441	TRRAP;SPIB;TP53;CREBBP;JUN;PA2G4;CTDP1;MAP4K4;CTNNB1;PRNP;HMGA1;ESR1;SP1;CDK1;HSP90AB1;GTF2A1;HDAC1;TAF2
ITK	1	31	0.00529101	0.00683874	-0.00154773	0.730598	13.5783	-4.26213	SMAD4
HCK	3	77	0.015873	0.0169865	-0.00111353	0.627755	9.27584	-4.31888	ARRB1;VAV1;ABL1
CSNK1A1	9	99	0.047619	0.0218398	0.0257792	0.0280359	1.21954	-4.35897	PRKD2;TP53;FOXG1;FOXO1;MDM4;YWHAQ;CREB1;ARID3A;CTNNB1
EGFR	10	247	0.0529101	0.0544893	-0.00157925	0.584893	8.31356	-4.45878	AR;TRIP4;VAV1;STAT1;CTNNB1;TUBA4A;ESR1;CASP1;CEBPB;MAPK1
BMPR1B	3	77	0.015873	0.0169865	-0.00111353	0.627755	9.86011	-4.59092	UBXN1;-;SMAD2
CAMK4	5	25	0.026455	0.00551511	0.0209399	0.00613951	0.921524	-4.69333	HDAC4;STMN1;EP300;CREBBP;CREB1
LYN	6	144	0.031746	0.031767	-2.10099e-05	0.560785	8.19499	-4.74013	PRKCD;ABL1;CDK2;CDK1;CASP3;DBNL
RIPK3	4	95	0.021164	0.0209574	0.000206598	0.565024	8.57696	-4.89647	HSP90AB1;TUBB;TUBA4A;UBC
CSNK1G1	5	24	0.026455	0.00529451	0.0211605	0.00528446	0.93625	-4.90874	FOXO1;YWHAQ;TP53BP1;CTNNB1;TP53
PTK2B	3	70	0.015873	0.0154423	0.000430704	0.565021	8.71577	-4.97577	PRKCD;VAV1;EWSR1
MAPK11	5	27	0.026455	0.00595632	0.0204987	0.00813305	1.06679	-5.13322	HDAC3;HNF4A;E2F1;JUN;EWSR1
PKN1	1	30	0.00529101	0.00661813	-0.00132713	0.719288	15.8174	-5.21173	CASP3
PRKCD	11	146	0.0582011	0.0322083	0.0259928	0.0487729	1.73493	-5.24049	TRIM28;EP300;PRKCD;TP53;CREBBP;PA2G4;NFE2L2;GSK3B;MAPK8;MAPK1;STAT1
RPS6KB1	6	48	0.031746	0.010589	0.021157	0.0198578	1.35074	-5.29378	GSK3B;XPO1;MAPK1;ESR1;CDK1;MDM2
PRKD2	5	27	0.026455	0.00595632	0.0204987	0.00813305	1.12475	-5.41211	GRIP1;RXRA;XPO1;MTF2;PRKD2
PDPK1	2	48	0.010582	0.010589	-7.00332e-06	0.601282	10.6579	-5.4216	YWHAQ;PRKCD
TNK2	1	27	0.00529101	0.00595632	-0.000665315	0.682446	14.8103	-5.65859	AR
PRKACA	23	395	0.121693	0.0871388	0.0345544	0.07033	2.20251	-5.84669	RB1;STMN1;GATA4;PPARGC1A;NFE2;CREBBP;SNAI1;WT1;NFKB1;CEBPB;TP53;TP53BP1;SREBF1;NCOA3;RXRA;CTNNB1;EP300;CACNA1A;TFAP2A;ESR1;GSK3B;HIST1H1A;CREB1
PRKCB	17	283	0.0899471	0.0624311	0.027516	0.0901838	2.49897	-6.01229	RB1;TRRAP;STMN1;PRKD2;TP53;PA2G4;GRIN2B;NCOA6;CTNNB1;HNRNPUL1;HMGA1;NFKB2;SP4;GSK3B;HSP90AB1;CREB1;CEBPB
PKD1	1	27	0.00529101	0.00595632	-0.000665315	0.682446	16.0028	-6.11422	CTNNB1
PRKCQ	2	45	0.010582	0.0099272	0.00065481	0.567277	10.8453	-6.14825	CASP3;VAV1
SYK	4	85	0.021164	0.0187514	0.00241264	0.480277	8.42962	-6.18221	DBNL;TUBA4A;VAV1;STAT1
PRKCG	3	61	0.015873	0.0134569	0.00241614	0.475717	8.36941	-6.2179	GSK3B;PA2G4;GRIN2B
FGFR3	2	44	0.010582	0.0097066	0.000875415	0.55549	10.6943	-6.28722	STAT1;-
KDR	2	42	0.010582	0.00926539	0.00131662	0.531246	9.96124	-6.30079	STAT1;CTNNB1
MAPK10	9	121	0.047619	0.0266931	0.0209259	0.0751569	2.43588	-6.30449	JMJD1C;CDC20;STMN1;TP53;JUN;HMGA1;CEBPB;RXRA;CDKN2A
TRIM28	5	21	0.026455	0.00463269	0.0218223	0.00322605	1.1109	-6.37267	CEBPB;SETDB1;ESR1;TRIM28;SERTAD2
TGFBR1	11	166	0.0582011	0.0366203	0.0215807	0.0961356	2.72808	-6.38915	CLU;CDC20;-;SMAD2;SMAD4;SMAD3;UBXN1;ASH2L;STAT1;PML;CTNNB1
HIPK3	1	26	0.00529101	0.00573572	-0.000444711	0.669127	16.0933	-6.466	AR
FYN	14	216	0.0740741	0.0476506	0.0264235	0.0753078	2.51835	-6.51289	PRKCD;-;GRIN2B;VAV1;STAT1;CTNNB1;GTF2I;TUBA4A;ABL1;CDK2;CDK1;NFE2L2;CASP3;MAPK14
IGF1R	7	144	0.037037	0.031767	0.00527	0.400858	7.18824	-6.57111	GTF2I;PRKCD;UBC;ESR1;CDK1;MDM2;VAV1
SRC	20	346	0.10582	0.0763291	0.029491	0.0928571	2.79955	-6.65368	PRKCD;HNF1A;-;AR;EWSR1;TRIP4;GRIN2B;DBNL;VAV1;RXRA;STAT1;CTNNB1;GTF2I;FOXO1;ABL1;ESR1;CDK1;HSP90AB1;ARRB1;E2F4
PRKACB	6	120	0.031746	0.0264725	0.0052735	0.391749	7.23951	-6.78439	STMN1;GTF2I;TP53;SMAD2;SMAD3;GRIN2B
CDK5	7	103	0.037037	0.0227223	0.0143148	0.15021	3.58794	-6.80174	STMN1;TP53;ABL1;ATM;PPARG;PURA;CTNNB1
MAP3K7	8	102	0.042328	0.0225017	0.0198264	0.0723011	2.64477	-6.94758	TUBA4A;SMAD3;HSP90AB1;TUBB;HDAC4;MAPK8;NRIP1;E2F4
MAP3K1	9	139	0.047619	0.030664	0.016955	0.137289	3.50318	-6.95615	TUBA4A;UBC;UBE2I;ESR1;HSP90AB1;TUBB;MAPK8;MAPK1;MAP4K4
RAF1	7	84	0.037037	0.0185308	0.0185063	0.0707914	2.64377	-7.00076	RB1;PRKCD;-;VAV1;AR;PHB;MAPK1
ROCK1	2	44	0.010582	0.0097066	0.000875415	0.55549	11.9179	-7.00659	CASP3;SMAD2
TBK1	3	59	0.015873	0.0130157	0.00285735	0.454745	8.99381	-7.08728	HSP90AB1;TUBB;TUBA4A
LCK	8	161	0.042328	0.0355173	0.00681072	0.364686	7.07211	-7.13376	PRKCD;-;ABL1;ESR1;VAV1;MAPK1;STAT1;MAPK14
JAK2	5	92	0.026455	0.0202956	0.00615942	0.347379	6.92554	-7.32263	BRCA1;GTF2I;VAV1;MAPK1;STAT1
TTN	1	26	0.00529101	0.00573572	-0.000444711	0.669127	18.4176	-7.39986	FHL2
CAMK2B	5	32	0.026455	0.00705934	0.0193957	0.0149881	1.77181	-7.44249	CEBPB;STMN1;RXRG;GRIN2B;CREB1
PRKCA	24	487	0.126984	0.107434	0.0195498	0.229099	5.09145	-7.50275	PRKCD;AR;EWSR1;PRKD2;CREBBP;PA2G4;GRIN2B;CDKN1A;NR1I3;FOXO1;ABL1;NFE2L2;EDF1;E2F1;CHEK2;TP53;TP53BP1;BRCA1;EP300;SMAD3;ESR1;GSK3B;HIST1H1A;RBL1
PLK1	7	92	0.037037	0.0202956	0.0167414	0.100297	3.26858	-7.51648	YY1;CHEK2;TUBB;TUBA4A;TP53;MDM2;CTNNB1
PRKCE	4	70	0.021164	0.0154423	0.00572171	0.343875	7.12898	-7.61003	CREB1;PRKD2;NRIP1;MAPK1
NTRK1	2	39	0.010582	0.00860357	0.00197844	0.49324	10.8263	-7.65155	ABL1;-
ABL2	1	23	0.00529101	0.0050739	0.000217103	0.625741	16.3537	-7.66691	CEBPB
ERBB2	7	125	0.037037	0.0275756	0.00946148	0.276329	5.9729	-7.68212	ESR1;CDK1;NCOA3;VAV1;NCOR1;STAT1;CTNNB1
CAMK2A	6	105	0.031746	0.0231635	0.00858256	0.284117	6.11823	-7.69899	STMN1;SMAD2;SYT1;GRIN2B;CREB1;CEBPB
TRRAP	6	11	0.031746	0.00242665	0.0293194	3.25104e-05	0.748978	-7.7399	KAT2A;E2F1;BRD8;E2F4;BRCA1;ESR1
ACVR1	4	70	0.021164	0.0154423	0.00572171	0.343875	7.5865	-8.09842	UBXN1;RXRA;CREBBP;STAT1
BCR	5	48	0.026455	0.010589	0.015866	0.0593141	2.86705	-8.09916	YWHAQ;HNF1A;VAV1;TP53;ABL1
PRKCZ	7	104	0.037037	0.0229429	0.0140942	0.155247	4.40604	-8.20731	PRKCD;CREBBP;SP1;GSK3B;CASP3;NCOA3;MAPK1
BTK	5	59	0.026455	0.0130157	0.0134394	0.111704	3.88859	-8.52342	GTF2I;VAV1;EWSR1;TP53;ARID3A
IRAK1	2	39	0.010582	0.00860357	0.00197844	0.49324	12.3092	-8.69967	JUN;MAPK14
ZAP70	5	51	0.026455	0.0112508	0.0152042	0.071844	3.30609	-8.70579	DBNL;TUBB;TUBA4A;VAV1;MAPK14
PAK2	3	48	0.015873	0.010589	0.005284	0.334693	7.97172	-8.72539	CASP3;ABL1;JUN
SGK1	5	76	0.026455	0.0167659	0.00968909	0.222808	5.81783	-8.73514	GSK3B;CREB1;FOXO1;MAPK1;CTNNB1
RPS6KA5	5	37	0.026455	0.00816236	0.0182927	0.0249237	2.41618	-8.92037	CEBPB;EP300;CREBBP;STAT1;CREB1
RIPK2	5	48	0.026455	0.010589	0.015866	0.0593141	3.21426	-9.08	CASP1;TUBB;TUBA4A;SMAD4;UBE2I
AXL	1	21	0.00529101	0.00463269	0.000658312	0.59372	17.8098	-9.28509	RANBP9
BMPR2	2	38	0.010582	0.00838297	0.00219904	0.480148	12.705	-9.32112	TOPBP1;TUBB
MAP2K3	4	20	0.021164	0.00441209	0.0167519	0.0140885	2.23164	-9.51212	SMAD2;SMAD4;SMAD3;MAPK14
MAP3K5	5	40	0.026455	0.00882418	0.0176308	0.0325325	2.79467	-9.57318	CDKN1A;MAPK8;YWHAQ;GADD45B;MAPK14
RIPK1	4	54	0.021164	0.0119126	0.00925138	0.201211	5.97322	-9.57748	HSP90AB1;TUBB;TUBA4A;NFKB1
ADRBK1	4	56	0.021164	0.0123538	0.00881017	0.218109	6.29647	-9.588	ARRB1;PRKCD;MAPK14;MDM2
CSK	4	47	0.021164	0.0103684	0.0107956	0.145732	5.00178	-9.63335	RB1;ARRB1;CREBBP;CTNNB1
TGFBR2	5	37	0.026455	0.00816236	0.0182927	0.0249237	2.65831	-9.81433	CLU;SMAD4;SMAD3;PML;CTNNB1
AKT2	5	41	0.026455	0.00904478	0.0174102	0.0353576	2.99181	-9.99935	GSK3B;HSP90AB1;PPARGC1A;ESR1;CTNNB1
PRKCH	4	17	0.021164	0.00375028	0.0174137	0.00871212	2.13348	-10.1192	GSK3B;CCNE1;CDK2;PRKD2
EIF2AK2	4	42	0.021164	0.00926539	0.0118986	0.110488	4.79238	-10.5569	CASP3;STAT1;CDK1;TP53
MST1R	1	19	0.00529101	0.00419148	0.00109952	0.558974	18.1826	-10.5759	YWHAQ
AURKB	3	43	0.015873	0.00948599	0.00638702	0.279235	8.45912	-10.7913	RB1;STMN1;TP53
DYRK1A	4	22	0.021164	0.0048533	0.0163107	0.018629	2.7187	-10.8287	SIRT1;FOXO1;CREB1;TP53
PRKAA1	4	41	0.021164	0.00904478	0.0121192	0.103955	4.85068	-10.981	RB1;HNF4A;EP300;TP53
ALK	4	25	0.021164	0.00551511	0.0156489	0.0269749	3.04612	-11.0052	PRMT2;NCOA6;MDM2;TP53
TYK2	2	30	0.010582	0.00661813	0.00396388	0.368683	11.0589	-11.0348	STAT1;VAV1
MET	4	38	0.021164	0.00838297	0.0127811	0.0854813	4.50521	-11.0804	CASP3;RANBP9;VAV1;CTNNB1
PDK1	2	31	0.010582	0.00683874	0.00374327	0.38319	11.7932	-11.3123	YWHAQ;PRKCD
MAP2K1	4	39	0.021164	0.00860357	0.0125604	0.0914469	4.76196	-11.3906	GSK3B;MAPK1;EP300;MAPK14
RET	3	40	0.015873	0.00882418	0.00704884	0.246392	8.22197	-11.5176	MAPK8;MAPK1;MAPK14
PDGFRA	2	31	0.010582	0.00683874	0.00374327	0.38319	12.075	-11.5826	STAT1;PRKCD
MAP4K1	4	25	0.021164	0.00551511	0.0156489	0.0269749	3.21399	-11.6117	CASP3;ABL1;MAPK1;DBNL
RPS6KA2	4	21	0.021164	0.00463269	0.0165313	0.0162593	2.84169	-11.7052	GSK3B;ESR1;CREB1;MAPK1
MAPKAPK5	4	20	0.021164	0.00441209	0.0167519	0.0140885	2.80858	-11.9713	JUN;MAPK14;MAPK1;TP53
EPHB2	3	38	0.015873	0.00838297	0.00749005	0.22486	8.02465	-11.975	ABL1;GTF2I;GRIN2B
DAPK3	4	23	0.021164	0.0050739	0.0160901	0.0212023	3.14124	-12.1052	CDKN1A;MDM2;TP53;ATF4
PLK3	4	18	0.021164	0.00397088	0.0171931	0.0103213	2.64747	-12.1083	JUN;CHEK2;MAPK1;TP53
MAP2K4	4	23	0.021164	0.0050739	0.0160901	0.0212023	3.2442	-12.502	MAPK14;-;MAPK8;RXRA
CLK1	1	17	0.00529101	0.00375028	0.00154073	0.521274	19.8117	-12.9069	ABL1
PIK3CA	1	19	0.00529101	0.00419148	0.00109952	0.558974	22.3163	-12.9803	GRIN2B
TEC	2	25	0.010582	0.00551511	0.0050669	0.294499	10.9547	-13.3919	VAV1;TP53
FGFR4	1	18	0.00529101	0.00397088	0.00132013	0.540508	21.9786	-13.5222	STAT1
FER	1	16	0.00529101	0.00352967	0.00176133	0.501239	20.0667	-13.8596	CTNNB1
PRKG2	1	17	0.00529101	0.00375028	0.00154073	0.521274	22.6239	-14.739	CREB1
MAP3K4	3	21	0.015873	0.00463269	0.0112403	0.0689194	5.70801	-15.2679	GADD45B;GADD45A;GADD45G
FLT1	2	23	0.010582	0.0050739	0.00550811	0.264388	11.7485	-15.6295	STAT1;CTNNB1
CAMK1	2	24	0.010582	0.00529451	0.0052875	0.279454	12.404	-15.8141	EP300;CREB1
DAPK1	3	21	0.015873	0.00463269	0.0112403	0.0689194	5.92103	-15.8377	GRIN2B;MAPK1;TP53
STK11	3	32	0.015873	0.00705934	0.00881367	0.163103	8.91109	-16.1591	SMAD4;SMARCA4;TP53
BLK	1	16	0.00529101	0.00352967	0.00176133	0.501239	23.4881	-16.2226	DBNL
PIM1	3	27	0.015873	0.00595632	0.0099167	0.116482	7.77736	-16.7215	CDKN1A;SKP2;MDM2
MINK1	1	14	0.00529101	0.00308846	0.00220254	0.458632	21.731	-16.9395	MAPK14
NTRK3	2	19	0.010582	0.00419148	0.00639053	0.204428	10.9085	-17.3177	JUN;MAPK1
MAPK13	2	21	0.010582	0.00463269	0.00594932	0.234292	12.0091	-17.4274	SMAD4;STMN1
FGR	2	22	0.010582	0.0048533	0.00572871	0.249325	12.8323	-17.824	ARRB1;YWHAQ
BRAF	2	21	0.010582	0.00463269	0.00594932	0.234292	12.5761	-18.2503	YWHAQ;MAPK1
GRK5	2	19	0.010582	0.00419148	0.00639053	0.204428	11.5111	-18.2743	SNCG;TP53
DMPK	1	15	0.00529101	0.00330907	0.00198194	0.48037	25.0443	-18.3625	SP1
MAP2K2	1	15	0.00529101	0.00330907	0.00198194	0.48037	25.447	-18.6577	MAPK1
MAP2K7	3	21	0.015873	0.00463269	0.0112403	0.0689194	7.12116	-19.0478	GADD45B;-;MAPK8
STK4	3	18	0.015873	0.00397088	0.0119021	0.0493822	6.33684	-19.0623	CASP3;ABL1;TP53
MAP3K2	2	18	0.010582	0.00397088	0.00661113	0.189661	11.7395	-19.5171	MAPK8;MAPK1
MAPK7	2	20	0.010582	0.00441209	0.00616992	0.219315	12.9608	-19.6647	PML;RXRA
MAP3K10	2	21	0.010582	0.00463269	0.00594932	0.234292	13.575	-19.6999	TUBB;PHB
MARK4	2	19	0.010582	0.00419148	0.00639053	0.204428	12.62	-20.0347	TUBB;TUBA4A
PBK	3	18	0.015873	0.00397088	0.0119021	0.0493822	6.72494	-20.2297	SMAD4;E2F4;TP53
UHMK1	3	13	0.015873	0.00286786	0.0130052	0.0240498	5.47514	-20.4093	SMAD2;SMAD4;STMN1
IRAK2	1	15	0.00529101	0.00330907	0.00198194	0.48037	27.8848	-20.4451	SMAD2
SGK2	3	10	0.015873	0.00220604	0.013667	0.0134134	4.85489	-20.9319	GSK3B;CREB1;FOXO1
MKNK2	3	9	0.015873	0.00198544	0.0138876	0.0106267	4.61323	-20.9643	MAPK1;MAPK14;ESR1
MAP2K6	2	17	0.010582	0.00375028	0.00683173	0.175052	12.3023	-21.4388	MAPK14;-
NEK2	1	11	0.00529101	0.00242665	0.00286436	0.387842	22.6847	-21.486	MAPK1
CDK14	3	12	0.015873	0.00264725	0.0132258	0.0201214	5.54339	-21.6523	RB1;CDKN1A;YWHAQ
NEK6	2	15	0.010582	0.00330907	0.00727294	0.146463	11.3019	-21.7108	SMAD4;CDK7
NEK1	2	18	0.010582	0.00397088	0.00661113	0.189661	13.0667	-21.7236	WWTR1;TP53BP1
SGK3	3	13	0.015873	0.00286786	0.0130052	0.0240498	5.95696	-22.2053	GSK3B;FOXO1;CREB1
MARK2	2	17	0.010582	0.00375028	0.00683173	0.175052	12.952	-22.5711	HDAC4;GSK3B
RPS6KA4	3	10	0.015873	0.00220604	0.013667	0.0134134	5.24076	-22.5955	CREB1;MAPK1;MAPK14
MELK	3	14	0.015873	0.00308846	0.0127846	0.028362	6.34995	-22.623	SMAD2;SMAD4;SMAD3
PRKAA2	3	17	0.015873	0.00375028	0.0121227	0.0435722	7.2411	-22.6888	HNF4A;PPARGC1A;TP53
PTK6	1	12	0.00529101	0.00264725	0.00264375	0.412407	25.9329	-22.9699	CTNNB1
ERN1	1	12	0.00529101	0.00264725	0.00264375	0.412407	25.964	-22.9975	COPS5
MYLK	2	16	0.010582	0.00352967	0.00705234	0.160639	12.8023	-23.4101	SVIL;PRKD2
CSNK1G2	3	15	0.015873	0.00330907	0.0125639	0.0330559	7.02965	-23.968	YWHAQ;CTNNB1;TP53
EEF2K	2	16	0.010582	0.00352967	0.00705234	0.160639	13.1198	-23.9908	MAPK14;MAPK8
CDC7	2	18	0.010582	0.00397088	0.00661113	0.189661	14.6464	-24.3498	CDKN1A;CDKN2A
TRIB3	3	16	0.015873	0.00352967	0.0123433	0.0381278	7.47062	-24.4051	SETDB1;KAT5;ATF4
CDK11B	3	15	0.015873	0.00330907	0.0125639	0.0330559	7.29121	-24.8598	YWHAQ;CASP3;CASP1
CSNK1G3	3	11	0.015873	0.00242665	0.0134464	0.0165767	6.09054	-24.9697	YWHAQ;CTNNB1;TP53
PLK4	1	9	0.00529101	0.00198544	0.00330557	0.335608	22.9172	-25.0213	SMAD4
BUB1B	3	14	0.015873	0.00308846	0.0127846	0.028362	7.07523	-25.207	HDAC1;CDC20;SNCG
BUB1	3	14	0.015873	0.00308846	0.0127846	0.028362	7.32861	-26.1097	SVIL;HDAC1;CDC20
DYRK2	1	13	0.00529101	0.00286786	0.00242315	0.43599	31.5592	-26.1984	TP53
CSNK1A1L	3	12	0.015873	0.00264725	0.0132258	0.0201214	6.73287	-26.2984	YWHAQ;CTNNB1;TP53
CDK8	2	15	0.010582	0.00330907	0.00727294	0.146463	14.1234	-27.1308	SMAD3;MED21
MKNK1	2	13	0.010582	0.00286786	0.00771415	0.119004	12.8414	-27.3342	MAPK14;MAPK1
ACVR1B	2	14	0.010582	0.00308846	0.00749355	0.132569	13.5461	-27.3719	SMAD2;SMAD4
EPHA3	1	11	0.00529101	0.00242665	0.00286436	0.387842	30.3604	-28.756	TP53
TLK1	1	10	0.00529101	0.00220604	0.00308496	0.362257	28.5023	-28.9413	HIST1H1A
BMX	3	14	0.015873	0.00308846	0.0127846	0.028362	8.35044	-29.7501	STAT1;CASP3;TP53
STK39	1	9	0.00529101	0.00198544	0.00330557	0.335608	27.5787	-30.1108	MAPK14
TYRO3	1	9	0.00529101	0.00198544	0.00330557	0.335608	27.9219	-30.4855	RANBP9
AKT3	1	9	0.00529101	0.00198544	0.00330557	0.335608	28.3404	-30.9424	PRKCD
PKN2	1	9	0.00529101	0.00198544	0.00330557	0.335608	28.379	-30.9845	CASP3
MATK	1	9	0.00529101	0.00198544	0.00330557	0.335608	29.3276	-32.0202	EWSR1
PKD2	1	11	0.00529101	0.00242665	0.00286436	0.387842	34.2866	-32.4748	PRKD2
MAP4K5	2	8	0.010582	0.00176484	0.00881717	0.0580433	11.4988	-32.7322	GSK3B;ABL1
STK3	2	10	0.010582	0.00220604	0.00837597	0.0808158	13.294	-33.4421	CASP3;ABL1
MLTK	1	9	0.00529101	0.00198544	0.00330557	0.335608	31.0219	-33.8701	CHEK2
MAPKAPK3	2	9	0.010582	0.00198544	0.00859657	0.0691176	13.1051	-35.0161	CBX4;MAPK14
BRD2	3	7	0.015873	0.00154423	0.0143288	0.00614953	6.95193	-35.3949	KDM5A;RB1;E2F1
KSR1	1	8	0.00529101	0.00176484	0.00352617	0.307851	32.2984	-38.0519	MAPK1
PIK3CB	2	8	0.010582	0.00176484	0.00881717	0.0580433	13.8691	-39.4793	YWHAQ;PRKCD
VRK1	2	8	0.010582	0.00176484	0.00881717	0.0580433	13.8959	-39.5555	JUN;TP53
GAK	2	11	0.010582	0.00242665	0.00815536	0.0930708	16.6831	-39.6122	AR;CREBBP
HIPK1	2	8	0.010582	0.00176484	0.00881717	0.0580433	14.2246	-40.4914	NKX2-5;TP53
EIF2AK3	1	7	0.00529101	0.00154423	0.00374677	0.278942	32.6191	-41.6465	NFE2L2
LATS1	1	7	0.00529101	0.00154423	0.00374677	0.278942	33.445	-42.701	CDK1
STK38	2	7	0.010582	0.00154423	0.00903778	0.0476646	14.0336	-42.7122	CTDP1;-
SMG1	1	8	0.00529101	0.00176484	0.00352617	0.307851	36.6839	-43.2187	TP53
MAPK15	1	7	0.00529101	0.00154423	0.00374677	0.278942	33.9444	-43.3386	JUN
STK35	1	6	0.00529101	0.00132363	0.00396738	0.248831	31.3585	-43.6191	SMAD4
EIF2AK4	2	6	0.010582	0.00132363	0.00925838	0.0380578	13.4617	-44.0017	SMAD4;EWSR1
MYLK2	1	6	0.00529101	0.00132363	0.00396738	0.248831	31.9491	-44.4405	NFKB2
KSR2	1	5	0.00529101	0.00110302	0.00418798	0.21747	29.5526	-45.0881	MAPK1
MERTK	1	7	0.00529101	0.00154423	0.00374677	0.278942	35.4315	-45.2373	VAV1
TAOK2	2	7	0.010582	0.00154423	0.00903778	0.0476646	14.9639	-45.5435	TUBB;TUBA4A
SIK1	1	5	0.00529101	0.00110302	0.00418798	0.21747	29.947	-45.69	SREBF1
STK24	1	6	0.00529101	0.00132363	0.00396738	0.248831	33.3662	-46.4117	CASP3
NUAK2	2	5	0.010582	0.00110302	0.00947899	0.0293047	13.3525	-47.1343	SMAD2;SMAD4
TTBK1	1	6	0.00529101	0.00132363	0.00396738	0.248831	35.276	-49.0682	TUBB
MAP4K3	1	5	0.00529101	0.00110302	0.00418798	0.21747	33.3048	-50.8129	MAPK14
CLK4	1	5	0.00529101	0.00110302	0.00418798	0.21747	33.3875	-50.939	ABL1
ULK2	1	6	0.00529101	0.00132363	0.00396738	0.248831	39.4044	-54.8107	SETDB1
CDK20	1	5	0.00529101	0.00110302	0.00418798	0.21747	36.5626	-55.7833	CDK2
FRK	1	5	0.00529101	0.00110302	0.00418798	0.21747	36.7462	-56.0634	RB1
PKMYT1	1	6	0.00529101	0.00132363	0.00396738	0.248831	40.7728	-56.7142	CDK1
TSSK6	1	3	0.00529101	0.000661813	0.00462919	0.150788	31.2865	-59.1902	HSP90AB1
PAN3	1	3	0.00529101	0.000661813	0.00462919	0.150788	31.3916	-59.3891	SVIL
CAMK1D	1	4	0.00529101	0.000882418	0.00440859	0.184807	35.4961	-59.9331	EP300
TSSK4	1	3	0.00529101	0.000661813	0.00462919	0.150788	31.7987	-60.1593	CREB1
PNCK	1	2	0.00529101	0.000441209	0.0048498	0.115358	29.2124	-63.0906	HSP90AB1
PAK6	2	3	0.010582	0.000661813	0.0099202	0.0147129	15.9919	-67.4702	AR;ESR1
STK19	1	6	0.00529101	0.00132363	0.00396738	0.248831	49.2147	-68.4567	SP3
TSSK1B	1	3	0.00529101	0.000661813	0.00462919	0.150788	37.6958	-71.3158	CHEK2
VRK2	1	5	0.00529101	0.00110302	0.00418798	0.21747	47.0408	-71.7699	TP53
TP53RK	1	4	0.00529101	0.000882418	0.00440859	0.184807	42.8687	-72.3813	TP53
DYRK3	2	4	0.010582	0.000882418	0.00969959	0.0214922	18.8929	-72.5498	CREB1;SIRT1
TRIM33	2	2	0.010582	0.000441209	0.0101408	0.00906565	15.635	-73.5354	SMAD4;TRIM24
NEK3	1	5	0.00529101	0.00110302	0.00418798	0.21747	50.9833	-77.7849	VAV1
TSSK3	1	2	0.00529101	0.000441209	0.0048498	0.115358	36.5425	-78.9214	SMAD4
RIPK4	1	2	0.00529101	0.000441209	0.0048498	0.115358	36.8604	-79.608	PRKCD
MAPK6	1	4	0.00529101	0.000882418	0.00440859	0.184807	47.2419	-79.7652	XPO1
MAP3K6	2	4	0.010582	0.000882418	0.00969959	0.0214922	21.1355	-81.1615	MAPK8;MAPK14
CAMK1G	1	3	0.00529101	0.000661813	0.00462919	0.150788	47.3265	-89.5359	EP300
MOK	1	3	0.00529101	0.000661813	0.00462919	0.150788	48.4529	-91.667	JUN
STK17B	1	3	0.00529101	0.000661813	0.00462919	0.150788	53.0513	-100.367	-
SNRK	1	3	0.00529101	0.000661813	0.00462919	0.150788	54.5351	-103.174	JUN
RNASEL	1	3	0.00529101	0.000661813	0.00462919	0.150788	60.2485	-113.983	AR
LYK5	1	2	0.00529101	0.000441209	0.0048498	0.115358	55.0203	-118.828	SMAD4
STK17A	1	2	0.00529101	0.000441209	0.0048498	0.115358	81.9559	-177.002	TP53
TAF1L	1	1	0.00529101	0.000220604	0.0050704	0.0784569	69.9144	-177.947	TBP
SLK	1	2	0.00529101	0.000441209	0.0048498	0.115358	175.362	-378.733	CASP3

## Sheet: SuppData3 E2K brown.results_tf
TF	Target/Input	Targets/Database	Fraction/Input	Fraction/Database	Difference	P-value	Z-score	Combined Score	Genes
CREM-20920259	583	5776	0.473599	0.137318	0.336281	1.34078e-169	-0.708933	275.664	ITSN1;FNBP4;RC3H1;RC3H2;SF1;MEPCE;LARP1;HEXIM2;PBX3;SFXN3;NMT2;SNX11;SHB;NEFH;BC048403;FAM117B;TRP53BP1;EGLN2;CCDC9;PDCD7;FBXO28;MSI2;MAP3K9;MAP3K7;DMTF1;UAP1;BMF;SP2;SP1;SP3;PTEN;0610040J01RIK;ARL4C;ZFP422;MLLT1;MTHFSD;U2AF2;UBQLN1;E2F5;UBQLN4;TRIM44;DBNDD2;NECAP2;NECAP1;TRIM39;CERK;ATXN7L3;FBXO9;TMEM170B;6430548M08RIK;TTBK2;MED13L;GRB2;MRPS12;SYNCRIP;PCYT1A;ZHX3;PRPF40B;ZHX1;CTTNBP2NL;RNF144A;R…
EGR1-20690147	499	6207	0.405361	0.147564	0.257797	9.28506e-103	-0.889716	209.028	CAPNS1;SF1;LARP1;SFXN3;SHB;BBC3;EGLN2;SKI;PDCD7;MSI1;MSI2;KCNH6;DMTF1;SP2;SP1;SP4;SP3;MLLT1;U2AF2;CERK;PRPF40B;ZHX1;RAP2C;SH3BGRL;HDGF;TACC1;GRK5;LASP1;GFOD2;TNIP1;PRKCE;PRDM15;PRDM10;PRKCZ;PRDM16;BTG2;RARA;CDKN2D;CDKN2C;NFIA;NFIC;COL27A1;FKBP8;TOX;FKBP5;BCL9;CEBPA;MTPN;ABLIM2;TUB;ASXL2;TCERG1;RPS6KA3;ZZZ3;MTSS1;GLTSCR1;NFX1;NFYA;ZMAT3;ZMAT4;THRB;OXSR1;MDC1;EML1;AR;PRKAR2B;TTLL9;PFKFB2;SBNO2;SOCS…
KDM5B-21448134	361	3724	0.293258	0.0885339	0.204724	5.62244e-90	-0.918064	188.668	ALKBH8;FNBP4;RC3H1;RC3H2;SF1;LARP1;HEXIM2;NEBL;SNX11;BBC3;SHF;TRP53BP1;EGLN1;CCDC6;PDCD7;MSI2;MAP3K7;STX7;DMTF1;ZKSCAN5;SP1;SP3;BCAS1;NKX3-1;TRIM67;U2AF2;E2F3;E2F5;NECAP1;IKZF1;FBXO9;ZFP503;GRB2;SYNCRIP;TOX2;PCNP;ZFP26;CNN3;COX10;MKRN1;FGF12;LMNB1;ZIC1;TBP;OLIG2;SHROOM1;BNIP3;TNIP1;WIPF1;MBNL2;PRDM15;PRDM16;4933404O12RIK;RARA;PPP1R8;CDKN2D;CDKN2C;PCGF3;RRP1B;UBP1;TPM4;DYRK1A;LARP4B;PYGO1;ZFP346;A…
WT1-20215353	185	1663	0.150284	0.0395359	0.110748	2.53001e-51	-1.53725	179.095	ATF2;PKNOX2;PBX1;SFXN3;BBC3;SHF;CNOT6L;SLMAP;NAB1;MSI2;BNIP3L;ZFP467;UAP1;SLC9A3R2;SLC9A3R1;SP4;PTEN;EIF5A;MLLT1;U2AF2;MARCKSL1;DBNDD2;CERK;IKZF2;NUDT4;KCTD11;EIF1A;ZFP503;SYNCRIP;PRPF40B;RAP2A;YAP1;CRTC3;ZFAND3;ZFAND5;RPP25;DDX6;CNN3;UBE2H;DYRK2;LASP1;BNIP3;TEF;WIPF2;MBNL1;PRKCE;BCL10;PHC1;FOSL2;BTG2;PHF23;RARA;NFIA;NFIC;RIMS2;SALL1;COL27A1;TPM4;HIC1;PYGO1;CBFB;DAB1;AP1G2;LCORL;CRK;CEBPA;FBXL19;…
MITF-21258399	482	5578	0.391552	0.132611	0.258941	3.63785e-109	-0.715974	178.772	ITSN1;ZC3H12C;FNBP4;RC3H1;LARP1;SNX12;SHB;BBC3;SHF;SYNPO2;FAM117B;EGLN2;MBD1;SNX22;SKI;CCDC9;MSI1;MSI2;MAP3K9;STX7;AMDHD2;BMF;SP1;TRIM67;BCAS1;MSL2;MLLT1;U2AF2;UBQLN1;E2F3;E2F5;E2F6;TRIM39;CERK;TMEM170B;ZBTB4;MED13L;SYNCRIP;ZHX3;PCYT1A;PRPF40B;RNF144A;RNF144B;CNKSR3;PTMA;PCNP;HDGF;TACC1;CNN3;GRK5;FGF14;FGF13;FGF12;LASP1;ZIC1;ETV4;GFOD2;CYTH1;BNIP3;TEF;WIPF1;MBNL1;MBNL2;PRKCE;PRDM15;PRKCZ;PRDM10;P…
EP300-20729851	195	2093	0.158408	0.0497587	0.108649	1.19436e-43	-1.78986	176.898	ITSN1;AKT1;FRS2;PBX3;PBX1;SHB;BBC3;SHF;MED13;CNOT6L;SKI;CCDC9;SNX15;YPEL2;MSI1;MSI2;BNIP3L;BMF;ZNRF2;U2AF2;E2F6;CERK;HHIP;EPC1;SMARCC2;CCDC86;ZFP503;ZBTB4;5730409E04RIK;MED13L;MAP1LC3B;ZHX1;CTTNBP2NL;RAP2A;PTMA;YAP1;PCNP;TACC1;HDGF;ZFAND5;POU3F1;POU3F2;RPP25;CNN3;UBE2H;LASP1;ZIC1;ETV4;GNG2;GNG8;WIPF1;MBNL1;MBNL2;PRDM10;PHC2;NFATC2;FOSL2;MEX3A;BTG2;JARID2;RARA;RUNX1T1;HIPK3;NFIA;FOSB;TPM4;TPM1;DYR…
TCF3-18467660	156	1388	0.126726	0.0329981	0.0937281	1.40061e-43	-1.67542	165.321	GMFB;RABGEF1;AKT1;PKNOX2;MEF2A;HDGFRP3;SF1;PBX3;UCK2;EIF5;LAD1;MTMR12;MESDC1;PELI2;TRP53BP1;SKI;SLMAP;LIMS1;PDCD7;EIF4ENIF1;SCMH1;BNIP3L;DMTF1;LRRC58;SLC9A3R2;ATXN1;BCL2L11;STK35;ATXN7;ZBTB17;FOXN2;KSR1;0610040J01RIK;SLC25A13;ZFP422;CXXC5;PARD6B;ZNRF2;UBQLN1;E2F6;TRIM44;DBNDD2;TRIM39;SLC25A36;AI854703;NUDT4;RASSF5;EPC1;QK;KCTD12;EIF1A;FOXG1;UBE2J1;FOXF2;BC005537;WASL;SH3RF1;ZHX3;ZFX;CNKSR3;PTMA;S…
CREB1-20920259	290	3057	0.235581	0.0726767	0.162904	2.20176e-68	-0.921174	143.506	ATF2;GMFB;ITSN1;FNBP4;ATF7;SF1;MEPCE;HEXIM2;D17WSU92E;SFXN3;BBC3;BC048403;PPARD;TRP53BP1;CCDC9;CASC3;2900026A02RIK;MAP3K9;MAP3K7;PSKH1;BNIP3L;DMTF1;DLX2;DLX6;UAP1;LIN7C;AMDHD2;BMF;SP2;SP1;SP3;SNAP23;PTEN;EIF5A;ARL4C;MLLT1;MTHFSD;ATXN1L;UBQLN1;EIF4B;NECAP1;TRIM39;CERK;LGALS9;ATXN7L3;CCDC94;TMEM170B;CCDC86;KCTD11;FAM76A;FBF1;ZFP503;6430548M08RIK;ZBTB4;TTBK2;ZFP512;GRB2;MAP1LC3B;OTUD6B;PCYT1A;CTTNBP…
TRIM28-19339689	258	3072	0.209586	0.0730333	0.136552	7.80845e-51	-1.13899	131.412	CAPNS1;SF1;NEBL;NMT2;NEFH;BC048403;PLAGL1;SKI;PDCD7;MSI2;MAP3K9;BMF;4930452B06RIK;0610040J01RIK;ARL4C;MLLT1;UBQLN1;E2F5;E2F6;CABLES2;TRIM39;IKZF1;FBXO9;TTBK2;PCYT1A;CNKSR3;PTMA;PCNP;CNN3;MKRN1;LASP1;OLIG2;ETV4;SHROOM4;PRKCE;ARMC7;PRKCZ;PRDM16;ZFP365;PPP1R8;CDKN2C;HIPK3;RIMS2;COL27A1;FKBP4;DAB1;PHACTR4;DNAJC5;DNAJC8;ABLIM2;ASXL1;SRRM2;SRRM1;AU022252;ZZZ3;TMED8;PPHLN1;MTSS1;PURB;ARHGDIA;ZMAT3;PMAIP…
MYCN-18555785	207	2261	0.168156	0.0537527	0.114403	2.18254e-45	-1.25151	128.7	ATF2;FNBP4;ATF7;PBX3;NMT2;MTMR12;BBC3;EPS15L1;PLSCR3;MBD1;TAOK1;LIMS1;MSI2;MAP3K9;SHC1;AMDHD2;SP1;SP4;BC052040;EIF5A;MLLT1;MTHFSD;ZNRF2;UBQLN4;CIZ1;MID1IP1;NUDT3;AKAP12;SYNCRIP;MAP1LC3B;PTMA;PCNP;HDGF;TACC1;ZFAND3;POU3F1;PPIF;DDX6;UBE2I;MKRN1;LMNB1;TBP;TEF;SNTB2;WIPF1;WIPF2;SCRIB;FNDC3A;HMOX1;SETD1A;NFATC2;FOSL2;CEP57;BTG2;ZFP365;NSD1;RAB30;FKBP5;SLC7A6OS;MAP3K10;PLEKHF2;WDR4;AP1G2;TLK1;PHACTR4;Z…
POU5F1-18692474	316	4233	0.256702	0.100635	0.156067	6.98741e-53	-1.04978	126.071	ITSN1;CAPNS1;FNBP4;HEXIM2;PBX3;SNX12;SNX11;SHF;BC048403;TRP53BP1;PDCD7;MAP3K7;LY6E;BMF;SP2;SP1;SP3;ARL4C;TRIM44;CABLES2;LGALS9;ATXN7L3;ARL15;ZBTB4;ZFP512;SYNCRIP;PCYT1B;TOX4;ZFP26;CNN3;COX10;MKRN1;LMNB1;LASP1;OLIG2;ETV4;TEF;TNIP1;MBNL2;PRKCZ;PRDM16;PHF23;CIT;RARA;GAS7;PPP1R8;ZFP384;NFIA;FKBP4;DAB1;CTDSP2;LCORL;ASXL1;ASXL2;COG3;YOD1;AU022252;ZCCHC14;PPHLN1;MTSS1;PURB;2310057M21RIK;RALBP1;LPP;ZMAT2…
PPARG-20887899	305	3565	0.247766	0.0847538	0.163012	8.48335e-63	-0.870228	124.377	ITSN1;FAM110B;EPSTI1;FNBP4;RC3H1;LARP1;HEXIM2;PBX1;SNX12;SHB;SYNPO2;LY6E;AMDHD2;BMF;SP2;SP1;SP3;PTEN;MSL2;UBQLN1;E2F3;TRIM44;NECAP1;TMEM170B;MED13L;GRB2;ZHX1;RNF144A;TOX4;RNF144B;CNKSR3;PTMA;AI837181;SH3BGRL;TACC1;HDGF;GRK5;LASP1;TBP;BNIP3;TEF;POLE3;CNST;MBNL1;MBNL2;PRKCE;MEX3A;BTG2;PHF23;ZFP365;4933404O12RIK;RARA;WDR25;CDKN2C;UBP1;FGF2;COL27A1;TPM4;RALGAPA2;DYRK1A;LARP4B;TOX;FKBP5;BCL9;ZC3H4;SGI…
MYC-19030024	306	3868	0.248578	0.0919573	0.156621	4.9639e-56	-0.970076	123.532	CAPNS1;FNBP4;RC3H1;NMT2;SNX12;SNX11;BBC3;NEFH;PLSCR3;EGLN2;MSI2;MAP3K7;LY6E;SP1;PTEN;MLLT1;MTHFSD;U2AF2;E2F3;UBQLN4;NECAP1;TRIM39;IKZF2;SYNCRIP;RAP2C;PTMA;PCNP;HDGF;TACC1;CNN3;COX10;MKRN1;LMNB1;LASP1;ZIC3;TBP;ETV4;WIPF2;PRDM16;PHF23;PPP1R8;ZFP384;PCGF3;RRP1B;FOSB;COL27A1;TPM4;FKBP8;FKBP4;TPPP;DAB1;DIS3;DNAJC5;CEBPA;MTPN;ASXL1;ASXL2;TCERG1;YOD1;SRRM1;CSTF2;PUM2;FEZF2;PPHLN1;MTSS1;NFX1;PURB;NFYA;23…
ZFP281-18757296	188	2004	0.152721	0.0476428	0.105079	2.08682e-42	-1.26345	121.257	RC3H1;SF1;PBX1;SNX12;SHF;TRP53BP1;MSI1;MSI2;ZFP467;SHC1;SLC9A3R1;BMF;SP1;SP4;EIF5A;ARL4C;U2AF2;E2F3;MARCKSL1;MID1IP1;CERK;SMARCC2;NUMBL;ZFP503;PRPF40B;RAP2C;PTMA;YAP1;HDGF;GRIP1;COX6B2;DDX6;UBE2H;UBE2I;MKRN1;DYRK2;LASP1;ZIC3;OLIG2;RNF6;BNIP3;SNTB2;PRKCE;PHC1;PHF23;JARID2;AEBP2;TAF9B;CDKN2D;NR1H3;NFIC;RIMS2;SALL1;HIC1;RAB30;FKBP4;FKBP5;ZFP358;DAB1;TLK1;RFFL;TUB;FBXL19;ASXL1;SRRM2;SRRM1;TLN1;RALGDS…
TCFAP2C-20176728	227	2667	0.184403	0.0634049	0.120998	3.5429e-45	-1.17686	120.453	ATF2;GMFB;AKT1;FNBP4;FRS2;B230219D22RIK;ATF7;BAZ2A;D17WSU92E;SFXN3;BBC3;CNOT6L;PPARD;EGLN1;SNX22;LIMS1;CASC3;BNIP3L;CISH;KCNH6;LY6E;SP2;ARL4C;E2F5;TRIM44;CIZ1;MARCKSL1;MID1IP1;CABLES2;NECAP2;IKZF2;NUDT4;ARL15;KCTD11;EIF1A;TTBK2;GRB2;OTUD7B;MAP1LC3B;OTUD6B;CTTNBP2NL;RAP2A;CNKSR3;PTMA;HDGF;POU3F1;UBE2H;MXD1;LASP1;ZIC3;ETV4;CUEDC1;MBNL2;PRKCE;ARMC7;FNDC3A;BCL10;PRDM16;PHC2;PHC1;JARID2;ZFP365;PPP1R8;…
ZFX-18555785	265	3249	0.215272	0.0772413	0.138031	4.27225e-50	-1.04556	118.856	CAPNS1;FNBP4;RC3H1;SF1;MBD1;PDCD7;DMTF1;LY6E;UAP1;SP2;4930452B06RIK;PTEN;ZFP422;E2F5;TRIM44;CABLES2;TRIM39;CERK;FBXO9;MON1A;ZHX1;AI837181;PCNP;TACC1;ZFP26;LYL1;ETV4;GFOD2;ZMYND11;TEF;PCGF3;TPM4;ZFP346;ZFP358;DIS3;DNAJC8;CRK;MTPN;ZFP319;TCERG1;SRRM2;YOD1;SRRM1;PARVB;ZZZ3;RBAK;TMED8;PPP2CB;NFYA;2310057M21RIK;NUPL2;ARHGDIA;RALBP1;LPP;ZMAT3;PMAIP1;ZCCHC3;RABEP1;AKT1S1;DEK;CAPN10;EML1;CGGBP1;PRKAR2B;P…
HNF4A-19822575	467	6083	0.379366	0.144616	0.23475	5.17196e-88	-0.567018	113.962	ALKBH8;FAM110B;RC3H2;LARP1;HEXIM2;PBX1;NMT2;SHB;SHF;PLSCR3;EGLN1;EGLN2;MBD1;SKI;SNX15;MSI2;MAP3K7;KCNH6;LY6E;UAP1;AMDHD2;BMF;SP2;SP1;SP3;TRIM67;BCAS1;MLLT1;UBQLN1;E2F3;E2F5;UBQLN4;TRIM44;TRIM39;CERK;ARL15;TMEM170B;ZBTB4;MED13L;ITGBL1;GRB2;MON1A;SYNCRIP;PCYT1A;RNF144A;RAP2C;RNF144B;TOX2;CNKSR3;GRK5;LMNB1;LASP1;TBP;ETV4;GFOD2;CYTH1;BNIP3;CD4;TEF;MBNL1;MBNL2;PRKCE;PRKCZ;PRDM10;RRP7A;PRDM16;MEX3A;CIT…
SUZ12-20075857	358	4356	0.29082	0.103559	0.187262	4.85953e-71	-0.661232	107.055	ZC3H12C;NEBL;PBX3;SHB;NEFH;SYNPO2;PLAGL1;SNX22;SKI;MSI1;MAP3K9;KCNH6;ZFP467;TRIM67;NKX3-1;0610040J01RIK;ARL4C;ZFP422;E2F6;TRIM44;DBNDD1;DBNDD2;CERK;IKZF1;FBXO9;TMEM170B;ZFP503;6430548M08RIK;ZHX3;ZHX1;RNF144A;RNF144B;RAP2A;FAM196A;GRIP1;4933431E20RIK;TMOD2;GRK5;FGF14;FGF13;FGF12;LYL1;ZIC1;4833422C13RIK;SHROOM1;OLIG2;ETV4;ZMYND11;1700003E16RIK;CYTH1;WIPF1;MBNL1;PRKCE;PRDM16;MEX3B;ZFP385B;ZFP365;PRU…
RUNX1-21571218	397	5071	0.322502	0.120557	0.201945	1.86352e-74	-0.577722	98.0791	ZC3H12C;CAPNS1;LARP1;HEXIM2;BTBD19;PBX1;MRVI1;SNX12;BBC3;SHF;SYNPO2;EGLN1;EGLN2;SKI;CCDC9;SNX15;DMTF1;LY6E;UAP1;AMDHD2;BMF;SP1;SP4;SP3;PTEN;BCAS1;MSL2;ARL4C;MLLT1;UBQLN1;CABLES2;DBNDD1;IKZF1;TMEM170B;ZBTB4;MED13L;GRB2;MRPS12;PTMA;HDGF;TACC1;GRIP1;GRK5;MKRN1;LYL1;LASP1;BNIP3;TNIP1;TEF;POLE3;WIPF1;MBNL2;PRKCE;ARMC7;PRDM15;PRDM10;PRKCZ;RRP7A;PRDM16;MEX3C;MEX3B;MEX3A;BTG2;RARA;GAS7;PRUNE2;CDKN2D;NFIC…
FOXA2-19822575	253	2968	0.205524	0.0705608	0.134963	7.3426e-51	-0.835673	96.4685	ATF2;ITSN1;FAM110B;ATF7;LARP1;EPB41L2;HEXIM2;NEBL;NMT2;MTMR12;SHB;CNOT6L;EPS15L1;PPARD;EGLN1;SKI;YPEL2;MSI2;UAP1;SLC9A3R2;SLC9A3R1;AMDHD2;BMF;BCAS1;MLLT1;ZNRF1;TRIM44;CCDC91;ARL15;CCDC86;EPB41;MED13L;GRB2;OTUD7B;SH3RF1;AKAP12;RNF144A;RNF144B;RAP2A;KIF9;CNKSR3;ZFAND3;ZFAND5;TBC1D20;GRK5;HOOK3;HOOK1;LASP1;SHROOM1;ETV4;CUEDC1;ASAP3;GNG4;CYTH1;BNIP3;TEF;POLE3;MBNL2;PRKCE;SCRIB;PRKCZ;PRDM10;PRDM16;PHC…
GATA4-21415370	173	2039	0.140536	0.0484749	0.0920612	7.05116e-34	-1.25112	95.5039	ITSN1;PKNOX2;RC3H1;MEPCE;BAZ2A;NEBL;PBX3;PBX1;SHB;SAMD5;TRP53BP1;LIMS1;CISH;UAP1;AMDHD2;BMF;E2F3;UBQLN4;CIZ1;CCDC91;CCDC94;ARL15;ZFP503;5730409E04RIK;MED13L;OTUD7B;THTPA;RNF144B;YAP1;PCNP;TACC1;TMOD2;PPIF;RPP25;UBE2F;UBE2H;UBE2I;FGF12;LDB3;TBP;ETV4;ATF7IP;SNTB2;MBNL1;MBNL2;PRKCE;CTBP1;PAFAH2;FOSL2;MEX3A;PHF3;PHF23;ZEB2;AEBP2;PPP1R8;RUNX1T1;CDKN2C;PCGF3;DEF8;HIPK3;FKBP8;FKBP5;CBFB;BCL9;PLEKHF2;PHA…
SFPI1-20887958	219	2369	0.177904	0.0563203	0.121584	8.52789e-49	-0.857943	94.96	EPSTI1;FNBP4;RC3H1;B230219D22RIK;BAZ2A;BC048403;PPARD;MBD5;TAOK3;LIMS1;PDCD7;PSKH1;LIN7C;SP1;ZNRF2;U2AF2;E2F5;EIF4B;CIZ1;NECAP1;IKZF1;CCDC94;SMARCC2;TMEM170B;EIF1A;ZFP512;BSDC1;MED13L;SH3RF1;MAP1LC3B;PCYT1A;TOX4;RAP2A;CNKSR3;CCNYL1;OTUD5;TBC1D20;UBE2F;1810013L24RIK;HP1BP3;LYL1;LASP1;TBP;SHROOM1;EPN1;ASAP3;TEF;SNTB2;CNST;MBNL1;ARMC7;BCL10;HMOX2;NFATC3;FOSL2;PHF23;AEBP2;MTF1;RARA;ZFP384;NR1H3;UBP1;…
SOX2-18692474	251	3319	0.203899	0.0789055	0.124994	6.80325e-42	-0.940858	89.185	ITSN1;ALKBH8;CAPNS1;FNBP4;SNX11;SHF;BC048403;TRP53BP1;PDCD7;MSI1;LY6E;BMF;SP2;SP3;PTEN;BCAS1;U2AF2;TRIM44;LGALS9;ATXN7L3;FBXO9;ARL15;MRPS12;SYNCRIP;PCYT1B;TOX4;PTMA;ZFP26;CNN3;MKRN1;LMNB2;LASP1;ETV4;TNIP1;PRDM10;PHF23;CIT;GAS7;TPM1;FKBP8;FKBP4;DAB1;CTDSP2;ASXL1;TCERG1;AU022252;RBAK;FEZF2;PPHLN1;MTSS1;GLTSCR1;ARHGDIA;RALBP1;LPP;ZMAT2;PMAIP1;MDC1;DAXX;PRKAR2A;MLLT11;UCK2;CDC42EP3;ARF6;ZFP260;HDDC3;…
FLI1-21571218	445	5834	0.361495	0.138697	0.222798	4.89109e-82	-0.465831	87.2149	ITSN1;ALKBH8;ZC3H12C;CAPNS1;EPSTI1;FNBP4;HEXIM2;BTBD19;NEBL;PBX3;PBX1;SFXN3;MRVI1;BBC3;PLAGL1;EGLN1;MBD5;EGLN2;MBD1;SKI;CCDC9;PDCD7;FBXO28;MSI1;MAP3K7;DMTF1;ZKSCAN5;SP2;SP1;SP4;BCAS1;MSL2;MLLT1;U2AF2;UBQLN1;E2F3;E2F6;DBNDD1;NECAP2;NECAP1;CERK;ZBTB4;MED13L;GRB2;ZHX3;RAP2C;TOX4;RAP2A;PTMA;PCNP;TACC1;GRK5;COX10;FGF14;MKRN1;LMNB2;LYL1;LASP1;TBP;GFOD2;CD4;POLE3;WIPF1;CNST;MBNL1;PRKCE;ARMC7;PRDM15;BCL1…
RCOR3-21632747	235	2851	0.190902	0.0677793	0.123122	1.04779e-44	-0.856985	86.7843	CAPNS1;LARP1;PBX3;MTMR12;SHF;NEFH;SKI;SLMAP;CCDC6;YPEL2;FBXO28;MSI2;LY6E;SP1;SP3;ZNRF2;TRIM44;NECAP1;IKZF2;ARL15;NUMBL;FAM78B;MED13L;OTUD7B;THTPA;RNF144B;FAM196B;FAM196A;HDGF;OTUD4;GRIP1;POU3F1;POU3F2;PPIF;RPP25;DDX6;CNN3;COX10;1810013L24RIK;SYT6;FGF14;MKRN1;MXD1;LMNB1;LASP1;ETV4;GNG2;GNG4;CYTH1;ATF7IP;WIPF1;CTBP1;PRKCZ;PRDM16;HMOX2;PHC1;NFATC2;MEX3B;ZFP385B;ZFP385A;JARID2;ZFP365;CIT;AEBP2;MTF1;P…
SALL4-18804426_ESC	109	1065	0.0885459	0.0253192	0.0632267	2.3738e-27	-1.39748	85.6727	RABGEF1;HDGFRP3;FRS2;UCK2;EIF5;EZH2;MESDC1;TRP53BP1;PDCD7;EIF4ENIF1;BNIP3L;ZFP219;DMTF1;LY6E;MAX;STK35;BMF;FOXN2;SP3;HMG20A;ARNT;CXXC5;CXXC4;PARD6B;TRIM44;TRIM39;SLC25A36;HHIP;NUDT3;NUDT4;EPC1;THAP2;KCTD12;EIF1A;UBE2J1;RCOR1;WASL;AKAP12;SYNCRIP;PCYT1B;CNN3;TBC1D12;UBE2F;UBE2H;FGF13;CHD9;PSIP1;ETV4;PDLIM5;GOLPH3;SOX11;SOX12;RPL28;CDC42SE1;NOLC1;HMOX1;ZFP184;PHC1;ARPP21;NFATC3;CPEB2;TRIM8;JARID2;TE…
YAP1-20516196	205	2329	0.166531	0.0553693	0.111162	1.46497e-42	-0.870315	83.8346	ALKBH8;CAPNS1;NDST4;AKT1;FRS2;HEXIM2;SKI;TAOK1;CASC3;MSI2;2900026A02RIK;MAP3K7;KCNH6;SP2;SP1;SP4;4930452B06RIK;EIF5A;ARL4C;ZNRF1;U2AF2;UBQLN1;TRIM44;MARCKSL1;HHIP;NUDT4;FBXO9;ARL15;ZFP503;RAB22A;PTMA;TTC9;TACC1;OTUD4;ZFAND5;GRIP1;POU3F1;PPIF;CNN3;COX10;1810013L24RIK;HOOK3;MKRN1;DYRK2;LASP1;NAV3;ZMYND11;CUEDC1;GNG2;ATF7IP;SNTB2;MBNL2;PRKCE;FNDC3A;HMOX2;PHC1;PHF3;JARID2;GAS7;CDKN2D;NFIA;SALL1;SNRPN…
NANOG-18692474	235	3052	0.190902	0.0725578	0.118344	3.37841e-40	-0.876377	79.6504	ITSN1;ALKBH8;CAPNS1;PKNOX1;PKNOX2;FRS2;ATF7;BAZ2A;PBX1;MTMR12;SNX11;MECP2;SHF;BC048403;TRP53BP1;SLMAP;YPEL2;PDCD7;FBXO28;MAP3K7;DMTF1;LY6E;BMF;SP2;SP1;SP3;BC052040;EIF4B;TRIM44;CABLES2;HHIP;NUDT3;EPC1;LGALS9;FBXO9;SMARCC2;ARL15;FBF1;ZBTB4;ZFP512;GRB2;MRPS12;SH3RF1;AKAP12;SYNCRIP;MAP1LC3B;PCYT1B;RAP2A;CCNYL1;HDGF;ZFP26;OTUD4;ZFAND5;COX6B2;PPIF;RPP25;CNN3;MKRN1;LASP1;ZIC3;OLIG2;ETV4;CUEDC1;CD4;TNIP…
POU5F1-18347094	177	2109	0.143786	0.0501391	0.0936465	3.9211e-34	-1.02208	78.6197	ITSN1;AKT1;PKNOX1;FRS2;NMT2;SHF;TRP53BP1;YPEL2;CASC3;LY6E;DLX6;AMDHD2;SP2;SP1;SP3;PTEN;EIF5A;MLLT1;E2F3;MID1IP1;HHIP;IKZF2;NUDT3;EPC1;ATXN7L3;CCDC94;AKAP12;PCYT1B;PTMA;TTC9;GRIP1;POU3F2;CNN3;COX10;UBE2I;FGF12;LASP1;ZIC3;TBP;OLIG2;ETV4;ATF7IP;TNIP1;FNDC3A;PRDM16;PHC1;PHF23;JARID2;AEBP2;RARA;GAS7;NFIA;CEP135;SNRPN;DAB1;DIS3;CTDSP2;RAB23;RFFL;ASXL1;TNRC6C;TNRC6B;SRRM2;HECA;TLN1;DCUN1D3;AU022252;ZZZ3…
SOX2-21211035	258	3420	0.209586	0.0813066	0.128279	5.51381e-43	-0.802708	78.1066	ZC3H12B;RC3H1;LARP1;PBX3;PBX1;TFCP2L1;PLSCR3;SYNPO2;EGLN1;MBD5;EGLN2;MSI2;MAP3K9;DMTF1;SP4;SP3;PTEN;BCAS1;ARL4C;E2F3;E2F6;CERK;IKZF1;GRB2;SYNCRIP;ZHX3;RAP2C;SH3BGRL;GRK5;COX10;FGF14;FGF13;FGF12;ZIC3;ZIC1;ZMYND11;BNIP3;MBNL2;PRKCE;PRDM15;PRKCZ;PRDM16;PCGF3;HIPK3;TPMT;COL27A1;TOX;FKBP5;DAB1;LBH;CTDSPL;LCORL;MTPN;ABLIM2;TUB;ASXL2;RPS6KA3;ARRDC4;SRRM2;FAM43A;ZCCHC14;NOL4;ARHGDIA;LPP;ZMAT4;PMAIP1;TSGA…
CCND1-20090754	175	2137	0.142161	0.0508047	0.0913561	1.58069e-32	-1.04705	76.6704	CAPNS1;PKNOX2;ATF7;SF1;SFXN3;NMT2;SNX12;PLSCR3;ZSWIM4;CCDC9;CASC3;BNIP3L;CISH;ZFP467;SHC1;SP1;SNAP23;PTEN;EIF5A;ZFP422;U2AF2;E2F3;UBQLN4;CCDC94;FBXO9;NUMBL;ZFP503;BSDC1;MRPS12;RAP2A;CNKSR3;PTMA;GRIP1;COX6B2;CNN3;UBE2H;UBE2I;FGF12;DYRK2;LASP1;RNF6;ATF7IP;POLE3;PRKCE;FNDC3A;CTBP1;NFATC3;PAFAH2;CEP57;PHF23;JARID2;PPP1R8;NFIA;NFIC;FOSB;SALL1;TPM4;RAB30;TOX;DAB1;LBH;AP1G2;ZFP319;FBXL19;ASXL1;ASXL2;TNR…
MTF2-20144788	241	2981	0.195776	0.0708699	0.124906	1.34439e-44	-0.749558	75.7187	GMFB;AKT1;PKNOX2;HDGFRP3;ISL1;NEBL;PBX3;BBC3;NEFH;CNOT6L;SAMD5;PLAGL1;EGLN1;SNX22;NAB1;MSI1;DLX1;DLX2;ZFP467;DLX5;DLX6;LIN7A;SLC9A3R1;NKX3-1;0610040J01RIK;ARL4C;MTHFSD;CCDC85A;E2F6;TRIM44;CIZ1;DBNDD2;CERK;HHIP;IKZF1;NUDT4;KCTD12;ZFP503;RAB27B;RNF144A;CRTC3;GRIP1;TMOD2;POU3F1;POU3F2;GPRIN1;SYT6;FGF14;FGF13;FGF12;DYRK2;LYL1;ZIC1;OLIG2;SHROOM1;ETV4;ZMYND11;CUEDC1;RNF6;GNG4;GNG8;WIPF1;MBNL1;PRKCE;PRD…
KLF4-18555785	200	2444	0.16247	0.0581033	0.104366	2.68175e-37	-0.87828	73.9593	ITSN1;RC3H1;D17WSU92E;NMT2;MTMR12;SNX11;BC048403;EPS15L1;PLSCR3;MSI1;MSI2;LY6E;UAP1;AMDHD2;SP4;BC052040;4930452B06RIK;ZNRF1;ZNRF2;E2F5;UBQLN4;EIF4B;MID1IP1;ARL15;BSDC1;AKAP12;SYNCRIP;MAP1LC3B;ZHX1;RAP2A;PTMA;PCNP;HDGF;TACC1;OTUD4;ZFAND3;PPIF;RPP25;CNN3;HOOK3;HOOK1;LMNB1;TBP;EPN1;GFOD2;BNIP3;TEF;SNTB2;WIPF2;SCRIB;ARMC7;BCL10;NFATC3;PHF23;CIT;ZFP384;PCGF3;HIPK3;PYGO2;FKBP4;CSNK1G2;ZFP346;CBFB;SLC7A…
TAL1-20566737	169	1875	0.137287	0.044576	0.0927108	5.11612e-36	-0.858417	69.7556	ITSN1;ALKBH8;AKT1;FRS2;BAZ2A;PBX1;MRVI1;MTMR12;BBC3;PLSCR3;EGLN1;SNX22;TAOK3;SNX15;MSI2;BNIP3L;CISH;ZFP467;EIF5A;U2AF2;TRIM44;HNRNPAB;NECAP2;IKZF1;IKZF2;RAB27B;MED13L;GRB2;RAB22A;PCYT1B;TOX2;PTMA;TACC1;OTUD5;CRTC3;ZFAND5;PPIF;UBE2F;UBE2H;HP1BP3;LYL1;GNG2;MBNL1;PRKCE;CTBP1;PHC2;BTG2;ZFP385B;JARID2;ZEB2;MTF1;FGD3;NFIA;FOSB;UBP1;FGF2;ANKRD13A;TPM1;ZC3H4;WDR4;DNAJB2;RFFL;TNRC6B;FRAT1;SRRM1;RALGDS;PAR…
NANOG-18347094	158	1908	0.128351	0.0453605	0.0829904	8.19682e-30	-0.978066	65.5048	CAPNS1;FNBP4;FRS2;SNX11;SHF;TRP53BP1;SLMAP;PDCD7;MSI2;MAP3K7;SHC1;AMDHD2;SP2;SP1;SP3;BC052040;SNAP23;PTEN;EIF5A;MLLT1;CCDC85A;E2F6;EIF4B;MID1IP1;HHIP;EPC1;ARL15;GRB2;SH3RF1;SYNCRIP;ZFAND5;COX6B2;RPP25;CNN3;MKRN1;TBP;OLIG2;ETV4;CD4;TNIP1;PHC1;NFATC3;GMEB1;JARID2;AEBP2;SALL1;SNRPN;TPM4;CTDSP2;STOX2;ABLIM1;RFFL;ASXL1;TNRC6C;TNRC6B;RPS6KA3;KRT1;DCUN1D3;DND1;FUBP3;CITED2;CITED4;PPHLN1;MTSS1;GLTSCR1;VG…
EOMES-20176728	149	1744	0.12104	0.0414616	0.0795782	2.04847e-29	-0.963127	63.6221	ATF2;FRS2;D17WSU92E;SFXN3;MTMR12;BBC3;CNOT6L;PPARD;SLMAP;CASC3;MSI2;LY6E;SHC1;SLC9A3R2;SP4;ARL4C;MTHFSD;CIZ1;NECAP1;3110035E14RIK;CCDC91;ARL15;EIF1A;ZFP503;ZFP512;GRB2;OTUD7B;MAP1LC3B;CTTNBP2NL;RAP2A;HDGF;TACC1;OTUD5;CRTC3;ZFAND5;POU3F1;CNN3;MKRN1;HP1BP3;LASP1;ZIC3;ETV4;GNG8;TNIP1;MBNL2;ATG12;BCL10;PHC1;JARID2;AEBP2;RIMS2;RAB30;FKBP4;WDR4;TFDP1;STOX2;ABLIM1;RFFL;COG3;SRRM1;DCUN1D1;PUM2;KLHDC8A;CI…
REST-21632747	172	2339	0.139724	0.0556071	0.0841167	6.53415e-27	-1.0418	62.8131	BTBD19;PBX3;SFXN3;NEFH;BC048403;TAOK3;MSI2;CASC3;MAP3K9;MAP3K7;KCNH6;PTEN;TRIM67;ARL4C;MLLT1;TRIM44;DBNDD2;LGALS9;CCDC94;6430548M08RIK;FAM78B;MED13L;MAP1LC3B;RAP2A;FAM196B;FAM196A;GRIP1;POU3F1;POU3F2;COX10;1810013L24RIK;SYT6;FGF14;MKRN1;NAV3;ZMYND11;GNG4;PRKCE;FNDC3A;CTBP1;PRDM16;MEX3B;PRUNE2;NR1H3;HIPK3;FOSB;TMEM229A;RIMS2;RIMS3;MAGI2;DYRK1A;TPPP;DAB1;PLEKHF2;CCDC50;CTDSPL;ASXL1;ARRDC4;SRRM3;SRR…
GFI1B-20887958	171	1871	0.138911	0.0444809	0.0944306	3.79157e-37	-0.746292	62.5862	ITSN1;PKNOX1;RC3H1;HEXIM2;BTBD19;NMT2;BBC3;PPARD;FAM117B;SNX15;CCDC6;PDCD7;CISH;SLC9A3R1;PTEN;MSL2;ZNRF1;ZNRF2;E2F5;UBQLN4;MARCKSL1;NECAP1;IKZF1;LGALS9;TBC1D22B;ARL15;KCTD11;MAP1LC3B;CTTNBP2NL;TOX4;RAP2A;PTMA;HDGF;PPIF;RPP25;UBE2F;1810013L24RIK;HOOK3;PLEK;LMNB1;LYL1;TBP;SNTB2;CNST;BCL10;PHC2;SETD1A;NFATC3;MEX3C;PAFAH2;FOSL2;MEX3B;SIKE1;WDR25;DEF8;TPM4;PYGO2;CBFB;ZC3H4;LBH;ZFP777;SGIP1;TFDP1;ZFP77…
TCF3-18347094	174	2221	0.141348	0.0528017	0.0885467	3.34597e-30	-0.875641	59.4296	CAPNS1;PKNOX1;HEXIM2;SHF;BC048403;TRP53BP1;EGLN2;SNX15;YPEL2;PDCD7;LY6E;ZFP467;DLX6;SLC9A3R1;BMF;SP1;SP3;BC052040;CCDC85A;E2F6;HHIP;NUDT3;EPC1;ATXN7L3;AKAP12;THTPA;SYNCRIP;PCYT1B;PTMA;OTUD5;COX6B2;CNN3;MKRN1;ZIC1;OLIG2;ETV4;GNG2;CD4;TNIP1;ATG12;PHC1;NFATC3;PAFAH2;FOSL2;PHF23;JARID2;MTF1;SNRPN;TPM4;RAB30;FKBP4;CBFB;DAB1;DIS3;TFDP1;CTDSP2;CEBPA;ABLIM1;RFFL;ASXL1;TNRC6C;VAPA;TNRC6B;TCERG1;RPS6KA3;SR…
GATA1-21571218	217	2601	0.176279	0.0618358	0.114444	7.9725e-42	-0.595367	56.3411	ZC3H12C;RC3H1;HEXIM2;NMT2;MRVI1;MTMR12;MED15;BBC3;MECP2;MED13;EPS15L1;PLAGL1;ZSWIM4;SKI;CCDC9;SLMAP;YPEL2;NAB1;MSI2;MAP3K9;CISH;DLX2;BMF;SP1;SP4;ITGAM;SNAP23;BCAS1;ZNRF1;ZNRF2;E2F3;IKZF1;NUDT4;CCDC91;EPC1;TBC1D22B;ARL15;EPB41;BSDC1;RAB27B;MED13L;SH3RF1;RNF144A;KIF9;CNKSR3;PTMA;CRTC3;RPP25;GRK5;UBE2F;SYT6;PLEK;CUEDC1;CD4;TNIP1;WIPF2;MBNL1;NAIF1;PRDM16;NFATC2;FOSL2;MEX3B;BTG2;JARID2;CIT;ZEB2;WDR25;…
SETDB1-19884255	159	2020	0.129163	0.0480232	0.0811401	9.0659e-28	-0.828088	51.5633	ATF2;GMFB;FRS2;BAZ2A;HEXIM2;PBX3;SFXN3;MTMR12;BC048403;PLSCR3;EGLN2;SKI;CCDC9;PDCD7;MSI1;MSI2;BNIP3L;ZFP467;DLX5;SP4;SNAP23;EIF5A;ZFP422;MLLT1;E2F3;TRIM44;CABLES2;DBNDD1;KCTD12;EIF1A;5730409E04RIK;AKAP12;THTPA;SYNCRIP;MAP1LC3B;HDGF;COX6B2;1810013L24RIK;FGF12;OLIG2;EPN1;GFOD2;GNG4;BNIP3;FNDC3A;PRKCZ;NFATC2;CIT;AEBP2;NSD1;RUNX1T1;UBP1;SALL1;DYRK1A;FKBP8;ZFP346;DAB1;DIS3;DNAJC8;LCORL;CEBPA;ABLIM1;AB…
E2F1-18555785	288	4172	0.233956	0.0991846	0.134772	1.57946e-41	-0.514337	48.3214	CAPNS1;SNX12;BC048403;SNX15;FBXO28;LY6E;AMDHD2;SP2;SP3;4930452B06RIK;PTEN;NKX3-1;E2F3;E2F5;UBQLN4;UBQLN2;TRIM39;MRPS12;CNKSR3;AI837181;TACC1;CNN3;MKRN1;LMNB2;LMNB1;LASP1;ZIC3;ETV4;BNIP3;TNIP1;TEF;BTG2;TPMT;ZFP329;RIMS2;FKBP4;ZFP346;DIS3;DNAJC5;DNAJC8;CRK;MTPN;TCERG1;ARRDC4;SRRM1;CSTF2;AU022252;PARVB;PUM2;ZZZ3;TMED8;PPHLN1;PPP2CB;NFYA;NUPL2;ARHGDIA;ZMAT2;ZMAT3;PMAIP1;TSGA10;ZCCHC3;DEK;CAPN10;RBMX;…
KLF4-18358816	140	1700	0.113729	0.0404156	0.0733131	3.3875e-26	-0.780137	45.7528	ATF2;CAPNS1;SFXN3;SHF;SKI;CISH;SHC1;SLC9A3R1;BMF;SP1;BC052040;0610040J01RIK;ARL4C;ZNRF1;UBQLN1;TRIM44;CABLES2;ARL15;EIF1A;ZFP503;ZFP512;MRPS12;OTUD7B;AKAP12;MAP1LC3B;CTTNBP2NL;KIF9;RAP2A;PTMA;RPP25;LASP1;OLIG2;ATF7IP;PHC1;NFATC3;NFATC2;PAFAH2;BTG2;PHF23;JARID2;CDKN2C;SALL1;ANKRD13A;TPM4;PYGO2;CSNK1G2;FKBP5;DAB1;PLEKHF2;FBXL19;ASXL1;FRAT1;TLN1;DCUN1D3;FUBP3;ZCCHC14;4833439L19RIK;MTSS1;RALBP1;CBX7;…
JARID2-20064375	108	1117	0.0877335	0.0265554	0.0611781	2.80109e-25	-0.808407	45.703	PKNOX2;HDGFRP3;ISL1;AR;RHBDL3;FLI1;EIF5;JPH2;JPH3;NEFH;SAMD5;PELI2;MAF;DLX1;DLX2;ZFP467;DLX6;LIN7A;ATXN1;TMEM28;MCC;PARD3B;ZFP664;CXXC4;PRRX1;IKZF1;RASSF5;CALN1;KCTD12;L3MBTL3;FOXG1;ZFP503;RAB11FIP4;FOXF2;ZFP703;CRTC3;POU3F1;POU3F2;GPRIN1;KLHL14;SYT6;FGF12;SOBP;LYL1;ZIC1;OLIG2;SHROOM1;SOX21;PRR18;PRDM16;NKX2-1;RAB3IP;DLX6OS1;CPEB2;ZFP385B;TESC;PAX6;ZEB2;PLCB2;FIGN;RUNX1T1;CDKN2C;NFIA;GRB10;COL27A…
PRDM14-21183938	161	1944	0.130788	0.0462164	0.0845716	2.16864e-30	-0.666567	45.5288	ITSN1;CAPNS1;MRVI1;SHB;SHF;PPARD;YPEL2;PDCD7;MAP3K7;CISH;SHC1;SP3;PTEN;BCAS1;ARL4C;NAF1;TRIM44;GM7367;NUDT3;NUDT4;SMARCC2;ARL15;MED13L;MRPS12;OTUD7B;AKAP12;PCYT1B;KIF9;AI837181;FAM196A;CCNYL1;HDGF;ZFAND5;TMOD2;COX10;1810013L24RIK;HOOK3;MKRN1;ZIC3;ETV4;CYTH1;SNTB2;PRDM16;NFATC3;JARID2;AEBP2;RARA;PRUNE2;NSD1;SALL1;LARP4B;PLEKHF2;CTDSPL;JAZF1;ASXL1;PANK3;SRRM3;DCUN1D3;FAM43A;PARVB;FUBP3;ZFP870;CHMP1…
TCFCP2L1-18555785	156	1987	0.126726	0.0472387	0.0794876	3.92961e-27	-0.742591	45.1504	BAZ2A;NMT2;MTMR12;SNX11;BC048403;PPARD;SLMAP;SNX15;LIMS1;MAP3K9;CISH;SHC1;SLC9A3R1;SP4;NKX3-1;EIF5A;ZNRF1;UBQLN1;UBQLN4;E2F6;MID1IP1;ARL15;KCTD12;MON1A;MAP1LC3B;RAP2A;PTMA;HDGF;OTUD4;UBE2F;HOOK3;MKRN1;OLIG2;CUEDC1;TNIP1;TEF;SNTB2;ADARB1;FNDC3A;CTBP1;CEP57;PHF6;ZFP365;CDKN2D;CDKN2C;TPMT;UBP1;ANKRD13A;PYGO2;FKBP4;DAB1;MAP3K10;PLEKHF2;AP1G2;PHACTR4;DNAJC5;ABLIM2;CCDC71;VAPA;RAB15;VAPB;SRRM1;DCUN1D3;…
E2F4-21247883	235	2998	0.190902	0.071274	0.119628	2.29705e-41	-0.467555	43.7512	ALKBH8;ZC3H12C;HDGFRP3;SF1;SFXN3;PLSCR3;SNX22;SKI;TAOK3;CCDC6;PDCD7;FBXO28;MAP3K9;SHC1;UAP1;AMDHD2;BMF;SP1;SNAP23;PTEN;MTHFSD;ZNRF1;UBQLN4;TRIM44;EIF4B;MARCKSL1;DBNDD1;NECAP2;NUDT4;EPC1;SMARCC2;FAM76A;KCTD12;ZBTB4;FAM78B;OTUD7B;PRPF40B;RAP2A;YAP1;HDGF;POU3F1;PPIF;RPP25;DDX6;CNN3;GRK5;TBC1D12;COX10;UBE2I;DYRK2;HP1BP3;ZMYND11;ATF7IP;BNIP3;SNTB2;FNDC3A;BCL10;PRKCZ;PRDM10;PRDM16;HMOX2;SETD1A;MEX3B;CE…
AR-19668381	246	3519	0.199838	0.0836602	0.116177	8.99938e-36	-0.542171	43.751	EPSTI1;FNBP4;NEBL;PBX1;NMT2;MRVI1;SNX12;TFCP2L1;SHF;NEFH;MBD5;SKI;CCDC6;PDCD7;MSI2;STX7;BMF;SP4;SP3;ARL4C;DBNDD1;IKZF2;FBXO9;ITGBL1;ZHX3;CTTNBP2NL;RAP2A;CNKSR3;SH3BGRL;GRK5;FGF14;FGF12;LASP1;ZIC3;ZIC1;BNIP3;WIPF1;PRKCE;PRDM15;PRKCZ;PRDM16;CIT;GAS7;PCGF3;NFIA;RIMS2;TOX;DAB1;MAP3K10;PHACTR4;SGIP1;ABLIM2;TCERG1;ARRDC4;SRRM2;PARP4;NOL4;LPP;ZMAT3;ZMAT4;THRB;RABEP1;COL6A3;CDH15;CAPN10;SAMD12;AR;VTI1A;U…
DACH1-20351289	142	1698	0.115353	0.040368	0.0749854	3.53803e-27	-0.704886	42.932	CAPNS1;MEPCE;MED13;PPARD;SKI;TAOK1;AMDHD2;SP4;PTEN;MSL2;E2F6;HNRNPAB;NUDT3;SMARCC2;ARL15;KCTD11;ZBTB4;GRB2;ZHX1;KIF9;PTMA;YAP1;ZFAND3;TBC1D20;LMNB1;LASP1;EPN1;CYTH1;GPATCH8;PRKCE;SCRIB;ATG12;CTBP1;NAIF1;PRDM10;CEP57;PCGF3;NR1H3;CSNK1G2;CBFB;DNAJC5;CEBPA;ASXL1;VAPA;VAPB;ASXL2;PANK3;FRAT1;SRRM2;DCUN1D1;PUM2;ZZZ3;CITED2;CHMP1A;PTS;PURB;NFYA;EME2;ARHGDIA;ZMAT3;RPRD1B;MAPK1IP1L;FAM84B;CDK2AP2;RABGEF1;…
TAL1-20887958	170	2067	0.138099	0.0491406	0.0889585	8.7486e-32	-0.550788	39.389	ATF2;RC3H1;B230219D22RIK;HEXIM2;PBX1;BC048403;PLSCR3;TAOK3;CCDC9;LIMS1;PDCD7;SLC9A3R1;PTEN;ZFP422;MARCKSL1;IKZF1;SMARCC2;ARL15;DHRS11;MAP1LC3B;TOX4;TOX2;PTMA;OTUD4;ZFAND3;UBXN2A;ZFAND5;PPIF;RPP25;DDX6;CNN3;UBE2F;1810013L24RIK;LMNB2;LYL1;TBP;EPN1;POLE3;CNST;MBNL1;PRKCE;HMOX2;FOSL2;MEX3B;BTG2;SIKE1;MTF1;GAS7;4930539E08RIK;CDKN2D;ANKRD13C;ANKRD13A;TPM4;PYGO2;FKBP8;ZFP346;LBH;SGIP1;DNAJC5;CRK;CEBPA;T…
MEIS1-20887958	127	1452	0.103168	0.0345196	0.0686485	6.06885e-26	-0.616875	35.8182	SAMD14;PKNOX1;FRS2;CGGBP1;HEXIM2;MLLT11;BBC3;EFCAB2;PPARD;ARF6;EGLN2;TAOK3;CCDC9;NAB1;MAF;MAX;BCL2L11;AMDHD2;ZKSCAN5;SOCS7;ZBTB17;ZFP236;FHL3;HMG20A;EIF5A;MLLT1;CXXC4;E2F5;EIF4B;CYB5B;CIZ1;IKZF2;NUDT3;FAM53B;CCDC94;THAP1;KCTD12;ZFP503;6430548M08RIK;EAF1;ICK;BC005537;GRB2;RCOR1;PPP1R10;SCML4;PCYT1A;CTTNBP2NL;TOX2;AI597479;MNT;HSF1;CSDC2;OTUD4;PALM;OSCAR;RPP25;UBE2F;UBE2H;UBE2I;HOOK3;PICALM;PRR3;HP…
SMARCA4-20176728	99	1118	0.0804224	0.0265792	0.0538432	1.0147e-20	-0.733163	33.7527	AKT1;FRS2;NEBL;D17WSU92E;LITAF;BBC3;LRRC1;VAMP2;PPARD;SPSB1;SLMAP;PDCD7;ZFP207;FBXO28;EIF4ENIF1;SCMH1;SLC25A42;BNIP3L;LRRC58;PFKFB2;SLC9A3R2;TMEM28;SOCS6;SP2;SP1;SP4;0610040J01RIK;VPS37C;VEZF1;ARL4C;PARD6B;FOXJ2;NUDT4;EIF1A;FBF1;TTBK2;ZFP512;EAF1;GRB2;OTUD7B;6430573F11RIK;CTTNBP2NL;RAP2A;PTMA;MNT;SERTAD2;PAK6;HDGF;OTUD5;RGS3;MKRN1;MXD1;PICALM;LASP1;ARHGEF19;EPN1;GOSR2;EFS;BNIP3;GOLPH3;BACH1;MBNL2…
GATA2-19941826	160	2410	0.129976	0.057295	0.0726806	7.94409e-21	-0.715412	33.1106	ITSN1;LARP1;NEBL;MTMR12;SNX11;BBC3;PPARD;SNX22;TAOK3;SLMAP;LIMS1;YPEL2;BNIP3L;SP4;SP3;TRIM67;BCAS1;NAF1;MLLT1;ZNRF1;E2F3;MID1IP1;IKZF1;NUDT3;NUDT4;CCDC91;TBC1D22B;CCDC94;ARL15;EPB41;ZBTB4;BSDC1;MED13L;ZHX3;HDGF;OTUD5;GRIP1;POU3F1;GPRIN1;PPIF;RPP25;UBE2H;MKRN1;LYL1;LASP1;EPN1;TNIP1;WIPF1;NFATC2;FOSL2;MEX3B;BTG2;JARID2;CIT;RUNX1T1;NFIA;NFIC;RIMS3;COL27A1;TPM4;DYRK1A;FKBP8;TPPP;DAB1;LBH;TLK1;DNAJB2;…
HOXB4-20404135	134	1824	0.108855	0.0433635	0.0654911	5.93856e-21	-0.651967	30.3639	GMFB;CAPNS1;FNBP4;ATF7;SF1;MTMR12;SNX11;CNOT6L;TRP53BP1;EGLN2;SLMAP;SNX15;LIMS1;PSKH1;DLX2;SP1;PTEN;ZFP422;ZNRF2;CIZ1;NECAP1;EPC1;LGALS9;FBXO9;ZFP512;BSDC1;RAB27B;GRB2;SYNCRIP;OTUD6B;RAP2C;CNKSR3;SH3BGRL;CRTC3;DDX6;UBE2H;HOOK3;MXD1;TBP;BCL10;CEP57;PPP1R8;CDKN2C;ANKRD13A;CSNK1G2;PHACTR4;DNAJC5;CRK;FBXL19;ASXL2;TNRC6B;TCERG1;FRAT1;COG3;DCUN1D3;DCUN1D1;ZZZ3;FUBP1;RNPS1;CITED2;NFX1;NFYA;RALBP1;POU2F1…
PAX3-FKHR-20663909	99	1063	0.0804224	0.0252716	0.0551508	3.73786e-22	-0.591494	29.1833	FAM110B;NEBL;PSMG3;RCSD1;SHB;RORA;MSI2;MAP3K7;SH3GLB1;MAF;FOXN2;MCC;BCAS1;PARD3B;ARL4C;MTHFSD;PRRX1;MID1IP1;RASSF4;EPC1;FOXG1;PIK3R1;N4BP1;MED13L;ITGBL1;CTTNBP2NL;ENAH;RNF144A;TOX2;STX16;PRKX;GRIP1;RGS3;POU3F1;DOK5;COX10;PICALM;DYRK2;CHD7;ZIC1;SHROOM4;NAV3;PRKCE;RAB3IP;MEX3B;FMN1;ZEB2;PRUNE2;FIGN;HS1BP3;RUNX1T1;WWOX;NFIA;ANKRD13A;MAGI2;VASH2;CACNB2;RAB30;TOX;RASAL2;DAB1;ADRA2C;JAKMIP1;NHS;MARCKS;…
ERG-20887958	156	1969	0.126726	0.0468107	0.0799155	1.60639e-27	-0.461673	28.4833	ALKBH8;PKNOX1;RC3H1;B230219D22RIK;SF1;BBC3;BC048403;CCDC6;LIMS1;DLX1;SHC1;SLC9A3R1;MSL2;ZNRF2;U2AF2;E2F6;UBQLN4;MARCKSL1;SMARCC2;EIF1A;ZFP512;BSDC1;MED13L;RAB22A;THTPA;TOX4;AI837181;CCNYL1;OTUD5;TBC1D20;GRK5;UBE2F;1810013L24RIK;LYL1;TBP;ATF7IP;CD4;SNTB2;HMOX1;FOSL2;4933404O12RIK;SIKE1;MTF1;WDR25;UBP1;TPM4;HIC1;ZFP346;CBFB;ZFP358;AKIRIN2;CCDC50;CTDSP2;DNAJC5;DNAJC8;CCDC71;ASXL1;VAPB;TCERG1;FRAT1;S…
SOX17-20123909	144	1947	0.116978	0.0462877	0.0706904	9.62194e-23	-0.546277	27.6937	ALKBH8;FNBP4;FRS2;MRVI1;MTMR12;SLMAP;LIMS2;NAB1;FBXO28;CISH;UAP1;SLC9A3R2;SP2;SP1;ARL4C;E2F3;E2F6;EIF4B;MARCKSL1;CABLES2;EPC1;SMARCC2;KCTD11;EIF1A;ZFP503;BSDC1;SYNCRIP;MAP1LC3B;PTMA;HDGF;CNN3;MXD1;LMNB1;ATF7IP;BNIP3;MBNL2;PHC1;NFATC2;PAFAH2;BTG2;FGD3;NFIA;COL27A1;TPM4;RAB30;FKBP8;PGR;FKBP4;CSNK1G2;PLEKHF2;CCDC50;CTDSPL;DNAJC5;LCORL;RFFL;FBXL19;RAB15;ASXL2;FRAT1;COG3;SRRM1;CSTF2;DCUN1D1;CITED2;TME…
MYC-18358816	221	3413	0.179529	0.0811402	0.0983886	1.37545e-27	-0.44481	27.5119	CAPNS1;FNBP4;PBX3;SNX12;SNX11;NEFH;BC048403;EGLN2;MAP3K7;LY6E;SP2;SP1;PTEN;0610040J01RIK;MLLT1;UBQLN1;E2F3;UBQLN4;TRIM39;FBXO9;ARL15;MRPS12;PCYT1A;RAP2A;PTMA;PCNP;HDGF;COX10;MKRN1;TBP;POLE3;CDKN2D;HIPK3;FKBP8;ZFP346;DNAJC5;DNAJC8;ASXL2;TCERG1;SRRM2;SRRM1;RBAK;NFX1;NFYA;NUPL2;ARHGDIA;ZMAT3;TSGA10;AKT1S1;CAPN10;PRKAR2A;VTI1A;MLLT11;UCK2;SASS6;ARF6;ZFP260;GATAD2A;MAX;BCL2L11;FOXN2;ARHGAP11A;RAD23A;R…
SUZ12-18692474	143	1909	0.116166	0.0453843	0.0707814	4.54324e-23	-0.523133	26.913	PKNOX2;HDGFRP3;ISL1;NEBL;PBX3;NEFH;PLAGL1;SNX22;NAB1;DLX1;DLX2;ZFP467;DLX5;DLX6;LIN7A;0610040J01RIK;DBNDD2;HHIP;ZFP503;ZHX1;TACC1;CRTC3;GRIP1;TMOD2;POU3F1;POU3F2;SYT6;FGF14;FGF13;FGF12;ZIC1;OLIG2;CUEDC1;GNG4;ADARB1;PRKCE;PRDM16;ARPP21;NFATC2;CDKN2C;NFIA;FGF2;COL27A1;TPM1;HIC1;PYGO1;PGR;TOX;DAB1;LHX6;LBH;CEBPA;STOX2;JAZF1;TUB;FRAT1;SNAP91;KLHDC8A;CITED1;CITED4;FEZF2;MTSS1;NOL4;NLRP6;MAP6D1;THRB;ME…
SOX2-20726797	176	2564	0.142973	0.0609562	0.082017	2.14859e-24	-0.480362	26.1784	ALKBH8;HDGFRP3;ISL1;EPB41L2;NEBL;PBX3;SFXN3;TFCP2L1;PPARD;PLAGL1;EGLN2;LIMS2;YPEL2;MSI2;BNIP3L;LY6E;DLX1;SLC9A3R1;NKX3-1;BCAS1;ZNRF1;ZNRF2;MID1IP1;DBNDD2;NUDT4;KCTD12;RAB27B;AKAP12;PCYT1B;ZHX1;CTTNBP2NL;RAP2A;CNKSR3;TTC9;TACC1;CNN3;UBE2H;DYRK2;CUEDC1;GNG2;GNG4;ATF7IP;TEF;ADARB1;MBNL2;PRKCE;FNDC3A;NFATC3;CEP57;BTG2;PHF6;RARA;TAF9B;CDKN2C;NR1H3;NFIA;RAB30;CBFB;TPPP;SLC7A6OS;LHX6;WDR4;LBH;TFDP1;DNAJ…
SETDB1-19884257	167	2353	0.135662	0.0559399	0.0797222	1.4425e-24	-0.433363	23.7897	ALKBH8;CAPNS1;PKNOX1;RC3H1;PPARD;PLAGL1;ZSWIM4;EGLN1;MBD1;MSI2;2900026A02RIK;MAP3K9;LY6E;DLX1;ZFP467;DLX5;DLX6;SP3;ARL4C;EIF4B;TRIM44;CERK;ARL15;NUMBL;ZFP503;ITGBL1;SH3RF1;MAP1LC3B;ZHX3;AGGF1;GRIP1;POU3F2;RPP25;MKRN1;LYL1;ZIC1;ATF7IP;TEF;ZSCAN20;BCL10;PHC2;MEX3A;CIT;MTF1;PPP1R8;RUNX1T1;CDKN2C;DEF8;CEP135;SNRPN;TPM1;FKBP4;BCL9;LBH;ZFP777;DNAJC5;LCORL;TUB;ASXL2;TNRC6B;SRRM2;COG3;ZRANB2;PTS;APBA1;NU…
NANOG-18358816	102	1232	0.0828595	0.0292894	0.0535701	2.12611e-19	-0.5455	23.4537	GBP5;FRS2;RFX1;UCK2;MTMR12;SNX12;SHF;4931428F04RIK;TRP53BP1;ZFP260;PDCD7;ZFP467;MAX;SHC1;STK35;SOCS7;BC052040;PPM1B;PRCC;CXXC4;CCDC85A;TRIM44;SLC25A36;HHIP;EPC1;SMARCC2;THAP2;FBF1;ZFP512;OTUD7B;AKAP12;MAP1LC3B;ENAH;ZFP704;PLEKHA1;HDGF;KHSRP;DOK5;RPP25;E430018J23RIK;COX10;PICALM;CHD9;RBM18;OLIG2;SOX13;NOLC1;PHC1;CEP57;TRIM8;TRIM2;JARID2;BRD2;PAX6;ZFP148;FIGN;CHML;ZFP146;RUNX1T1;RYBP;SALL1;TPD52;SN…
KLF4-19030024	120	1502	0.0974817	0.0357083	0.0617734	1.6359e-21	-0.464338	22.2242	LSM12;SF1;UCK2;SFXN3;NMT2;CTCF;LITAF;LRRC1;SHF;4931428F04RIK;MESDC1;UCP2;EGLN2;SPSB1;UBAP1;ZFP219;PFKFB2;DLX1;DLX5;BCL2L11;BMF;SP3;PTEN;EIF5A;PRCC;CXXC4;MTHFSD;ZNRF2;PRRX1;CD2BP2;FOXG1;ZFP503;PCBP1;FOXF2;MKX;PPP1R10;AKAP12;MAP1LC3B;RSRC1;PTMA;ZFP704;PRKX;MNT;POU3F2;CNN3;PHF12;HMGA1;MKRN1;FGF12;PICALM;LASP1;ZIC3;ZIC1;OLIG2;ZMYND11;PDLIM5;RBM39;MYC;SOX12;UNC13D;PRR14;PRDM16;ZFP184;PHC1;FOSL2;JARID2…
PHF8-20622854	124	1490	0.100731	0.0354231	0.0653081	1.32231e-23	-0.404702	21.3198	FNBP4;MEPCE;PRKAR2A;UCK2;SASS6;PSMG3;CTCF;SHB;EFCAB2;MED22;PDCD7;INO80D;UAP1;LIN7C;FOXO3;SLC9A3R1;BCL2L11;STK35;E4F1;SOCS7;ZBTB10;SP4;FOXM1;HMG20A;MSL2;PIK3CA;SLC25A19;PRCC;UBQLN1;UBQLN4;MARCKSL1;FOXJ3;HNRNPAB;FAM53C;FAM53B;EPC1;ARL15;ULK3;FBF1;ZBTB4;CALM1;PPP1R10;WASL;MAP1LC3B;PCYT1A;AKR1A1;ZFX;ZHX1;STX16;PCNP;HSF1;RGP1;HDGF;ZFAND5;ARID2;PPIF;RPP25;H1FX;COX10;GSK3A;LASP1;RBM18;ZMYND11;RNF6;GABPB…
SMAD3-18955504	147	1936	0.119415	0.0460262	0.0733889	3.06952e-24	-0.392639	21.2577	CAPNS1;NEBL;BBC3;SAMD1;EGLN1;MAP3K9;DMTF1;UAP1;BMF;SNAP23;ZNRF2;UBQLN1;CIZ1;CERK;LGALS9;TTBK2;RAB27B;ITGBL1;SH3RF1;RNF144B;RAP2A;PTMA;YAP1;AGGF1;HDGF;ZFAND5;CUEDC1;POLE3;MBNL1;MBNL2;ATG12;BCL10;PRDM10;FOSL2;MEX3B;CEP57;BTG2;JARID2;FGD3;TPM4;DYRK1A;CCDC50;DNAJB2;ABLIM1;ARRDC4;YOD1;TLN1;DCUN1D2;FUBP3;FUBP1;PARP4;TMED8;NFX1;PTS;PURB;NUPL2;PMAIP1;CASP9;SPRED2;SPRED1;RABEP1;AKT1S1;FAM84B;RBMS3;WEE1;MD…
SMAD2-18955504	147	1936	0.119415	0.0460262	0.0733889	3.06952e-24	-0.392639	21.2577	CAPNS1;NEBL;BBC3;SAMD1;EGLN1;MAP3K9;DMTF1;UAP1;BMF;SNAP23;ZNRF2;UBQLN1;CIZ1;CERK;LGALS9;TTBK2;RAB27B;ITGBL1;SH3RF1;RNF144B;RAP2A;PTMA;YAP1;AGGF1;HDGF;ZFAND5;CUEDC1;POLE3;MBNL1;MBNL2;ATG12;BCL10;PRDM10;FOSL2;MEX3B;CEP57;BTG2;JARID2;FGD3;TPM4;DYRK1A;CCDC50;DNAJB2;ABLIM1;ARRDC4;YOD1;TLN1;DCUN1D2;FUBP3;FUBP1;PARP4;TMED8;NFX1;PTS;PURB;NUPL2;PMAIP1;CASP9;SPRED2;SPRED1;RABEP1;AKT1S1;FAM84B;RBMS3;WEE1;MD…
NKX2-5-21415370	112	1507	0.0909829	0.0358272	0.0551557	5.82591e-18	-0.528273	20.9641	GMFB;RC3H1;FRS2;RFX1;EML3;BAZ2A;RHBDL3;UCK2;SFXN3;MRVI1;MED15;JPH2;4931428F04RIK;TCOF1;SKI;UBAP1;LIMS2;LIMS1;ZFP207;CISH;FOXP2;FOXP1;SBNO2;ZKSCAN5;MCC;FOXN2;MDM4;CELF3;VPS37C;SLC25A16;ZNRF2;SH2B3;PTPN4;CCDC91;6430548M08RIK;RBM12;THTPA;DOT1L;PCNP;MNT;MIB1;CSDC2;HDGF;KHSRP;DDX6;UBE2F;UBE2H;1810013L24RIK;LSM14B;CHD9;TEF;SNTB2;WIPF2;MYC;BRAF;FOSL2;BTG2;JARID2;ZEB2;RNF166;ZFP148;C530008M17RIK;ZFP143;R…
JARID2-20075857	108	1258	0.0877335	0.0299075	0.057826	1.39318e-21	-0.42077	20.2065	PKNOX2;HDGFRP3;ISL1;PBX3;FLI1;LAD1;SAMD5;MSI1;EIF4ENIF1;FOXP2;MAF;DLX1;DLX2;ZFP467;DLX5;DLX6;LIN7A;ATXN1;SP2;TRIM67;RAD23A;PRRX1;IKZF1;AI854703;FAM53B;CALN1;KCTD12;EIF1A;ZFP503;RAB11FIP4;FOXF2;MKX;RSRC1;ZFP703;SERTAD4;POU3F1;POU3F2;SYT6;FGF12;SOBP;ZIC1;OLIG2;ETV4;RBM24;CYGB;GNG4;SOX21;PRKCE;MED9;SOX11;SOX10;PRR18;PRDM16;NKX2-1;DLX6OS1;MEX3B;TESC;PAX6;ZEB2;RARA;GM13889;RUNX1T1;CDKN2D;NFIA;TMEM229A…
KLF1-20508144	99	1144	0.0804224	0.0271973	0.0532251	4.46733e-20	-0.431575	19.2288	ITSN1;SAMD14;LARP1;MYH7B;PBX3;PBX1;SFXN3;LITAF;MESDC1;ARF6;UCP2;1600014C10RIK;SNX22;TAOK3;MSI1;MAP3K7;SH3GLB1;MYLIP;CISH;MAX;AMDHD2;ZFP236;SP2;SP3;CELF4;E2F6;IKZF1;FAM53B;ARL15;MIER3;BSDC1;RASSF8;HSPA12B;MED13L;DHRS11;PCYT1A;CTTNBP2NL;RNF144B;CNKSR3;MNT;FAM196A;PAK6;HDGF;ARID2;TMOD2;POU3F1;1810013L24RIK;PHF12;CLK3;SYT6;MXD1;CHD7;ZIC3;EPN1;NAV3;ASAP3;1700003E16RIK;ATF7IP;POLE3;WIPF1;BACH1;CTBP1;ME…
SOX2-18358816	76	785	0.0617384	0.0186625	0.0430759	4.16985e-18	-0.462534	18.51	FRS2;HEXIM2;MLLT11;UCK2;MTMR12;SHF;4931428F04RIK;MESDC1;TRP53BP1;ZSWIM4;DMTF1;LY6E;MAX;BMF;SOCS7;SP3;ARNT;PPM1B;PRCC;SLC25A27;CABLES2;SLC25A36;HHIP;THAP2;NUMBL;BSDC1;OTUD7B;ENAH;PTMA;ZFP704;CRIP2;MNT;SERTAD2;PLEKHA1;CHD9;OLIG2;ETV4;ATF7IP;SOX13;NOLC1;ZFP184;PHC1;NFATC3;TRIM8;JARID2;PAX6;ZFP148;CHML;ZFP146;RYBP;TPD52;TPM4;ANKRD10;DAB1;ZFP64;RNF10;DNAJC8;WASF3;FBXL19;ASXL1;KLF9;INSM1;ZFP553;SOX2;MT…
TBX3-20139965	91	1068	0.0739236	0.0253905	0.0485332	3.88684e-18	-0.451608	18.1045	MDC1;ALKBH8;RFX3;PRKAR2A;VTI1A;FLI1;SFXN3;MRVI1;EZH2;MTMR12;LITAF;EPS15L1;TRP53BP1;ZSWIM4;LRRC20;SKI;YPEL2;ZFP687;SCMH1;FOXP4;MAX;LIN7C;MDM2;RAD23B;ARL4C;SLC25A16;PRCC;ZNRF1;ZNRF2;CCDC85A;HHIP;EPC1;XRCC2;ENAH;ZFP704;RXRA;SERTAD4;SERTAD2;OTUD5;DOK5;PHF12;GSK3A;ZIC3;CREB5;MYC;PRDM10;PRDM16;PHC1;PAFAH2;THAP11;JARID2;PAX6;AEBP2;CHN2;RYBP;ABI2;RIMS2;SALL1;ANKRD13A;TPD52;MAGI2;RHCG;TOX;CNOT6;LHX6;NF2;T…
PPARD-21283829	254	3447	0.206336	0.0819485	0.124388	1.26121e-40	-0.177929	16.3466	ITSN1;ALKBH8;ZC3H12C;FAM110B;BTBD19;PBX1;MRVI1;SNX11;FAM117B;MBD5;SKI;MSI2;MAP3K7;BMF;SP1;PTEN;BCAS1;ARL4C;E2F6;NECAP2;NECAP1;TMEM170B;ZHX1;RNF144A;CNKSR3;PTMA;PCNP;FAM196A;HDGF;FGF14;LASP1;ZIC3;ZIC1;TEF;MBNL2;PRKCE;ZSCAN20;ARPP21;BTG2;RARA;PRUNE2;CDKN2C;RRP1B;NFIA;NFIC;TMEM229A;COL27A1;RALGAPA2;LARP4B;FKBP8;TOX;AKIRIN2;LBH;CTDSPL;CTDSP2;TUB;RPS6KA3;ARRDC4;CAGE1;FAM43A;ZCCHC14;ZCCHC24;MTSS1;GLTSC…
CTNNB1-20460455	90	988	0.0731113	0.0234886	0.0496227	1.19041e-19	-0.36649	15.9697	ALKBH8;SAMD12;FRS2;VTI1A;PBX1;MRVI1;EZH2;SHB;BBC3;MED13;PPARD;GATAD2B;MSI2;FRMD5;DLX2;SHC1;SBNO2;ATXN1;E4F1;ZKSCAN5;MCC;HMG20A;PARD3B;CXXC5;SLC25A27;ZNRF1;FOXJ2;MED13L;ZHX3;ENAH;RAP2A;TOX2;YAP1;STX16;SERTAD4;RXRA;CRTC3;PPFIA4;RPP25;COX10;UBE2H;LASP1;EPN1;NAV3;CUEDC1;CREB5;MYC;MBNL2;PRKCE;ZSCAN20;CTBP1;NOLC1;THAP11;TRIM8;JARID2;TESC;GAS7;MSRB3;FAM107B;CEP135;RAB30;FKBP5;ANKRD11;SLC7A6OS;PSD3;CCDC5…
LMO2-20887958	134	1741	0.108855	0.0413903	0.0674643	1.3123e-22	-0.309043	15.5711	ATF2;PKNOX1;HEXIM2;SFXN3;MRVI1;MTMR12;TAOK3;CCDC9;SLC9A3R1;ZFP422;MLLT1;TBC1D22B;FBXO9;6430548M08RIK;BSDC1;GRB2;TOX2;PCNP;HDGF;UBXN2A;TMOD2;PPIF;RPP25;MXD1;PLEK;LMNB2;LYL1;CUEDC1;GNG4;GPATCH8;CNST;MBNL1;ARMC7;SCRIB;PRDM15;ARPP21;PAFAH2;BTG2;GMEB1;GAS7;4930539E08RIK;CDKN2D;DEF8;ANKRD13A;TPM4;TPM1;RAB37;CSNK1G2;ZC3H4;WDR4;SGIP1;DNAJB2;PANK3;COG3;SRRM1;CAGE1;RALGDS;ZCCHC24;PTS;BEGAIN;PPP2CB;CWC25;LP…
ESRRB-18555785	111	1434	0.0901706	0.0340917	0.0560789	5.27304e-19	-0.364052	15.3217	ITSN1;AKT1;RFX1;BAZ2A;RHBDL3;UCK2;EIF5;RCSD1;NEFH;EPS15L1;VAMP2;UCP2;LRRC20;MSI1;HDDC3;SH3GLB2;CISH;SLC9A3R2;ATXN1;SOCS5;4930452B06RIK;RAD23B;SLC25A19;SLC25A13;ZFP664;ZBTB43;MLLT1;CCDC85A;UBQLN1;CYB5B;SLC25A36;RASSF5;ZFP3;THAP1;CEND1;ZBTB4;ATP5D;WWTR1;CALM3;MKX;DIRAS1;AI837181;CRIP2;HSF1;PLEKHA1;AGGF1;KHSRP;PPIF;RPP25;COX10;UBE2F;UBE2I;PRR3;BCL7A;EPN1;ZMYND11;GOLPH3;MBNL1;SOX13;BRD2;TESC;NSD1;WWO…
ZFP42-18358816	113	1480	0.0917953	0.0351853	0.05661	6.42143e-19	-0.359448	15.0571	ALKBH8;FNBP4;DAXX;FRS2;EID1;HEXIM2;PBX3;PBX1;EIF5;SFXN3;EFCAB2;4931428F04RIK;MESDC1;ARF6;TCOF1;UCP2;SPSB1;SLMAP;ZFP207;PFKFB2;ATXN7;AMDHD2;SP1;SP3;5730455P16RIK;RAD23A;PRCC;E2F3;UBQLN4;TRIM39;SLC25A36;RASSF5;EPC1;QK;FBXO9;CD2BP2;KCTD11;EIF1A;PCBP1;SURF6;RASSF7;ICK;PPP1R10;ZFX;ENAH;2810004N23RIK;PTMA;ZFP704;AI597479;HDGF;OSCAR;E430018J23RIK;PHF12;MKRN1;LSM14A;UBE2Q1;ETV4;NUP50;EFS;RBM39;SNTB2;GABP…
SALL4-18804426	82	1006	0.0666125	0.0239165	0.042696	1.89927e-15	-0.43333	14.6887	GBP5;EIF5;NMT2;EZH2;LITAF;EFCAB2;UCP2;SPSB1;ZBTB39;BNIP3L;UAP1;SP1;HMG20A;PARD6B;CABLES2;SLC25A36;NUDT4;L3MBTL3;UBE2J1;WNK1;PPP1R10;SUV39H1;SYNCRIP;PCYT1B;CTTNBP2NL;ENAH;YAP1;FKBP1A;CNN3;E430018J23RIK;UBE2H;ZMYND11;CUEDC1;BNIP3;TSPYL1;PRKCE;BCL10;HMOX1;ZFP184;NFATC2;FOSL2;CPEB2;BTG2;AEBP2;FGD3;RYBP;NFIA;ZYX;SALL1;COL27A1;RAB30;TNKS;ZFP62;MAFK;OPA3;CCDC50;MTPN;RNF38;WBP4;FBXL19;KLF3;ASXL1;ASXL2;SO…
TP53-20018659	94	1123	0.0763607	0.026698	0.0496626	3.08934e-18	-0.353753	14.2628	RABGEF1;CAPNS1;PKNOX2;ISL1;AR;PBX3;FLI1;BBC3;JPH2;VAMP2;PPARD;PELI2;RORA;CASC3;MAP3K9;DLX1;DLX2;ZFP467;DLX5;ATXN1;SP1;MDM2;RAD23B;USP27X;CXXC4;MARCKSL1;PRRX1;MID1IP1;CALN1;FOXG1;ZFP503;ATP5D;FOXF2;MKX;PTMA;POU3F1;COX6B2;POU3F2;CHD9;SOBP;LASP1;ZIC1;OLIG2;ETV4;TEF;SOX21;SOX11;PRDM16;NFATC2;CPEB2;BTG2;ZFP365;BRD2;PAX6;ZEB2;AEBP2;RARA;CDKN2C;PCGF3;RYBP;NFIA;NFIC;GRB10;PHLDA3;TPM1;CACNB3;AK1;MAFB;LHX6…
TFAP2C-20629094	102	1203	0.0828595	0.0286	0.0542595	4.49751e-20	-0.294806	13.1331	CAPNS1;FRS2;ATF7;AGAP3;EPB41L2;RCSD1;SHB;MED15;EPS15L1;LRRC20;SKI;SPSB1;TAOK3;NAB1;SLC25A42;FOXP4;SHC1;LIN7A;ATXN1;MCC;CELF4;KSR1;PARD3B;PPP1R12C;ZNRF1;SH3BP5;FOXJ3;DBNDD1;NECAP1;USH1G;CERK;RASSF4;FAM76A;ZBTB4;RAB11FIP3;RAB11FIP4;MKX;SUV39H1;ZHX1;RXRA;TACC1;RGS3;BCL9L;UBE2H;SYT6;FGF12;GSK3B;NAA40;GFOD2;ASAP3;MYC;PRKCE;CDC42SE1;PRKCZ;PRDM16;CDK19;CLINT1;FAM102B;FAM102A;RARA;GAS7;HS1BP3;WWOX;NR1H3;…
NACC1-18358816	72	769	0.058489	0.0182821	0.0402069	1.62766e-16	-0.36092	13.121	CAPNS1;MLLT11;SASS6;4931428F04RIK;TRP53BP1;CISH;MAX;BMF;SP1;SP3;PRCC;CXXC4;CCDC85A;SLC25A36;HHIP;NUDT3;NUDT4;ARL15;ZFP3;KCTD11;CEND1;SURF6;AKAP12;SYNCRIP;ENAH;PTMA;ZFP704;SERTAD2;RBM26;CHD9;PSIP1;ZIC3;ETV4;SOX13;CDC42SE1;NOLC1;PHC1;BTG2;TRIM8;TRIM2;JARID2;AEBP2;ZFP148;SALL1;TPD52;SNRPN;TPM4;ANKRD10;PLEKHF2;DNMT3A;TFDP1;DNAJC5;SOS1;ASXL1;KLF9;DIXDC1;SOX2;SRRM1;DCUN1D3;FUBP3;CITED2;RALGPS2;MTSS1;SH…
ZFP281-18358816	59	578	0.0479285	0.0137413	0.0341872	2.9454e-15	-0.391541	13.1004	CAPNS1;PRKCE;SOX12;ISL1;RHBDL3;FMN1;TRIM8;BRD2;RARA;DEF8;NFIA;SNRPN;CACNB3;ZFP467;BMF;MDM4;HMG20A;DNMT3A;ARNT;RAD23B;ARL4C;RNF38;MLLT1;UBQLN1;BAK1;CCDC71;A430105I19RIK;ASXL1;KLF9;ZFP553;SLC25A36;SOX2;SRRM2;ZFP3;ZFP503;RASSF7;HSPA12B;CITED2;RALGPS2;GRIPAP1;ENAH;PTMA;YAP1;ZFP704;SHOC2;HDGF;CBX7;UBE2I;HMGA1;SMAD7;GSK3B;CHD9;SPRED2;OLIG2;KLF16;GAP43;NUP50;LEF1;SPRY2
NR1I2-20693526	78	939	0.0633631	0.0223237	0.0410395	3.72164e-15	-0.384271	12.7672	ITSN1;NEBL;SHB;CNOT6L;RORA;MSI2;FOXP1;SBNO2;ZFP236;SP2;0610040J01RIK;PARD3B;SLC25A19;SLC25A13;ZNRF2;FOXJ2;RASSF4;CCDC86;ZFP746;BC005537;RSRC1;CNKSR3;ALS2CL;ZFP710;ZFAND3;PROZ;HOOK3;GSK3B;BC034090;BCL7A;2610035D17RIK;SHROOM1;EPN1;PDLIM5;CD4;SNTB2;ADARB1;MBNL1;PRKCE;PRKCZ;SETD1A;PHF3;PHF6;ZFP148;HS1BP3;WWOX;PCGF3;NFIA;ANKRD13C;AHR;COL27A1;TPM1;TNKS;4931414P19RIK;DUSP10;SGIP1;DNMT3A;RNF38;ABLIM1;RFF…
RNF2-18974828	104	1300	0.0844842	0.030906	0.0535781	8.75432e-19	-0.30487	12.6764	PKNOX2;HDGFRP3;AR;RHBDL3;NEBL;PBX3;FLI1;RCSD1;JPH3;EGLN1;SPSB1;RORA;FOXP2;MAF;DLX1;DLX2;ZFP467;DLX5;LIN7A;ATXN1;BCL2L11;TMEM28;NKX3-1;CXXC4;PRRX1;CERK;HHIP;CALN1;KCTD12;L3MBTL3;FOXG1;ZFP503;FOXF2;MKX;ZHX1;CRTC3;GRIP1;POU3F1;POU3F2;KLHL14;SYT6;FGF12;SOBP;A330008L17RIK;ZIC1;SHROOM1;OLIG2;EFS;SOX21;PRKCE;SOX13;SOX11;PRDM16;FOSL2;CPEB2;TESC;PAX6;CDKN2C;NFIA;NFIC;GRB10;ZFP579;COL27A1;TPM1;VASH2;HIC1;C…
EZH2-18974828	104	1300	0.0844842	0.030906	0.0535781	8.75432e-19	-0.30487	12.6764	PKNOX2;HDGFRP3;AR;RHBDL3;NEBL;PBX3;FLI1;RCSD1;JPH3;EGLN1;SPSB1;RORA;FOXP2;MAF;DLX1;DLX2;ZFP467;DLX5;LIN7A;ATXN1;BCL2L11;TMEM28;NKX3-1;CXXC4;PRRX1;CERK;HHIP;CALN1;KCTD12;L3MBTL3;FOXG1;ZFP503;FOXF2;MKX;ZHX1;CRTC3;GRIP1;POU3F1;POU3F2;KLHL14;SYT6;FGF12;SOBP;A330008L17RIK;ZIC1;SHROOM1;OLIG2;EFS;SOX21;PRKCE;SOX13;SOX11;PRDM16;FOSL2;CPEB2;TESC;PAX6;CDKN2C;NFIA;NFIC;GRB10;ZFP579;COL27A1;TPM1;VASH2;HIC1;C…
E2F1-21310950	93	1145	0.0755483	0.0272211	0.0483273	2.77383e-17	-0.328398	12.5197	CHIC1;AKT1;RFX1;EPB41L2;PBX3;EZH2;LRRC1;CCDC6;NAB1;MSI2;DMTF1;STK35;ATXN7;BMF;SP3;MDM2;TRIM67;VPS37C;RAD23B;PPM1B;SLC25A19;CXXC5;PARD6B;UBQLN1;E2F3;E2F5;TRIM44;CIZ1;MMAB;TRIM39;SLC25A36;GCC1;EPC1;FBXO9;TMPO;THAP1;ZBTB4;XRCC2;CALM3;SUV39H1;OTUD7B;PTMA;CAMKK2;MNT;DOK5;HMGA1;FGF12;GSK3A;DDX46;HP1BP3;LMNB2;LMNB1;GNG8;ATF7IP;MYC;MBNL1;MBNL2;NOLC1;PRDM16;REL;GLI3;WDR25;PPP1R8;CDKN2D;NFIA;NFIC;FKBP5;ANK…
REST-19997604	127	2118	0.103168	0.050353	0.0528151	1.44318e-13	-0.413234	12.218	AKT1;PKNOX2;FNBP4;B230219D22RIK;SF1;PBX3;NMT2;SNX12;SNX15;MAP3K9;STX7;LIN7A;UAP1;4930452B06RIK;PTEN;EIF5A;ARL4C;UBQLN4;SMARCC2;KCTD12;ZHX3;PRPF40B;YAP1;TBC1D12;FGF14;LMNB2;LASP1;CUEDC1;GNG4;SCRIB;RARA;WDR25;TAF9B;FOSB;RIMS2;CEP135;SNRPN;DYRK1A;ZFP358;PLEKHF2;WDR4;LBH;TFDP1;CEBPA;TUB;PANK3;ARRDC4;SRRM2;DCUN1D1;ZCCHC14;MTSS1;PURB;2310057M21RIK;NUPL2;RALBP1;ZMAT2;POU2F1;KLHDC1;TSGA10;MAP6D1;TRPS1;RB…
PHC1-16625203	79	922	0.0641755	0.0219195	0.042256	5.15841e-16	-0.331006	11.6517	HDGFRP3;RFX1;ISL1;AR;NEBL;FLI1;EIF5;PELI2;BNIP3L;FOXP2;DLX1;DLX2;ZFP467;BCL2L11;SP1;PRCC;CXXC4;ZNRF2;HHIP;CALN1;FOXG1;ZFP503;UBE2J1;FOXF2;PPP1R10;RAP2C;GRIP1;POU3F2;HMGA1;GSK3B;A330008L17RIK;ZIC1;OLIG2;CREB1;POLE3;SOX21;MYC;SOX11;PRDM16;FOSL2;REL;PHF6;PAX6;CDKN2C;NFIA;COL27A1;TPM1;CACNB2;CACNB3;PGR;TOX;MAFB;LHX6;EFHD1;CTDSPL;CEBPA;FBXL19;MARCKS;INSM1;SOX3;FRAT1;SOX9;EBF1;AU022252;CITED1;CITED4;NO…
MEF2A-21415370	81	1048	0.0658002	0.024915	0.0408852	4.10252e-14	-0.350919	10.8169	MDC1;MEF2A;RC3H1;RFX5;PBX1;PSMG3;EZH2;SHB;JPH3;4931428F04RIK;EGLN1;UBAP1;ZFP687;FOXP1;MDM4;CELF3;5730455P16RIK;TRIM67;SLC25A16;CYB5B;MARCKSL1;PRRX1;QK;ZFP503;6430548M08RIK;RAB11FIP3;MED13L;CALM3;CALM1;DIRAS1;MAP1LC3B;TACC1;ZFAND3;KHSRP;DDX6;CNN3;UBE2F;RBM34;RBM24;PDLIM5;SNTB2;PRR14;SLAIN2;PAFAH2;BTG2;ZEB2;ZFP143;HIPK3;MSRB3;ANKRD13A;CEP135;DYRK1A;CACNB2;ANKRD11;ANKRD10;ZFP592;ZFP523;LBH;DNMT3A;NF…
NANOG-21062744	76	840	0.0617384	0.01997	0.0417684	1.28304e-16	-0.244609	8.95078	MDC1;GMFB;LSM12;GBP5;DAXX;FRS2;BAZ2A;FLI1;SFXN3;TRP53BP1;ZSWIM4;EGLN1;CCDC9;YPEL2;PDCD7;SHC1;MAX;DLX6;STK35;ZKSCAN5;SP1;HMG20A;RAD23B;PPM1B;PRCC;SLC25A27;SLC25A36;CCNK;EPC1;CALM3;SERTAD2;TACC1;KHSRP;PHF12;HOOK1;GSK3A;ZMYND11;MAML1;BACH1;SOX12;RAB3IP;CPEB4;PHF23;TRIM8;ZFP146;ZFP143;ANKRD13A;SNRPN;FKBP5;CNOT6;PLEKHF2;ZFP523;ZC3H4;TRAF7;DNAJC5;LUZP1;ABLIM1;FBXL19;MARCKS;DIXDC1;MTUS1;NLK;ZRANB2;FUBP3…
NR0B1-18358816	123	1691	0.0999188	0.0402016	0.0597172	5.82638e-19	-0.205515	8.62889	CAPNS1;FRS2;ISL1;BAZ2A;NMT2;MTMR12;SNX11;SHF;TRP53BP1;YPEL2;MSI2;AMDHD2;BMF;SP3;BC052040;SNAP23;CCDC85A;CABLES2;NUDT4;ARL15;NUMBL;CEND1;BSDC1;MRPS12;AKAP12;SYNCRIP;MAP1LC3B;POU3F1;PPIF;RPP25;CNN3;COX10;MKRN1;LASP1;OLIG2;ETV4;TNIP1;CXX1B;PHC1;NFATC3;PAFAH2;BTG2;JARID2;RAB30;AP1G2;CRK;FBXL19;ASXL1;RPS6KA3;FRAT1;DCUN1D3;PARVB;FUBP3;CITED2;MTSS1;LPP;CBX7;POU2F1;SPRED2;SPRED1;SIX3;HLF;CDK2AP2;GBP5;MLL…
MYC-19079543	108	1458	0.0877335	0.0346623	0.0530713	2.95044e-17	-0.222581	8.47186	ATF2;GMFB;FNBP4;DAXX;ATF7;EIF5;SASS6;CTCF;SNX11;JPH2;UCP2;CCDC9;PDCD7;ZFP207;SLC25A42;MAX;MAZ;ATXN3;SOCS5;FOXN2;MDM2;MDM4;ARHGAP11A;EIF5A;ARL4C;CXXC5;SH2B3;EIF4B;UBQLN2;SLC25A36;NUDT3;EIF1A;PCBP1;RAB11FIP4;PPP1R10;6430573F11RIK;AKAP12;SYNCRIP;OTUD6B;2810004N23RIK;PTMA;ZFP704;SERTAD2;CSDC2;HDGF;RGS3;PHF12;HMGA1;SYT6;LMNB2;BCL7B;EPN1;TEF;ACIN1;RPL28;NOLC1;PHC1;CEP57;BTG2;BRD2;CHN2;ZFP146;ZFP143;RYB…
POU3F2-20337985	122	1702	0.0991064	0.0404631	0.0586433	2.37593e-18	-0.181198	7.35322	ATF2;NDST4;NEBL;EGLN1;TAOK3;FBXO28;STX7;DMTF1;DLX5;LIN7A;SP4;SP3;ZNRF2;NUDT3;CCDC91;ARL15;TTBK2;AKAP12;ZHX1;RAP2A;FGF14;DYRK2;NAV3;RNF6;GNG2;ATF7IP;MBNL1;MBNL2;FNDC3A;PRDM10;PHC1;PHF3;ZEB2;RUNX1T1;CDKN2C;ANKRD13C;RIMS2;DYRK1A;TOX;FKBP5;CCDC50;DIS3;MTPN;JAZF1;KRR1;ASXL2;ZZZ3;ICA1L;ZMAT3;POU2F1;TSGA10;TRPS1;MEF2A;RFX3;EML1;CGGBP1;UCK2;EFCAB2;FABP7;RORB;FOXP2;FOXP1;MAF;ATXN1;ARHGAP11A;RAD23B;PARD3B;…
TCF3-18692474	102	1351	0.0828595	0.0321185	0.050741	7.36473e-17	-0.188328	6.99588	ITSN1;CAPNS1;FRS2;PRKAR2A;UCK2;MTMR12;SNX11;SHF;MESDC1;CDC42EP3;TRP53BP1;YPEL2;PDCD7;ZFP219;FOXP4;FOXP1;MAX;STK35;BMF;ZBTB17;MCC;SP3;MDM2;FHL3;ARNT;SLC25A13;PRCC;SLC25A36;EPC1;ARL15;THAP2;WWTR1;ZFP512;SYNCRIP;RXRA;PLEKHA1;ZFP26;GRIP1;CNN3;UBE2H;PHF12;MKRN1;CHD7;LMNB2;LASP1;ETV4;GNG2;CD4;TNIP1;GABPB2;MAML1;BACH1;MYC;SOX13;UNC13D;PHC1;JARID2;PAX6;ZFP148;ZFP35;TPD52;SNRPN;FKBP4;ANKRD11;ANKRD10;MAFB;…
GATA2-20887958	128	1708	0.103981	0.0406058	0.0633747	1.0441e-20	-0.135699	6.24333	ITSN1;PKNOX1;ATF7;HEXIM2;D17WSU92E;SFXN3;TAOK3;CCDC9;CISH;STX7;BCAS1;MLLT1;CIZ1;CABLES2;IKZF1;TBC1D22B;6430548M08RIK;MED13L;GRB2;TOX2;HDGF;TACC1;OTUD5;UBXN2A;ZFAND3;TMOD2;PPIF;RPP25;LYL1;TBP;CUEDC1;CD4;WIPF2;GPATCH8;MBNL1;SCRIB;PHC2;ARPP21;PAFAH2;BTG2;GMEB1;4930539E08RIK;CDKN2D;DEF8;SYNJ2BP;ANKRD13A;TPM4;TPM1;FKBP5;BCL9;CCDC50;SGIP1;DNAJB2;SRRM1;CAGE1;DCUN1D2;KLHDC8A;ZCCHC14;CBFA2T3;BEGAIN;PPP2CB…
CNOT3-19339689	113	1547	0.0917953	0.0367782	0.0550171	1.32558e-17	-0.147067	5.71535	NEBL;PBX3;NEFH;ZSWIM4;SKI;MSI2;SNAP23;PTEN;MTHFSD;UBQLN1;E2F5;DBNDD2;TRIM39;EPC1;RAB27B;SH3RF1;MAP1LC3B;PRPF40B;PTMA;YAP1;TTC9;CNN3;LMNB2;TEF;SNTB2;ARMC7;SCRIB;PRKCZ;PRDM16;CEP57;ANKRD13C;SALL1;CEP135;COL27A1;TPM4;PGR;FKBP5;CBFB;PHACTR4;TFDP1;DNAJC5;DNAJC8;ABLIM2;RAB23;RFFL;SRRM2;SRRM1;AU022252;ZRANB2;FUBP3;KLHDC8A;FUBP1;NOL4;ARHGDIA;ZMAT3;MAP6D1;ZCCHC3;CASP9;SPRED1;RBMS2;WEE1;RBMX;DAXX;PRKAR2B;A…
SUZ12-18974828	136	1932	0.110479	0.0459311	0.0645482	9.35614e-20	-0.126938	5.56188	PKNOX2;HDGFRP3;ISL1;NEBL;PBX3;PLAGL1;SNX22;NAB1;DLX1;DLX2;ZFP467;DLX5;LIN7A;NKX3-1;0610040J01RIK;ZFP422;CCDC85A;DBNDD1;DBNDD2;IKZF1;KCTD12;ZFP503;ZBTB4;RAB27B;ZHX1;POU3F1;POU3F2;SYT6;FGF13;FGF12;ZIC1;SHROOM1;OLIG2;GNG4;ADARB1;PRKCE;PRDM16;NFATC2;FOSL2;CDKN2C;NFIA;FGF2;COL27A1;TPM1;VASH2;HIC1;PGR;TOX;DAB1;LHX6;LBH;CTDSPL;CEBPA;JAZF1;TUB;TRPM6;SNAP91;CITED1;FEZF2;ICA1L;NOL4;NLRP6;ZMAT4;MEGF11;SIX3;…
REST-18959480	159	2868	0.129163	0.0681834	0.0609798	4.63798e-14	-0.149434	4.58792	ITSN1;CAPNS1;PKNOX1;NEBL;PBX3;MAP3K9;MAP3K7;KCNH6;SP4;PTEN;TRIM44;NUDT3;NUDT4;6430548M08RIK;5730409E04RIK;MAP1LC3B;ZFAND3;GRIP1;POU3F2;TBC1D20;GPRIN1;RPP25;COX10;FGF14;FGF12;PLEK;RNF6;GNG2;GNG4;GNG8;BNIP3;TEF;PRKCE;ARMC7;CTBP1;PRKCZ;PRDM16;ARPP21;CIT;AEBP2;WDR25;FGD3;HIPK3;NFIC;FOSB;RIMS2;RIMS3;SALL1;DYRK1A;HIC1;RAB37;5031439G07RIK;BCL9;PLEKHF2;CCDC50;CTDSP2;ABLIM2;VAPB;TCERG1;PARVB;FUBP3;RNPS1;C…
GABP-19822575	181	2639	0.147035	0.0627392	0.0842957	4.63366e-25	-0.079966	4.4806	CAPNS1;FRS2;RC3H2;SNX12;MED15;EPS15L1;MED22;MBD1;CCDC9;TAOK1;PDCD7;FBXO28;MAP3K7;DMTF1;SHC1;SP2;SP3;SNAP23;MLLT1;MTHFSD;U2AF2;E2F6;EIF4B;MARCKSL1;CABLES2;TRIM39;TMEM170B;EPB41;ZBTB4;GRB2;OTUD7B;THTPA;PCYT1A;RAP2C;KIF9;PTMA;AGGF1;OTUD5;ZFAND3;TBC1D20;PPIF;GRK5;COX10;UBE2F;MKRN1;HP1BP3;TBP;GFOD2;RNF6;FBRS;CYTH1;BNIP3;WIPF2;GPATCH8;FAM122B;ARMC7;CTBP1;PRDM15;BCL10;MTF1;NR1H2;NFIC;FOSB;SNRPN;TPM1;CBF…
RUNX1-20887958	91	1120	0.0739236	0.0266267	0.0472969	6.08221e-17	-0.0694732	2.59403	PKNOX1;HEXIM2;BTBD19;MRVI1;TAOK3;SCMH1;ZBTB34;FOXP4;AMDHD2;FHL3;EIF5A;VPS37C;ARNT;CXXC5;ZNRF2;BEND4;SH2B3;FBXO9;EIF1A;RAB11FIP3;EAF1;ICK;WNK1;CALM1;RCOR1;KIF9;TOX2;FKBP1A;HDGF;UBXN2A;TMOD2;OSCAR;PPIF;RPP25;BCL9L;UBE2F;HMGA1;CHD9;PRR3;LYL1;TCTE1;NUP50;CUEDC1;FBRS;FNBP1L;GPATCH8;ARMC7;SCRIB;SLAIN2;PAFAH2;GMEB1;FAM102B;BRD2;SIKE1;RNF166;GAS7;ZFP143;CDKN2D;ZYX;MSRB3;FAM107B;ZFP35;GRB10;ANKRD13A;TPD52…
FLI1-20887958	146	2030	0.118603	0.0482609	0.0703418	5.4816e-22	-0.0392157	1.91982	FNBP4;FRS2;BTBD19;SFXN3;SNX11;EGLN2;TAOK3;CCDC9;PDCD7;FBXO28;MAP3K7;CISH;SHC1;ZKSCAN5;PTEN;ZFP422;CIZ1;GM7367;CCDC94;TBC1D22B;6430548M08RIK;ZFP512;THTPA;CTTNBP2NL;KIF9;PTMA;PCNP;OTUD4;OTUD5;ZFAND3;PPIF;UBE2F;PLEK;LYL1;TBP;EPN1;CNST;PRKCE;ARMC7;BCL10;PHC2;PAFAH2;PHF23;SIKE1;ZEB2;RARA;ZFP384;NR1H3;ANKRD13C;TPM4;FKBP8;LBH;AP1G2;CCDC50;SGIP1;CTDSPL;DNAJC5;DNAJB2;ABLIM2;RAB23;KRR1;AU022252;ZNHIT6;ZRAN…
TBX5-21415370	146	2296	0.118603	0.0545848	0.064018	1.6959e-17	-0.0449251	1.73482	GMFB;AKT1;SNX11;EPS15L1;MED22;PPARD;TAOK3;PSKH1;DMTF1;4930452B06RIK;MTHFSD;E2F6;EIF4B;TRIM39;CCDC94;CEND1;5730409E04RIK;OTUD7B;ZHX3;CTTNBP2NL;RAP2A;KIF9;AI837181;YAP1;TACC1;CRTC3;COX6B2;PPIF;MXD1;LASP1;TBP;GFOD2;PRKCE;ATG12;HMOX1;BTG2;RARA;RUNX1T1;DEF8;ANKRD13A;RAB37;FKBP8;FKBP4;5031439G07RIK;SLC7A6OS;CCDC50;DIS3;TFDP1;LCORL;ABLIM1;CCDC71;ARRDC4;SRRM1;PUM2;ZZZ3;CITED2;LIMD1;ZCCHC14;PPHLN1;EME2;PX…
TET1-21451524	132	1839	0.10723	0.0437201	0.0635098	7.52351e-20	-0.033274	1.46517	ALKBH8;ZC3H12C;FAM110B;SF1;NMT2;TAOK3;LIMS2;MSI1;CISH;STX7;DMTF1;SHC1;DLX5;DLX6;SLC9A3R1;BMF;EIF5A;MTHFSD;ATXN1L;CERK;NUDT3;ATXN7L3;SMARCC2;CCDC86;KCTD11;FBF1;GRB2;DHRS11;MRPS12;SYNCRIP;MAP1LC3B;CTTNBP2NL;CNKSR3;AI837181;TBC1D20;MKRN1;HP1BP3;LMNB2;ETV4;ZMYND11;1700003E16RIK;POLE3;WIPF2;CTBP1;BCL10;PRKCZ;PHC2;NFATC3;PAFAH2;MEX3A;GMEB1;ZFP385A;RUNX1T1;RRP1B;RIMS3;LARP4B;PYGO2;ZFP358;SLC7A6OS;MAP3K1…
LYL1-20887958	68	752	0.0552396	0.0178779	0.0373617	5.48941e-15	-0.035604	1.16909	ATF2;FNBP1L;GPATCH8;ZDBF2;PKNOX1;EML1;PRR18;SLAIN2;GIGYF2;HEXIM2;PAFAH2;BTG2;GMEB1;RNF166;4930539E08RIK;CDKN2D;CCDC9;ZYX;MSRB3;SCMH1;PHLDA1;ANKRD13A;PHLDA3;TPM4;STX7;TPM1;RHCG;SOCS5;ESRRB;ZFP592;FHL3;SGIP1;ZFP651;CEBPA;ZFP422;WBP2;MLLT1;CXXC5;PRRX1;PKD2L2;CHAC1;SOX5;ZFP3;COG3;EAF1;RASSF8;ICK;TMCC3;MRPS12;TOX2;DCP2;AKAP5;PTS;FAM196B;HDGF;UBXN2A;CWC25;PALM;TMOD2;PPIF;RPP25;LPP;ZFP36L2;PICALM;CHD9;Y…
YY1-21170310	49	464	0.039805	0.0110311	0.028774	2.13206e-13	-0.00018036	0.00526227	FNBP4;DAXX;PRR14;TSPYL5;MLLT11;CPEB4;SNX11;4930539E08RIK;ZFP260;ZFP143;CDKN2D;ZFP207;EIF4ENIF1;RAB30;2810403A07RIK;ZBTB17;SP1;SP3;ZFP64;BC052040;CELF5;U2AF2;E2F3;BAK1;FBXL19;TNRC6B;NUDT4;FRAT1;THAP1;PCBP1;N4BP1;CALM1;PPP1R10;MAP1LC3B;PTMA;STX12;BC005624;HSF1;SHOC2;MTX3;E430018J23RIK;COX10;MKRN1;2310036O22RIK;GAP43;AKT1S1;DCX;GNG4;ATF7IP
SIN3B-21632747	357	4302	0.290008	0.102275	0.187733	7.7457e-72	0	0	ITSN1;EPSTI1;SF1;PBX3;PBX1;SNX11;BBC3;SHF;BC048403;EGLN2;SKI;PDCD7;MAP3K9;MAP3K7;KCNH6;3-SEP;BMF;SP4;SP3;4930452B06RIK;PTEN;TRIM67;BCAS1;MSL2;ARL4C;SRSF1;U2AF2;UBQLN4;ZFP503;6430548M08RIK;ZFP512;MED13L;ITGBL1;SYNCRIP;PCYT1A;RNF144B;RAP2A;FAM196B;FAM196A;HDGF;GRIP1;TMOD2;COX10;FGF14;LMNB2;LMNB1;LASP1;ZIC1;TBP;OLIG2;GFOD2;1700003E16RIK;TEF;POLE3;WIPF2;MBNL2;PRDM16;MEX3B;MEX3A;4933404O12RIK;MTF1;RAR…
FOXP3-21729870	119	1404	0.0966694	0.0333785	0.0632909	2.77446e-23	0	0	MDC1;GMFB;CAPNS1;PKNOX1;DAXX;RFX3;ATF7;LARP1;HMGXB4;HEXIM2;SASS6;LRRC1;MED22;MBD5;GATAD2B;TAOK3;CCDC9;LIMS1;NAB1;ZBTB26;MAP3K7;FOXP4;FOXP1;UBFD1;STK35;BMF;SP2;MDM2;ARHGAP11A;PTEN;PRCC;TRIM44;CABLES2;NECAP1;FAM53C;CCDC94;TMEM170B;ZBTB4;PCBP1;SURF6;GRB2;MRPS12;RSRC1;TOX4;KIF9;RAP2A;PTMA;STX16;PCNP;MNT;CCNYL1;HDGF;ZFAND3;UBE2F;UBE2I;HOOK1;RBM27;PSIP1;TBP;GOSR1;POLE3;WIPF1;RNF114;PRKCE;ATG12;NOLC1;PR…
SMAD4-21741376	169	2738	0.137287	0.0650928	0.0721939	5.19934e-19	0	0	FAM110B;EPSTI1;PKNOX2;FNBP4;FRS2;ISL1;NEBL;PBX3;NMT2;MTMR12;SNX11;SHB;BBC3;PLAGL1;ZSWIM4;MBD5;YPEL2;MAP3K7;CISH;DMTF1;DLX1;DLX2;INO80D;SLC9A3R1;SP3;BCAS1;TRIM67;E2F3;CIZ1;TBC1D22B;FAM78B;SH3RF1;PRPF40B;TOX2;HDGF;GRIP1;PPIF;FGF13;FGF12;ZIC1;CUEDC1;GNG2;GNG4;CYTH1;ARMC7;PRDM16;PHC2;NFATC2;PAFAH2;FOSL2;BTG2;GMEB1;RARA;GAS7;RUNX1T1;COL27A1;CEP135;SNRPN;TPM1;HIC1;RAB37;FKBP5;DAB1;LBH;DNAJB2;STOX2;ABLI…
SPI1-20176806	116	1654	0.0942323	0.039322	0.0549104	7.71581e-17	0	0	ITSN1;ZC3H12C;FAM110B;SF1;BAZ2A;LARP1;HEXIM2;NMT2;PLSCR3;SNX22;TAOK1;DLX2;SLC9A3R1;SP1;EIF5A;MLLT1;IKZF1;CCDC86;DHRS11;SYNCRIP;RNF144A;AGGF1;MKRN1;CYTH1;TNIP1;POLE3;WIPF1;WIPF2;ARMC7;CTBP1;ZFP385A;SYNJ2BP;SALL1;COL27A1;VASH2;5031439G07RIK;SLC7A6OS;TLK1;CRK;FBXL19;ASXL1;ASXL2;DCUN1D3;C2CD4C;PARVB;ZZZ3;CBFA2T3;PURB;KLHDC1;CASP9;SPRED2;2310036O22RIK;CDH15;WEE1;LSM12;DAXX;RFX1;FLI1;LITAF;PELI1;EIF4EN…
PADI4-21655091	81	1037	0.0658002	0.0246535	0.0411467	2.4282e-14	0	0	FAM110B;ATF7;SF1;BAZ2A;SHC1;UAP1;LIN7A;SOCS5;MCC;SP1;SP3;ARHGAP11A;BCAS1;VEZF1;PPM1B;SLC25A19;PRCC;UBQLN1;TRIM39;CCNK;FAM53B;TMPO;THAP2;ZBTB4;EAF1;BSDC1;CALM3;PPP1R10;OTUD6B;ZHX3;PTMA;SERTAD4;ZFAND3;DOK5;CCDC149;PHF12;GSK3B;DYRK2;PRR3;UBE2Q1;RBM34;TCTE1;GOSR1;RNF6;MYC;MBNL1;RPL28;CDC42SE1;PHC1;SETD1A;FOSL2;BTG2;CLINT1;BRD2;AHR;ANKRD13A;MITF;RAB30;WDR4;ZFP91;WBP4;WASF3;KRR1;TNRC6B;GOLGA5;FAM43A;DA…
CEBPB-20176806	104	1588	0.0844842	0.0377529	0.0467313	1.97827e-13	0	0	ITSN1;SF1;LARP1;HEXIM2;MRVI1;SNX22;SKI;CISH;LY6E;DLX2;SLC9A3R1;MLLT1;ZNRF2;CIZ1;IKZF1;SMARCC2;CCDC86;FAM76A;GRB2;ZHX1;PLEK;LMNB2;4833422C13RIK;TNIP1;WIPF2;MEX3B;PHF23;4933404O12RIK;GAS7;ZFP384;SYNJ2BP;SALL1;COL27A1;VASH2;LARP4B;PYGO1;RAB37;TPPP;PLEKHF2;DNAJC5;STOX2;ASXL2;TNRC6B;SRRM2;DCUN1D3;C2CD4C;ZZZ3;UBXN1;CBFA2T3;ICA1L;RPRD1B;YBX2;2310036O22RIK;CDH15;WEE1;CDK2AP2;DAXX;MLLT11;UCK2;JPH2;PELI1;F…
TFEB-21752829	66	808	0.0536149	0.0192093	0.0344057	1.03363e-12	0	0	FNBP4;RC3H2;GIGYF2;MED13;SRRD;ACAP2;LRRC58;PFKFB2;DLX2;MAX;AMDHD2;SOCS5;CELF1;FOXM1;RAD23A;SLC25A13;SH2B3;EIF4B;SLC25A36;EPC1;AKR1A1;CCNYL1;HDGF;ZFAND3;KHSRP;PICALM;NAA40;UBE2Q1;RBM18;ATF7IP;TEF;UNC13D;HMOX1;CPEB4;CEP57;TRIM2;CDKN2C;HINFP;DYRK1A;FKBP5;CDK4;PLEKHF2;SGIP1;ZFP91;TRAF7;DNAJC8;GTF2A1;WBP2;ASXL2;TNRC6B;SOX2;GOLGA4;TBCEL;EIF5A2;ZNHIT6;ZZZ3;FUBP1;UBXN1;CDV3;NFX1;ARHGDIA;TUG1;AKT1S1;MOSPD…
JUN-21703547	101	1585	0.0820471	0.0376816	0.0443655	2.06272e-12	0	0	NDST4;EPB41L2;SHB;TAOK3;FBXO28;SP4;MLLT1;MTHFSD;E2F3;NECAP2;CERK;NUDT4;CCDC91;LGALS9;FBXO9;FAM78B;RAB27B;SYNCRIP;MAP1LC3B;RAP2A;ZFAND3;POU3F1;UBE2F;HOOK3;FGF13;ZIC3;SHROOM4;NAV3;RNF6;MBNL2;PRKCE;PHF6;CDKN2C;PCGF3;TPMT;RIMS2;DYRK1A;BCL9;LBH;SGIP1;CTDSP2;LCORL;ABLIM2;RAB23;VAPA;TCERG1;RPS6KA3;ZCCHC14;CHMP1B;RALGPS2;MRFAP1;LPP;SPRED2;SIX3;COL6A3;FAM84B;DEK;WEE1;PPP2R2C;RBMX;SAMD12;RFX3;FLI1;UCK2;EZH…
SIN3A-21632747	83	1186	0.0674249	0.0281958	0.0392291	2.66431e-12	0	0	MDC1;RBFOX3;RFX1;CGGBP1;RHBDL3;BTBD19;MLLT11;SASS6;BBC3;JPH4;BC048403;ZFP260;EGLN2;SKI;TTLL9;AMDHD2;CELF4;FHL3;SLC25A16;CYB5B;PBLD2;CCDC91;ULK3;ZFP930;PCYT1A;ENAH;KIF9;DOT1L;CRIP2;MNT;HSF1;OTUD4;TBC1D12;MKRN1;NAA40;CHD9;PRR3;UBE2Q1;TCTE1;FBRS;POLE3;CNST;TSPYL1;ARMC7;CDC42SE1;SLAIN2;HMOX1;THAP11;CPEB4;MTF1;NR1H3;FOSB;RIMS2;FKBP8;RHCG;ZFP346;CBFB;ZFP598;DUSP18;JAKMIP1;GOLGA5;HABP4;SRRM4;RRAGD;FAM43…
SMAD3-21741376	86	1460	0.0698619	0.0347098	0.0351521	3.41784e-09	0	0	ZC3H12C;EPSTI1;FNBP4;LARP1;NEBL;SNX11;SHB;BBC3;CDC42EP3;PLAGL1;MBD5;YPEL2;MAP3K7;FOXP2;MAF;DMTF1;INO80D;SLC9A3R1;STK35;SOCS6;MCC;SP2;BCAS1;SLC25A19;SLC25A13;SH3BP5;E2F3;TBC1D22B;WNK1;TOX2;STX17;CAMKK2;TACC1;HDGF;GRIP1;PPFIA4;DOK5;PPIF;DDX6;KLHL14;BCL9L;FGF13;NAV3;CUEDC1;GNG2;GNG4;TNIP1;SOX21;ARMC7;PHC2;NFATC2;CPEB4;FMN1;TRIM2;TESC;PAX6;GAS7;RUNX1T1;SALL1;TPM1;HIC1;RAB37;ANKRD11;RASAL2;DAB1;EFHD2;…
PPARG-20176806	58	837	0.0471162	0.0198987	0.0272174	7.6645e-09	0	0	ITSN1;BAZ2A;UCK2;MRVI1;SHB;RCSD1;SNX22;CCDC6;TTLL9;GM10052;MYLIP;SLC9A3R1;SOCS6;SOCS7;HMG20A;EIF5A;NAF1;MLLT1;MTHFSD;NECAP1;RASSF5;ARL15;FBF1;RASSF8;GRB2;OTUD7B;WASL;RNF144B;PALM;PICALM;LMNB2;OLIG2;CYGB;TNIP1;MAML1;RNF114;PRKCE;GMEB1;BRD2;C530008M17RIK;CDKN2D;RIMS3;PHLDA1;MAGI2;RAB37;CSNK1G2;DNMT3A;SOS1;MTPN;MTUS2;PARVB;KLHDC8A;DTX4;RPRD1B;KLHDC1;YBX2;OXSR1;WEE1
GATA2-21666600	57	837	0.0463038	0.0198987	0.0264051	1.81502e-08	0	0	ITSN1;SAMD14;HDGFRP3;VTI1A;FLI1;SFXN3;NMT2;RCSD1;MECP2;CNOT6L;PPARD;TAOK3;SCMH1;BCL2L11;ATXN7;FHL3;PIK3CA;HHIP;PIK3R1;XRCC2;EAF1;ITGBL1;GRB2;SH3RF1;RNF144B;HSF1;FKBP1A;RGS3;PHF12;PICALM;RBM27;CHD9;LYL1;CYTH1;MBNL1;PAFAH2;BTG2;JARID2;RARA;PRUNE2;RASAL2;CTDSPL;CRK;WBP2;HDAC7;ABLIM1;NHS;VAPA;INPP5F;MAP4;TRPM6;CBFA2T3;AKAP5;FAM81A;DTX4;ZCCHC2;FAM168A
FOXP2-21765815	59	1164	0.0479285	0.0276728	0.0202557	6.83171e-05	0	0	CHIC1;EPSTI1;ISL1;SF1;EZH2;JPH4;JPH3;STX7;BCL2L11;FOXN2;ZNRF2;U2AF2;CIZ1;SLC25A36;CCDC91;QK;EIF1A;6430548M08RIK;PIK3R1;ZFP512;PPP1R10;SUV39H1;SERTAD4;POU3F2;UBE2F;GSK3B;PRR3;LMNB1;TCTE1;ACIN1;FNBP1L;CXX1A;REL;CIT;ZFP148;NFIA;MSRB3;CACNB3;RAB30;2810403A07RIK;TNKS;MAFK;OPA3;TLK1;MTPN;NFAT5;RPS6KA3;SOX5;MTUS1;SIAH2;CITED2;2310057M21RIK;KCTD8;LPP;POU2F1;REPS2;TCFL5;NAP1L5;CDK2AP2
NOTCH1-21737748	17	245	0.0138099	0.0058246	0.00798531	0.00148316	0	0	MYC;YOD1;MEPCE;PCBP3;PAFAH2;ZZZ3;RNF144A;NAB1;PHLDA3;PFKFB2;GRK5;MAFB;ZMYND11;CRK;E2F6;TRIM39;TNRC6B
IRF8-21731497	20	319	0.016247	0.00758386	0.00866309	0.00188364	0	0	WIPF1;CARHSP1;TLN1;CDC42SE1;HMOX1;N4BP1;OTUD7B;GRIPAP1;ZFX;MNT;SH3BGRL;NSD1;UCP2;EIF4ENIF1;PXK;MXD1;PLEK;VEZF1;MARCKSL1;NECAP2
IKZF1-21737484	11	155	0.00893582	0.00368495	0.00525088	0.00816824	0	0	CALN1;CGGBP1;PRKAR2B;FAM43A;SOCS5;PHC2;ARHGAP30;MEGF11;PCNP;RAB23;MEIS2
MYBL1-21750041	9	161	0.00731113	0.00382759	0.00348354	0.0547413	0	0	ZFAND3;ZFP207;RFX5;CGGBP1;LIN7A;FGFR1OP;PHF23;RALGPS2;KLF9
ZNF652-21678463	6	112	0.00487409	0.00266267	0.00221141	0.120616	0	0	SLC25A42;FOXP1;PPP1R10;DUSP10;TRPS1;CRIP2
TRIM28-17542650	58	3568	0.0471162	0.0848251	-0.037709	1	7.24145	-1.03075e-06	NEBL;CCDC6;BMF;SP4;RAP2A;FGF14;MKRN1;OLIG2;BNIP3;GAS7;NFIA;FGF2;BCL9;MTPN;PARP4;THRB;DEK;LAD1;FOXP1;FOXJ2;CHD7;GLI3;EVL;NHS;INSM1;SOX1;SOX8;SOX9;DTX3;ISL1;DLX1;DLX2;DLX5;DLX6;AGGF1;PPIF;UBE2H;HOOK1;DYRK2;SALL1;RAB30;VAPB;LMO3;LEF1;WEE1;RORA;CALN1;XRCC2;NCS1;PRKX;GSK3B;CREB1;NUP50;SOX21;BRD2;PAX6;AHR;TMCC3
SOX2-18555785	49	497	0.039805	0.0118156	0.0279894	2.13311e-12	0.0268077	-0.720414	MDC1;ATG12;PHC1;PAFAH2;UCK2;MTMR12;SNX11;SHF;TRIM8;4931428F04RIK;JARID2;CIT;TRP53BP1;ZFP207;SALL1;TPD52;CSNK1G2;LY6E;STK35;BMF;SP3;ZFP64;BC052040;ZFP668;TRIM44;FBXL19;ASXL1;INSM1;ZFP553;SLC25A36;BSDC1;FUBP1;CALM3;CITED2;ZCCHC14;PTMA;ZFP704;CRIP2;PLEKHA1;BASP1;LPP;MKRN1;GSK3A;CHD7;SPRED1;KLF16;EFS;GNG8;PDLIM5
MYCN-19997598	6	234	0.00487409	0.00556308	-0.000688998	0.680465	2.39022	-0.920184	RUNX2;RFX5;JPH4;ZHX3;PRCC;TUB
ESR1-15608294	2	98	0.0016247	0.00232984	-0.000705143	0.780935	4.0532	-1.00221	PGR;PTMA
NANOG-16518401	164	3520	0.133225	0.083684	0.049541	6.23863e-09	0.0694103	-1.31133	CAPNS1;PBX3;BBC3;PLAGL1;TRP53BP1;MAP3K7;PTEN;E2F5;UBQLN4;TRIM44;GRB2;MRPS12;SYNCRIP;PCYT1B;RAP2C;PTMA;COX10;FGF14;MKRN1;LMNB1;LASP1;ZIC3;BNIP3;FOSB;RIMS2;TPM4;TPM1;FKBP4;TOX;FKBP5;PPHLN1;PPP2CB;NUPL2;RALBP1;LPP;ZMAT4;RABEP1;SNCB;AR;CGGBP1;PRKAR2A;VTI1A;UCK2;FOXP4;FOXP1;BCL2L11;STK35;FOXN2;MDM2;MDM4;RAD23B;SLC25A13;QK;RAB11FIP4;RCOR1;ENAH;SERTAD2;PSIP1;BCL7A;BCL7B;MYC;GLI3;ZFP148;CHN2;ZFP143;ABI2;…
GATA2-21571218	89	1111	0.0722989	0.0264128	0.0458862	2.99023e-16	0.0397074	-1.41938	RFX3;RFX1;AGAP3;VTI1A;FLI1;PBX1;MED15;EFCAB2;GATAD2B;GATAD2A;FBXO28;MSI2;EIF4ENIF1;BNIP3L;SH3GLB2;ITGAM;SNAP23;KSR1;PRCC;CXXC5;U2AF2;SH3BP5;E2F3;SH2B3;IKZF1;CCDC91;EPC1;ULK3;PCBP3;RAB27B;CALM1;MNT;RXRA;CRTC3;RGS3;GPRIN1;LSM14B;RBM27;LASP1;ARHGEF19;RNF6;SNTB2;ADARB1;UNC13D;BCL10;FAM149A;RRP7A;CPEB4;CIT;PLCB2;FGD3;WWOX;RYBP;CACNB2;TOX;AKIRIN2;LHX6;NF2;RNF187;ANKRD33B;DUSP10;PSD2;EFHD2;DNMT3A;EVL;LC…
GATA1-19941827	128	1834	0.103981	0.0436013	0.0603792	2.3937e-18	0.0453444	-1.83979	ITSN1;ALKBH8;CAPNS1;AKT1;MEPCE;HEXIM2;PBX1;MRVI1;PLSCR3;EGLN1;TAOK3;CCDC6;LIMS1;BNIP3L;KCNH6;CISH;STX7;SP4;NECAP2;IKZF1;NUDT3;GRB2;PCYT1A;RNF144B;TOX2;HDGF;OTUD5;ZFAND3;RPP25;GRK5;PLEK;LYL1;CUEDC1;WIPF1;WIPF2;MBNL1;PRKCE;CTBP1;PRKCZ;ARPP21;CEP57;BTG2;CIT;RARA;GAS7;CDKN2D;DEF8;NFIA;UBP1;TPM1;DYRK1A;BCL9;PHACTR4;TFDP1;ABLIM1;FBXL19;TNRC6B;DND1;PARVB;ZZZ3;RALGPS1;CBFA2T3;MTSS1;NFX1;ICA1L;NFYA;MEGF11…
NANOG-18555785	51	542	0.0414297	0.0128854	0.0285443	3.73757e-12	0.0783491	-2.06157	RABGEF1;RFX1;PRR14;ASF1B;SASS6;CPEB4;MTMR12;SHF;ZFP148;RUNX1T1;GATAD2A;SLMAP;ZFP687;SNRPN;ZFP219;2810403A07RIK;FKBP5;ZFP106;STK35;SP2;DUSP10;HMG20A;TRAF7;TNRC6B;PKD2L2;SOX2;EPC1;CHAC1;KRT1;FUBP3;SYNCRIP;MAP1LC3B;CHMP1B;PPHLN1;MTSS1;TOX4;ZFP704;ZFP710;MRFAP1;NUCKS1;BASP1;KHSRP;FIZ1;LPP;MKRN1;MXD1;CHD9;SPRED1;HLF;CDK2AP2;SNTB2
STAT3-20064451	102	2202	0.0828595	0.05235	0.0305094	7.31983e-06	0.192595	-2.27743	ZC3H12C;LARP1;PBX1;D17WSU92E;MED13;CNOT6L;TAOK1;FBXO28;LY6E;SP4;SP3;ITGAM;ZNRF2;UBQLN4;IKZF1;EIF1A;ZFP512;GRB2;TOX2;PTMA;CCNYL1;AGGF1;TACC1;DDX6;UBE2H;DYRK2;ZMYND11;GNG2;ATF7IP;FNDC3A;BCL10;FOSL2;MEX3A;BTG2;GMEB1;JARID2;AEBP2;FKBP5;TLK1;SGIP1;CTDSP2;JAZF1;KRR1;PANK3;HECA;KLHDC8A;CITED2;ZCCHC14;GLTSCR1;ICA1L;2310057M21RIK;PMAIP1;SPRED2;OXSR1;WEE1;MDC1;MEF2A;PRKAR2B;FLI1;EZH2;JPH3;GATAD2A;SPSB1;MAF…
MYB-21317192	75	923	0.0609261	0.0219433	0.0389828	3.62786e-14	0.0884381	-2.73694	FRS2;RFX5;LARP1;UCK2;SNX11;CDC42EP3;PPARD;EGLN1;SLMAP;FBXO28;FOXO3;BCL2L11;AMDHD2;0610040J01RIK;SMAP2;IKZF1;NUDT4;FBXO9;KCTD12;EIF1A;N4BP1;CALM3;CALM1;DHRS11;MAP1LC3B;GRIPAP1;SERTAD2;TACC1;OTUD4;PALM;UBE2H;1810013L24RIK;MKRN1;CHD9;HP1BP3;CHD7;PLEK;SNTB2;WIPF1;FNBP1L;BACH1;MYC;PAFAH2;FAM102B;ZEB2;NFIC;ZYX;PHLDA1;ANKRD13A;MITF;RAB37;FKBP5;ZFP106;UBE2CBP;BAG5;PLEKHF2;JAZF1;KLF3;KLF9;SRPK2;ZRANB2;GNG…
ZNF274-21170338	12	327	0.00974817	0.00777405	0.00197412	0.260228	2.10751	-2.83712	SOX5;THTPA;JPH4;EFCAB2;SYNJ2BP;SOCS6;HMGA1;TAB2;USP31;CELF2;SPRED2;OLIG2
CREB1-15753290	33	957	0.0268075	0.0227516	0.00405589	0.197478	1.80415	-2.92657	EIF5;PPARD;MAP3K7;BNIP3L;DMTF1;DLX2;SP2;SLC25A19;PRCC;UBQLN1;XRCC2;MRPS12;PCNP;ZFP26;UBE2H;TBP;GOSR1;POLE3;RPL28;PAFAH2;MTF1;SF3B2;WDR4;OPA3;DIS3;WBP4;AP3M1;TCERG1;GOLGA5;TLN1;NFYA;PMAIP1;CBX5
GATA1-19941826	69	967	0.056052	0.0229893	0.0330627	8.94475e-11	0.135517	-3.13551	RFX1;LARP1;PRKAR2B;SNX11;RCSD1;SNX22;SLC25A42;BNIP3L;MYLIP;MAF;FOXO3;TRIM67;KSR1;NAF1;CXXC5;PARD6B;SH3BP5;SH2B3;NUDT3;TBC1D22B;ARL15;EPB41;PIK3R1;BSDC1;MED13L;RXRA;PPFIA4;RPP25;UBE2H;CLK3;PICALM;LYL1;BCL7B;TNIP1;UNC13D;NFATC2;FOSL2;MEX3B;CPEB4;BTG2;JARID2;TESC;PHLDA1;COL27A1;FKBP8;DAB1;MAFK;RNF187;LBH;TLK1;DNAJB2;KLF9;TNRC6B;GOLGA4;NLK;UBAC1;FUBP3;RHOH;CBFA2T3;MTSS1;CUX1;DLC1;SYDE2;RAI14;ZFP36L2;…
FOXP3-17237761	10	257	0.00812348	0.00610988	0.00201359	0.231274	2.25929	-3.30795	GBP5;RFX3;FRS2;RHOH;PELI1;AHR;UBE2H;TLK1;KLF3;ASXL1
STAT4-19710469	109	1939	0.0885459	0.0460975	0.0424484	3.11793e-10	0.155759	-3.40935	B230219D22RIK;D17WSU92E;CISH;SLC9A3R1;EIF5A;ZNRF1;E2F3;CABLES2;NECAP1;TRIM39;CTTNBP2NL;RAP2A;OTUD4;1810013L24RIK;DYRK2;HP1BP3;GNG8;ATF7IP;ADARB1;MBNL2;PRDM15;NFATC3;FOSL2;PHF23;PHF6;AEBP2;RARA;CDKN2D;NFIA;RAB37;ZFP346;CBFB;LHX6;4931414P19RIK;DNAJC5;FBXL19;ASXL1;TNRC6B;RPS6KA3;SRRM1;TRPM6;4833439L19RIK;VGLL4;PTS;LPP;SPRED2;SPRED1;TRPS1;DEK;MDC1;GBP5;EZH2;EFCAB2;MESDC1;ARF6;1600014C10RIK;GATAD2A;EI…
CIITA-18437201	2	59	0.0016247	0.00140266	0.000222037	0.520773	5.46428	-3.56512	ZFAND3;DLX6
CTNNB1-20615089	24	637	0.0194963	0.015144	0.00435239	0.134765	1.8764	-3.76073	DAXX;SOX10;ATG12;PHF23;RNF166;FOSB;SNRPN;MAZ;FOXO3;MDM2;BCAS1;ZNRF1;SH2B3;TRIM39;TLN1;DCUN1D2;ZBTB4;RBM12;PPP1R10;CBFA2T3;ENAH;RBM15B;SPRED1;CHMP5
POU5F1-18358816	61	753	0.0495532	0.0179017	0.0316515	1.03637e-11	0.187066	-4.7314	PRKCE;SOX13;PHC1;UCK2;CTCF;SNX11;LRRC1;4931428F04RIK;JARID2;PAX6;PPP1R8;TRP53BP1;ZFP146;CDKN2C;NFIA;ZFP687;SALL1;MAP3K7;ZFP219;MAF;ZFP346;DLX5;MAX;ANKRD10;DAB1;ZFP64;DNAJC8;ZFP668;ASXL1;KLF9;NUDT3;SOX2;EPC1;SRRM2;FBF1;CEND1;SURF6;SNAP91;FUBP3;RSRC1;PCYT1A;PPHLN1;MTSS1;ZFP704;BC005624;AGGF1;NUCKS1;RAI14;CNN3;ZMAT3;CBX7;CBX5;CHD9;SPRED1;ETV4;NUP50;GOSR1;ATF7IP;CAPN10;POLE3;SPRY2
SCL-19346495	32	252	0.0259951	0.00599101	0.0200041	4.67736e-11	0.218696	-5.20184	RABGEF1;MBNL1;RUNX2;PIK3R1;RAB11FIP3;FLI1;MRVI1;CTCF;JARID2;CBFA2T3;TOX2;ZEB2;RXRA;WWOX;1600014C10RIK;HDGF;EIF4ENIF1;RPP25;RAI14;FOXO3;ZFP36L2;MAFK;PLEK;LYL1;SPRED1;PSD3;GFOD2;CUEDC1;CEBPA;PRCC;CXXC5;ZNRF1
RUNX1-17652178	72	1003	0.058489	0.0238452	0.0346438	2.68544e-11	0.223422	-5.43823	RFX3;EML3;SF1;FLI1;NMT2;LRRC1;PLAGL1;RORA;FOXP2;DMTF1;LY6E;DLX2;SOCS7;PTEN;HMG20A;EIF5A;PRCC;HHIP;RASSF4;RASSF5;UBE2J1;FOXF2;PCYT1B;PRPF40B;ZHX1;STX16;RXRA;HSF1;PLEKHA1;DOK5;GRK5;PHF12;H1F0;FGF13;GSK3A;PSIP1;ARHGEF12;OLIG2;NAV3;SNTB2;R3HDM2;PHC1;CPEB4;GLI3;JARID2;BRD2;PAX6;NSD1;SNRPN;TPM4;TPM1;RAB30;TOX;ANKRD10;GTF2A1;ABLIM1;VAPA;KRT1;RUNX2;TLN1;INPP5F;SRPK2;GNG12;SNAP91;RHOH;CBFA2T3;NANOS1;POU2F…
SOX2-19030024	66	863	0.0536149	0.0205168	0.0330981	1.51303e-11	0.223506	-5.56851	FNBP4;PBX3;MECP2;EFCAB2;MESDC1;TRP53BP1;SKI;ZFP687;MAP3K9;MAF;LIN7A;STK35;SP3;PTEN;0610040J01RIK;PIK3CA;CXXC4;ZNRF2;MMAB;IKZF2;KCTD12;WNK1;OTUD6B;RAP2C;PTMA;YAP1;MNT;ZFP710;POU3F2;DDX6;MXD1;PICALM;RNF6;ASF1B;PHC1;NFATC3;JARID2;ZFP143;UBP1;AHR;RIMS2;ANKRD10;DAB1;ZFP64;DUSP18;ZFP91;GTF2A1;RNF38;FBXL19;KLF3;VAPA;TNRC6B;SOX2;CSTF2;NLK;RALGPS2;BASP1;ARHGDIA;CBX7;SPRED1;KLF13;LEF1;MOSPD2;TOB2;WEE1;SPRY2
ZIC3-20872845	37	365	0.0300569	0.00867746	0.0213794	5.22754e-10	0.272369	-5.82105	SOX2;JMJD4;DAXX;FRS2;ISL1;KCTD12;VTI1A;PHC1;ARPP21;GRB2;PPP1R10;LRRC1;JARID2;RALGPS2;PAX6;RAP2A;AEBP2;MNT;TRP53BP1;GATAD2A;BASP1;TPD52;MAX;LPP;SLC9A3R1;STK35;ANKRD10;PHF10;SPRED1;ZFP91;CUEDC1;HLF;EIF4B;SMARCE1;ASXL1;KLF9;SPRY2
RNF2-16625203	84	1219	0.0682372	0.0289803	0.0392569	4.13585e-12	0.238718	-6.25712	MDC1;GMFB;ITSN1;HDGFRP3;ISL1;AR;PRKAR2B;NEBL;FLI1;4931428F04RIK;NEFH;PELI2;NUDT11;CISH;DLX1;DLX2;ZFP467;BCL2L11;TMEM28;HMG20A;CXXC4;ZNRF2;U2AF2;E2F6;HHIP;ZFP503;UBE2J1;FOXF2;POU3F2;RPP25;A330008L17RIK;ZIC1;OLIG2;CREB1;NUP50;CUEDC1;POLE3;SOX21;MYC;SOX11;FNDC3A;PRDM16;FOSL2;PHF6;PAX6;FIGN;CDKN2C;NFIA;NFIC;FOSB;MSRB3;SALL1;COL27A1;CACNB2;CACNB3;TOX;DAB1;MAFB;LHX6;EFHD1;CEBPA;MARCKS;INSM1;SOX3;FRAT1;…
HTT-18923047	26	566	0.021121	0.013456	0.00766503	0.0203695	1.61395	-6.28424	CHIC1;GBP5;SOX11;CPEB4;PELI1;PLAGL1;WWOX;AOC2;FABP7;ZFP207;PGR;ZFP109;ZFP523;FOXM1;PHACTR4;MTPN;FRAT1;EPC1;PCYT1B;SERTAD4;MIB1;PHF10;FGF12;NETO1;SNCB;DEK
GATA3-20176728	64	834	0.0519903	0.0198274	0.0321629	2.70714e-11	0.275166	-6.69548	CAPNS1;B230219D22RIK;BAZ2A;PRKAR2B;D17WSU92E;MRVI1;RCSD1;LITAF;LRRC1;VAMP2;UCP2;MBD1;SLMAP;ZFP207;EIF4ENIF1;SCMH1;SLC25A42;ZBTB39;CISH;KCNH6;SLC9A3R2;E4F1;MTHFSD;CIZ1;ITGBL1;6430573F11RIK;OTUD6B;CTTNBP2NL;CRIP2;POU3F1;PICALM;ZIC3;GOSR2;EFS;GOLPH3;TNIP1;MYC;CTBP1;JARID2;PAX6;AEBP2;GRAMD2;PPP1R8;AHR;FGF2;GRB10;AK1;BAG4;ESRRB;ZFP64;DUSP10;ZFP91;STOX2;GLTP;SRRM1;PRRC1;SRPK2;TMCC3;ARHGAP30;YBX1;USP12;…
CLOCK-20551151	42	407	0.0341186	0.00967596	0.0244426	2.15677e-11	0.273564	-6.71868	AKT1;MEF2A;SOX12;SF1;CYB5R3;EIF5;LITAF;SPSB1;FABP7;NAB1;BNIP3L;FKBP4;FKBP5;SLC9A3R2;SLC9A3R1;SP3;EFHD1;CEBPA;ZNRF2;SH3BP5;EIF4B;CYB5B;MARCKS;RUNX2;CARHSP1;TBCEL;BEX1;FUBP1;DAZAP2;TSC22D1;MTSS1;TBC1D20;UBE2H;H1F0;SPRED2;LASP1;SIX3;HLF;TOB2;CYGB;TEF;CDK2AP1
NOTCH1-17114293	7	134	0.00568643	0.0031857	0.00250074	0.108265	3.03023	-6.73674	OSCAR;EIF1A;PAFAH2;MED15;PHF6;SLC25A19;PRCC
TP63-17297297	2	40	0.0016247	0.000950955	0.000673741	0.336307	6.29637	-6.86135	PMAIP1;MDM2
CHD7-19251738	8	141	0.00649878	0.00335211	0.00314667	0.0633568	2.67988	-7.39373	ITSN1;EIF4ENIF1;FOXP4;MIER3;RAB11FIP3;ARHGAP26;SHROOM1;RBM39
HCFC1-20581084	16	306	0.0129976	0.0072748	0.00572276	0.0229903	1.96527	-7.41436	ALKBH8;SMARCC2;THAP11;ZFP219;PISD-PS2;PHF12;GSK3A;HMG20A;ZFP91;SLC25A19;LCORL;PRCC;RBM39;KRR1;FBXL19;ASXL1
MYC-18555785	84	1200	0.0682372	0.0285286	0.0397086	1.93488e-12	0.284035	-7.66069	SF1;UCK2;EIF5;SASS6;MESDC1;TCOF1;BNIP3L;ZFP219;LY6E;ATXN3;FOXN2;SP1;RAD23A;ZFP668;E2F3;TRIM44;FOXJ3;CCDC94;CCDC86;EIF1A;EAF1;AKAP12;OTUD6B;2810004N23RIK;YAP1;MNT;MIB1;FKBP1A;OTUD4;KHSRP;RPP25;COX10;PHF10;DDX46;RBM39;SCRIB;FNDC3A;SOX12;RPL28;NOLC1;HMOX1;AEBP2;SF3B2;PPP1R8;ZFP146;RNF141;SALL1;PHLDA3;FKBP4;ZFP106;CBFB;BAG5;ZFP598;EIF4G2;ZFP81;DIS3;EIF4E2;SMARCE1;KRR1;FBXL19;VAPA;ASXL2;TCERG1;SRRM2;D…
PPARG-19300518	15	272	0.0121852	0.00646649	0.00571872	0.018219	1.94401	-7.78631	GCC1;PBX3;D17WSU92E;SERTAD2;NR1H3;BAG4;UBE2I;CUEDC1;CEBPA;NFAT5;GNG2;CIZ1;MMAB;FOXJ2;TNIP1
E2F4-17652178	63	1002	0.0511779	0.0238214	0.0273565	5.17353e-08	0.488574	-8.19686	HEXIM2;UCK2;SASS6;LRRC1;PELI2;MBD1;RORB;MAP3K7;DMTF1;DLX1;MAZ;SP1;FOXM1;HMG20A;EIF5A;PPM1B;E2F3;EIF4B;CYB5B;MMAB;HHIP;TMPO;ARL15;XRCC2;WNK1;SUV39H1;OTUD6B;PRPF40B;RAP2A;PTMA;MNT;ARID2;PHF12;HOOK3;GSK3A;PRR3;LMNB1;MYC;MBNL1;RPL28;ASF1B;NOLC1;PRDM10;BRD2;CIT;NSD1;CDKN2D;WWOX;FOSB;RAB30;TNKS;TCERG1;FUBP1;PARP4;RHOH;DCP2;NUCKS1;PMAIP1;CBX5;YBX1;RBMS1;LEF1;DEK
MYCN-21190229	20	373	0.016247	0.00886765	0.0073793	0.00949527	1.80607	-8.41079	CHIC1;RASSF5;ATG12;DCUN1D2;NFATC3;CPEB4;NEFH;SGK3;DCP2;HDDC3;CACNB4;CPLX2;ESRRG;ARHGAP11A;WDR4;FOXM1;PPM1B;GAP43;DCX;CREB5
ELK1-19687146	67	917	0.0544273	0.0218006	0.0326267	6.62482e-11	0.371886	-8.71612	ALKBH8;RFX5;ATF7;SF1;MLLT11;SNX11;EFCAB2;GATAD2B;MAP3K7;DMTF1;ARHGAP11A;HMG20A;CXXC4;CYB5B;FOXJ2;TRIM39;SLC25A36;CD2BP2;EPB41;EAF1;RAB27B;MAP1LC3B;ENAH;PCNP;ARID2;GSK3A;PRR3;HP1BP3;RBM34;TBP;GOSR1;PDLIM5;MYC;BCL10;GMEB1;PHF23;PHF6;AFTPH;CDKN2C;NR1H2;NFIA;MSRB3;AHR;TPD52;TPM1;MITF;TOX;TNKS;ANKRD11;PHF21A;FAM103A1;WDR4;ZFP91;TRAF7;GTF2A1;KRR1;TNRC6B;MTUS1;ZRANB2;FUBP3;NUCKS1;ZMAT3;ZC3H13;YBX1;RBMS1…
EP300-21415370	61	1014	0.0495532	0.0241067	0.0254465	3.4817e-07	0.595186	-8.85075	MDC1;SHB;CDC42EP3;EGLN1;SPSB1;NAB1;EIF4ENIF1;SCMH1;FOXP1;LY6E;BCL2L11;SP4;FGFR1OP;TRIM67;PARD3B;ARL4C;SH3BP5;TRIM44;CERK;OTUD6B;ZHX3;CTTNBP2NL;AI597479;CRIP2;SERTAD2;OTUD4;ZFAND3;GRK5;FGF12;RBM24;PDLIM5;MBNL1;PRKCE;TSPYL5;SLAIN2;BCL10;FIGN;GRB10;PHLDA1;CACNB2;BAG5;PLEKHF2;LBH;ZFP777;ABLIM1;ASXL1;SRRM1;SRPK2;GNG12;PUM2;ZZZ3;TSC22D1;RHOU;CTNNA1;RANBP3;DLC1;COBLL1;SMAD7;RBMS3;USP12;WEE1
CUX1-19635798	116	3052	0.0942323	0.0725578	0.0216745	0.0031602	1.55597	-8.95792	GMFB;CAPNS1;NDST4;AKT1;PKNOX1;FNBP4;ATF7;SF1;BAZ2A;EPB41L2;EGLN1;EGLN2;SKI;LIMS1;PDCD7;MAP3K7;BMF;SP2;BCAS1;TRIM44;UBQLN2;EPB41;RAB27B;ITGBL1;GRB2;PCYT1B;PCYT1A;RAP2C;KIF9;PTMA;FGF12;LMNB1;TBP;OLIG2;EPN1;RNF6;GNG2;ATF7IP;SNTB2;MBNL2;CTBP1;PAFAH2;PHF3;BTG2;PHF6;GAS7;NR1H3;SYNJ2BP;RAB30;RAB37;FKBP8;PGR;FKBP5;WDR4;DNAJB2;ABLIM1;TCERG1;RPS6KA3;COG3;PPHLN1;CBX5;TSGA10;CASP2;RBMS3;DEK;CDK2AP1;RFX3;RFX5…
TP53-16413492	25	449	0.0203087	0.0106745	0.00963423	0.00258252	1.53541	-9.14948	BACH1;MYC;PRKCE;RFX3;VTI1A;AEBP2;CDC42EP3;GAS7;FGD3;CHN2;NAB1;UBP1;MSI2;FGF2;PHLDA3;ANKRD11;ANKRD10;MDM4;ITGAM;NHS;TSGA10;ZCCHC2;LASP1;BCL7B;NAV3
RCOR1-19997604	99	2378	0.0804224	0.0565342	0.0238882	0.000435913	1.19493	-9.24643	AKT1;PKNOX2;FNBP4;ISL1;B230219D22RIK;PBX1;NMT2;TRP53BP1;EGLN2;NAB1;DMTF1;DLX2;SP3;PTEN;0610040J01RIK;ZNRF2;UBQLN4;SMARCC2;OTUD6B;ZHX1;YAP1;AGGF1;HDGF;TACC1;TBC1D20;GPRIN1;TBC1D12;UBE2F;FGF14;HOOK1;HP1BP3;LMNB1;TBP;ZMYND11;GNG4;PRKCE;CTBP1;PHF6;ZFP365;TAF9B;HIPK3;UBP1;DYRK1A;PLEKHF2;VAPA;TCERG1;ARRDC4;DCUN1D1;RALGPS2;MTSS1;PURB;CBX5;TRPS1;RBMS2;RFX3;CGGBP1;SASS6;LRRC1;CDC42EP3;PELI1;PELI2;ZFP207;S…
EST1-17652178	48	1001	0.0389927	0.0237976	0.0151951	0.000975533	1.3397	-9.2875	DAXX;SF1;HEXIM2;ARF6;ZFP260;MBD1;MAP3K7;MAX;SHC1;SP1;HMG20A;PPP1R12C;PRCC;CYB5B;ARL15;THAP2;THAP1;TTBK2;EAF1;WNK1;PPP1R10;THTPA;PCNP;COX10;PHF12;GSK3A;PRR3;GOSR2;GABPB2;ATG12;NOLC1;NFATC3;PAFAH2;CPEB4;PHF23;NR1H2;RAB30;WBP2;VAPA;ASXL2;DCP2;ZMAT2;ACBD5;CBX5;DLG4;AKT1S1;TOB2;CAPN10
STAT3-1855785	47	572	0.0381803	0.0135986	0.0245817	1.61711e-09	0.460613	-9.32402	MDC1;CAPNS1;MYC;PKNOX1;ASF1B;NOLC1;VTI1A;UCK2;EZH2;MTMR12;BBC3;MESDC1;CIT;ARF6;SPSB1;TPD52;CISH;ZFP219;FOXP4;NF2;PHACTR4;EIF5A;NFAT5;ASXL1;NECAP2;KLF9;SLC25A36;SOX2;GOLGA3;ARL15;THAP1;EIF1A;ZFP629;RBAK;PTMA;STX16;PAK6;DLC1;LPP;BCL9L;ARHGAP27;SMAD7;ARHGEF12;RBM18;GFOD2;SPRY2;SNTB2
EOMES-21245162	73	932	0.0593014	0.0221572	0.0371441	4.2443e-13	0.329326	-9.38184	EPSTI1;PKNOX1;HEXIM2;SASS6;EZH2;SNX11;JPH2;PLAGL1;LIMS1;YPEL2;MSI1;SCMH1;MAP3K9;PFKFB2;CCDC85A;UBQLN4;CYB5B;FOXJ2;HNRNPAB;SMAP2;ZBTB4;RAB11FIP3;RAB11FIP4;DHRS11;AKAP12;PPFIA4;COX10;PICALM;LASP1;RBM34;PDLIM5;SNTB2;ADARB1;MBNL2;FNDC3A;RAB3IP;BTG2;PHF23;TESC;CHN2;NR1H3;SYNJ2BP;ABI2;MSRB3;ANKRD13A;TPM1;CACNB3;FKBP4;ANKRD34A;EIF4G2;RNF10;LBH;EFHD2;NUMB;WBP4;ABLIM1;SMARCE1;DIXDC1;RPS6KA3;CARHSP1;MAP2;S…
NRF2-20460467	79	1055	0.0641755	0.0250814	0.039094	3.89931e-13	0.329374	-9.41113	B230219D22RIK;PRKAR2B;PBX1;MRVI1;MTMR12;BC048403;CDC42EP3;PPARD;SAMD5;SYNPO2;PELI2;SNX22;SLMAP;RORB;MAP3K9;FOXP1;ACAP2;MAF;DLX2;SOCS5;SP3;MDM2;PIK3CA;ZFP652;SH3BP5;E2F6;PRRX1;L3MBTL3;FBF1;RASSF8;ICK;SCML4;ENAH;RXRA;PAK6;TTC9;OSCAR;PPIF;GRK5;1810013L24RIK;GOLPH3;SOX13;HMOX1;PHF3;FAM102A;ZFP365;ZFP148;FGD3;CHN2;NSD1;ZYX;RNF141;AHR;GRB10;PHLDA1;TPM1;MAFG;LBH;MARCKS;KLF9;TNRC6B;ARRDC4;HECA;HRASLS;TBC…
NFE2L2-20460467	79	1055	0.0641755	0.0250814	0.039094	3.89931e-13	0.329374	-9.41113	B230219D22RIK;PRKAR2B;PBX1;MRVI1;MTMR12;BC048403;CDC42EP3;PPARD;SAMD5;SYNPO2;PELI2;SNX22;SLMAP;RORB;MAP3K9;FOXP1;ACAP2;MAF;DLX2;SOCS5;SP3;MDM2;PIK3CA;ZFP652;SH3BP5;E2F6;PRRX1;L3MBTL3;FBF1;RASSF8;ICK;SCML4;ENAH;RXRA;PAK6;TTC9;OSCAR;PPIF;GRK5;1810013L24RIK;GOLPH3;SOX13;HMOX1;PHF3;FAM102A;ZFP365;ZFP148;FGD3;CHN2;NSD1;ZYX;RNF141;AHR;GRB10;PHLDA1;TPM1;MAFG;LBH;MARCKS;KLF9;TNRC6B;ARRDC4;HECA;HRASLS;TBC…
ESR1-21235772	14	228	0.0113729	0.00542044	0.00595243	0.00990723	2.09386	-9.66211	SOX3;PKNOX1;UNC13D;EPS15L1;SGK3;MAPT;NFIC;TACC1;FKBP4;ZFP106;BMF;LHX6;CHD9;EFHD1
NANOG-18700969	21	344	0.0170593	0.00817821	0.00888109	0.00199401	1.57506	-9.79313	SOX12;WWTR1;PHC1;PARVB;PPP1R10;AKAP12;SYNCRIP;JARID2;RALGPS2;PCYT1B;PAX6;PPHLN1;MTSS1;ENAH;SALL1;TPD52;STK35;PMAIP1;DAB1;ZFP422;CDK2AP2
POU5F1-18700969	34	567	0.0276198	0.0134798	0.01414	0.000139099	1.11455	-9.89757	CAPNS1;PHC1;PHF6;PAX6;PLAGL1;LIMS1;PHLDA1;SNRPN;FKBP4;LY6E;ESRRB;DAB1;DUSP10;SOX2;EBF1;TLN1;WWTR1;RCOR1;AKAP12;PCYT1B;PPHLN1;MTSS1;YAP1;SERTAD2;LPP;PMAIP1;POU2F1;MKRN1;SPRED1;USP46;PTGIS;ATF7IP;PPP2R2C;SPRY2
PDX1-19855005	50	669	0.0406174	0.0159047	0.0247127	8.97864e-09	0.550044	-10.1915	GABPB2;MED9;RFX1;ATF7;ASF1B;NOLC1;ZFP184;SFXN3;PHF23;MECP2;PAX6;ZFP148;1600014C10RIK;LIMS1;ZFP687;ZFP207;MYLIP;CISH;RAB30;LY6E;SHC1;SP2;SGIP1;WBP2;PRCC;ZFP668;AP3M1;ZFP319;SLC25A36;DCUN1D3;RASSF7;PPP1R10;SH3KBP1;AKAP12;BC005624;MNT;SHOC2;NFYA;NUCKS1;CBX5;ARHGAP27;HOOK1;A330008L17RIK;TBP;KLF16;AKT1S1;GOSR2;GNG4;CAPN10;CDK2AP1
SMAD4-19686287	38	405	0.0308692	0.00962841	0.0212408	2.21786e-09	0.517348	-10.309	MDC1;MBNL1;MBNL2;TSPYL1;NFATC3;EIF5;BTG2;LITAF;CDC42EP3;RYBP;MAP3K7;PHLDA1;TPD52;RASAL2;LIN7C;ATXN1;MAFK;PTEN;ZFP91;DNAJB2;ABLIM1;CERK;FAM53B;MAP7;RAB11FIP2;GNG12;FUBP3;ITGBL1;CALM3;ENAH;RAP2A;NFX1;ZC3H13;SMAD7;PICALM;CHD9;RBMS1;TNIP1
THAP11-20581084	61	864	0.0495532	0.0205406	0.0290126	1.62738e-09	0.510769	-10.3361	ITSN1;ALKBH8;SAMD12;TBPL1;HEXIM2;SH3BGRL2;PELI1;TCOF1;ZFP219;MAX;5730455P16RIK;KSR1;SLC25A19;PPP1R12C;PRCC;ZFP668;UBQLN4;NECAP2;THAP2;FBF1;TTBK2;WNK1;STX16;PCNP;PLEKHA1;OTUD4;PHF12;CLK3;GSK3A;DDX46;HP1BP3;LMNB2;GOSR1;SCRIB;SETD1A;THAP11;PHF23;JARID2;ZIM1;ZFP35;MITF;RAB30;ZFP46;PISD-PS2;ZFP109;MAP3K10;RNF10;PHACTR4;DIS3;ZFP91;LCORL;WBP2;ABLIM2;RBBP9;KRR1;ASXL1;PANK3;TLN1;INPP5B;INPP5F;2310036O22RIK
BMI1-19503595	52	661	0.0422421	0.0157145	0.0265276	9.00316e-10	0.496671	-10.3448	GMFB;CAPNS1;NOLC1;LAD1;GRAMD2;UCP2;SPSB1;TAOK3;SALL1;BNIP3L;TPM4;RAB30;ZFP106;UBE2CBP;INO80D;AMDHD2;ESRRB;FOXN2;DAB1;ITGAM;ZFP777;CEBPA;JAKMIP1;CXXC4;ATXN1L;KLF9;RUSC1;FAM53C;CHAC1;COG3;INPP5B;PRRC1;UBAC1;AKAP12;CHMP1A;TMED8;ZHX1;NUCKS1;POU3F2;GPRIN1;PXK;PMAIP1;ARHGAP27;FGF13;ZIC1;DYNLT3;GFOD2;MYH6;SNCB;POLM;NAP1L5;POLE3
CDX2-20551321	39	504	0.0316816	0.011982	0.0196995	1.66481e-07	0.662969	-10.3479	MYC;MED9;PRDM16;NFATC2;SNX11;TRIM2;EFCAB2;BRD2;HS1BP3;WWOX;NAB1;MSI2;FOXP1;RAB30;BCL2L11;SP2;ZFP64;SNAP23;BCAS1;SLC25A16;CEBPA;CXXC5;SLC25A36;TCERG1;THAP1;PIK3R1;CITED2;GLTSCR1;RHOU;YAP1;DLC1;ARID2;ZFP36L2;BCL9L;RBM34;ARHGEF12;USP12;ARID3A;SPRY2
GABP-17652178	49	1001	0.039805	0.0237976	0.0160074	0.000570576	1.39654	-10.4306	FRS2;VTI1A;SASS6;MBD1;FBXO28;ZBTB26;HDDC3;MAP3K7;SHC1;LIN7C;HMG20A;E2F5;NECAP2;THAP2;THAP1;CD2BP2;PCBP1;SURF6;EAF1;PPP1R10;PCYT1A;RAP2C;KIF9;STX16;COX10;GSK3A;DDX46;PRR3;TBP;GOSR2;GOSR1;ACIN1;GABPB2;RPL28;PAFAH2;PHF23;MTF1;WDR25;SF3B2;NR1H2;MTPN;COG3;CAGE1;NKAP;STAM2;ACBD5;YBX1;AKT1S1;CHMP5
POU5F1-16518401	82	1550	0.0666125	0.0368495	0.029763	5.72563e-07	0.735354	-10.5694	PBX3;SNX11;TRP53BP1;MBD1;BC052040;E2F5;UBQLN4;EPC1;FBXO9;6430548M08RIK;AKAP12;HDGF;UBE2H;1810013L24RIK;MKRN1;LMNB1;ZIC3;BNIP3;PHC1;GMEB1;JARID2;CIT;AEBP2;RARA;SALL1;FKBP8;PGR;FKBP4;TOX;BCL9;DAB1;PHACTR4;ASXL1;RALGPS2;PPHLN1;PPP2CB;LPP;ZMAT4;RBMS3;CAPN10;VTI1A;UCK2;JPH2;GATAD2B;ZFP219;FOXN2;VEZF1;USP27X;PRCC;QK;L3MBTL3;PIK3R1;ENAH;SERTAD2;DOK5;PHF10;PHF12;PDLIM5;SOX11;BRD2;WWOX;RYBP;AHR;MITF;ZFP10…
VDR-20736230	15	230	0.0121852	0.00546799	0.00671723	0.00469097	1.97469	-10.5885	MAML1;IKZF1;EPSTI1;MBNL2;FRS2;MED13;PLEKHA1;BNIP3L;VASH2;CHD7;DUSP10;KLF13;PIK3CA;VHL;BNIP3
ESR1-17901129	26	444	0.021121	0.0105556	0.0105654	0.00110824	1.56449	-10.6464	GMFB;CPEB4;LITAF;NFIC;LIMS2;SH3GLB1;CISH;FKBP4;SH3BP5;E2F3;CERK;FRAT1;LGALS9;ARRDC4;MTUS1;THAP1;FBF1;CITED2;ZHX3;CRIP2;PROZ;PICALM;ARHGEF12;ARHGEF19;RABEP1;WEE1
TCF4-18268006	38	470	0.0308692	0.0111737	0.0196955	8.52538e-08	0.658874	-10.7249	PRKCE;SOX11;FOSL2;TFCP2L1;RCSD1;CDC42EP3;EGLN1;SH3GLB1;PFKFB2;DLX1;SOCS5;ESRRG;BCL9;DAB1;DUSP10;LBH;EFHD1;CTDSPL;PPM1B;EIF4E2;FOXJ3;RPS6KA3;YOD1;MAP2;PCBP1;MAP4;LIMD1;ENAH;KIF9;TRAK2;HDGF;ZFP36L2;HOOK1;THRB;OXSR1;FAM84A;COL6A3;FAM63A
SOX2-16153702	72	1278	0.058489	0.030383	0.028106	3.29338e-07	0.727604	-10.8604	MDC1;FRS2;RFX1;ISL1;NEBL;FLI1;RORB;FOXP1;DLX1;DLX5;SP2;SP4;ARHGAP11A;HMG20A;RAD23A;PPM1B;PRCC;E2F3;UBQLN4;FOXJ2;NUDT4;PCBP1;WWTR1;PPP1R10;PCYT1B;GSK3B;GSK3A;PLEK;LASP1;ZIC3;ZIC1;TBP;POLE3;ACIN1;HMOX1;GLI3;JARID2;PAX6;CHN2;NFIA;UBP1;FGF2;SALL1;SNRPN;RAB30;BCL9;EIF4G2;ABLIM1;RBBP9;FBXL19;RAB15;INSM1;SOX2;SOX5;RRAGD;RBAK;ZCCHC14;TSC22D1;MTSS1;NOL4;NFYA;LMO3;OTX1;CBX5;POU2F1;CBX2;ZCCHC3;CASP9;SPRED1;…
STAT6-20620947	31	508	0.0251828	0.0120771	0.0131057	0.000201624	1.30401	-11.0959	RFX3;NFATC3;FLI1;MED15;FAM102B;CDKN2C;SKI;RORA;MSI2;CISH;FOXP1;ATXN1;PARD3B;EVL;ZNRF1;TNRC6B;IKZF1;RASSF5;HABP4;RAB11FIP4;RAB27B;SH3KBP1;RAB22A;TRAK2;PHF12;HMGA1;CHD7;SIX3;RBMS1;LEF1;ACIN1
CHD1-19587682	61	843	0.0495532	0.0200414	0.0295118	6.7732e-10	0.525974	-11.1048	ATF2;LSM12;CAPNS1;RFX1;SNX11;EIF4ENIF1;BNIP3L;ZFP219;DMTF1;ZKSCAN5;ARHGAP11A;SNAP23;HMG20A;ZNRF2;E2F3;FBXO9;CD2BP2;EIF1A;ICK;PPP1R10;OTUD7B;RAP2A;PHF12;HOOK1;BCL7B;GOSR2;ACIN1;GABPB2;WIPF2;MBNL2;PRR14;PHC1;NFATC3;ZFP143;ZFP35;ANKRD13A;ZFP106;TNKS;CNOT6;ZFP64;NF2;EIF4G2;WDR4;OPA3;ZFP91;TRAF7;GTF2A1;LUZP1;ASXL2;TNRC6B;SOX2;ZRANB2;RALGPS2;TSC22D1;GPBP1L1;ZC3H13;CBX7;ACBD5;CBX5;POU2F1;RBMX
ZNF263-19887448	5	71	0.00406174	0.00168794	0.00237379	0.0653881	4.10255	-11.1894	CACNB3;CGGBP1;PURB;GPBP1L1;MKRN1
SMAD1-18555785	45	610	0.0365556	0.0145021	0.0220536	6.98592e-08	0.685736	-11.2987	BACH1;TSPYL1;UNC13D;SLAIN2;PHC1;REL;MTMR12;JARID2;MESDC1;AEBP2;CDC42EP3;RNF166;RUNX1T1;TPD52;ZFP219;FKBP4;PHF21A;ESRRB;MAFG;LBH;EFHD1;SLC25A16;ZFP771;KLF9;INSM1;ZFP553;NUDT4;SOX2;QK;ARL15;RRAGD;CD2BP2;DCUN1D3;FUBP3;THTPA;SYNCRIP;PTMA;DLC1;NUCKS1;SMAD7;MKRN1;ZIC3;KLF13;TCTE1;LEF1
POU5F1-16153702	37	622	0.0300569	0.0147873	0.0152695	8.42649e-05	1.20522	-11.3068	ISL1;VTI1A;NEBL;FLI1;GLI3;JARID2;PAX6;NFIA;CCDC6;RORB;FGF2;SALL1;SNRPN;DLX1;DLX2;DLX5;PHF21A;BAG5;MCC;HMG20A;INSM1;SOX2;TBC1D22B;SOX5;TSC22D1;POU3F2;KLHL14;OTX1;MKRN1;SPRED1;ZIC3;TRPS1;ZIC1;GAP43;LEF1;MEIS2;WEE1
KDM6A-18722178	28	479	0.0227457	0.0113877	0.0113581	0.000749479	1.58646	-11.4163	ASF1B;SNX11;MTF1;ANKRD13C;FBXO28;MAP3K7;BAG4;SLC7A6OS;ARHGAP11A;WBP4;U2AF2;UBQLN1;CYB5B;KRR1;NECAP1;GOLGA4;CSTF2;ZRANB2;EAF1;BSDC1;PPHLN1;PCNP;NFYA;STAM2;DDX46;TBP;GOSR2;GOSR1
NANOG-16153702	90	1686	0.0731113	0.0400827	0.0330286	1.09319e-07	0.717059	-11.4937	FRS2;ISL1;NEBL;PBX1;EPS15L1;CCDC6;DLX1;DLX5;SP2;BCAS1;ZNRF2;E2F3;UBQLN4;EIF4B;TRIM39;MAP1LC3B;PCYT1B;KIF9;YAP1;POU3F2;RPP25;CNN3;MKRN1;ZIC3;ZIC1;TBP;JARID2;RUNX1T1;NFIA;UBP1;FGF2;SALL1;SNRPN;RAB30;BCL9;DNAJC8;ASXL1;RAB15;VAPB;TCERG1;CITED2;LMO3;CBX5;POU2F1;ZCCHC3;THRB;CASP9;SPRED1;SIX3;DCX;LEF1;WEE1;MEF2A;RFX1;FLI1;RORB;EIF4ENIF1;MCC;MDM2;ARHGAP11A;HMG20A;RAD23A;FOXJ2;THAP1;PCBP1;WWTR1;GRIPAP1;KH…
CDX2-19796622	23	334	0.018684	0.00794047	0.0107435	0.000268171	1.40676	-11.569	WIPF1;RASSF4;SOX6;TRPM6;SIAH2;PBX3;RAB22A;SCML4;ZFP385B;PELI2;CAMKK2;ZFAND5;FGF2;ATXN1;COBLL1;UBE2H;ZBTB10;ESRRG;SOBP;PSD3;NAV3;CTDSP2;RMND5A
TP53-18474530	64	827	0.0519903	0.019661	0.0323293	1.9487e-11	0.477681	-11.7802	NDST4;EPSTI1;EID1;BBC3;CDC42EP3;RORA;FOXP1;ATXN3;MDM2;MDM4;PARD3B;PARD6B;DBNDD1;CCNK;RAB22A;SERTAD2;ZFAND5;CHD9;HP1BP3;PLEK;CYTH1;MYC;PRKCE;FOSL2;MEX3B;CPEB2;CPEB4;BTG2;GLI3;FIGN;CHN2;RYBP;FGF2;ANKRD10;DAB1;ZFP64;NF2;PSD3;TLK1;SGIP1;DNAJB2;NHS;KLF3;SOX1;HRASLS;DCUN1D3;INPP5B;CITED2;DCP2;NUCKS1;NANOS1;ZMAT3;COBLL1;ZMAT4;ACBD5;ARHGAP30;MAP6D1;ZCCHC2;THRB;FAM84A;COL6A3;RBMS1;FAM84B;RGS16
CRX-20693478	53	668	0.0430544	0.0158809	0.0271735	4.69839e-10	0.55243	-11.8654	BACH1;ATG12;PRKAR2A;HMOX1;PBX1;MEX3B;CEP57;PHF23;MECP2;NEFH;BC048403;PELI1;CHN2;SPSB1;YPEL2;MSI2;2810403A07RIK;MCC;NF2;ANKRD33B;PSD2;OPA3;EIF5A;ARNT;PRCC;JAKMIP1;TCERG1;FAM53C;DCUN1D3;ZBTB4;PEA15A;FAM78B;CALM1;OTUD7B;OTUD6B;KIF9;PTMA;DCP2;SERTAD4;SERTAD2;CTNNA1;OTUD5;GRIP1;CCDC157;ARHGAP26;DLG4;MXD1;PLEK;YBX2;LMNB1;ZIC3;CUEDC1;1700003E16RIK
TP63-19390658	26	179	0.021121	0.00425552	0.0168655	2.28566e-10	0.539264	-11.9712	RORA;GRIP1;PKNOX2;DLX1;OTX1;FOXF2;SMAD7;SP1;ZFP62;RNPS1;CHD9;CITED2;FOXM1;PHF6;ZIC3;TRPS1;JARID2;PPARD;GTF2A1;LEF1;SERTAD2;PLAGL1;E2F5;NR1H3;MEIS2;INSM1
RCOR2-21632747	34	401	0.0276198	0.00953332	0.0180865	1.44593e-07	0.766951	-12.079	JARID2;NSD1;CDKN2C;SYNJ2BP;FBXO28;SALL1;TPD52;HIC1;PISD-PS2;PHF21B;BCL9;CELF4;PPM1B;NECAP1;TNRC6B;SRRM3;RRAGD;PCBP1;RAB11FIP3;PRG4;MON1A;CITED2;OTUD7B;SH3RF1;NCS1;ICA1L;BEGAIN;SERTAD4;POU3F1;ARHGAP27;CHD9;SNCB;CYTH1;SGTA
RARG-19884340	27	390	0.0219334	0.00927181	0.0126616	7.5919e-05	1.27729	-12.1162	CAPNS1;MBNL1;MED9;RFX1;EFCAB2;FIGN;CDKN2D;AOC2;FAM107B;RAB30;SHC1;BCL2L11;ZNRF2;ZFP319;DBNDD1;WWTR1;FUBP1;ITGBL1;CHMP1A;YAP1;ALS2CL;CSDC2;OTUD5;H1FX;HMGA1;ARHGEF19;SNTB2
SMAD-19615063	9	124	0.00731113	0.00294796	0.00436317	0.0139964	2.85342	-12.1811	FRAT1;EPSTI1;ATXN1;NAV3;NFAT5;RUNX1T1;HIPK3;LRRC20;KLF9
HIF1A-21447827	22	321	0.0178716	0.00763141	0.0102402	0.000382983	1.55086	-12.2014	MAML1;SIAH2;RASSF7;CITED2;OTUD7B;AKAP12;MAP1LC3B;VGLL4;SERTAD2;ZSWIM4;GRB10;TPD52;MAF;RAI14;MAX;POU2F1;CLK3;MAFK;OXSR1;EVL;SOS1;PARD6B
SUZ12-18555785	73	1058	0.0593014	0.0251527	0.0341486	1.03967e-10	0.539613	-12.4041	PKNOX2;HDGFRP3;EID1;AR;PRKAR2A;FLI1;RCSD1;JPH4;JPH3;PELI2;PLAGL1;NAB1;RORB;FOXP2;MAF;DLX1;DLX2;ZFP467;DLX5;LIN7A;ATXN1;NKX3-1;ARL4C;CXXC4;PRRX1;IKZF1;CALN1;FOXG1;FOXF2;STX17;SERTAD4;FGF12;LYL1;ZIC1;OLIG2;RBM24;GNG4;ADARB1;FOSL2;CPEB2;TESC;NFIA;GRB10;TPM1;VASH2;HIC1;CACNB2;CACNB4;MAFB;LBH;EFHD1;ADRA2C;NHS;SOX3;SOX1;SOX9;EBF1;TSHZ3;EIF5A2;SIAH2;GNG12;SNAP91;TMCC3;CITED4;FEZF2;APBA1;KCTD8;DTX4;NLRP6…
STAT3-19079543	61	948	0.0495532	0.0225376	0.0270156	3.93018e-08	0.74062	-12.629	PKNOX2;CYB5R3;LAD1;JPH2;SPSB1;PDCD7;RORA;EIF4ENIF1;ZFP219;DLX5;SHC1;BCAS1;ARL4C;PPM1B;SH2B3;CABLES2;NECAP2;IKZF1;EIF1A;FBF1;ZFP503;MKX;6430573F11RIK;SYNCRIP;CSDC2;ZFAND3;POU3F2;LSM14B;FGF12;ZIC1;OLIG2;TCTE1;GOLPH3;SOX21;PRKCE;PRR14;FOSL2;ZFP365;BRD2;PAX6;RNF166;GAS7;ZFP146;CDKN2C;RYBP;COL27A1;TPM4;FKBP8;MAFB;ABLIM1;ASXL1;RUSC1;EBF1;SS18L1;FEZF2;BC005624;RALBP1;LPP;SIX3;LEF1;CDK2AP2
POU5F1-18555785	40	555	0.0324939	0.0131945	0.0192994	6.37919e-07	0.885421	-12.6306	PKNOX1;RFX1;VTI1A;EIF5;4931428F04RIK;NSD1;ZFP207;STK35;ZFP64;WDR4;RAD23B;NFAT5;CXXC4;FBXL19;HHIP;GCC1;TLN1;ATP5D;SURF6;FUBP3;CALM1;CITED2;PPP1R10;OTUD7B;PPHLN1;MTSS1;TOX4;ZFP704;STX16;PPP2CB;ARHGDIA;KHSRP;PXK;MKRN1;LSM14A;CHD9;LMNB1;ATF7IP;POLM;SNTB2
ELF1-17652178	10	133	0.00812348	0.00316192	0.00496155	0.00794534	2.61883	-12.6625	CCNK;CD2BP2;SF1;ZMAT2;CEP57;GSK3A;PARP4;RBMS1;TAOK3;NFIA
ERG-21242973	23	321	0.018684	0.00763141	0.0110526	0.000157158	1.44985	-12.6981	GCC1;SOX21;SOX3;RUSC1;SOX11;FAM43A;RAB11FIP4;TOX2;CDC42EP3;AMIGO3;PURB;RXRA;HSF1;UBP1;FGF2;SALL1;ARHGDIA;SBNO2;SYT6;MAFG;PTGIS;OLIG2;FAM84A
MYC-18940864	41	746	0.0333063	0.0177353	0.015571	0.000179928	1.48903	-12.8399	GPATCH8;MYC;RPL28;NKX2-1;UCK2;CHN2;CDKN2C;RYBP;RAB37;UAP1;PLEKHF2;PTEN;TRAF7;LCORL;MTPN;MTHFSD;MID1IP1;TCERG1;CERK;SOX9;MIER3;SRPK2;FOXF2;CALM1;AKR1A1;KIF9;MTX3;RAI14;UBE2F;CBX5;UBE2I;CBX2;SMAD7;H1F0;ZCCHC2;LMNB1;SIX3;GAP43;GOSR1;CYGB;GNG2
EGR1-19032775	22	276	0.0178716	0.00656159	0.0113101	5.17645e-05	1.3042	-12.8709	SOX11;MAP2;MAP7;MAP4;FOSL2;CITED4;BBC3;PCYT1A;VAMP2;PRKX;PAK6;SAMD1;NFIC;RGS3;KHSRP;MAP3K7;MAX;BMF;DYRK2;PSD3;DNMT3A;TRIM39
SCL-21571218	125	1784	0.101543	0.0424126	0.0591309	4.66747e-18	0.327865	-13.0837	GMFB;ZC3H12C;EPSTI1;SFXN3;MED15;YPEL2;MSI2;STX7;SNAP23;BCAS1;ZNRF1;CERK;IKZF1;TBC1D22B;SMARCC2;ARL15;EPB41;RAB27B;GRB2;DHRS11;THTPA;KIF9;RAP2A;CNKSR3;PTMA;SH3BGRL;GRIP1;MAP7D2;RPP25;SYT6;PLEK;ETV4;WIPF2;MBNL1;MBNL2;SCRIB;PRDM16;NFATC2;JARID2;SIKE1;RUNX1T1;TPM4;AKIRIN2;CTDSPL;PARVB;CITED4;ZCCHC14;ZCCHC24;PARP4;CBFA2T3;MTSS1;PXK;ZMAT3;ZMAT4;PMAIP1;KLHDC1;THRB;COL6A3;PPP2R2C;SAMD12;AGAP3;PRKAR2B;FLI…
SRF-21415370	88	1634	0.0714866	0.0388465	0.0326401	1.05731e-07	0.828518	-13.308	ATF2;GMFB;FNBP4;ATF7;BAZ2A;SNX11;SAMD5;DMTF1;AMDHD2;DBNDD2;TRIM39;LGALS9;CCDC94;FBXO9;ARL15;CCDC86;NUMBL;GRB2;MON1A;THTPA;OTUD6B;CTTNBP2NL;LDB3;ETV4;1700003E16RIK;GNG2;PRKCE;ARMC7;PAFAH2;RRP1B;DEF8;TPMT;UBP1;RAB30;TFDP1;LCORL;ABLIM1;RAB23;KRR1;CITED2;EME2;CBX5;TSGA10;MDC1;EML1;RFX5;PSMG3;EZH2;UCP2;UBAP1;ZFP219;PFKFB2;UBFD1;GCC1;ATP5D;WWTR1;EAF1;RSRC1;STX17;AI597479;CHD9;ARHGEF19;CREB1;ACIN1;GABPB…
HNF4A-19761587	65	1126	0.0528026	0.0267694	0.0260332	5.63055e-07	0.943496	-13.5768	AKT1;VTI1A;HEXIM2;LAD1;BBC3;LRRC1;JPH2;EFCAB2;SH3BGRL2;ARF6;FOXP4;DLX2;ATXN1;BMF;SOCS5;PTEN;HMG20A;ARNT;MID1IP1;SMARCC2;RBM12;N4BP1;SUV39H1;PCYT1B;STX16;CNN3;BCL9L;PRR3;LMNB1;TBP;RBM18;GOSR2;RNF6;GNG4;PDLIM5;GOLPH3;TEF;ASF1B;PRDM10;NFATC3;TRIM2;BRD2;FGD3;NR1H3;FKBP8;PHACTR4;WBP4;ABLIM1;ASXL1;TCERG1;GOLGA3;GOLGA4;SOX5;EIF5A2;MAP7;SIAH2;CITED2;NUCKS1;LMO3;ZFP36L2;SPRED1;USP46;KLF11;CHMP5;SPRY2
STAT1-20625510	38	656	0.0308692	0.0155957	0.0152736	0.000113792	1.5218	-13.8197	MYC;SOX12;UNC13D;EML3;CDK19;PAFAH2;FOSL2;MTMR12;NEFH;BRD2;CDC42EP3;EGLN2;MAP3K7;TICAM1;SBNO2;SOCS5;ZFP64;SNAP23;CELF5;SLC25A16;TRAF7;FBXL19;SRRM3;SMARCC2;CD2BP2;NECAB2;DCUN1D3;PARVB;PPP1R10;MRPS12;ZHX1;PCP4L1;FKBP1A;CBX7;LASP1;BCL7B;KLF16;GAP43
IRF1-19129219	16	196	0.0129976	0.00465968	0.00833789	0.000407568	1.79663	-14.0233	NUDT4;RASSF5;CHAC1;RNPS1;AKAP12;PLAGL1;YPEL2;PICALM;CHD9;ZIC3;SIX3;ARNT;RFFL;GOLPH3;PTPN4;RBMX
EED-16625203	51	830	0.0414297	0.0197323	0.0216974	1.78779e-06	1.07487	-14.2255	AR;NEBL;FLI1;NEFH;FOXP2;DLX1;DLX2;ZFP467;BCL2L11;TMEM28;SOCS5;CXXC4;USH1G;CALN1;ZFP503;UBE2J1;FOXF2;POU3F2;SYT6;A330008L17RIK;ZIC1;OLIG2;CREB1;SOX21;MYC;PAX6;CDKN2C;NFIC;COL27A1;TPM1;HIC1;TOX;MAFB;LHX6;EFHD1;CTDSPL;CEBPA;INSM1;SOX3;SOX9;EBF1;SNAP91;CITED1;NOL4;OTX1;NETO1;SIX3;PTGIS;AKT1S1;LEF1;SNCB
ESR2-21235772	33	424	0.0268075	0.0100801	0.0167274	1.28879e-06	1.06912	-14.4992	MYC;PKNOX1;MBNL2;SOX13;JPH3;EPS15L1;NFIC;RIMS3;GRB10;MITF;RAB37;FKBP4;ATXN1;BMF;PLEKHF2;OPA3;EFHD1;CEBPA;WBP4;NHS;MID1IP1;MARCKS;RAB15;KLF9;SOX3;SOX9;RALGDS;SGK3;PALM;BCL9L;CHD9;TNIP1;PPP2R2C
E2F1-17053090	108	1726	0.0877335	0.0410337	0.0466999	9.75313e-13	0.533094	-14.7433	ZC3H12C;AKT1;PKNOX2;FRS2;BAZ2A;EPB41L3;HEXIM2;SNX12;MECP2;SHF;NEFH;CASC3;MSI2;SP1;MLLT1;EIF4B;MID1IP1;NECAP1;NUDT4;FBF1;ITGBL1;PCYT1B;RAP2C;RAP2A;OTUD5;CRTC3;FGF14;NAV3;RNF6;GNG2;ATF7IP;PRDM15;PRDM10;PHC1;PHF6;GAS7;HIPK3;SNRPN;TPM1;RAB30;TFDP1;TUB;TNRC6C;VAPA;SRRM2;RNPS1;CITED1;ZCCHC14;TMED8;FAM81A;RALBP1;LMO3;CBX5;ZCCHC2;SPRED1;DCX;MYH6;RBMX;SAMD14;CYB5R3;JPH3;PELI2;RORA;EIF4ENIF1;ATXN3;ARHGAP11…
ETS2-20176728	24	215	0.0194963	0.00511138	0.014385	1.09723e-07	0.922699	-14.7865	PRDM16;SIAH2;CITED1;CITED2;ZCCHC14;RAP2A;CDC42EP3;PTMA;ZFP704;MNT;WWOX;UBAP1;CRTC3;EIF4ENIF1;PFKFB2;DTX3;BCL9;RBM26;SPRED2;SOS1;CHMP5;MTPN;AP3M1;FOXJ2
NR4A2-19515692	20	207	0.016247	0.00492119	0.0113258	9.03395e-06	1.29343	-15.0225	MTUS1;FBF1;PRKAR2A;ARPP21;PPP1R10;BRD2;TSC22D1;ZFP260;ZFP146;RUNX1T1;GRB10;MAGI2;PFKFB2;AMDHD2;CBX7;FGF12;CXXC4;PDLIM5;UBQLN2;MARCKS
ESR1-20079471	23	216	0.018684	0.00513515	0.0135488	4.28734e-07	1.02887	-15.0857	CALM1;RALGPS2;PCYT1A;RHOH;CBFA2T3;MAPT;CCDC6;LIMS1;MRFAP1;FKBP4;MAX;SOCS7;MDM2;MAP6D1;BCAS1;VPS37C;SLC25A19;CUEDC1;FAM84B;PARD6B;E2F3;SMARCE1;SLC25A36
SALL1-21062744	9	105	0.00731113	0.00249626	0.00481487	0.00534139	2.91432	-15.2485	FGF2;SOX5;SMURF2;ZFP62;ZFP64;PICALM;RBM26;AFTPH;CHML
MYC-19915707	147	2979	0.119415	0.0708223	0.0485928	1.28775e-09	0.753494	-15.4243	ISL1;LARP1;MRVI1;SNX11;SHB;BC048403;TAOK1;CASC3;MSI2;MAP3K7;SLC9A3R2;SLC9A3R1;BCAS1;EIF5A;0610040J01RIK;ARL4C;ZNRF2;TRIM44;NUDT3;CCDC91;EPC1;LGALS9;FBF1;5730409E04RIK;RAB27B;ZHX3;AI837181;PCNP;TACC1;POU3F2;TBC1D20;TBC1D12;DYRK2;CUEDC1;GNG8;CTBP1;BCL10;PRDM10;PHC2;NFATC3;CEP57;GAS7;FGD3;NR1H2;SALL1;ANKRD13A;COL27A1;HIC1;ZFP358;LHX6;4931414P19RIK;TFDP1;CTDSP2;CEBPA;STOX2;ABLIM1;RAB15;ARRDC4;RALGDS;…
DMRT1-21621532	11	132	0.00893582	0.00313815	0.00579767	0.00268194	2.63145	-15.5814	FNDC3A;SHC1;DCUN1D1;BTBD19;FAM78B;ZEB2;NFX1;CNKSR3;ABLIM1;ZFP384;MARCKS
EWS-FLI1-20517297	39	574	0.0316816	0.0136462	0.0180354	3.31075e-06	1.24659	-15.7299	ATF2;MYC;FRS2;EML3;TSPYL5;MEX3B;CPEB2;CEP57;GLI3;SHF;PELI2;PRUNE2;NFIA;RNF141;RORA;SH3GLB2;COL27A1;ACAP2;TNKS;SLC9A3R1;BAG4;ZFP64;CCDC50;ADRA2C;MTUS1;INPP5B;CDV3;ZHX1;MTSS1;TOX4;POC5;SGK3;CAMKK2;CUX2;BASP1;FAM186B;SPRED2;UBE2Q2;RGS16
HOXD13-18407260	21	196	0.0170593	0.00465968	0.0123996	1.22587e-06	1.17979	-16.0592	MAML1;FBXO9;ICK;BTG2;TRIM8;JARID2;PAX6;CDC42EP3;NOL4;CHN2;ABI2;DLC1;HDDC3;ARID2;RAB37;EIF4G2;CHD9;WDR4;SIX3;TBP;GNG2
DNAJC2-21179169	60	899	0.0487409	0.0213727	0.0273682	1.51367e-08	0.906473	-16.3221	RFX1;CGGBP1;FLI1;MECP2;RORA;PSKH1;E4F1;SOCS6;RBM10;RCOR1;GRIPAP1;AKR1A1;PCNP;TACC1;RGS3;GPRIN1;UBE2I;DYRK2;LDB3;LMNB1;EPN1;CUEDC1;CREB5;CYGB;CD4;MYC;MBNL1;SOX12;NFATC3;JARID2;RARA;CDKN2D;MAGI2;MITF;PHF21B;ANKRD34A;MAFB;CDK4;LHX6;MAFK;DUSP10;CTDSPL;CTDSP2;ABLIM1;SMARCE1;KLF3;KLF9;RPS6KA3;RRAGD;CBFA2T3;MAPT;BEGAIN;RBM15B;APBA1;RALBP1;POLL;GAP43;RBMS3;MEIS2;CDK2AP1
TRP63-18441228	13	143	0.0105605	0.00339966	0.00716086	0.000547304	2.20005	-16.5235	SCMH1;PHLDA1;RUNX2;PPIF;HMOX1;SMAD7;MDM2;CPEB2;FOXM1;DUSP10;EFHD1;CDC42EP3;EVL
WT1-19549856	22	199	0.0178716	0.004731	0.0131407	4.25628e-07	1.13889	-16.7072	ITSN1;NUDT4;RASSF5;NLK;WWTR1;NEBL;SFXN3;SGK3;RYBP;DLC1;TACC1;NUCKS1;POU3F2;DLX5;PICALM;DNAJC5;RBM24;LEF1;UBQLN1;PRRX1;MARCKS;INSM1
SUZ12-16625203	69	1270	0.056052	0.0301928	0.0258592	1.92808e-06	1.2881	-16.95	MEF2A;HDGFRP3;ISL1;AR;NEBL;FLI1;RCSD1;PELI2;DLX1;DLX2;ZFP467;BCL2L11;TMEM28;CXXC4;U2AF2;TRIM44;HHIP;RASSF5;CALN1;ZFP503;UBE2J1;FOXF2;TMOD2;POU3F2;CNN3;A330008L17RIK;ZIC1;OLIG2;CREB1;CUEDC1;1700003E16RIK;CYGB;SOX21;MYC;PRDM16;REL;PAX6;CDKN2C;NFIA;NFIC;RIMS2;COL27A1;TPM1;HIC1;CACNB3;PGR;TOX;MAFB;LHX6;EFHD1;SGIP1;CEBPA;INSM1;FRAT1;SOX8;SOX9;EBF1;SNAP91;SGK3;MAPT;NOL4;KCTD8;OTX1;CBX2;YBX2;NETO1;SIX3;…
ELF1-20517297	56	1020	0.0454915	0.0242493	0.0212421	1.33715e-05	1.52911	-17.1603	EML3;MEPCE;MYH7B;SFXN3;RCSD1;JPH2;NEFH;EPS15L1;PLSCR3;VAMP2;EGLN2;GATAD2A;TAOK3;SLC25A42;UBFD1;MDM4;DBNDD2;PPP1R3E;CD2BP2;NUMBL;UBE2H;NAA40;LYL1;UBE2Q1;CYGB;RNF114;PRR14;CTBP1;FMN1;CLINT1;CIT;PLCB2;FOSB;FKBP5;AK1;WDR4;DNAJC8;WBP2;STOX2;RAB23;TNRC6C;HABP4;SRRM3;CAGE1;DND1;CHMP1B;PPP2CB;CUX1;ACBD5;CBX2;ARHGAP27;ARHGAP26;DLG4;SAFB;AKT1S1;WEE1
CTCF-18555785	92	1568	0.074736	0.0372774	0.0374586	1.1396e-09	0.836914	-17.2342	PKNOX2;SFXN3;MRVI1;SNX11;PPARD;EIF5A;0610040J01RIK;MLLT1;ZNRF1;CCDC85A;UBQLN4;CIZ1;NECAP2;NECAP1;CERK;FBXO9;KCTD11;MRPS12;THTPA;TOX4;PPIF;UBE2I;OLIG2;SHROOM1;MTF1;NSD1;FOSB;COL27A1;RAB37;TOX;FKBP5;DAB1;CEBPA;RFFL;ZFP319;TCERG1;RPS6KA3;ZZZ3;CITED2;LIMD1;CHMP1A;4833439L19RIK;RALGPS2;AMIGO3;PTS;PPP2CB;BC005624;APBA1;POU2F1;CBX2;CASP2;SNCB;EML1;HDDC3;SH3GLB1;SH3GLB2;ZBTB39;ATXN3;SH3BP5;USH1G;GCC1;RAS…
MYC-20876797	84	1406	0.0682372	0.0334261	0.0348112	2.8449e-09	0.916776	-18.0401	ATF2;ALKBH8;LSM12;TBPL1;PLAGL1;ZFP260;GATAD2A;FBXO28;RORA;EIF4ENIF1;MAP3K7;FOXP2;FOXP1;ITGAM;TRIM67;PPM1B;PPP1R12C;E2F5;CERK;HHIP;NUDT4;EPC1;FBXO9;KCTD12;RAB11FIP2;ICK;WNK1;RSRC1;AKR1A1;CTTNBP2NL;KIF9;SH3BGRL;PLEKHA1;POU3F1;COX6B2;HOOK3;DYRK2;PSIP1;LYL1;ZIC1;CYGB;VHL;PAFAH2;REL;TRIM2;JARID2;PAX6;CIT;AEBP2;FIGN;WWOX;CDKN2C;NFIA;FOSB;RNF141;TPD52;TPM4;TPM1;CACNB2;RHCG;CBFB;PHF21A;ESRRB;MAFG;ZFP64;R…
EWS-ERG-20517297	57	1038	0.0463038	0.0246773	0.0216265	1.11636e-05	1.60481	-18.2994	GMFB;ZDBF2;CAPNS1;FAM110B;CGGBP1;VTI1A;FLI1;UCK2;PPARD;EGLN1;GATAD2A;SNX15;FOXP1;MAX;CELF3;PARD3B;DBNDD2;SLC25A36;CERK;EPC1;TTBK2;WWTR1;PRG4;ZFX;STX16;CRIP2;PLEKHA1;FKBP1A;HOOK3;CHD7;RBM34;SOX11;PRR14;FAM149A;CLINT1;GLI3;RNF141;RIMS2;COL27A1;VASH2;BAG4;ESRRG;ZFP64;DUSP10;EFHD2;JAZF1;MTUS2;SRRM1;RRAGD;TRPM6;MTSS1;MAPT;RAI14;COBLL1;CBX5;YBX1;POLL
ETS1-20019798	106	1607	0.0861089	0.0382046	0.0479043	7.47839e-14	0.606003	-18.3159	ALKBH8;RC3H2;HEXIM2;MED15;MBD1;SLMAP;MAP3K7;NAF1;U2AF2;UBQLN1;NECAP2;CCDC94;FBXO9;CCDC86;FBF1;MAP1LC3B;TOX4;PTMA;PCNP;LMNB2;TBP;POLE3;SCRIB;PAFAH2;MEX3A;PHF23;NR1H2;RAB30;AKIRIN2;SLC7A6OS;WDR4;LCORL;CRK;ABLIM2;KRR1;ASXL1;VAPA;PANK3;SRRM2;COG3;ZNHIT6;ZRANB2;UBXN1;CHMP1B;NFX1;PURB;GPBP1L1;MRFAP1;RALBP1;ZMAT2;RPRD1B;OXSR1;AKT1S1;FAM168A;CAPN10;DAXX;TBPL1;VTI1A;EIF5;SASS6;TTLL9;TICAM1;MAX;ZBTB17;HMG2…
TFAP2A-17053090	117	1904	0.0950447	0.0452654	0.0497792	3.17099e-13	0.657102	-18.9111	ITSN1;PKNOX2;FNBP4;BAZ2A;EPB41L3;SNX12;SHF;NEFH;EPS15L1;EGLN2;MBD1;SLC9A3R1;BMF;MLLT1;MID1IP1;NECAP1;ATXN7L3;NUMBL;FBF1;RAB27B;ITGBL1;GRB2;RAB22A;MAP1LC3B;PCYT1B;SH3BGRL;OTUD5;CRTC3;FGF14;FGF13;EPN1;RNF6;GNG2;ATF7IP;MBNL2;ARMC7;PHC1;NFATC2;RARA;GAS7;NR1H3;HIPK3;TPM1;DYRK1A;CSNK1G2;TFDP1;DNAJC5;CEBPA;TUB;TNRC6C;ARRDC4;SRRM2;DCUN1D3;DCUN1D2;ZCCHC14;CHMP1B;TMED8;PTS;UBL4A;APBA3;LMO3;CBX2;ZCCHC2;SAFB…
SPI1-20517297	66	1249	0.0536149	0.0296936	0.0239214	7.54522e-06	1.62663	-19.1855	ZC3H12B;MYH7B;MTMR12;MECP2;SHF;CNOT6L;ARF6;TCOF1;TAOK3;PSKH1;STX7;TICAM1;DLX5;SOCS5;ITGAM;SNAP23;CXXC5;E2F6;USH1G;SMARCC2;PCYT1A;ZHX1;RNF144A;CNKSR3;PRKX;ALS2CL;CRTC3;TAB2;LDB3;LMNB1;UBE2Q2;ASAP3;PDLIM5;FBRS;TNIP1;MAML1;SOX12;FNDC3A;RRP7A;PHC1;ARPP21;FOSL2;FAM102A;CIT;PYGO2;CBFB;ZC3H4;DNAJC8;MARCKS;VAPA;FRAT1;KRT1;KLHDC8A;TMCC3;NFX1;CUX1;NUPL2;RALBP1;STAM2;PXK;DTX4;ZMAT3;DLG4;CASP9;NETO1;KLF16
ERG-20517297	64	1062	0.0519903	0.0252478	0.0267424	1.69431e-07	1.24433	-19.4001	ITSN1;SAMD14;PKNOX1;RC3H2;EID1;SF1;UCK2;EPS15L1;EGLN1;SNX22;TAOK3;SNX15;PDCD7;EIF4ENIF1;PSKH1;DLX1;UAP1;MDM2;E2F3;PRRX1;MMAB;OTUD6B;STX16;FAM196B;SERTAD2;MIB1;RGP1;TACC1;HNRNPUL2;PHF12;HOOK1;UBE2Q1;UBE2Q2;RBM18;CREB5;GOSR1;MBNL1;CTBP1;PRDM15;FAM149A;CPEB4;GLI3;TRIM8;NSD1;RALGAPA2;DYRK1A;RHCG;ANKRD34C;WDR4;LBH;PAPD7;DNAJC8;GOLGA4;FRAT1;KRT1;MAP4;FEZF2;CDV3;KCTD2;ZMAT3;NETO1;TRPS1;KLF16;FAM63A
CDKN2AIP-20523734	14	123	0.0113729	0.00292419	0.00844868	3.86386e-05	2.05671	-20.8988	EIF4ENIF1;TPM1;SCRIB;TOX;DTX4;CYB5R3;ATP5D;NKX2-1;SRPK2;CEP57;DYRK2;SOS1;RBMX;SNTB2
GLI1-17442700	8	73	0.00649878	0.00173549	0.00476329	0.00214726	3.65505	-22.455	HHIP;FHL1;A330008L17RIK;TRPS1;GRIPAP1;PRKCE;RAI14;PHF21A
KLF4-18264089	13	102	0.0105605	0.00242493	0.00813559	2.49387e-05	2.21882	-23.5175	SOX2;SALL1;PHC1;SP1;MKRN1;ZIC3;JARID2;DNMT3A;RAD23B;BNIP3;FOXJ2;RYBP;KLF9
KLF2-18264089	13	102	0.0105605	0.00242493	0.00813559	2.49387e-05	2.2477	-23.8235	SOX2;SALL1;PHC1;SP1;MKRN1;ZIC3;JARID2;DNMT3A;RAD23B;BNIP3;FOXJ2;RYBP;KLF9
KLF5-18264089	13	102	0.0105605	0.00242493	0.00813559	2.49387e-05	2.27657	-24.1296	SOX2;SALL1;PHC1;SP1;MKRN1;ZIC3;JARID2;DNMT3A;RAD23B;BNIP3;FOXJ2;RYBP;KLF9
EGR1-19374776	9	68	0.00731113	0.00161662	0.00569451	0.000336226	3.26006	-26.0731	TCERG1;AKT1;DMTF1;FKBP5;SHC1;MLLT11;CDK4;SP1;GRB2
JARID1A-20064375	126	2171	0.102356	0.0516131	0.0507428	1.51379e-12	1.02095	-27.7867	ATF2;MED22;EGLN2;PDCD7;MAP3K7;PSKH1;SHC1;LIN7C;AMDHD2;ZKSCAN5;EIF5A;MTHFSD;U2AF2;UBQLN1;CABLES2;NECAP2;TRIM39;CCDC94;CCDC86;OTUD6B;TOX4;KIF9;RAP2A;PCNP;AGGF1;OTUD5;UBXN2A;COX10;HP1BP3;TBP;EPN1;POLE3;SCRIB;ATG12;RRP7A;PHF23;JARID2;MTF1;PPP1R8;ZFP384;NR1H2;RRP1B;ANKRD13C;PYGO2;SLC7A6OS;WDR4;DNAJC8;KRR1;ZZZ3;FUBP3;RBAK;UBXN1;NKAP;CHMP1B;PPHLN1;NFX1;PURB;BC005624;GPBP1L1;2310057M21RIK;NUPL2;ZMAT2;RPR…
RAD21-21589869	116	2036	0.0942323	0.0484036	0.0458287	3.70966e-11	1.18103	-28.3654	FAM110B;PKNOX2;SHB;PLAGL1;FBXO28;CISH;SLC9A3R1;0610040J01RIK;MSL2;MLLT1;MTHFSD;NECAP2;NUDT4;LGALS9;SMARCC2;KCTD11;EIF1A;ZBTB4;ITGBL1;DHRS11;THTPA;RNF144A;AGGF1;TACC1;CRTC3;UBE2H;GFOD2;ASAP3;ARMC7;ATG12;SETD1A;NFATC2;PAFAH2;FOSL2;PPP1R8;HIPK3;NFIC;FOSB;VASH2;TOX;WDR4;AP1G2;TFDP1;CRK;ABLIM2;KRR1;SRRM1;CAGE1;TLN1;DCUN1D3;DCUN1D2;AU022252;FAM43A;ARGLU1;CITED2;CHMP1A;MTSS1;PTS;NUPL2;YBX2;CASP2;CYB5R3;…
AR-20517297	114	2047	0.0926076	0.0486651	0.0439425	1.99454e-10	1.40472	-31.3751	PKNOX2;RC3H2;BAZ2A;EPB41L2;MTMR12;TFCP2L1;CNOT6L;EGLN1;PDCD7;CASC3;CISH;KCNH6;SNAP23;NKX3-1;BCAS1;E2F3;TMEM170B;RNF144A;FAM196B;AGGF1;GPRIN1;TBC1D12;UBE2F;ARMC7;ATG12;BCL10;NFATC2;FGF2;COL27A1;PYGO1;RAB30;TOX;STOX2;SRRM4;COG3;SRRM1;ARGLU1;PUM2;ZZZ3;KLHDC8A;CITED1;LIMD1;CHMP1B;FEZF2;TMED8;NUPL2;CWC25;RASL12;RPRD1B;THRB;GAP43;RBMS1;CAPN10;CDK2AP1;RFX3;AR;VTI1A;FLI1;LRRC1;UBAP1;ZBTB34;MAX;ATXN3;ATXN…

## Sheet: SuppData3 E2K brown.results_kin
Kinase	Substrates in Input	Substrates in Database	Input Fraction	Database Fraction	Difference	P-value	Z-score	Combined Score	Substrates
MAPK1	36	312	0.371134	0.0688286	0.302305	4.65586e-17	-2.2592	84.9592	RB1;RPS6KA5;MYC;RPS6KA1;MYB;CSNK2A1;RUNX1;AR;TP53;TWIST1;GATA2;JUN;CREBBP;PARP1;SREBF2;RELA;PAK2;CDX2;STAT1;STAT3;NR3C1;EP300;MITF;MYCN;MAPKAPK2;SMAD3;ESR1;NR4A1;SP1;TCF3;GSK3B;PPP2R5C;CEBPB;MAPK1;PDX1;MAPK14
CSNK2A1	42	521	0.43299	0.114935	0.318055	7.57538e-15	-2.19892	71.4953	ATF1;SPI1;MYC;MYB;AKT1;CSNK2A1;CREBBP;JUN;NFATC1;PAX3;ASCL1;STAT1;PIAS1;MAX;CREM;SP1;MDM2;GTF2A1;HDAC2;HDAC1;SRF;RPS6KA5;TP53;TWIST1;EGR1;SMARCA4;BRCA1;RELA;SUZ12;CTNNB1;NR3C1;MYCN;VDR;ESR1;TCF4;THRA;CREB1;LEF1;MAPK1;VHL;PDX1;MAPK14
MAPK14	34	461	0.350515	0.101699	0.248817	8.64092e-11	-2.2678	52.5494	RB1;MYC;MYB;AKT1;CSNK2A1;CSNK2A2;AR;JUN;NFATC1;NCOR1;STAT1;STAT3;MITF;MAPKAPK2;MAX;SIN3A;RPS6KA5;RPS6KA1;RUNX1;TP53;TWIST1;ATR;RELA;CDX2;NR3C1;MYCN;SMAD3;ESR1;TCF3;CHD3;CREB1;MAPK1;PDX1;MAPK14
MAPK3	26	251	0.268041	0.0553717	0.21267	3.03033e-11	-2.13956	51.8196	RPS6KA5;MYC;RPS6KA1;MYB;AKT1;RUNX1;AR;TP53;TWIST1;JUN;NFATC1;SREBF2;TAL1;PAK2;STAT1;STAT3;NR3C1;MITF;MAPKAPK2;ESR1;SP1;TCF3;GSK3B;CEBPB;MAPK3;MAPK14
HIPK2	14	43	0.14433	0.00948599	0.134844	4.43344e-12	-1.79313	46.8757	SUMO1;MYB;EP300;TP63;CREBBP;UBE2I;PDX1;PAX6;RUNX1;KAT2B;CREB1;MDM2;TP53;TP73
GSK3B	37	600	0.381443	0.132363	0.249081	1.24496e-09	-2.0514	42.0622	RB1;MYC;MYB;CSNK2A1;AR;JUN;NFATC2;PAX3;NCOR1;TAL1;STAT1;STAT3;MITF;MAPKAPK2;CREM;ABL1;MDM2;SIN3A;CEBPB;KAT5;RPS6KA1;RUNX1;TP53;BRCA1;RELA;CDX2;CTNNB1;NR3C1;MYCN;ESR1;TCF3;GSK3B;CHD3;CREB1;LEF1;VHL;PDX1
AKT1	23	256	0.237113	0.0564747	0.180639	7.00512e-09	-2.02473	38.0176	AKT1;CSNK2A1;AR;TWIST1;GATA2;CREBBP;NFATC2;BRCA1;TAL1;STAT1;CTNNB1;EP300;MAPKAPK2;SMAD3;ESR1;NR4A1;MDM2;GSK3B;GSK3A;THRA;PPP2R5C;CREB1;VIM
MAPK8	24	275	0.247423	0.0606662	0.186756	5.22725e-09	-1.93428	36.8855	MYC;AR;TP53;TWIST1;JUN;NFATC2;NFATC1;TP73;CDKN2A;STAT1;STAT3;CTNNB1;NR3C1;MAPKAPK2;ABL1;SMAD3;ESR1;NR4A1;SP1;CEBPB;LEF1;MAPK1;MAPK3;MAPK14
RPS6KA5	11	37	0.113402	0.00816236	0.10524	2.28896e-09	-1.76041	35.0237	ATF1;CEBPB;SRF;RELA;RPS6KA5;EP300;CREBBP;STAT1;STAT3;NR4A1;CREB1
MAPKAPK2	11	40	0.113402	0.00882418	0.104578	4.58117e-09	-1.46386	28.1079	SRF;RPS6KA1;AKT1;MAPK14;ESR1;CREB1;MAPKAPK2;MDM2;TCF3;VIM;TP53
CSNK2A2	21	267	0.216495	0.0589014	0.157593	3.03533e-07	-1.73589	26.0518	ATF1;MYC;MYB;TP53;EGR1;CREBBP;JUN;RELA;CTNNB1;MYCN;MAX;CREM;VDR;ESR1;SP1;THRA;SIN3A;GTF2A1;HDAC2;HDAC1;MAPK3
ATM	17	177	0.175258	0.039047	0.136211	3.69929e-07	-1.73167	25.6459	NR3C1;TRIM28;KAT5;AKT1;EP300;TP63;MEN1;TP53;ABL1;JUN;SP1;MDM2;BRCA1;CREB1;SRF;CTNNB1;VIM
RPS6KA1	12	75	0.123711	0.0165453	0.107166	1.74328e-07	-1.48443	23.1012	GSK3B;RPS6KA1;MITF;CREB1;CEBPB;SRF;MAPK1;MAPK3;CREBBP;ESR1;NR4A1;NR4A3
GSK3A	10	44	0.103093	0.0097066	0.0933862	1.13866e-07	-1.35061	21.5938	GSK3A;CREM;MYC;JUN;MITF;NFATC1;PPP2R5C;CREB1;CTNNB1;TP53
ABL1	15	151	0.154639	0.0333113	0.121328	1.32386e-06	-1.46851	19.8763	RB1;EP300;TP63;TP53;ABL1;JUN;ESR1;MDM2;ATR;TP73;BRCA1;CREB1;MYOD1;CEBPB;CTNNB1
RPS6KA3	23	365	0.237113	0.0805206	0.156593	3.01663e-06	-1.54131	19.5922	TRIM28;RPS6KA1;AR;TP53;CREBBP;NFATC2;TAL1;PAK2;STAT3;WT1;SMAD3;ESR1;NR4A1;MDM2;GSK3B;GSK3A;THRA;CREB1;CEBPB;SRF;MAPK1;MAPK3;VIM
TAF1	9	42	0.0927835	0.00926539	0.0835181	7.86644e-07	-1.15316	16.2082	RB1;GTF2A1;GTF2B;RELA;JUN;CREB1;MDM2;TAF4;TP53
PRKACA	23	395	0.237113	0.0871388	0.149975	1.0676e-05	-1.31334	15.0345	RB1;ATF1;PRKACA;CREBBP;NFATC1;TAL1;WT1;CREM;HAND2;CEBPB;SRF;SOX9;TP53;RELA;CTNNB1;NR3C1;EP300;VDR;ESR1;GSK3B;GSK3A;CREB1;VIM
CDK2	29	606	0.298969	0.133686	0.165283	2.26264e-05	-1.32832	14.2082	RB1;MYC;MYB;CSNK2A1;CREBBP;JUN;NFATC2;NCOR1;STAT3;MITF;MAPKAPK2;MDM2;SIN3A;CEBPB;RPS6KA1;TP63;RUNX1;TP53;TP73;BRCA1;CDX2;EP300;MYCN;SMAD3;ESR1;TCF3;CHD3;MYOD1;VIM
PRKCZ	11	104	0.113402	0.0229429	0.0904592	2.26272e-05	-1.09711	11.7351	AKT1;CREBBP;NFATC2;SP1;GSK3B;GSK3A;RELA;MAPK1;VHL;MAPK3;STAT3
MAP2K1	8	39	0.0824742	0.00860357	0.0738707	4.45411e-06	-0.942773	11.6165	GSK3B;MYC;MAPK1;EP300;MAPK3;MAPK14;TAL1;MYOD1
RPS6KA2	7	21	0.0721649	0.00463269	0.0675323	1.1774e-06	-0.732794	10.0043	GSK3B;SRF;ESR1;CREB1;RPS6KA1;MAPK1;MAPK3
PRKCD	12	146	0.123711	0.0322083	0.0915031	9.48237e-05	-1.06515	9.86701	TRIM28;EP300;TP53;CREBBP;TP73;GSK3B;GSK3A;PPP2R5C;MAPK1;MAPK3;STAT1;STAT3
MAPK10	11	121	0.113402	0.0266931	0.0867089	8.19859e-05	-0.932538	8.77422	NR3C1;CDC20;MYC;MAPKAPK2;TP53;JUN;NFATC2;NFATC1;MYOD1;CEBPB;CDKN2A
MAPK9	12	162	0.123711	0.0357379	0.0879734	0.00023806	-0.823438	6.86993	RB1;CDC20;KAT5;MYC;MAPKAPK2;TP53;JUN;SMAD3;NFATC2;STAT3;PDX1;CTNNB1
CAMK4	7	25	0.0721649	0.00551511	0.0666498	3.12514e-06	-0.51716	6.55554	CREM;RELA;EP300;CREBBP;PPP2R5C;CREB1;CAMK4
PRKDC	14	227	0.14433	0.0500772	0.0942527	0.000424927	-0.651109	5.05494	AKT1;TP53;JUN;BRCA1;PARP1;RELA;NR3C1;ABL1;SP1;MDM2;THRA;SRF;PDX1;VIM
CDK4	7	51	0.0721649	0.0112508	0.0609141	0.000178908	-0.510727	4.40688	RB1;BRCA1;MYC;MYOD1;SMAD3;CDKN2A;TCF3
RPS6KB1	7	48	0.0721649	0.010589	0.0615759	0.000127098	-0.420896	3.77567	GSK3B;AKT1;TP63;CREM;MAPK1;ESR1;MDM2
CHUK	8	90	0.0824742	0.0198544	0.0626198	0.000926797	-0.354841	2.47813	MYC;PIAS1;NCOR1;TP53;RELA;CREBBP;ESR1;CTNNB1
RPS6KA4	6	10	0.0618557	0.00220604	0.0596496	4.89536e-07	-0.0896839	1.30309	ATF1;CREB1;MAPK1;MAPK14;RELA;MAPK3
ATR	7	63	0.0721649	0.0138981	0.0582669	0.000581184	-0.159676	1.18965	BRCA1;CREB1;TP53;CDKN2A;SP1;MDM2;ATR
CSNK1A1	8	99	0.0824742	0.0218398	0.0606344	0.00164494	-0.169357	1.08559	ATF1;RPS6KA1;TP53;CREM;CREB1;VHL;KCNIP3;CTNNB1
PRKCA	20	487	0.206186	0.107434	0.0987512	0.00354453	-0.123985	0.699564	AKT1;AR;CREBBP;NFATC2;NFATC1;CREM;ABL1;HAND2;SRF;TP53;TP73;BRCA1;EP300;SMAD3;VDR;ESR1;GSK3B;GSK3A;MYOD1;VIM
CAMK2G	6	40	0.0618557	0.00882418	0.0530315	0.000344534	-0.00883224	0.0704222	ATF1;CEBPB;CREM;SMAD3;STAT1;CREB1
CDK7	6	31	0.0618557	0.00683874	0.0550169	9.9555e-05	0.00626668	-0.0577462	THRA;BRCA1;VDR;ESR1;AR;TP53
INSR	1	175	0.0103093	0.0386058	-0.0282965	0.977618	7.32927	-0.165911	ABL1
AURKA	6	51	0.0618557	0.0112508	0.0506048	0.00110887	0.0506178	-0.344425	GSK3B;BRCA1;CDC20;PRKACA;AR;TP53
MAP3K8	6	54	0.0618557	0.0119126	0.049943	0.0014545	0.122435	-0.799877	RPS6KA1;CREB1;RELA;ABL1;MAPK1;MAPK3
TRIM28	6	21	0.0618557	0.00463269	0.057223	1.50147e-05	0.0932534	-1.03572	CEBPB;CHD3;NR3C1;ESR1;TRIM28;VIM
MAP3K14	2	145	0.0206186	0.0319876	-0.0113691	0.820236	7.47379	-1.48103	RUVBL2;MAPK3
CSNK1E	9	148	0.0927835	0.0326495	0.060134	0.00524472	0.316722	-1.66296	MYB;TP53;MAX;ESR1;GTF2A1;HDAC2;HDAC1;PAK2;CTNNB1
PRKCB	13	283	0.134021	0.0624311	0.0715896	0.00819457	0.408333	-1.96175	RB1;AKT1;TP53;TP73;PAK2;STAT3;CTNNB1;NR4A1;GSK3B;GSK3A;CREB1;CEBPB;VIM
PTK2B	1	70	0.0103093	0.0154423	-0.00513303	0.780165	7.97842	-1.98064	STAT3
CDK1	21	567	0.216495	0.125083	0.0914121	0.00886839	0.530006	-2.50442	RB1;MYC;MYB;CSNK2A1;AR;NFATC2;TAL1;MAPKAPK2;CREM;ABL1;CEBPB;CDC20;KAT5;RUNX1;TP53;TP73;BRCA1;ESR1;MYOD1;LEF1;VIM
CDK5	7	103	0.0721649	0.0227223	0.0494427	0.007818	0.530858	-2.57536	NR3C1;MYC;TP53;ABL1;STAT3;CTNNB1;VIM
TRIM24	7	95	0.0721649	0.0209574	0.0512075	0.00519547	0.582296	-3.06286	THRA;NR3C1;TRIM28;SUMO1;AR;VDR;ESR1
MAP3K3	4	193	0.0412371	0.0425767	-0.00133955	0.597838	7.0374	-3.62029	BRCA1;RUVBL2;PFDN5;VIM
ZAP70	1	51	0.0103093	0.0112508	-0.000941549	0.669506	9.1127	-3.65616	MAPK14
LYN	3	144	0.0309278	0.031767	-0.000839207	0.600685	7.30584	-3.72367	CSNK2A1;ABL1;PAK2
IGF1R	3	144	0.0309278	0.031767	-0.000839207	0.600685	7.35736	-3.74993	ESR1;MDM2;STAT3
RIPK3	2	95	0.0206186	0.0209574	-0.000338867	0.608425	7.67193	-3.81204	RUVBL2;VIM
RET	5	40	0.0515464	0.00882418	0.0427222	0.00229015	0.692163	-4.20776	MAPK1;AKT1;MAPK3;STAT3;MAPK14
CAMK1	5	24	0.0515464	0.00529451	0.0462519	0.000290045	0.524801	-4.27476	ATF1;EP300;PPP2R5C;CREB1;CAMK4
PAK2	5	48	0.0515464	0.010589	0.0409574	0.0047153	0.799957	-4.28532	MYC;ABL1;PAK2;JUN;VIM
CAMK2D	5	35	0.0515464	0.00772116	0.0438252	0.00133953	0.653598	-4.32383	CEBPB;CREM;STAT1;CREB1;VIM
PRKCQ	1	45	0.0103093	0.0099272	0.000382078	0.624226	9.75077	-4.59497	AKT1
PRKD1	5	54	0.0515464	0.0119126	0.0396338	0.0074545	0.962278	-4.71414	AKT1;CREB1;ABL1;JUN;CTNNB1
CSNK2B	5	43	0.0515464	0.00948599	0.0420604	0.00305483	0.843253	-4.8833	BRCA1;CSNK2A1;ESR1;CTNNB1;TP53
TGFBR1	4	166	0.0412371	0.0366203	0.00461677	0.480044	6.65625	-4.88488	CDC20;SMAD3;STAT1;CTNNB1
CDK9	5	38	0.0515464	0.00838297	0.0431634	0.00186489	0.830695	-5.22055	RB1;RELA;SMAD3;AR;TP53
CHEK2	5	41	0.0515464	0.00904478	0.0425016	0.00252742	0.879516	-5.25999	RB1;BRCA1;PPP2R5C;MDM2;TP53
LCK	8	161	0.0824742	0.0355173	0.0469569	0.0244195	1.49361	-5.54483	NR3C1;ABL1;ESR1;MAPK1;MAPK3;STAT1;STAT3;MAPK14
MTOR	6	86	0.0618557	0.018972	0.0428837	0.0121225	1.26144	-5.56632	MYC;AKT1;PPP2R5C;MYCN;JUN;STAT3
CDK6	5	25	0.0515464	0.00551511	0.0460313	0.000342329	0.700656	-5.59105	RB1;CDKN2A;RUNX1;AR;CTNNB1
MAP3K5	1	40	0.0103093	0.00882418	0.0014851	0.581844	10.6283	-5.75577	MAPK14
ADRBK1	5	56	0.0515464	0.0123538	0.0391925	0.00857261	1.217	-5.79193	PRKACA;MAPK3;KCNIP3;MAPK14;MDM2
PLK1	6	92	0.0618557	0.0202956	0.0415601	0.0161937	1.44591	-5.96168	YY1;TP53;MDM2;CTNNB1;VIM;TP73
CAMK2A	6	105	0.0618557	0.0231635	0.0386922	0.0280736	1.68394	-6.01659	CREM;PPP2R5C;CREB1;CEBPB;SRF;VIM
EPHB2	1	38	0.0103093	0.00838297	0.00192631	0.563596	10.6511	-6.10755	ABL1
PDGFRB	2	62	0.0206186	0.0136775	0.00694108	0.389619	7.36226	-6.93955	STAT1;STAT3
SGK1	5	76	0.0515464	0.0167659	0.0347805	0.0266442	1.9404	-7.03429	GSK3B;GSK3A;CREB1;MAPK1;CTNNB1
PRKACB	6	120	0.0618557	0.0264725	0.0353831	0.0476681	2.31232	-7.03753	RPS6KA1;MITF;TP53;EGR1;SMAD3;VIM
PRKCG	2	61	0.0206186	0.0134569	0.00716168	0.382119	7.45414	-7.17106	GSK3B;GSK3A
EGFR	7	247	0.0721649	0.0544893	0.0176756	0.281885	5.67061	-7.18043	AR;STAT1;STAT3;CTNNB1;ESR1;CEBPB;MAPK1
YES1	1	36	0.0103093	0.00794176	0.00236752	0.54456	11.9816	-7.28216	PAK2
KIT	2	59	0.0206186	0.0130157	0.00760289	0.367007	7.37083	-7.38834	ABL1;STAT1
ALK	4	25	0.0412371	0.00551511	0.035722	0.0028767	1.27886	-7.48276	RELA;STAT3;MDM2;TP53
RAF1	5	84	0.0515464	0.0185308	0.0330156	0.0379172	2.30476	-7.54199	RB1;NR3C1;MYC;AR;MAPK1
BTK	2	59	0.0206186	0.0130157	0.00760289	0.367007	7.6617	-7.6799	TP53;RELA
CSNK1D	5	85	0.0515464	0.0187514	0.032795	0.0395039	2.4474	-7.90842	AKT1;TP53;SRF;MDM2;CTNNB1
JAK2	5	92	0.0515464	0.0202956	0.0312508	0.0517423	2.68195	-7.94253	BRCA1;MAPK1;MAPK3;STAT1;STAT3
TYK2	1	30	0.0103093	0.00661813	0.00369114	0.482382	11.3602	-8.28181	STAT1
SRC	10	346	0.103093	0.0763291	0.0267636	0.209675	5.32977	-8.32616	AKT1;AR;PAK2;STAT1;STAT3;CTNNB1;ABL1;ESR1;THRA;SRF
FYN	8	216	0.0824742	0.0476506	0.0348237	0.0958416	3.58411	-8.40495	CSNK2A1;PAK2;STAT1;CTNNB1;NR3C1;MAX;ABL1;MAPK14
MAP3K1	6	139	0.0618557	0.030664	0.0311917	0.0823857	3.37571	-8.42692	RUVBL2;UBE2I;ESR1;MAPK1;STAT3;VIM
PRKG1	5	114	0.0515464	0.0251489	0.0263975	0.10312	3.75725	-8.53595	NFATC1;CREB1;SRF;PAK2;VIM
HCK	3	77	0.0309278	0.0169865	0.0139413	0.234737	5.91568	-8.57354	ABL1;PAK2;STAT3
PTK2	4	95	0.0412371	0.0209574	0.0202797	0.152705	4.57031	-8.58876	SUMO1;PIAS1;TP53;STAT1
PAK1	5	92	0.0515464	0.0202956	0.0312508	0.0517423	2.92437	-8.66046	CSNK2A1;CSNK2A2;ABL1;ESR1;VIM
MAP3K7	4	102	0.0412371	0.0225017	0.0187355	0.181225	5.1075	-8.72368	RUVBL2;SMAD3;RELA;STAT3
ERBB2	5	125	0.0515464	0.0275756	0.0239708	0.135765	4.44056	-8.86702	ESR1;NCOR1;STAT1;STAT3;CTNNB1
FGFR1	2	50	0.0206186	0.0110302	0.00958833	0.29757	7.40474	-8.97533	RPS6KA1;CREBBP
BCR	2	48	0.0206186	0.010589	0.0100295	0.281938	7.20118	-9.11719	TP53;ABL1
PRKCE	4	70	0.0412371	0.0154423	0.0257948	0.068542	3.44405	-9.23111	CREB1;MAPK1;MAPK3;STAT3
PKN1	1	30	0.0103093	0.00661813	0.00369114	0.482382	12.8355	-9.35728	VIM
ACVR1	3	70	0.0309278	0.0154423	0.0154855	0.196275	5.79713	-9.43912	CREBBP;STAT1;VDR
RIPK2	2	48	0.0206186	0.010589	0.0100295	0.281938	7.71171	-9.76355	UBE2I;VIM
IKBKB	4	87	0.0412371	0.0191926	0.0220445	0.122498	4.66454	-9.79395	PARP1;RELA;CDKN2A;CTNNB1
AKT2	4	41	0.0412371	0.00904478	0.0321923	0.0139878	2.30206	-9.82879	GSK3B;AKT1;ESR1;CTNNB1
SYK	4	85	0.0412371	0.0187514	0.0224857	0.115392	4.5689	-9.86619	RPS6KA1;MAPK3;STAT1;STAT3
PRKAA1	4	41	0.0412371	0.00904478	0.0321923	0.0139878	2.31856	-9.89926	RB1;EP300;PPP2R5C;TP53
JAK1	3	66	0.0309278	0.0145599	0.0163679	0.175078	5.68842	-9.91222	BRCA1;STAT1;STAT3
MAPK11	1	27	0.0103093	0.00595632	0.00435296	0.448214	12.4902	-10.0232	JUN
PIM1	4	27	0.0412371	0.00595632	0.0352808	0.00369106	1.79922	-10.0789	RELA;MYC;NFATC1;MDM2
KDR	2	42	0.0206186	0.00926539	0.0113532	0.23501	6.98882	-10.1207	STAT1;CTNNB1
TEC	1	25	0.0103093	0.00551511	0.00479417	0.424205	11.9276	-10.2284	TP53
CHEK1	4	35	0.0412371	0.00772116	0.033516	0.00849336	2.17484	-10.3707	RB1;RELA;TP53;TP73
IRAK1	4	39	0.0412371	0.00860357	0.0326335	0.0119591	2.3537	-10.4181	SUMO1;JUN;STAT3;MAPK14
FGFR3	2	44	0.0206186	0.0097066	0.010912	0.25063	7.56515	-10.4685	STAT1;STAT3
NLK	5	14	0.0515464	0.00308846	0.0484579	3.35341e-05	1.02014	-10.5104	CREBBP;LEF1;STAT3;MYB;TCF4
MAPKAPK5	4	20	0.0412371	0.00441209	0.036825	0.00139435	1.63792	-10.7699	JUN;MAPK14;MAPK1;TP53
TBK1	3	59	0.0309278	0.0130157	0.0179122	0.139781	5.55563	-10.9317	RUVBL2;AKT1;RELA
MARK3	1	26	0.0103093	0.00573572	0.00457356	0.436336	13.3066	-11.0357	MITF
IKBKE	3	60	0.0309278	0.0132363	0.0176916	0.144664	5.73555	-11.0888	RELA;STAT1;ESR1
PDPK1	3	48	0.0309278	0.010589	0.0203388	0.0903326	4.77989	-11.4921	RPS6KA1;AKT1;PRKACA
ROCK1	2	44	0.0206186	0.0097066	0.010912	0.25063	8.41844	-11.6492	SOX9;VIM
CSK	3	47	0.0309278	0.0103684	0.0205594	0.0862741	4.84495	-11.8712	RB1;CREBBP;CTNNB1
NTRK1	2	39	0.0206186	0.00860357	0.012015	0.211712	7.67149	-11.9102	ABL1;MAPK3
ABL2	1	23	0.0103093	0.0050739	0.00523538	0.399162	13.3122	-12.2257	CEBPB
ROCK2	1	25	0.0103093	0.00551511	0.00479417	0.424205	14.2904	-12.2546	VIM
MET	2	38	0.0206186	0.00838297	0.0122356	0.203998	7.76073	-12.3368	STAT3;CTNNB1
TTN	1	26	0.0103093	0.00573572	0.00457356	0.436336	15.0462	-12.4785	FHL2
AURKB	3	43	0.0309278	0.00948599	0.0214418	0.0708641	4.77566	-12.6411	RB1;VIM;TP53
EIF2AK2	3	42	0.0309278	0.00926539	0.0216624	0.067226	4.79238	-12.938	STAT1;STAT3;TP53
MAP2K4	1	23	0.0103093	0.0050739	0.00523538	0.399162	14.125	-12.9722	MAPK14
FES	1	23	0.0103093	0.0050739	0.00523538	0.399162	14.4456	-13.2667	STAT3
PDK1	3	31	0.0309278	0.00683874	0.0240891	0.0333735	4.16904	-14.1747	RPS6KA1;AKT1;PRKACA
TGFBR2	2	37	0.0206186	0.00816236	0.0124562	0.196318	8.85774	-14.4206	SMAD3;CTNNB1
BRAF	1	21	0.0103093	0.00463269	0.00567658	0.373041	14.9321	-14.724	MAPK1
JAK3	2	35	0.0206186	0.00772116	0.0128974	0.181079	8.73701	-14.93	STAT1;STAT3
FLT1	3	23	0.0309278	0.0050739	0.0258539	0.0163465	3.6304	-14.9345	STAT1;STAT3;CTNNB1
CAMK2B	2	32	0.0206186	0.00705934	0.0135592	0.158605	8.2816	-15.2492	CEBPB;CREB1
MST1R	1	19	0.0103093	0.00419148	0.00611779	0.345798	14.5241	-15.4232	RELA
PDGFRA	2	31	0.0206186	0.00683874	0.0137798	0.151238	8.19916	-15.4874	STAT1;STAT3
GRK5	1	19	0.0103093	0.00419148	0.00611779	0.345798	14.7895	-15.705	TP53
MAP3K10	1	21	0.0103093	0.00463269	0.00567658	0.373041	16.0414	-15.8179	TCF3
MAPK7	1	20	0.0103093	0.00441209	0.00589719	0.359563	15.4748	-15.8286	MYC
MAP2K3	3	20	0.0309278	0.00441209	0.0265157	0.0116491	3.55529	-15.83	SMAD3;MAPK14;MAPK3
DAPK1	3	21	0.0309278	0.00463269	0.0262951	0.013114	3.81126	-16.5183	MAPK1;TP53;MAPK3
TNK2	2	27	0.0206186	0.00595632	0.0146622	0.122562	7.9743	-16.7391	AKT1;AR
MAP3K2	1	18	0.0103093	0.00397088	0.0063384	0.33174	15.2424	-16.8186	MAPK1
CDK3	3	30	0.0309278	0.00661813	0.0243097	0.0308864	4.87713	-16.9599	ATF1;RB1;JUN
MKNK1	4	13	0.0412371	0.00286786	0.0383693	0.000349506	2.21736	-17.648	MAPK14;MAPK1;PAK2;MAPK3
MAP4K1	2	25	0.0206186	0.00551511	0.0151034	0.108793	7.98769	-17.7192	ABL1;MAPK1
STK11	2	32	0.0206186	0.00705934	0.0135592	0.158605	9.64727	-17.7639	SMARCA4;TP53
PBK	1	18	0.0103093	0.00397088	0.0063384	0.33174	16.3118	-17.9985	TP53
HIPK3	2	26	0.0206186	0.00573572	0.0148828	0.115624	8.36723	-18.0516	SUMO1;AR
PKD1	2	27	0.0206186	0.00595632	0.0146622	0.122562	8.60023	-18.0531	CTNNB1;VIM
CLK1	1	17	0.0103093	0.00375028	0.006559	0.317383	15.9672	-18.3247	ABL1
CSNK1G1	3	24	0.0309278	0.00529451	0.0256333	0.0181155	4.7421	-19.0205	NFATC1;CTNNB1;TP53
DYRK1A	2	22	0.0206186	0.0048533	0.0157653	0.0890173	7.89131	-19.0885	CREB1;TP53
MARK2	1	17	0.0103093	0.00375028	0.006559	0.317383	17.0817	-19.6037	GSK3B
PRKAA2	1	17	0.0103093	0.00375028	0.006559	0.317383	17.6591	-20.2665	TP53
ILK	2	25	0.0206186	0.00551511	0.0151034	0.108793	9.17902	-20.3619	GSK3A;AKT1
DAPK3	2	23	0.0206186	0.0050739	0.0155447	0.0954814	8.68155	-20.3914	MDM2;TP53
PRKG2	1	17	0.0103093	0.00375028	0.006559	0.317383	18.0349	-20.6977	CREB1
FGR	2	22	0.0206186	0.0048533	0.0157653	0.0890173	8.57371	-20.7392	CSNK2A1;VDR
CDC7	1	18	0.0103093	0.00397088	0.0063384	0.33174	18.8946	-20.8484	CDKN2A
NTRK3	2	19	0.0206186	0.00419148	0.0164271	0.0704934	8.0147	-21.2569	JUN;MAPK1
SGK3	3	13	0.0309278	0.00286786	0.02806	0.00409512	3.91851	-21.5438	GSK3B;GSK3A;CREB1
PLK3	3	18	0.0309278	0.00397088	0.026957	0.0090165	4.58084	-21.5698	JUN;MAPK1;TP53
TRIB3	3	16	0.0309278	0.00352967	0.0273982	0.00677093	4.46017	-22.2791	RELA;KAT5;AKT1
TRRAP	4	11	0.0412371	0.00242665	0.0388105	0.000207018	2.68926	-22.8122	MAX;MYC;BRCA1;ESR1
MINK1	1	14	0.0103093	0.00308846	0.00722082	0.272455	17.5505	-22.8205	MAPK14
MELK	1	14	0.0103093	0.00308846	0.00722082	0.272455	17.6451	-22.9436	SMAD3
STK4	2	18	0.0206186	0.00397088	0.0166477	0.0646384	8.38663	-22.9705	ABL1;TP53
PRKCH	2	17	0.0206186	0.00375028	0.0168683	0.0589592	8.35133	-23.6419	GSK3B;GSK3A
LIMK1	1	15	0.0103093	0.00330907	0.00700021	0.287747	19.6012	-24.4167	MAPKAPK2
CDK8	1	15	0.0103093	0.00330907	0.00700021	0.287747	20.3711	-25.3757	SMAD3
MKNK2	3	9	0.0309278	0.00198544	0.0289424	0.00170972	3.9904	-25.4245	MAPK1;MAPK14;ESR1
MAP2K6	2	17	0.0206186	0.00375028	0.0168683	0.0589592	8.98742	-25.4426	MAPK14;RELA
FER	2	16	0.0206186	0.00352967	0.0170889	0.0534657	8.73122	-25.5713	STAT3;CTNNB1
WEE1	2	18	0.0206186	0.00397088	0.0166477	0.0646384	9.41858	-25.797	SMAD3;CSNK2A1
MYLK	2	16	0.0206186	0.00352967	0.0170889	0.0534657	9.16914	-26.8538	PAK2;MAPK3
NEK2	1	11	0.0103093	0.00242665	0.00788263	0.224603	18.2087	-27.1933	MAPK1
CDK14	1	12	0.0103093	0.00264725	0.00766202	0.24089	19.1723	-27.2901	RB1
FGFR4	2	18	0.0206186	0.00397088	0.0166477	0.0646384	10.0001	-27.3898	STAT1;STAT3
EEF2K	2	16	0.0206186	0.00352967	0.0170889	0.0534657	9.58574	-28.0739	MAPK14;MAPKAPK2
TTK	2	14	0.0206186	0.00308846	0.0175301	0.0430776	9.20163	-28.9368	ABL1;TP53
DYRK1B	2	15	0.0206186	0.00330907	0.0173095	0.0481683	9.67493	-29.3446	MAPK14;MAPK1
CSNK1G2	2	15	0.0206186	0.00330907	0.0173095	0.0481683	9.73026	-29.5124	CTNNB1;TP53
BMX	3	14	0.0309278	0.00308846	0.0278394	0.00489775	5.59055	-29.736	STAT1;STAT3;TP53
BUB1B	2	14	0.0206186	0.00308846	0.0175301	0.0430776	9.60063	-30.1916	HDAC1;CDC20
EPHB1	1	13	0.0103093	0.00286786	0.00744142	0.256839	22.3652	-30.4012	STAT3
BUB1	2	14	0.0206186	0.00308846	0.0175301	0.0430776	9.9025	-31.1409	HDAC1;CDC20
DMPK	2	15	0.0206186	0.00330907	0.0173095	0.0481683	10.5236	-31.9185	SRF;SP1
MAP2K2	2	15	0.0206186	0.00330907	0.0173095	0.0481683	10.8265	-32.8375	MAPK1;MAPK3
SGK2	2	10	0.0206186	0.00220604	0.0184125	0.0250096	9.02076	-33.273	GSK3B;CREB1
STK3	1	10	0.0103093	0.00220604	0.00810323	0.20797	21.3104	-33.465	ABL1
PTK6	2	12	0.0206186	0.00264725	0.0179713	0.0335613	10.1484	-34.4476	AKT1;CTNNB1
DYRK2	1	13	0.0103093	0.00286786	0.00744142	0.256839	25.4814	-34.6371	TP53
CSNK1G3	2	11	0.0206186	0.00242665	0.0181919	0.0291588	10.2648	-36.2859	CTNNB1;TP53
STK39	1	9	0.0103093	0.00198544	0.00832384	0.190985	22.3514	-37.0041	MAPK14
MAP4K5	2	8	0.0206186	0.00176484	0.0188537	0.0175219	9.22747	-37.3187	GSK3B;ABL1
CAMKK1	2	11	0.0206186	0.00242665	0.0181919	0.0291588	10.5931	-37.4467	CAMK4;AKT1
PKN2	1	9	0.0103093	0.00198544	0.00832384	0.190985	22.7868	-37.7249	AKT1
CSNK1A1L	2	12	0.0206186	0.00264725	0.0179713	0.0335613	11.2627	-38.2301	CTNNB1;TP53
MAPKAPK3	2	9	0.0206186	0.00198544	0.0186331	0.0211263	10.1326	-39.0837	TCF3;MAPK14
MOS	2	9	0.0206186	0.00198544	0.0186331	0.0211263	10.1985	-39.3381	MYOD1;VIM
EPHA3	2	11	0.0206186	0.00242665	0.0181919	0.0291588	11.4215	-40.3752	STAT3;TP53
PIM2	1	9	0.0103093	0.00198544	0.00832384	0.190985	24.5234	-40.6001	MYC
HSPB8	2	12	0.0206186	0.00264725	0.0179713	0.0335613	12.0305	-40.8363	CSNK2A1;MAPK3
GAK	2	11	0.0206186	0.00242665	0.0181919	0.0291588	12.55	-44.3643	AR;CREBBP
VRK1	2	8	0.0206186	0.00176484	0.0188537	0.0175219	11.3053	-45.722	JUN;TP53
KSR1	1	8	0.0103093	0.00176484	0.00854444	0.173638	26.1178	-45.7266	MAPK1
HIPK1	2	8	0.0206186	0.00176484	0.0188537	0.0175219	11.5484	-46.7053	TP53;RUNX1
KSR2	2	5	0.0206186	0.00110302	0.0195155	0.00851859	10.8164	-51.5458	MAPK1;MAPK3
SMG1	1	8	0.0103093	0.00176484	0.00854444	0.173638	29.7332	-52.0564	TP53
MAPK15	2	7	0.0206186	0.00154423	0.0190743	0.0142098	12.3853	-52.685	JUN;NR3C1
PRKD3	1	7	0.0103093	0.00154423	0.00876505	0.155924	29.2122	-54.2875	GSK3A
CAMKK2	2	6	0.0206186	0.00132363	0.0192949	0.0112039	12.1947	-54.7723	CAMK4;AKT1
BRD2	1	7	0.0103093	0.00154423	0.00876505	0.155924	32.5176	-60.4303	RB1
MAP4K3	1	5	0.0103093	0.00110302	0.00920626	0.11936	28.9815	-61.6033	MAPK14
CLK4	1	5	0.0103093	0.00110302	0.00920626	0.11936	29.1325	-61.9243	ABL1
FRK	1	5	0.0103093	0.00110302	0.00920626	0.11936	32.5304	-69.147	RB1
TSSK4	1	3	0.0103093	0.000661813	0.00964746	0.0812299	28.9487	-72.675	CREB1
CAMK1D	1	4	0.0103093	0.000882418	0.00942686	0.100495	32.1305	-73.8246	EP300
PAK6	2	3	0.0206186	0.000661813	0.0199567	0.00416918	15.6758	-85.9037	AR;ESR1
VRK2	1	5	0.0103093	0.00110302	0.00920626	0.11936	41.3963	-87.9922	TP53
TP53RK	1	4	0.0103093	0.000882418	0.00942686	0.100495	38.5087	-88.4793	TP53
DYRK3	1	4	0.0103093	0.000882418	0.00942686	0.100495	39.7262	-91.2768	CREB1
MOK	2	3	0.0206186	0.000661813	0.0199567	0.00416918	17.8819	-97.9934	JUN;MYC
MAP3K6	1	4	0.0103093	0.000882418	0.00942686	0.100495	44.2991	-101.784	MAPK14
CAMK1G	1	3	0.0103093	0.000661813	0.00964746	0.0812299	41.6711	-104.614	EP300
SNRK	2	3	0.0206186	0.000661813	0.0199567	0.00416918	19.626	-107.551	JUN;NFATC2
RNASEL	1	3	0.0103093	0.000661813	0.00964746	0.0812299	55.348	-138.95	AR
PASK	1	3	0.0103093	0.000661813	0.00964746	0.0812299	60.492	-151.863	PDX1
PIKFYVE	1	2	0.0103093	0.000441209	0.00986807	0.0615564	74.1938	-206.838	AKT1
STK17A	1	2	0.0103093	0.000441209	0.00986807	0.0615564	74.801	-208.53	TP53
RPS6KA6	1	1	0.0103093	0.000220604	0.0100887	0.0414662	106.42	-338.72	NR4A1

## Sheet: SuppData3 E2K blue.results_tf.c
TF	Target/Input	Targets/Database	Fraction/Input	Fraction/Database	Difference	P-value	Z-score	Combined Score	Genes
CREM-20920259	710	5776	0.454255	0.137318	0.316937	1.71542e-191	-0.708933	311.402	ITSN2;JRK;IFT172;PTPDC1;FAM110A;ALKBH5;PRKACA;PRKACB;CLOCK;SET;ZC3HAV1;CREBBP;BTBD11;LARP4;PPFIBP1;STRN;JAK2;DUSP3;RING1;TEX10;PAFAH1B2;PAFAH1B1;SDAD1;SNX27;RICTOR;SNX18;SNX16;CIAPIN1;GZF1;ZFP446;SLK;NEK1;ZFP458;FBXO18;FAM118A;FBXO11;PIAS1;ZFP451;NPAS3;IP6K1;API5;BICD2;TRIM62;BMP2K;SMCR8;SRF;ZFP426;MLLT3;ARL13B;CNBP;TRIM37;TRIM33;RCBTB1;TRIM28;BCS1L;ZBTB1;ZFP507;TTBK1;XBP1;FBXL3;FBXL5;MON1B;ACTR1…
KDM5B-21448134	457	3724	0.292386	0.0885339	0.203853	1.21063e-111	-0.918064	234.47	ITSN2;ALKBH5;DPYSL2;PRKACA;SET;HLCS;CREBBP;LARP4;PPFIBP1;TEX10;PAFAH1B1;SDAD1;RICTOR;CIAPIN1;ZFP445;NEK1;FBXO18;FBXO11;SRCIN1;EIF2S3X;ZKSCAN1;API5;FBXO32;SMCR8;BCAT1;ZFP423;MLLT6;CNBP;TRIM37;TRIM33;PEG10;TRIM25;LIMCH1;GOLPH3L;ZFP507;MED12L;XBP1;POLA1;FBXL3;FBXL5;MON1B;AP4E1;ZHX2;GAB1;PRPF40A;ATPAF1;MAP3K3;GAD2;ETAA1;PRDM2;PCID2;FBXW11;UBA6;AHI1;PCTP;TNFAIP1;MYSM1;PITPNC1;TTC28;CYP26B1;MYBL1;ETV5;…
HNF4A-19822575	652	6083	0.417147	0.144616	0.27253	2.65392e-143	-0.691319	226.956	JRK;IFT172;DPYSL5;DPYSL2;BBX;FNBP1;BCR;CLOCK;ZC3HAV1;HLCS;BTBD11;LARP4;PPFIBP1;STRN;SFXN5;DUSP3;CRYAB;PAFAH1B1;SNX30;SDAD1;STX3;SNX16;CIAPIN1;NEK3;FAM118A;FBXO11;PIAS1;FBXO41;NPAS2;ZKSCAN1;NEK4;LRCH3;BCAR3;BICD1;BMP2K;BCAT1;PRKAA2;SRC;MLLT3;MLLT6;GPKOW;TRIM35;TRIM37;TRIM33;RCBTB1;TRIM25;LGALS8;GOLPH3L;TTBK1;MED12L;NEU3;KCNN3;XBP1;POLA1;ACTR1A;SUFU;ZHX2;GAB1;PRPF40A;GAB2;TOX3;KLHL5;DENND5B;ENPP1;P…
CREB1-20920259	375	3057	0.239923	0.0726767	0.167247	3.56886e-89	-1.01079	205.855	IFT172;TESK1;PTPDC1;ALKBH5;DPYSL5;PRKACA;PRKACB;BCR;FAR1;LARP4;DLGAP3;DLGAP2;DLGAP4;DUSP3;RING1;PAFAH1B1;2010300C02RIK;NEURL1A;ZSWIM6;SNX16;ETNK1;TAOK2;CENPN;CIAPIN1;CENPQ;NEK1;FBXO18;FAM118A;ACLY;ZFP451;G3BP1;NEK7;HPS5;CORO2A;FBXO32;BICD2;BMP2K;SRC;MGRN1;ZFP426;GTPBP10;KCTD20;CNBP;ZFP354C;CRKL;TBC1D22A;CCDC93;SMARCC1;CSNK1E;BCS1L;GSPT1;STAT5A;STAT5B;EGR1;XBP1;EGR3;CSRNP2;ACTR1A;ACTR1B;SUFU;ZHX2;…
MITF-21258399	602	5578	0.385157	0.132611	0.252546	8.59343e-131	-0.674287	201.941	ITSN2;PTPDC1;DPYSL5;DPYSL2;BBX;PRKACB;FNBP1;DHDH;BCR;SET;ZC3HAV1;HLCS;LARP4;PPFIBP1;NHSL2;JAK2;DUSP3;TEX10;DUSP8;SDAD1;SNX30;SNX27;RICTOR;STX3;SNX18;SNX16;GZF1;MTCH1;SLK;FBXO18;FAM118A;SRCIN1;FBXO11;NPAS2;NPAS3;ZKSCAN1;RASL10B;FBXO32;LRCH3;BCAR3;BICD2;UNC80;AP4M1;TRIM62;SMCR8;TRIM56;SRC;MLLT3;TRIM37;TRIM33;RCBTB1;TRIM25;LIMCH1;NEU3;KCNN3;POLA1;FBXL5;ACTR1B;GAB1;GAB2;ARHGEF9;ARHGEF7;SGSM1;KLHL5;MA…
EGR1-20690147	591	6207	0.378119	0.147564	0.230555	1.41723e-105	-0.827721	199.831	PRKACA;DHDH;BCR;SET;STRN;SFXN5;RICTOR;STX3;MTCH1;FBXO11;PIAS1;NPAS2;NPAS3;RASL10B;BCAR3;BICD1;BICD2;BMP2K;PRKAA2;SRC;SRF;MLLT6;GRB7;KCNN3;FBXL3;FBXL5;SUFU;ZHX2;GAB1;GAB2;KLHL5;KCNS2;INPPL1;GFOD1;SHANK2;PRKCI;PRKCD;CDKN1A;RARG;CIC;ASH1L;EXOC3;MAP2K7;SYNJ2;BCL2;ZC3H3;HDAC4;TULP4;TTL;KBTBD11;RPS6KA5;RPS6KA2;SYNPO;FAM43B;ZYG11B;TYMS;NUPL1;SIPA1;RSBN1;UBC;LONRF3;MYRIP;RBL2;DDN;PDE10A;HPCAL1;HPCAL4;PRK…
FOXA2-19822575	362	2968	0.231606	0.0705608	0.161045	4.05332e-85	-0.948758	184.363	IFT172;NDST1;AKT3;BBX;BCR;ZC3HAV1;HLCS;EPB41L1;BTBD11;NR2F2;PPFIBP1;FASN;STRN;SFXN5;ARHGAP1;ARHGAP5;DLGAP4;DUSP3;SNX30;SNX27;STX3;ZSWIM5;SNX16;GZF1;ACLY;FBXO41;NPAS3;ZKSCAN1;NADK;LRCH3;BCAR3;DDI2;ROCK2;SRC;SRF;MLLT3;EHBP1;FEM1B;MYO1D;TRIM33;CCDC102A;RCBTB1;CDC27;LGALS8;TBC1D22A;CCDC93;RIN1;TTBK1;XBP1;AKAP13;SUFU;CAP1;GAB1;GAB2;TOX3;CAB39;GNAI1;EPS15;KLHL5;DENND5B;ENPP1;TBC1D16;AUTS2;DENND4B;GNAO1…
PPARG-20887899	403	3565	0.257837	0.0847538	0.173084	9.89653e-87	-0.919956	182.181	PTPDC1;ALKBH5;BBX;ADAMTS15;SNX30;SDAD1;EGLN3;SNX18;SNX16;ZFP449;FBXO11;ZFP462;API5;NEK7;LRCH3;BCAR3;BICD1;BICD2;AP4M1;BMP2K;SMCR8;ZFP423;CNBP;A830018L16RIK;RCBTB1;TRIM25;BCS1L;XBP1;ZFP516;RAB7;ACTR1A;SUFU;PRPF40A;PEX19;MAP3K1;KLHL5;PRDM2;DENND4B;TTC26;TNFAIP8;CYP26B1;MYBL1;MKL2;TTC33;GFOD1;MTA2;TBX18;ERCC4;PRKCI;AFAP1;QTRTD1;HCFC1;DAAM1;PARD3;BLOC1S3;ZSCAN12;SMG1;CDKN1A;SMG7;LYST;UBL3;SPTY2D1;ADC…
WT1-20215353	219	1663	0.140115	0.0395359	0.100579	9.81492e-55	-1.44449	179.635	TESK1;DPYSL5;RAVER2;BBX;PRKACA;CLOCK;SKAP2;ADAMTS15;PIP5K1C;NR2F2;LARP6;PPFIBP1;FASN;DLGAP3;PGM2L1;SAMD4;NPAS2;RASL10B;FBXO32;BCAR3;ACP6;SNAP29;TRIM62;BMP2K;BCAT1;SRC;SRF;MLLT3;EHBP1;MLLT6;BAHD1;FEM1B;TRIM33;CCDC102A;RCBTB1;SMARCC1;ZBTB1;GSPT1;EGR1;EGR3;ZHX2;GAB1;ZADH2;ARHGEF7;GNAI1;NFIL3;EPS15;MAP3K1;PEX19;GAD2;SH3RF2;KCNS2;INPPL1;ACTG1;ENPP1;TBC1D16;TJAP1;GNB4;PITPNC1;ETV5;ELF1;CRY2;ADD3;PRKCI;…
AR-19668381	366	3519	0.234165	0.0836602	0.150505	5.54852e-69	-1.07459	168.887	ITSN2;PTPDC1;DPYSL5;DPYSL2;BBX;DHDH;ZC3HAV1;ADAMTS15;HLCS;CREBBP;STRN;RICTOR;SHKBP1;FAM118A;NPAS2;NPAS3;ZKSCAN1;MLLT3;ARL13B;TRIM35;TRIM33;TRIM25;TTBK1;POLA1;SUFU;GAB1;ATPAF1;GAD2;INPPL1;FBXW11;AUTS2;PCTP;PITPNC1;FYCO1;CYP26B1;MKL2;SHROOM2;GFOD1;WARS2;FRMPD4;PARD3;HOMER1;SMG7;UBL3;CDYL2;EXOC3;RARB;WDR26;FGD1;FAM49A;FGF1;RIMS1;RIMS4;USP8;MAP2K7;MCL1;UVRAG;OSBPL3;BCL2;BCL2L1;SYNE1;PHACTR2;PRKG2;TNP…
SOX2-18692474	327	3319	0.209213	0.0789055	0.130308	5.93941e-56	-1.1824	150.358	IFT172;FNBP1;SET;ZC3HAV1;GSTM3;BTBD11;TOMM40L;PAFAH1B1;SNX27;STX3;EGLN3;SHKBP1;GZF1;NPAS3;ZKSCAN1;ZFP462;RASL10B;HTR1D;FBXO32;TRIM62;SMCR8;BCAT1;SRC;MLLT6;ARL13B;GPKOW;TRIM28;PEG10;TRIM25;GOLPH3L;BCS1L;ZBTB1;FBXL3;RAB7;ACTR1B;GAD2;APTX;ETAA1;KLHL5;INPPL1;DAPP1;5730559C18RIK;PITPNC1;MYBL1;ETV5;GFOD1;2510009E07RIK;SMUG1;ERCC6;PRKCI;WDR78;WDR76;BLOC1S3;RARG;SMG7;UBL3;CIC;FGD1;FGD4;USP1;1700102P08RIK…
PRDM14-21183938	239	1944	0.152911	0.0462164	0.106695	4.86127e-55	-1.15082	143.923	PTPDC1;FAM110A;FNBP1;SKAP2;PIP5K1C;BTBD11;LARP4;VANGL1;STRN;NHSL2;MED14;TIFAB;DLGAP3;DLGAP4;PAFAH1B1;DAB2IP;SNX16;ETNK1;CRAT;FAM118A;PIAS1;KHDRBS1;BCAR3;TRIM62;ZFP423;SRC;ROCK2;MLLT6;FEM1B;A830018L16RIK;GM13034;PEG10;TRIM25;LGALS8;LIMCH1;CSNK1E;RIN1;TRIB2;ZBTB1;MED12L;TTBK1;BBS1;XBP1;ZFP516;SUFU;GAB1;PRICKLE2;ETAA1;KLHL5;KCNS2;DAPP1;TBC1D13;AUTS2;FAM199X;TJAP1;GNB4;UBE2O;AMOTL2;ADAR;PITPNC1;CYP26…
REST-21632747	235	2339	0.150352	0.0556071	0.0947448	1.38988e-40	-1.42113	130.423	ITSN2;JRK;DPYSL5;BBX;NR2F2;SFXN5;ARHGAP5;DLGAP3;DLGAP2;DLGAP4;SNX33;ZSWIM6;ZSWIM5;EGLN3;ETNK1;TAOK2;SRCIN1;SHC3;KHDRBS3;FBXO41;NPAS3;G3BP1;NADK;NEK4;API5;UNC80;BCAT1;TRIM56;ZFP423;SRF;SYT17;TTC39B;MYO1D;A830018L16RIK;TRIM33;TBC1D22A;MON1B;RAB7;TOX3;GAD2;PNMA2;SGSM1;SH3RF3;KCNS2;PEBP1;PRDM2;TBC1D30;FBXW11;ACOT11;SYT9;GNAO1;AHI1;CYP26B1;RASGEF1A;DACT3;NAV2;CRY2;CRY1;SHANK2;NWD1;CLVS1;WARS2;ERCC4;ER…
YAP1-20516196	264	2329	0.168906	0.0553693	0.113537	7.83661e-55	-1.02977	128.292	NDST1;DPYSL5;DPYSL3;RAVER2;PRKACA;BCR;SKAP2;HLCS;CREBBP;BTBD11;NR2F2;VANGL1;PPFIBP1;SFXN5;DLGAP2;MED26;PAFAH1B1;SDAD1;SAMD4;SNX18;SNX16;NUDT12;FBXO11;PIAS1;ACLY;NPAS3;ZFP462;API5;IBTK;BCAR3;NUMA1;BICD1;CDC73;IMPACT;ZFP423;MLLT6;MYO1D;TRIM37;TRIM33;LIMCH1;ZFP507;GSPT1;XBP1;ZFP516;AKAP13;ZHX2;GAB1;TOX3;ARHGEF7;GNAI1;NFIL3;EPS15;ETAA1;UBE2Z;ENPP1;CAST;FBXW11;ACOT11;AUTS2;GNB1;RERE;ADAR;PITPNC1;MKL2;…
KLF4-18555785	266	2444	0.170186	0.0581033	0.112082	3.57648e-52	-1.07435	127.268	ALKBH5;DPYSL2;RAVER2;PRKACA;FNBP1;BCR;SKAP2;SET;CRABP1;LARP6;PPFIBP1;STRN;JAK2;DLGAP4;TEX10;PGM2L1;SDAD1;CENPQ;ACLY;KHDRBS1;NEK7;HPS5;ZFP408;DDI2;SNAP29;TRIM56;ROCK2;MLLT6;KCTD20;EIF4H;CNBP;TRIM35;RCBTB1;TRIM28;CDC27;TRIM25;LGALS8;SMARCC1;BCS1L;XBP1;FBXL3;CAB39;EPS15;TCEA1;GDA;INPPL1;PRDM2;UBE2Z;CAST;TBC1D24;VCPIP1;TBC1D13;GNAO1;AHI1;UBE2N;UBE2O;AMOTL2;TNFAIP1;MYBL1;TTC33;ELF1;GFOD1;CRY2;GNB1L;TR…
TRIM28-19339689	305	3072	0.195138	0.0730333	0.122104	1.63584e-52	-1.03973	123.98	ALKBH5;DPYSL2;CLOCK;LARP6;STRN;DUSP3;RING1;SNX30;CIAPIN1;ZFP445;ZFP451;API5;RASL10B;NEK7;BCAR3;BICD2;ZFP423;PRKAA2;ARL13B;CNBP;A830018L16RIK;TRIM33;RCBTB1;GRB7;ZBTB1;SLC10A4;XBP1;ACTR1B;GAB1;ATPAF1;MAP3K1;GAD2;KCNS2;PCID2;FBXW11;AHI1;5730559C18RIK;ELF1;2510009E07RIK;TROVE2;BNIP2;MTA2;TBX18;WARS2;GPD1L;PARD3;NUP98;BLOC1S3;RRS1;HOMER1;EXOC8;WDR26;PPP1R2;FGD6;RPS15A;USP1;ZFP398;IPO9;ZFP334;IPMK;TPR;…
EP300-20729851	211	2093	0.134997	0.0497587	0.0852381	1.67504e-36	-1.4559	119.933	NDST1;DPYSL3;AKT3;FNBP1;BCR;CREBBP;NR2F2;PPFIBP1;FASN;DUSP3;RING1;PGM2L1;DLST;SAMD4;DAB2IP;SLA;SLK;FBXO11;SHC4;SHC3;NPAS3;NADK;ZFP462;IBTK;ZFP423;ROCK2;MLLT3;EHBP1;MLLT6;FEM1B;CNBP;MYO1H;ZBTB1;STAT5B;EGR1;GAB2;ZADH2;NAPG;NFIL3;SGSM1;INPPL1;POU3F4;WDFY4;AUTS2;TJAP1;MKRN3;AMOTL2;PITPNC1;TTC28;FYCO1;CYP26B1;DACT3;NAV1;ELF1;NWD1;DAAM1;AFAP1L1;SETD1B;NFATC1;KITL;PHF2;RARG;SMG7;CIC;RARB;GRAMD1B;WDR26;A…
GATA1-21571218	286	2601	0.182981	0.0618358	0.121146	3.35745e-57	-0.889428	115.658	IFT172;FAM110A;NDST1;DPYSL2;DPYSL3;FNBP1;BCR;RNF219;PIP5K1C;STRN;SFXN5;TIFAB;DUSP3;SNX33;ZSWIM6;EGLN3;DAB2IP;FBXO18;FAM118A;FBXO11;KHDRBS1;SHC3;BCAR3;BICD1;UNC80;TRIM62;SRC;MLLT3;KCTD20;TTC39B;MYO1D;SMARCC1;KCTD16;MED12L;NEU3;KCNN3;SLC10A4;STAT5A;EGR1;EGR3;RANBP10;CAP1;GAB1;ARHGEF6;EPS15;MAP3K3;NR3C1;PCID2;ACOT11;TBC1D24;VCPIP1;TBC1D13;AHI1;GNAQ;UBE2O;RERE;TNFAIP8;PITPNC1;TTC33;NAV2;ELF1;GFOD1;GN…
TCFAP2C-20176728	271	2667	0.173385	0.0634049	0.10998	5.45031e-48	-1.05507	114.822	GMFG;FNBP1;STRN;SFXN5;CHAF1A;SPHK2;DUSP8;STX3;SAMD4;DAB2IP;GZF1;MTCH1;SLK;NEK3;FBXO18;ZFP451;G3BP2;ZKSCAN1;NEK9;API5;BCAR3;CDC73;SNAP29;BMP2K;MGRN1;ROCK2;SRC;SRF;GTPBP10;MLLT6;ARL13B;BAHD1;CNBP;SYT17;TRIM33;TRIM25;ACTN2;CSNK1E;KCTD10;GRB7;GSPT1;STAT5A;XBP1;EGR3;FBXL3;RAB7;ACY1;ACTR1A;CAP1;GAB2;ZADH2;NAPG;NFIL3;MAP3K3;MAP3K1;INPPL1;PEBP1;UBE2Z;ACTG1;DENND4B;TJAP1;UEVLD;GNAQ;UBE2O;TTC26;TNFAIP1;PIT…
E2F4-21247883	312	2998	0.199616	0.071274	0.128342	6.3616e-58	-0.863118	113.672	ALKBH5;RAVER2;PRKACB;FAR1;TARSL2;RNF219;RNF214;RHOT2;CREBBP;BTBD11;NR2F2;VANGL1;PGM2L1;PAFAH1B2;PAFAH1B1;DLST;SNX27;EGLN3;ETNK1;TAOK2;TSR1;CENPN;SLK;NEK3;FBXO18;PIAS1;KHDRBS1;NADK;NEK9;API5;HPS5;BCAR3;NUMA1;BICD1;CDC73;DDI2;UNKL;SMCR8;MGRN1;FEM1B;TRIM33;RCBTB1;ZBTB1;GSPT1;RANBP10;FBXL3;MON1B;SYNM;AP4E1;AKAP13;ACTR1A;SUFU;CAP1;GAB2;ARHGEF7;ATPAF1;PEX19;PEBP1;PRDM2;PCID2;QSER1;UEVLD;GNB1;UBE2N;RERE…
ZFX-18555785	315	3249	0.201536	0.0772413	0.124294	2.51665e-52	-0.921465	109.481	ITSN2;ALKBH5;BBX;FNBP1;DHDH;SET;TARSL2;ZC3HAV1;CREBBP;TEX10;PAFAH1B2;PAFAH1B1;SDAD1;SNX27;STX3;CIAPIN1;PIAS1;LENG1;FBXO41;ZKSCAN1;NEK9;NEK4;API5;NEK7;LRCH3;BICD1;BICD2;ZFP423;SRC;SRF;CNBP;TRIM35;TRIM33;RCBTB1;TRIM28;TRIM25;ZBTB1;FBXL3;RAB7;ACTR1A;SUFU;GAB1;PRPF40A;ZFP11;MAP3K3;ETAA1;DENND4C;MYBL1;TTC33;ETV5;GFOD1;BNIP2;MTA2;ERCC4;GPD1L;NUP98;PI4K2A;UBL3;WDR37;RPS15A;HIPK1;ZFP398;PPP1CB;1700102P08…
POU5F1-18692474	373	4233	0.238644	0.100635	0.138009	2.10429e-53	-0.89871	109.007	IFT172;PRKACB;FNBP1;SET;ZC3HAV1;GSTM3;TOMM40L;CRYAB;PAFAH1B1;STX3;EGLN3;SNX16;SHKBP1;GZF1;MTCH1;ZFP451;NPAS3;ZKSCAN1;ZFP462;NEK9;FBXO32;LRCH3;BCAR3;ZFP408;TRIM62;BCAT1;SRC;MLLT6;TRIM33;TRIM28;PEG10;TRIM25;BCS1L;NEU3;KCNN3;FBXL3;FBXL5;RAB7;GAD2;ETAA1;KLHL5;INPPL1;PCID2;FBXW11;DAPP1;MKRN3;5730559C18RIK;PITPNC1;CYP26B1;MYBL1;ETV5;GFOD1;2510009E07RIK;NWD1;BNIP2;MTA2;PRKCI;QTRTD1;WDR78;HOMER1;CDKN1A;R…
RUNX1-21571218	494	5071	0.316059	0.120557	0.195502	5.84155e-88	-0.542647	108.997	PTPDC1;DPYSL2;PRKACA;FNBP1;BCR;ZC3HAV1;BTBD11;LARP4;SFXN5;NHSL2;TEX10;SNX30;SNX27;RICTOR;STX3;CIAPIN1;GZF1;SLA;NEK3;FBXO18;FAM118A;FBXO11;ZKSCAN1;API5;HTR1D;NEK7;FBXO32;BICD2;AP4M1;BMP2K;BCAT1;TRIM56;SRC;MLLT3;MLLT6;GPKOW;TRIM35;TRIM25;BCS1L;RIN1;GRB7;ZBTB1;MED12L;KCNN3;XBP1;FBXL5;ACTR1A;ZHX2;PCID2;FBXW11;AUTS2;DENND4B;MKRN3;TTC26;PITPNC1;FYCO1;TTC33;SHROOM2;ETV5;ELF1;BNIP2;MTA2;CLVS1;FAM122A;PRK…
SOX2-21211035	325	3420	0.207933	0.0813066	0.126627	2.30391e-52	-0.865258	102.879	ITSN2;PTPDC1;DPYSL5;BCR;ADAMTS15;HLCS;CREBBP;BTBD11;LARP4;SFXN5;PAFAH1B1;SDAD1;EGLN3;SNX16;SLA;RINT1;NPAS3;API5;TRIM62;BMP2K;BCAT1;MLLT3;ZBTB1;MED12L;KCNN3;XBP1;POLA1;FBXL3;ACTR1A;ACTR1B;ZHX2;GAB1;GAB2;MAP3K3;PRDM2;ENPP1;FBXW11;AUTS2;DENND4C;TTC26;FYCO1;CYP26B1;ETV5;SHANK2;SMUG1;ERCC4;WDR78;DAAM1;RRS1;CHM;ASH1L;CDYL2;WDR26;FGD4;FGD5;SNCAIP;FAM49A;FGF1;IPO8;IPO9;USP8;IPMK;MAP2K7;OSBPL6;BCL2;MAP3K1…
TAL1-20566737	213	1875	0.136276	0.044576	0.0917004	5.9474e-44	-1.00819	100.346	FAM110A;PRKACA;ZC3HAV1;LARP4;LIN54;DLGAP4;DUSP8;PGM2L1;ZSWIM6;EGLN3;DAB2IP;SLA;FBXO18;FBXO11;G3BP1;UNKL;BMP2K;TRIM56;BAHD1;FEM1C;TRIM25;SMARCC1;KCTD10;TRIB2;ZBTB1;KCNN3;EGR1;ZFP516;MON1B;CAB39;MAP3K3;GDA;ACTG1;TBC1D24;DAPP1;AHI1;RERE;TNFAIP8;PITPNC1;CYP26B1;NAV2;CRY2;ASAP1;ADD3;MTA2;FAM122A;GTPBP1;WDR76;ARMC2;DAAM1;HECW1;HOMER1;NR1D2;HNRNPF;PHF2;LYST;CEP68;KAT2B;KAT2A;PLEKHO2;WDR26;SPTY2D1;FGD6;F…
MYCN-18555785	230	2261	0.147153	0.0537527	0.0934002	1.82289e-40	-1.0088	92.3078	JRK;POP1;ALKBH5;DPYSL2;PRKACA;CLOCK;SET;JAK2;DLGAP4;RING1;PGM2L1;ZSWIM5;CIAPIN1;CENPQ;CRAT;GZF1;ZFP451;KHDRBS1;G3BP2;EIF2S3X;NEK4;HPS5;CDC73;AP4M1;SMCR8;KCTD20;EIF4H;RCBTB1;CRKL;TRIM25;TBC1D22A;ZBTB1;XBP1;FBXL5;RAB7;ARHGEF7;NAPG;MAP3K1;ETAA1;AMMECR1L;TBC1D24;GNAO1;AHI1;GNB1;UBE2N;ADAR;TNFAIP1;PITPNC1;ELF1;CRY2;CRY1;RNF4;TROVE2;ERCC6;GPD1L;GTPBP6;FNDC3B;QTRTD1;HCFC1;DAAM1;BLOC1S3;RARG;LYST;PHF8;UB…
ZFP281-18757296	208	2004	0.133077	0.0476428	0.0854346	1.26164e-37	-1.0771	91.5143	GMFG;ALKBH5;DPYSL5;DPYSL2;PRKACA;SET;BTBD11;VANGL1;PPFIBP1;FASN;STRN;DLGAP3;DLGAP4;DUSP8;PAFAH1B1;SHKBP1;ZFP446;MTCH1;PIAS1;ACLY;SHC4;KHDRBS1;HPS5;ACP6;SNAP29;TRIM56;SRC;SRF;MLLT6;TRIM35;TRIM33;CCDC102A;CRKL;TRIM28;OPHN1;PEG10;TRIM25;RIN1;GRB7;EGR1;EGR3;FBXL5;ACTR1B;GAB1;PRPF40A;SYN1;REM2;MAP3K1;INPPL1;FBXW11;TBC1D13;GNB1;5730559C18RIK;PITPNC1;ETV5;ELF1;GFOD1;GPD1L;GTPBP6;SETD1B;NFATC1;ADI1;CDKN1…
FLI1-21571218	538	5834	0.34421	0.138697	0.205513	5.14714e-89	-0.424231	86.2427	IFT172;PTPDC1;FAM110A;DPYSL2;FNBP1;ZC3HAV1;HLCS;STRN;JAK2;DUSP3;TEX10;TOMM40L;PAFAH1B2;SNX30;SDAD1;SNX27;RICTOR;CIAPIN1;GZF1;SLA;NEK3;FBXO18;LENG1;RINT1;ZC4H2;ZKSCAN1;NEK4;FBXO32;TRIM62;BMP2K;SRC;CNBP;TRIM35;TRIM25;ZBTB1;KCNN3;XBP1;POLA1;FBXL5;MON1B;AP4E1;GAB1;ARHGEF7;ATPAF1;PRICKLE2;MAP3K3;MAP3K1;APTX;PRDM2;FBXW11;ACOT11;AUTS2;DENND4B;PCTP;TTC28;MYBL1;SHROOM2;ETV5;ELF1;GFOD1;SHANK2;BNIP2;MTA2;SM…
MYB-21317192	131	923	0.0838132	0.0219433	0.0618699	1.61286e-35	-1.07313	85.971	FAM110A;PREX1;HPCAL1;BCR;SET;HSPH1;PPFIBP1;PSMG1;EEA1;JAK2;MED26;EGLN3;DAB2IP;CIAPIN1;GZF1;ACLY;SQSTM1;BCL2L13;G3BP1;MBP;NADK;STK24;SCHIP1;LRRK2;ARRB1;PIK3CB;PPP1R12A;BMP2K;GTF3C4;PPM1H;ZBTB44;CDC37L1;TTC39B;MYO1D;SLC25A37;PTPN6;AHCYL2;PLEKHB2;LGALS8;TBC1D22A;CSNK1E;SPATA13;ULK2;EVPL;SNX9;RAB11FIP5;XBP1;IRGM2;ANLN;RGL1;NDEL1;CAP1;NEDD9;NFIL3;MAP3K3;PLEKHA2;ITCH;DCLRE1B;FHOD1;PRDM2;AMMECR1L;TCF7;R…
SUZ12-20075857	411	4356	0.262956	0.103559	0.159397	2.7894e-67	-0.543653	83.3134	IFT172;PTPDC1;DPYSL5;DPYSL2;DPYSL3;BBX;BCR;TARSL2;ZC3HAV1;ADAMTS15;BTBD11;LARP6;SFXN5;NHSL2;JAK2;DUSP8;CRYAB;KCNA5;SNX33;STX3;EGLN3;SNX18;NPAS2;NPAS3;RASL10B;HTR1D;HTR1B;FBXO32;BCAR3;UNC80;TRIM62;BMP2K;ZFP423;SRF;A830018L16RIK;PEG10;LIMCH1;RIN1;MED12L;TTBK1;SLC10A4;FBXL3;ZHX2;GAB1;GAB2;TOX3;ARHGEF7;PRICKLE2;GAD2;KCNS2;MAMLD1;DENND5B;ENPP1;AUTS2;TNFAIP8;CYP26B1;GFOD1;SHANK2;2510009E07RIK;TROVE2;TB…
GATA1-19941827	201	1834	0.128599	0.0436013	0.0849976	2.27628e-39	-0.931419	82.8761	ITSN2;NDST1;DPYSL5;BCR;ZC3HAV1;HLCS;VANGL1;SFXN5;JAK2;DLGAP4;DUSP8;SNX30;SLA;FBXO11;KHDRBS3;BMP2K;SMCR8;MGRN1;ZFP426;FEM1C;TBC1D22A;GOLPH3L;CSNK1E;KCTD10;KCNN3;RANBP10;AKAP13;SUFU;GAB1;GAB2;ARHGEF7;MAP3K3;MAP3K1;TBC1D24;DAPP1;AHI1;GNAQ;TNFAIP1;PITPNC1;NAV2;ELF1;GFOD1;OTUB2;ADD3;BNIP2;CDK5RAP2;PRKCI;DAAM1;PARD3;NFATC1;UBL3;CEP68;WDR37;PLEKHO2;SPTY2D1;ADCY6;FGD5;HIPK1;WDR13;MAGI3;FRMD4A;RAB5C;SRGAP…
TBX5-21415370	221	2296	0.141395	0.0545848	0.08681	1.55984e-35	-1.01907	81.674	NDST1;ALKBH5;FNBP1;DHDH;CRABP1;ADAMTS15;LARP4;PPFIBP1;FASN;CHAF1A;DLGAP4;CRYAB;SDAD1;SAMD4;CIAPIN1;CENPQ;ZFP451;NADK;NEK9;API5;BICD1;DDI2;ACP6;IMPACT;ADORA2A;BMP2K;TRIM56;MGRN1;SRC;MLLT3;ARL13B;MYO1D;TRIM35;RCBTB1;TRIM25;TBC1D22A;SMARCC1;ACTN2;CSNK1E;KCTD10;RIN1;GSPT1;MON1B;SUFU;ZFP11;MAP3K3;PEX19;ETAA1;TCEA1;NR3C1;DAPP1;TJAP1;UEVLD;GNB4;TNFAIP8;TNFAIP1;MYSM1;PITPNC1;CYP26B1;SHANK2;OTUB2;ADD3;NWD…
POU5F1-18347094	212	2109	0.135637	0.0501391	0.0854975	1.63128e-36	-0.983586	81.0511	DPYSL5;DPYSL2;SET;ZC3HAV1;FASN;ARHGAP5;CHAF1A;DLGAP3;DUSP3;TOMM40L;DLST;EGLN3;DAB2IP;GZF1;PIAS1;KHDRBS1;NPAS3;ZFP462;HTR1B;IBTK;BCAR3;ACP6;TRIM62;BCAT1;PRKAA2;ROCK2;SRC;MLLT6;FEM1B;RCBTB1;PEG10;CSNK1E;TRIB2;ZBTB1;GAD2;KLHL5;TCEA1;INPPL1;PRDM2;CAST;TBC1D24;TCF7;TBC1D13;UBE2O;TTC26;TNFAIP8;5730559C18RIK;PITPNC1;MYBL1;ETV5;EPN2;2510009E07RIK;GTPBP1;PARD3;ADI1;RARG;SMG7;UBL3;TEAD1;TRP53INP2;GRAMD1B;F…
RCOR3-21632747	277	2851	0.177223	0.0677793	0.109444	1.0134e-45	-0.729958	75.6259	ITSN2;ALKBH5;BBX;DHDH;CREBBP;BTBD11;VANGL1;ARHGAP5;DLGAP3;DLGAP2;DLGAP4;DUSP3;NEURL1A;EGLN3;SNX18;SNX16;ETNK1;MTCH1;KHDRBS1;GMPS;ACP6;TRIM56;SRC;MLLT6;KCTD20;EIF4H;TTC39B;MYO1D;ZFP354C;MYO1H;PEG10;TRIM25;ACTN2;CSNK1E;RIN1;KCNN3;STAT5A;BBS1;XBP1;AP4E1;AKAP13;GNAI1;GAD2;SGSM1;SH3RF3;KCNS2;DENND5B;PEBP1;PRDM2;ACTG1;TBC1D30;FBXW11;TCF7;AUTS2;SYT9;GNB4;PITPNC1;DACT3;NAV1;NAV2;GFOD1;CRY1;SHANK2;CLVS1;O…
TCF3-18347094	218	2221	0.139475	0.0528017	0.0866736	3.56392e-36	-0.894605	73.0196	NDST1;PRKACB;FNBP1;DHDH;SET;ZC3HAV1;NR2F2;VANGL1;MED19;DLGAP3;DLGAP2;TOMM40L;EGLN3;DAB2IP;SNX16;GZF1;SHC4;KHDRBS1;SHC3;HTR1B;BCAR3;ACP6;TRIM62;SMCR8;BCAT1;MGRN1;SRC;MLLT3;MLLT6;ARL13B;GPKOW;FEM1B;TRIM28;PEG10;TRIM25;CSNK1E;BCS1L;TRIB2;ZBTB1;ATP6V1C2;RANBP10;ACTR1A;SUFU;GNAI1;GAD2;TTC7;KLHL5;TCEA1;INPPL1;CAST;TCF7;TBC1D13;AMOTL2;5730559C18RIK;PITPNC1;PDPK1;NAV1;ETV5;EPN2;ELF1;2510009E07RIK;TBX18;D…
NANOG-18692474	273	3052	0.174664	0.0725578	0.102106	4.87487e-39	-0.816605	72.0382	NDST1;FNBP1;DHDH;SET;ZC3HAV1;PIP5K1C;BTBD11;VANGL1;DLGAP3;DLGAP2;TOMM40L;PAFAH1B1;STX3;EGLN3;DAB2IP;SNX16;GZF1;ACLY;SHC4;KHDRBS3;G3BP2;ZKSCAN1;ZFP462;RASL10B;HTR1D;FBXO32;BCAR3;ACP6;TRIM62;SMCR8;BCAT1;PRKAA2;SRC;MLLT6;BAHD1;SYT17;CRKL;PEG10;TRIM25;CSNK1E;RIN1;TRIB2;ZBTB1;FBXL5;ACTR1B;EPS15;MAP3K3;GAD2;SH3RF2;KLHL5;TCEA1;INPPL1;CAST;FBXW11;TBC1D24;DAPP1;VCPIP1;TBC1D13;UBE2O;AMOTL2;RERE;PCTP;PITPNC…
SMAD3-18955504	202	1936	0.129239	0.0460262	0.0832124	8.31097e-37	-0.793097	65.8889	ITSN2;NDST1;ALKBH5;FNBP1;BCR;SKAP2;STRN;LIN54;MED19;RING1;PAFAH1B2;PAFAH1B1;DAB2IP;SNX16;SHC3;G3BP1;NADK;HTR1D;FBXO32;BCAR3;NUMA1;BICD1;BMP2K;BCAT1;TRIM56;EIF4H;FEM1B;RCBTB1;TRIM25;LGALS8;LIMCH1;RIN1;ZBTB1;GSPT1;AP4E1;AKAP13;ACTR1A;SUFU;CAP1;NFIL3;CAP2;SH3RF2;TCEA1;PNPLA2;CAST;DAPP1;VCPIP1;TBC1D13;AMOTL2;TNFAIP8;CYP26B1;NAV2;EPN2;SETBP1;CRY1;DNAH5;TROVE2;HNRNPU;EPS8;QTRTD1;MAP1B;ALX4;AFAP1L2;HOME…
SMAD2-18955504	202	1936	0.129239	0.0460262	0.0832124	8.31097e-37	-0.793097	65.8889	ITSN2;NDST1;ALKBH5;FNBP1;BCR;SKAP2;STRN;LIN54;MED19;RING1;PAFAH1B2;PAFAH1B1;DAB2IP;SNX16;SHC3;G3BP1;NADK;HTR1D;FBXO32;BCAR3;NUMA1;BICD1;BMP2K;BCAT1;TRIM56;EIF4H;FEM1B;RCBTB1;TRIM25;LGALS8;LIMCH1;RIN1;ZBTB1;GSPT1;AP4E1;AKAP13;ACTR1A;SUFU;CAP1;NFIL3;CAP2;SH3RF2;TCEA1;PNPLA2;CAST;DAPP1;VCPIP1;TBC1D13;AMOTL2;TNFAIP8;CYP26B1;NAV2;EPN2;SETBP1;CRY1;DNAH5;TROVE2;HNRNPU;EPS8;QTRTD1;MAP1B;ALX4;AFAP1L2;HOME…
NANOG-18347094	190	1908	0.121561	0.0453605	0.0762006	3.5633e-32	-0.901308	65.2656	NDST1;DPYSL3;SET;ZC3HAV1;VANGL1;FASN;DLGAP3;DLGAP2;TOMM40L;EGLN3;DAB2IP;SHC4;KHDRBS1;NEK9;HTR1B;BCAR3;ACP6;SMCR8;BCAT1;SRC;MLLT6;BAHD1;PEG10;TRIM25;CSNK1E;TRIB2;EPS15;MAP3K3;GAD2;KLHL5;TCEA1;INPPL1;UBE2Z;CAST;TCF7;TBC1D13;AMOTL2;TNFAIP8;PITPNC1;PDPK1;ETV5;EPN2;GPD1L;DDX17;EHD4;CDKN1A;RARG;SMG7;PHF8;UBL3;CIC;TRP53INP2;FGD4;USP1;ZFP397;FGF1;MAGI1;TLE4;TPM3;MORF4L2;SRGAP3;MCL1;OSBPL6;OSBPL3;SYNJ2;SC…
GATA4-21415370	190	2039	0.121561	0.0484749	0.0730862	7.62769e-29	-0.989137	64.0399	ITSN2;FNBP1;ADAMTS15;SFXN5;ARHGAP5;PGM2L1;CRYAB;SDAD1;SNX30;SNX16;CENPQ;NEK1;KHDRBS1;GMPS;ZKSCAN1;NEK7;NUMA1;ZFP408;ACP6;IMPACT;TRIM56;ROCK2;ZFP426;XBP1;RANBP10;MON1B;ARHGEF7;CAB39;ZFP11;EPS15;MAP3K1;ETAA1;TCEA1;INPPL1;NR3C1;TBC1D24;TTC26;ADAR;TNFAIP1;PITPNC1;CYP26B1;MKL2;NAV1;ETV5;ELF1;ERCC4;CDK5RAP2;FNDC3B;AFAP1;GTPBP8;QTRTD1;DAAM1;NUP98;HOMER1;RARB;SNCAIP;MKLN1;ZFP398;MAGI1;TPM3;USP3;FRMD4A;TO…
TFAP2C-20629094	149	1203	0.0953295	0.0286	0.0667295	2.49283e-34	-0.821627	63.573	HPCAL1;SET;AGAP1;AMZ1;NGFR;BTBD11;NR2F2;FASN;DUSP8;RILPL1;GGA2;ZSWIM6;MEF2D;DAB2IP;UBE2E1;SQSTM1;NPAS3;MBP;ZKSCAN1;CORO2A;BCAR3;BICD2;TRIM62;KSR2;TRIM56;PARD6G;FOXK1;EHBP1;BAIAP2;TBC1D22A;CSNK1E;KCTD10;SNX8;ATP6V1C2;DCLK1;WNK2;RGL1;NCOA1;ZHX2;GAB1;MN1;NCOA7;NEDD9;PAK2;CAP2;PLEKHA6;SH3RF3;NR3C1;BAALC;RGS6;HOMEZ;NPR3;DAPP1;TBC1D16;KLHL29;AUTS2;TJAP1;GNAO1;GNB1;TNFAIP8;MAST4;ATP2A3;CHD3;UBE2QL1;NAV1…
TCFCP2L1-18555785	199	1987	0.127319	0.0472387	0.0800806	4.99588e-34	-0.818812	62.7859	GMFG;DPYSL2;BCR;CLOCK;CRABP1;PPFIBP1;MED19;DLGAP4;RING1;TEX10;DAB2IP;SHKBP1;CRAT;GZF1;SHC4;KHDRBS3;HTR1B;ZFP408;BICD1;BMP2K;BCAT1;CRKL;RIN1;ZFP516;FBXL3;FBXL5;MON1B;ACY1;ACTR1A;TOX3;ARHGEF9;EPS15;MAP3K1;GAD2;TTC7;TCEA1;PNPLA2;ACTG1;CAST;PCID2;UEVLD;AMOTL2;5730559C18RIK;DACT3;SHROOM2;NAV1;GNB1L;NWD1;GTPBP8;WDR78;AF529169;DAAM1;ALX4;AFAP1L1;NR1D2;TOLLIP;CDKN1A;PHF1;PHF8;RPS15A;USP1;ZFP395;PPP1CB;17…
TCF3-18692474	146	1351	0.0934101	0.0321185	0.0612916	5.41886e-28	-0.959009	60.209	PRKACB;FNBP1;RFX4;SET;GSTM3;BTBD11;VANGL1;LRRC2;DLGAP2;SS18;TOMM40L;DMD;STX3;DAB2IP;SNX16;SESN2;PIM1;ZBTB38;UBE2E1;ACLY;FSCN1;SBNO1;ZBTB16;BCAR3;SLC25A1;SCHIP1;FSD1L;ACP6;FUNDC1;TRIM62;SMCR8;BCAT1;AHDC1;SRC;MLLT6;FEM1B;PTPN6;PEG10;TRIM25;KIF21A;KIF21B;8030462N17RIK;ULK1;TRIB2;ZBTB1;PIK3R5;DHX32;ANLN;FBXL5;BMI1;ZFR;RXRG;GAD2;TTC7;KLHL5;BAHCC1;DAPP1;RASGRP1;CALD1;TBC1D13;ZFHX2;KLHL21;AMOTL2;CHD3;CH…
REST-18959480	224	2868	0.143314	0.0681834	0.0751307	2.56953e-24	-1.00968	54.8441	JRK;NDST1;DPYSL5;AKT3;ZC3HAV1;HLCS;BTBD11;ARHGAP1;DLGAP3;DLGAP2;DLGAP4;ZSWIM5;KHDRBS3;FBXO41;API5;RASL10B;TRIM62;ZFP423;SRC;SYT17;A830018L16RIK;TRIM28;TBC1D22A;SMARCC1;KCTD10;GSPT1;EGR1;STAT5B;ZFP516;RAB7;PGGT1B;GAD2;PNMA2;KCNS2;CAST;FBXW11;TCF7;SYT9;GNAO1;AHI1;GNB1;NAV1;EPN2;CRY2;CRY1;BNIP2;QTRTD1;AF529169;PARD3;PHF2;CDKN1A;GMEB2;TEAD1;CEP68;RPS15A;YTHDF1;SNCAIP;MKLN1;RAB3C;RIMS4;PAPOLA;MAGI1;IP…
MTF2-20144788	274	2981	0.175304	0.0708699	0.104434	3.89964e-41	-0.574652	53.4686	IFT172;PTPDC1;RAVER2;BBX;BCR;CRABP1;RNF219;ZC3HAV1;ADAMTS15;BTBD11;NR2F2;LARP6;STRN;DLGAP3;JAK2;DLGAP2;DUSP8;SNX33;ZSWIM5;SAMD4;SHC4;SHC3;NPAS2;FBXO41;NPAS3;HTR1D;HTR1B;FBXO32;TRIM62;ADORA2A;ZFP423;SRF;MLLT3;KCTD21;BAHD1;LIMCH1;CSNK1E;BCORL1;TRIB2;ATP6V1C2;STAT5A;SLC10A4;EGR1;STAT5B;EGR3;CSRNP2;AKAP13;ZHX2;GAB1;GAB2;TOX3;ZADH2;ARHGEF7;PRICKLE2;GNAI1;NFIL3;EPS15;CAP2;GAD2;PNMA2;SH3RF3;TTC7;KCNS2;M…
E2F1-18555785	341	4172	0.21817	0.0991846	0.118986	9.18448e-42	-0.537468	50.7859	JRK;FNBP1;DHDH;SET;TARSL2;ZC3HAV1;CREBBP;SFXN5;RING1;TOMM40L;PAFAH1B1;SDAD1;SNX30;SNX27;STX3;SNX16;CIAPIN1;ZFP445;NEK1;NEK3;PIAS1;LENG1;EIF2S3X;ZKSCAN1;ZFP462;API5;NEK7;LRCH3;ZFP408;BICD2;BCAT1;TRIM56;ZFP426;GPKOW;CNBP;TRIM35;TRIM33;TRIM28;PEG10;ZBTB1;POLA1;FBXL3;AP4E1;ACTR1A;ACTR1B;SUFU;PRPF40A;ATPAF1;PEX19;ETAA1;PRDM2;DENND4C;MKRN3;5730559C18RIK;PCTP;PITPNC1;ETV5;ELF1;NWD1;MTA2;WARS2;SMUG1;ERCC…
CTNNB1-20460455	123	988	0.0786948	0.0234886	0.0552062	1.32333e-28	-0.79113	50.7844	AKT3;PRKACB;FNBP1;EML4;AGAP1;CREBBP;BTBD11;NR2F2;LARP4;MED19;KANK1;STAT6;EGLN3;STAT3;CENPN;FAM13A;STK39;MBP;FBXO32;MFHAS1;CDC73;PRKAA2;PPM1H;FOXK1;ZBTB44;EHBP1;MLLT6;BAIAP2;MYO1D;AHCYL2;CDC27;MED12L;RAB11FIP1;SUFU;ENC1;ZHX2;NEDD9;GNAI1;EPS15;CAP2;AP2B1;KLHL32;PDS5A;CAMTA1;TBC1D16;GULP1;GNAQ;AMOTL2;MAST4;AFF4;PITPNC1;PPP1R9B;NAV2;TBC1D1;ASAP2;TROVE2;GNG7;GALNT7;TRIO;DIP2B;WDR74;PARD3;HECW1;AFAP1L2…
SFPI1-20887958	236	2369	0.150992	0.0563203	0.0946714	3.22718e-40	-0.529933	48.1878	GMFG;PRKACA;TARSL2;PIP5K1C;LARP4;PPFIBP1;ARHGAP1;CHAF1A;DLGAP4;SPHK2;DLST;SNX30;RICTOR;ZFP446;NEK1;FAM118A;RINT1;GMPS;G3BP1;ZFP462;NUMA1;BICD1;SNAP29;UNKL;IMPACT;SRC;TRIM35;TRIM37;TRIM33;RCBTB1;TRIM25;TBC1D22A;SMARCC1;BCS1L;BCORL1;ZBTB1;MON1B;ATPAF1;CAB39;NAPG;MAP3K3;TTC7;PNPLA2;AMMECR1L;DENND4B;AHI1;UBE2N;TTC28;ELF1;RNF4;MTA2;DAAM1;NTHL1;ZSCAN12;HNRNPF;LYST;PHF8;CIC;GNL1;KAT2B;ADCY6;FGD1;FAM129B…
CCND1-20090754	195	2137	0.12476	0.0508047	0.0739553	1.48344e-28	-0.74234	47.5677	GMFG;TESK1;ALKBH5;SET;NR2F2;FASN;SFXN5;ARHGAP1;MED19;SPHK2;PGM2L1;SHKBP1;ZFP446;FBXO18;SHC3;BICD2;AP4M1;ACP6;SMCR8;MGRN1;SRF;MLLT6;FEM1B;TRIM28;SMARCC1;GOLPH3L;GSPT1;TTBK1;EGR1;RANBP10;MON1B;ACTR1A;SUFU;PRPF40A;B230354K17RIK;INPPL1;FBXW11;TBC1D24;VCPIP1;TBC1D13;TNFAIP8;TNFAIP1;PITPNC1;CRY1;ADD3;RNF4;EYA3;WARS2;SMUG1;PRKCI;GTPBP6;GTPBP1;HCFC1;ADI1;SMG7;CIC;SPTY2D1;UBN1;USP1;ORAOV1;WDR13;PPP1CB;USP…
TCF3-18467660	139	1388	0.0889315	0.0329981	0.0559334	8.36453e-24	-0.875895	46.5433	ITSN2;PRKACA;EML4;CLOCK;MTMR3;TARSL2;NR2F2;VANGL1;FASN;HEY1;DLGAP3;UPF1;DUSP8;TOMM40L;ZSWIM5;SLK;ZBTB37;FSCN1;RAD54L2;ZFP451;KHDRBS1;NPAS2;NEK7;VPS37A;PPM1A;BMP2K;SRF;MLLT6;FCHO2;FEM1C;FEM1B;MYO1D;TRIM28;PEG10;KCTD10;ULK2;TRIB2;ZBTB1;DHX32;XBP1;FBXL3;FBXL5;RAB7;NCOA5;NCOA7;FOXC1;SATB2;EPS15;PER2;GPAM;WWC2;MID2;NPR3;KLHL13;TBC1D13;GNAQ;GNB1;UBE2N;UBE2O;AMOTL2;GCLM;AFF4;YWHAG;RBM14;YWHAZ;SFPQ;CRY1;…
SOX17-20123909	184	1947	0.117722	0.0462877	0.0714346	1.33285e-28	-0.717703	46.0658	BBX;SKAP2;ZC3HAV1;PIP5K1C;VANGL1;SPHK2;TOMM40L;SDAD1;SNX16;SLA;NUDT12;ZFP451;G3BP2;ZKSCAN1;ZFP462;NEK7;ZFP408;SRC;GTPBP10;FEM1B;TRIM25;GOLPH3L;ZBTB1;RANBP10;RAB7;ACTR1B;CAP1;GAB1;GAB2;ATPAF1;PEX19;APTX;ACTG1;TBC1D24;VCPIP1;TBC1D13;TTC26;PDPK1;ADD3;EYA3;SMUG1;ERCC4;CDK5RAP2;WDR74;GTPBP6;HCFC1;RRS1;KITL;SMG7;TEAD1;RARB;YTHDF1;YTHDF3;MKLN1;9230112E08RIK;RAB5B;OSBPL3;BCL2L1;TLK2;PLEKHG1;WIPI2;RAB21;F…
MYC-19030024	319	3868	0.204095	0.0919573	0.112137	1.58234e-39	-0.493986	44.1337	ALKBH5;CLOCK;SET;SFXN5;RING1;TOMM40L;PAFAH1B2;SDAD1;SHKBP1;GZF1;ZFP446;NEK1;ZFP451;EIF2S3X;ZKSCAN1;NEK4;ZFP408;AP4M1;SMCR8;BCAT1;MLLT6;CNBP;TRIM35;TRIM37;TRIM33;RCBTB1;TRIM28;TRIM25;BCS1L;ZBTB1;XBP1;POLA1;FBXL3;FBXL5;ACTR1B;ZHX2;PRPF40A;MAP3K1;PEX19;PCID2;AHI1;TNFAIP1;TTC33;ETV5;GFOD1;NWD1;WARS2;PRKCD;WDR74;AFAP1;QTRTD1;HCFC1;NUP98;RRS1;CDKN1A;SMG7;RRP12;RPS15A;USP1;PPP1CB;IPO9;1700102P08RIK;TPM3…
PPARD-21283829	326	3447	0.208573	0.0819485	0.126625	4.0707e-52	-0.361361	42.7601	FAM110A;ALKBH5;DPYSL2;PRKACB;FNBP1;BCR;CREBBP;PAFAH1B1;SDAD1;SNX30;STX3;SNX16;SLK;SRCIN1;FBXO11;PIAS1;ZC4H2;NPAS2;HTR1B;BICD1;BICD2;UNC80;BCAT1;SRC;MLLT3;CNBP;TRIM37;PEG10;NEU3;SUFU;ZHX2;GAB1;PEX19;APTX;ETAA1;DENND5B;PRDM2;ENPP1;AUTS2;TNFAIP1;CYP26B1;CLVS1;ERCC4;GPD1L;WIPF3;PRKCI;WDR76;HECW1;CDKN1A;SETD7;LYST;FAM126B;RARB;SPTY2D1;FAM129B;FGD6;USP3;TOM1L2;OSBPL6;BCL2;LANCL2;TULP4;TTL;DNAJB5;DNAJB4…
NRF2-20460467	124	1055	0.0793346	0.0250814	0.0542532	8.80696e-27	-0.696381	41.7789	AKT3;FNBP1;ZC3HAV1;PRRT1;GSTM3;NR2F2;FAM135B;PSMG1;STRN;ARHGAP5;EEA1;IKBKG;SAMD4;EGLN3;DAB2IP;GZF1;CCNT2;FAM13C;FRMD8;FSCN1;SQSTM1;KHDRBS3;GLIS3;NEK7;BCAR3;PIK3CB;ERC2;PPP1R12A;ROCK2;PPM1H;PARD6G;PPM1D;CHORDC1;GOLPH3L;KCTD17;DHX37;FBXL3;DIRAS2;ENC1;MN1;NCOA7;CAP2;MAP3K1;SH3RF2;ETAA1;UBE2Z;RGS4;DAPP1;ACACB;PACSIN2;AUTS2;DENND4C;KLHL21;APPBP2;GCLM;PCTP;YWHAG;NCBP2;TTC33;NAV1;YWHAZ;SETBP1;CSTF2T;ADD…
NFE2L2-20460467	124	1055	0.0793346	0.0250814	0.0542532	8.80696e-27	-0.696381	41.7789	AKT3;FNBP1;ZC3HAV1;PRRT1;GSTM3;NR2F2;FAM135B;PSMG1;STRN;ARHGAP5;EEA1;IKBKG;SAMD4;EGLN3;DAB2IP;GZF1;CCNT2;FAM13C;FRMD8;FSCN1;SQSTM1;KHDRBS3;GLIS3;NEK7;BCAR3;PIK3CB;ERC2;PPP1R12A;ROCK2;PPM1H;PARD6G;PPM1D;CHORDC1;GOLPH3L;KCTD17;DHX37;FBXL3;DIRAS2;ENC1;MN1;NCOA7;CAP2;MAP3K1;ETAA1;SH3RF2;UBE2Z;RGS4;DAPP1;ACACB;PACSIN2;AUTS2;DENND4C;KLHL21;APPBP2;GCLM;PCTP;YWHAG;NCBP2;TTC33;NAV1;YWHAZ;SETBP1;CSTF2T;ADD…
TBX3-20139965	117	1068	0.074856	0.0253905	0.0494656	5.24893e-23	-0.809191	41.5127	MAPKBP1;RFX4;MTMR3;PPARGC1A;BTBD11;NR2F2;VANGL1;EEA1;2610301B20RIK;DLGAP3;DLGAP2;DLGAP4;DFFA;STAU1;SNX27;SESN2;KHDRBS1;GLIS3;FOXO1;GLIS2;NPAS3;MBP;PEG3;PPM1A;SMCR8;ZFP423;ZBTB44;PPM1F;MLLT6;NICN1;BAIAP2;PTPN3;CRKL;KIF21A;SFMBT2;ULK1;GSPT1;RANBP10;AP4E1;BMI1;NCOA1;ZHX2;TOX3;ZADH2;NCOA7;PLEKHA6;TCEA1;ACACB;VCPIP1;CAMTA1;AUTS2;AHI1;TNFAIP8;CHD2;CHD1;FYCO1;ARHGEF10;TBC1D1;INA;ADD3;GALNT7;TRIO;EPS8;DI…
DACH1-20351289	166	1698	0.106206	0.040368	0.065838	2.76175e-27	-0.533728	32.6396	ALKBH5;CLOCK;SKAP2;FASN;SPHK2;MED26;PAFAH1B1;TRAPPC10;CIAPIN1;GZF1;MTCH1;SLK;FBXO18;KHDRBS3;NPAS2;NEK4;HPS5;LRCH3;BCAR3;BICD2;ROCK2;FEM1B;TRIM37;TRIM25;KCTD10;TRIB2;ZBTB1;MED12L;SYNM;ACTR1A;SUFU;MAP3K3;PEBP1;UBE2Z;PCID2;TBC1D16;NAV2;CRY1;ASAP2;TRA2A;WARS2;OTUD1;WDR74;ADI1;TOLLIP;GMEB2;PHF1;TEAD1;WDR37;ASH1L;SPTY2D1;USP1;MAGI3;USP3;RAB35;MAP2K7;RAB6A;SRGAP1;OSBPL8;OSBPL3;MAP3K11;PLEKHM3;BCL2L1;DID…
SCL-21571218	180	1784	0.115163	0.0424126	0.0727506	4.20396e-31	-0.451273	31.5639	IFT172;GMFG;FAM110A;NDST1;BCR;ADAMTS15;EPB41L1;MED14;DLGAP2;TEX10;ZSWIM6;ZSWIM5;EGLN3;TRAPPC10;MTCH1;CORO2A;BICD1;UNC80;GPKOW;MYO1D;OPHN1;TBC1D22A;NEU3;KCNN3;EGR3;SYNM;CSRNP3;AKAP13;ATPAF1;PEBP1;POU3F4;DAPP1;GNAQ;RERE;TTC26;PITPNC1;FYCO1;CYP26B1;MKL2;NAV2;DNAH1;ASAP1;ASAP2;ADD3;FNDC3B;AFAP1;PARD3;NFATC1;CHM;LYST;RARB;PLEKHO2;GRAMD1B;FAM129B;FGD4;FGD6;YTHDF3;MKLN1;TLE4;FRMD4A;TOM1L2;SCRT2;SRGAP2;P…
CLOCK-20551151	64	407	0.0409469	0.00967596	0.0312709	6.82966e-20	-0.707828	31.2368	DAPK1;CLOCK;CHKA;ST13;NR2F2;CDKN1A;STAT3;DAB2IP;FGF1;PIM1;TLE4;ANKRD46;GPT2;USP3;PRPF4B;ACLY;MORF4L2;FSCN1;PFKFB3;AK3;NPAS2;RHOBTB2;MCL1;OSBPL9;CEP350;STK24;BCL2;AMD1;BICD2;PDCD6IP;DNAJB1;DNAJB4;MLXIP;DNAJA4;TRIB2;EGR1;XBP1;GADD45A;NDEL1;ZFR;NEDD9;TRAK1;ARNTL;XPO7;PER2;TARDBP;RGS2;NPR3;CALD1;UBC;MARK3;MGEA5;AUTS2;CHD6;ELAVL1;YWHAZ;THRAP3;PDXK;USP10;MAPK1;BNIP2;SASH1;MAPK14;LPIN1
NKX2-5-21415370	136	1507	0.0870122	0.0358272	0.0511849	1.21931e-19	-0.716787	31.2167	JRK;PPP4R1;EML4;MYNN;MTMR6;PIP5K1C;CREBBP;LARP6;1700030J22RIK;PPFIBP1;SFXN5;CDC42EP1;NKTR;ZFP446;CCNT2;ZFP458;LENG1;RINT1;MAPKAPK2;RAD54L2;SQSTM1;SCHIP1;CDC73;BICD2;BMP2K;ZFP426;BAHD1;D2HGDH;AHCYL1;TRIM28;PREB;ULK1;RIN1;DCLK3;FBXL5;RGL1;AKAP13;SUFU;ARIH1;NCOA1;CAP1;ARHGEF7;PLEKHA6;PER2;PNPLA2;KIF5A;BAHCC1;PCID2;TBC1D24;PDS5A;KIF3B;TBC1D13;PACSIN2;QSER1;AMOTL2;TTC26;CHD2;PITPNC1;FYCO1;CYP26B1;RASG…
SALL4-18804426	103	1006	0.0658989	0.0239165	0.0419824	1.7731e-18	-0.735506	30.0629	ITSN2;LIPG;BBX;STARD4;EML4;4930402H24RIK;VANGL1;FASN;HEY1;JAK2;SNX30;SDAD1;STX3;ZSWIM5;STAT3;SNX16;CCNT2;SESN3;SESN2;PPP1R16B;ZBTB37;FSCN1;PFKFB3;NPAS2;NADK;ZBTB16;NEK7;LRRC61;AAK1;PIK3CB;PPM1A;BMP2K;AHDC1;PPM1D;EHBP1;FEM1B;SPG20;RCBTB1;TRIM28;TRIM25;KIF21A;RAB11FIP5;ANLN;RGL1;RAB7;NCOA4;GAB2;FOXC1;SATB2;MAP3K3;MAP3K1;PLEKHA2;PLEKHA6;APTX;PER2;WWC2;RGS4;BAALC;VCPIP1;CALD1;TBC1D1;PRKCI;FNDC3B;WDR7…
[truncated: 179 more rows]

## Sheet: SuppData3 E2K blue.results_kina
Kinase	Substrates in Input	Substrates in Database	Input Fraction	Database Fraction	Difference	P-value	Z-score	Combined Score	Substrates
MAPK1	33	312	0.407407	0.0688286	0.338579	3.1374e-17	-2.2592	85.851	RB1;ATF2;RPS6KA1;MED1;CSNK2A1;AR;TP53;HIF1A;JUN;CREBBP;NR0B2;NCOA1;SREBF1;NCOA2;NCOA6;NCOA3;FOS;SREBF2;PPARG;RELA;NR3C1;EP300;MITF;FOXO1;SMAD4;SMAD3;ESR1;SP1;GSK3B;HDAC4;CEBPB;MAPK1;MAPK14
[truncated: 222 more rows]
